# Supplementary material for: Microdissected Pyramidal Cell Proteomics of Alzheimer Brain Reveals Alterations in Creatine Kinase B-Type, 14-3-3-γ, and Heat Shock Cognate 71
Source: Front Aging Neurosci. 2021 Nov 19;13:735334. doi: 10.3389/fnagi.2021.735334 (PMC8641652; doi:10.3389/fnagi.2021.735334)
Supplement: Supplementary Table 2 — Individual lists of the proteins identified from the mass spectrometric analysis including the number of peptides identified for each case (1–5). C: control; AD: Alzheimer’s disease. [file Table_2.XLSX]

## Sheet: AD1
Accession	Description	Score	Coverage	# Proteins	# Unique Peptides	# Peptides	# PSMs	Area	(Medium+Heavy)/Light	(Medium+Heavy)/Light Count	(Medium+Heavy)/Light Variability [%]	# AAs	MW [kDa]	calc. pI
P35527	Keratin, type I cytoskeletal 9 OS=Homo sapiens GN=KRT9 PE=1 SV=3 - [K1C9_HUMAN]	781.452	16.05	1	8	8	29	3.97465e+07	0.130206	4	33.029	623	62.0268	5.23682
	A2	Sequence	# PSMs	# Proteins	# Protein Groups	Protein Group Accessions	Modifications	ΔCn	Area	(Medium+Heavy)/Light	(Medium+Heavy)/Light Count	(Medium+Heavy)/Light Variability [%]	q-Value	PEP	IonScore	Exp Value	Charge	MH+ [Da]	ΔM [ppm]	RT [min]	# Missed Cleavages
	High	FSSSSGYGGGSSR	3	1	1	P35527		0	1.64219e+07				0	6.993e-14	75.16	7.46734e-08	2	1235.53	0.175603	32.5418	0
	High	SGGGGGGGLGSGGSIR	4	1	1	P35527		0	5.38564e+07				0	2.092e-13	69.57	1.06544e-06	2	1232.6	0.343097	36.8222	0
	High	STmQELNSR	5	1	1	P35527	M3(Oxidation)	0	0				0	0.000218	62.67	3.59602e-06	2	1081.49	0.125811	27.329	0
	High	FSSSGGGGGGGR	8	1	1	P35527		0	6.67567e+06				0	3.356e-07	58.56	8.84655e-06	2	982.434	-0.0599695	21.1925	0
	High	QGVDADINGLR	2	1	1	P35527		0	4.29843e+06	0.0859839	1		0	0.0001843	45.54	0.000342087	2	1157.59	-0.950208	50.5559	0
	High	GGSGGSYGGGGSGGGYGGGSGSR	1	1	1	P35527		0	2.57809e+06	0.873465	1		0	0.006022	42.32	5.8475e-05	2	1791.73	-1.55053	30.9766	0
	High	TLLDIDNTR	3	1	1	P35527		0	2.13772e+06	0.12774	1		0	0.0004501	38.56	0.00340627	2	1060.57	2.22535	55.9069	0
	High	mTLDDFR	3	1	1	P35527	M1(Oxidation)	0	48961220	0.132719	1		0	0.004177	26.72	0.0107471	2	913.408	-0.481402	46.8999	0
P14136	Glial fibrillary acidic protein OS=Homo sapiens GN=GFAP PE=1 SV=1 - [GFAP_HUMAN]	730.243	29.4	18	14	14	39	4.60488e+07	1.01055	6	79.0461	432	49.8496	5.51611
	A2	Sequence	# PSMs	# Proteins	# Protein Groups	Protein Group Accessions	Modifications	ΔCn	Area	(Medium+Heavy)/Light	(Medium+Heavy)/Light Count	(Medium+Heavy)/Light Variability [%]	q-Value	PEP	IonScore	Exp Value	Charge	MH+ [Da]	ΔM [ppm]	RT [min]	# Missed Cleavages
	High	ALAAELNQLR	3	1	1	P14136		0	2.01369e+07				0	1.605e-05	77.92	1.12198e-07	2	1098.63	0.438269	60.6674	0
	High	LLEGEENR	2	1	1	P14136		0	1.43172e+07				0	8.363e-08	66.36	2.682e-06	2	959.48	0.312171	34.5187	0
	High	FADLTDAAAR	3	1	1	P14136		0	1.79346e+07	0.816731	1		0	7.591e-05	64.37	5.17317e-06	2	1050.52	0.600678	49.551	0
	High	QEADEATLAR	3	1	1	P14136		0	10504295	3.1177	2	96.4367	0	2.92e-13	64.13	3.7864e-06	2	1103.53	-0.0352119	34.9081	0
	High	DNLAQDLATVR	2	1	1	P14136		0	38010198	1.25037	1		0	2.338e-13	60.01	1.36685e-05	2	1215.63	1.11182	63.2609	0
	High	EAASYQEALAR	3	1	1	P14136		0	63254884				0	2.961e-06	58.47	1.72102e-05	2	1208.59	1.09652	44.6878	0
	High	ELQEQLAR	4	1	1	P14136		0	34733674	0.625284	1		0	0.003986	29.11	0.0146065	2	986.527	0.388031	39.1432	0
	High	DGEVIKESK	3	1	1	P14136		0	3668701				0	0.006022	25.06	0.047875	2	1004.53	0.126702	32.5063	1
	High	GTNESLER	5	2	1	P14136		0	1.14054e+06				0.002	0.006022	28.9	0.0130113	2	905.431	-1.32798	26.8737	0
	High	ETSLDTK	5	1	1	P14136		0	0				0.002	0.007639	16.42	0.361434	2	793.395	1.10868	23.0686	0
	High	NAELLR	2	2	1	P14136		0	0				0.004	0.01175	27.03	0.0305155	2	715.409	-1.07373	41.5144	0
	High	mPPPLPTR	2	1	1	P14136	M1(Oxidation)	0	3.68813e+07	0.638074	1		0.004	0.01518	23.71	0.0629886	2	924.498	0.63061	40.0984	0
	High	FLEQQNK	1	18	1	P14136		0	14485862				0.004	0.01427	20.14	0.214474	2	906.468	-0.120499	34.1195	0
	High	ITIPVQTFSNLQIR	1	1	1	P14136		0	9.51433e+06				0.005	0.038	15.11	0.132577	2	1629.93	0.728851	76.2439	0
P04264	Keratin, type II cytoskeletal 1 OS=Homo sapiens GN=KRT1 PE=1 SV=6 - [K2C1_HUMAN]	705.928	11.02	1	8	8	26	8.85114e+07	0.183765	1		644	65.999	8.11865
	A2	Sequence	# PSMs	# Proteins	# Protein Groups	Protein Group Accessions	Modifications	ΔCn	Area	(Medium+Heavy)/Light	(Medium+Heavy)/Light Count	(Medium+Heavy)/Light Variability [%]	q-Value	PEP	IonScore	Exp Value	Charge	MH+ [Da]	ΔM [ppm]	RT [min]	# Missed Cleavages
	High	GSGGGSSGGSIGGR	9	1	1	P04264		0	17658774	0.183765	1		0	2.992e-19	88.82	9.05418e-09	2	1092.5	0.619071	22.2721	0
	High	YEELQITAGR	3	2	1	P04264		0	2.09157e+06				0	2.783e-08	61.39	1.0347e-05	2	1179.6	0.0340505	52.2793	0
	High	TNAENEFVTIK	2	1	1	P04264		0	2.43399e+07				0	2.312e-06	54.37	6.12371e-05	2	1265.64	-0.198169	55.1504	0
	High	TLLEGEESR	4	1	1	P04264		0	1.6676e+08				0	0.0001099	48.11	0.000219426	2	1033.52	0.90378	41.499	0
	High	SLVNLGGSK	4	1	1	P04264		0	6.42183e+07				0.002	0.008229	30.73	0.0167365	2	874.499	-0.333104	47.7517	0
	High	TNAENEFVTIKK	1	1	1	P04264		0	3.45554e+07				0.002	0.006022	29.65	0.0132781	3	1393.73	0.730545	55.2049	1
	High	SISISVAR	2	1	1	P04264		0	1.29873e+07				0.004	0.02494	25.22	0.0431372	2	832.491	2.30259	47.9631	0
	High	AQYEDIAQK	1	1	1	P04264		0	4.56256e+06				0.007	0.0547	13.31	0.846987	2	1065.52	-2.16315	37.3803	0
P25705	ATP synthase subunit alpha, mitochondrial OS=Homo sapiens GN=ATP5A1 PE=1 SV=1 - [ATPA_HUMAN]	377.262	16.27	1	9	9	17	3.02002e+07	0.714327	1		553	59.7136	9.12939
	A2	Sequence	# PSMs	# Proteins	# Protein Groups	Protein Group Accessions	Modifications	ΔCn	Area	(Medium+Heavy)/Light	(Medium+Heavy)/Light Count	(Medium+Heavy)/Light Variability [%]	q-Value	PEP	IonScore	Exp Value	Charge	MH+ [Da]	ΔM [ppm]	RT [min]	# Missed Cleavages
	High	ILGADTSVDLEETGR	2	1	1	P25705		0	3.2611e+07				0	3.414e-12	98.85	1.71366e-09	2	1575.79	0.0248202	58.5227	0
	High	AVDSLVPIGR	3	1	1	P25705		0	4.35575e+07				0	0.005598	57.24	1.51039e-05	2	1026.6	1.19354	59.1214	0
	High	VGSAAQTR	1	1	1	P25705		0	0				0	0.0004005	57.04	3.50912e-05	2	789.421	-0.319422	19.1731	0
	High	TGTAEmSSILEER	2	1	1	P25705	M6(Oxidation)	0	0				0	0.000194	50.9	6.34008e-05	2	1439.67	0.123869	46.5591	0
	High	APGIIPR	1	1	1	P25705		0	8.42164e+06	0.714327	1		0	0.001674	33.27	0.00183681	2	723.451	-0.18508	45.145	0
	High	VLSIGDGIAR	3	1	1	P25705		0	1.44319e+07				0.002	0.006022	35.39	0.00264497	2	1000.58	0.395562	57.1394	0
	High	STVAQLVk	1	1	1	P25705	C-Term(Label:18O(1))	0	1.02689e+07				0.002	0.006661	14.48	0.491903	2	847.513	0.115671	45.5336	0
	High	QmSLLLR	2	1	1	P25705	M2(Oxidation)	0	0				0.005	0.04301	23.63	0.0546224	2	876.498	0.398013	52.5946	0
	Medium	TSIAIDTIINQK	2	1	1	P25705		0	10649085				0.014	0.1003	12.7	0.539717	2	1316.74	-0.33154	65.4325	0
P61981	14-3-3 protein gamma OS=Homo sapiens GN=YWHAG PE=1 SV=2 - [1433G_HUMAN]	365.876	18.62	4	2	5	16	5.08507e+07				247	28.2849	4.89404
	A2	Sequence	# PSMs	# Proteins	# Protein Groups	Protein Group Accessions	Modifications	ΔCn	Area	(Medium+Heavy)/Light	(Medium+Heavy)/Light Count	(Medium+Heavy)/Light Variability [%]	q-Value	PEP	IonScore	Exp Value	Charge	MH+ [Da]	ΔM [ppm]	RT [min]	# Missed Cleavages
	High	NVTELNEPLSNEER	2	1	1	P61981		0	5.83515e+06				0	6.308e-11	77.43	2.12343e-07	2	1643.78	-1.43186	51.0854	0
	High	VISSIEQK	3	5	2	P61981;P27348		0	47394444				0	3.079e-05	40.29	0.0017913	2	903.514	-0.24398	35.5921	0
	High	ATVVESSEK	3	1	1	P61981		0	15546293				0	6.095e-06	28.86	0.0271735	2	949.482	-2.14357	26.5305	0
	High	LAEQAER	7	7	4	P61981;P27348;P62258;P63104		0	89611328				0.002	0.007183	53.83	4.6575e-05	2	816.421	-0.427971	25.1038	0
	Medium	NLLSVAYk	1	7	4	P61981;P27348;P62258;P63104	C-Term(Label:18O(1))	0	1.18366e+07				0.014	0.1105	18.3	0.146432	2	909.529	0.426824	59.3749	0
P22626	Heterogeneous nuclear ribonucleoproteins A2/B1 OS=Homo sapiens GN=HNRNPA2B1 PE=1 SV=2 - [ROA2_HUMAN]	348.96	12.46	1	4	4	17	1.02151e+07	0.308199	1		353	37.4067	8.95361
	A2	Sequence	# PSMs	# Proteins	# Protein Groups	Protein Group Accessions	Modifications	ΔCn	Area	(Medium+Heavy)/Light	(Medium+Heavy)/Light Count	(Medium+Heavy)/Light Variability [%]	q-Value	PEP	IonScore	Exp Value	Charge	MH+ [Da]	ΔM [ppm]	RT [min]	# Missed Cleavages
	High	QEmQEVQSSR	6	1	1	P22626	M3(Oxidation)	0	20283840	0.308199	1		0	3.286e-05	73.09	2.3809e-07	2	1237.55	3.53546	21.3967	0
	High	GGGGNFGPGPGSNFR	4	1	1	P22626		0	7.41496e+06				0	0.006022	38.23	0.000962011	2	1377.63	0.11975	49.6424	0
	High	GGNFGFGDSR	4	1	1	P22626		0	2.94658e+06				0.002	0.008262	28.8	0.00441616	2	1013.44	-0.483009	47.9505	0
	High	TLETVPLER	3	1	1	P22626		0	0				0.004	0.01089	11.93	0.638004	2	1057.59	0.521722	53.2064	0
P63104	14-3-3 protein zeta/delta OS=Homo sapiens GN=YWHAZ PE=1 SV=1 - [1433Z_HUMAN]	332.75	11.84	1	1	3	10	4.77442e+07	1.08585	1		245	27.7277	4.79248
	A2	Sequence	# PSMs	# Proteins	# Protein Groups	Protein Group Accessions	Modifications	ΔCn	Area	(Medium+Heavy)/Light	(Medium+Heavy)/Light Count	(Medium+Heavy)/Light Variability [%]	q-Value	PEP	IonScore	Exp Value	Charge	MH+ [Da]	ΔM [ppm]	RT [min]	# Missed Cleavages
	High	SVTEQGAELSNEER	2	1	1	P63104		0	41784674	1.08585	1		0	2.854e-19	77.55	1.07233e-07	2	1548.71	-0.722721	40.0226	0
	High	LAEQAER	7	7	4	P61981;P27348;P62258;P63104		0	89611328				0.002	0.007183	53.83	4.6575e-05	2	816.421	-0.427971	25.1038	0
	Medium	NLLSVAYk	1	7	4	P61981;P27348;P62258;P63104	C-Term(Label:18O(1))	0	1.18366e+07				0.014	0.1105	18.3	0.146432	2	909.529	0.426824	59.3749	0
P62258	14-3-3 protein epsilon OS=Homo sapiens GN=YWHAE PE=1 SV=1 - [1433E_HUMAN]	285.46	10.98	1	1	3	10	5.07239e+07				255	29.1554	4.7417
	A2	Sequence	# PSMs	# Proteins	# Protein Groups	Protein Group Accessions	Modifications	ΔCn	Area	(Medium+Heavy)/Light	(Medium+Heavy)/Light Count	(Medium+Heavy)/Light Variability [%]	q-Value	PEP	IonScore	Exp Value	Charge	MH+ [Da]	ΔM [ppm]	RT [min]	# Missed Cleavages
	High	VAGmDVELTVEER	2	1	1	P62258	M4(Oxidation)	0	0				0	7.099e-08	53.16	5.14458e-05	2	1463.71	0.856672	53.0045	0
	High	LAEQAER	7	7	4	P61981;P27348;P62258;P63104		0	89611328				0.002	0.007183	53.83	4.6575e-05	2	816.421	-0.427971	25.1038	0
	Medium	NLLSVAYk	1	7	4	P61981;P27348;P62258;P63104	C-Term(Label:18O(1))	0	1.18366e+07				0.014	0.1105	18.3	0.146432	2	909.529	0.426824	59.3749	0
P27348	14-3-3 protein theta OS=Homo sapiens GN=YWHAQ PE=1 SV=1 - [1433T_HUMAN]	276.597	15.1	4	1	4	12	4.96141e+07				245	27.7468	4.77979
	A2	Sequence	# PSMs	# Proteins	# Protein Groups	Protein Group Accessions	Modifications	ΔCn	Area	(Medium+Heavy)/Light	(Medium+Heavy)/Light Count	(Medium+Heavy)/Light Variability [%]	q-Value	PEP	IonScore	Exp Value	Charge	MH+ [Da]	ΔM [ppm]	RT [min]	# Missed Cleavages
	High	VISSIEQK	3	5	2	P61981;P27348		0	47394444				0	3.079e-05	40.29	0.0017913	2	903.514	-0.24398	35.5921	0
	High	AVTEQGAELSNEER	1	1	1	P27348		0	4.48415e+06				0	0.001653	37.53	0.0017837	2	1532.72	3.75384	39.3651	0
	High	LAEQAER	7	7	4	P61981;P27348;P62258;P63104		0	89611328				0.002	0.007183	53.83	4.6575e-05	2	816.421	-0.427971	25.1038	0
	Medium	NLLSVAYk	1	7	4	P61981;P27348;P62258;P63104	C-Term(Label:18O(1))	0	1.18366e+07				0.014	0.1105	18.3	0.146432	2	909.529	0.426824	59.3749	0
P11137	Microtubule-associated protein 2 OS=Homo sapiens GN=MAP2 PE=1 SV=4 - [MAP2_HUMAN]	231.325	3.39	1	5	5	9	1.11709e+07				1827	199.404	4.90674
	A2	Sequence	# PSMs	# Proteins	# Protein Groups	Protein Group Accessions	Modifications	ΔCn	Area	(Medium+Heavy)/Light	(Medium+Heavy)/Light Count	(Medium+Heavy)/Light Variability [%]	q-Value	PEP	IonScore	Exp Value	Charge	MH+ [Da]	ΔM [ppm]	RT [min]	# Missed Cleavages
	High	SVPSETVVEDSR	3	1	1	P11137		0	1.60655e+06				0	5.291e-14	67.35	2.82559e-06	2	1304.63	0.241455	42.7327	0
	High	LASVSADAEVAR	2	1	1	P11137		0	20034600				0	3.577e-06	38.23	0.00236745	2	1188.62	0.542554	43.2434	0
	High	AmTEPSALIEK	1	1	1	P11137	M2(Oxidation)	0	2.33364e+06				0	2.199e-07	36.11	0.00345318	2	1205.61	-0.171262	46.2759	0
	High	SLQQTSGPATAK	2	1	1	P11137		0	1.11445e+07				0	0.0002064	33.43	0.00708149	2	1188.62	1.48367	30.1773	0
	High	SDTLQITDLGVSGAR	1	1	1	P11137		0	2.24286e+06				0.002	0.006022	36.97	0.00302368	2	1532.79	0.39833	63.848	0
P04350	Tubulin beta-4A chain OS=Homo sapiens GN=TUBB4A PE=1 SV=2 - [TBB4A_HUMAN]	146.926	18.92	5	2	6	10	1.05e+08	0.92533	1		444	49.5539	4.88135
	A2	Sequence	# PSMs	# Proteins	# Protein Groups	Protein Group Accessions	Modifications	ΔCn	Area	(Medium+Heavy)/Light	(Medium+Heavy)/Light Count	(Medium+Heavy)/Light Variability [%]	q-Value	PEP	IonScore	Exp Value	Charge	MH+ [Da]	ΔM [ppm]	RT [min]	# Missed Cleavages
	High	AVLVDLEPGTmDSVR	3	3	2	P04350;P68371	M11(Oxidation)	0	180190028				0	9.084e-14	47.66	0.000223671	2	1617.81	-0.22085	62.3369	0
	High	ALTVPELTQQmFDAK	2	3	3	Q13509;P04350;P68371	M11(Oxidation)	0	107315508				0	8.144e-11	43.28	0.000723637	2	1707.86	-0.461692	66.7489	0
	High	ImNTFSVVPSPk	1	4	3	Q13509;P04350;P68371	M2(Oxidation); C-Term(Label:18O(1))	0	27494306				0	0.001444	36.03	0.00315566	2	1337.7	0.776128	57.5723	0
	High	FPGQLNADLr	2	10	3	Q13509;P04350;P68371	C-Term(Label:18O(1))	0	0				0	4.151e-05	31.76	0.00870183	2	1132.6	0.923747	59.3589	0
	High	mSmKEVDEQmLSVQSK	1	1	1	P04350	M1(Oxidation); M3(Oxidation); M10(Oxidation)	0	1.71669e+06				0.002	0.006022	16.59	0.0811338	3	1917.86	0.789556	43.291	1
	Medium	INVYYNEATGGNYVPR	1	1	1	P04350		0	3.42348e+06	0.92533	1		0.032	0.2141	21.36	0.0928547	2	1829.89	2.15118	59.7969	0
P61764	Syntaxin-binding protein 1 OS=Homo sapiens GN=STXBP1 PE=1 SV=1 - [STXB1_HUMAN]	144.61	5.22	1	3	3	5	1.9895e+07	0.752651	3	7.4236	594	67.5259	6.96143
	A2	Sequence	# PSMs	# Proteins	# Protein Groups	Protein Group Accessions	Modifications	ΔCn	Area	(Medium+Heavy)/Light	(Medium+Heavy)/Light Count	(Medium+Heavy)/Light Variability [%]	q-Value	PEP	IonScore	Exp Value	Charge	MH+ [Da]	ΔM [ppm]	RT [min]	# Missed Cleavages
	High	SSASFSTTAVSAR	2	1	1	P61764		0	50168486	0.715941	1		0	3.835e-15	67.71	2.245e-06	2	1271.62	0.716765	43.7467	0
	High	ISEQTYQLSR	1	1	1	P61764		0	6372458	0.851275	1		0	2.151e-06	33.72	0.00673022	2	1224.62	0.359908	44.4088	0
	High	SQLLILDR	2	1	1	P61764		0	3.14391e+06	0.752651	1		0.005	0.04997	20.47	0.069102	2	957.574	0.892565	63.1528	0
P80723	Brain acid soluble protein 1 OS=Homo sapiens GN=BASP1 PE=1 SV=2 - [BASP1_HUMAN]	144.576	45.81	1	6	6	10	5.34037e+07				227	22.68	4.62744
	A2	Sequence	# PSMs	# Proteins	# Protein Groups	Protein Group Accessions	Modifications	ΔCn	Area	(Medium+Heavy)/Light	(Medium+Heavy)/Light Count	(Medium+Heavy)/Light Variability [%]	q-Value	PEP	IonScore	Exp Value	Charge	MH+ [Da]	ΔM [ppm]	RT [min]	# Missed Cleavages
	High	ETPAATEAPSSTPK	2	1	1	P80723		0	135324978				0	8.809e-08	49.59	0.000127485	2	1386.68	0.315284	32.6046	0
	High	ESEPQAAAEPAEAK	2	1	1	P80723		0	1.82047e+07				0	0.0004295	22.86	0.0468434	2	1427.67	0.344319	33.3639	0
	High	SDGAPASDSKPGSSEAAPSSK	1	1	1	P80723		0	6.6814e+06				0	3.083e-07	20.63	0.0484382	3	1932.88	0.34046	31.3905	0
	High	KTEAPAAPAAQETK	3	1	1	P80723		0	97517.8				0.002	0.006022	32.07	0.00813338	3	1412.74	0.24467	34.8996	1
	High	AEGAATEEEGTPK	1	1	1	P80723		0	1.68579e+06				0.002	0.007308	24.75	0.0155759	2	1289.58	-1.24794	27.9664	0
	High	AAEAAAAPAESAAPAAGEEPSKEEGEPK	1	1	1	P80723		0	1.25354e+06				0.002	0.006402	12.9	0.35131	3	2636.24	3.75587	43.31	1
Q16555	Dihydropyrimidinase-related protein 2 OS=Homo sapiens GN=DPYSL2 PE=1 SV=1 - [DPYL2_HUMAN]	143.336	8.57	3	5	5	12	25639866	2.57339	2	315.165	572	62.2546	6.37939
	A2	Sequence	# PSMs	# Proteins	# Protein Groups	Protein Group Accessions	Modifications	ΔCn	Area	(Medium+Heavy)/Light	(Medium+Heavy)/Light Count	(Medium+Heavy)/Light Variability [%]	q-Value	PEP	IonScore	Exp Value	Charge	MH+ [Da]	ΔM [ppm]	RT [min]	# Missed Cleavages
	High	SSAEVIAQAR	3	1	1	Q16555		0	28370943	0.906739	1		0	8.559e-06	38.24	0.00258696	2	1031.55	1.62757	38.7267	0
	High	GSPLVVISQGK	3	1	1	Q16555		0	9699378	7.30346	1		0	3.593e-08	32.01	0.00415474	2	1084.64	1.02645	55.6303	0
	High	QQAPPVR	2	1	1	Q16555		0	7.19588e+06				0.002	0.008076	18.45	0.221479	2	795.448	0.83128	26.864	0
	High	IVAPPGGR	3	3	1	Q16555		0	38849277				0.005	0.03121	25.3	0.0259706	2	766.457	-0.521487	33.4606	0
	High	QIGENLIVPGGVK	1	2	1	Q16555		0	8.54991e+06				0.009	0.06083	19.21	0.0659725	2	1323.76	1.07471	62.757	0
P68371	Tubulin beta-4B chain OS=Homo sapiens GN=TUBB4B PE=1 SV=1 - [TBB4B_HUMAN]	142.858	15.28	5	1	5	9	1.05e+08				445	49.799	4.89404
	A2	Sequence	# PSMs	# Proteins	# Protein Groups	Protein Group Accessions	Modifications	ΔCn	Area	(Medium+Heavy)/Light	(Medium+Heavy)/Light Count	(Medium+Heavy)/Light Variability [%]	q-Value	PEP	IonScore	Exp Value	Charge	MH+ [Da]	ΔM [ppm]	RT [min]	# Missed Cleavages
	High	AVLVDLEPGTmDSVR	3	3	2	P04350;P68371	M11(Oxidation)	0	180190028				0	9.084e-14	47.66	0.000223671	2	1617.81	-0.22085	62.3369	0
	High	ALTVPELTQQmFDAK	2	3	3	Q13509;P04350;P68371	M11(Oxidation)	0	107315508				0	8.144e-11	43.28	0.000723637	2	1707.86	-0.461692	66.7489	0
	High	ImNTFSVVPSPk	1	4	3	Q13509;P04350;P68371	M2(Oxidation); C-Term(Label:18O(1))	0	27494306				0	0.001444	36.03	0.00315566	2	1337.7	0.776128	57.5723	0
	High	FPGQLNADLr	2	10	3	Q13509;P04350;P68371	C-Term(Label:18O(1))	0	0				0	4.151e-05	31.76	0.00870183	2	1132.6	0.923747	59.3589	0
	High	mSmKEVDEQmLNVQNK	1	4	1	P68371	M1(Oxidation); M3(Oxidation); M10(Oxidation)	0	3.18403e+06				0.004	0.009166	19.48	0.0422699	3	1971.88	-1.28026	43.2001	1
Q13509	Tubulin beta-3 chain OS=Homo sapiens GN=TUBB3 PE=1 SV=2 - [TBB3_HUMAN]	140.135	11.56	4	1	4	7	94119609				450	50.4003	4.93213
	A2	Sequence	# PSMs	# Proteins	# Protein Groups	Protein Group Accessions	Modifications	ΔCn	Area	(Medium+Heavy)/Light	(Medium+Heavy)/Light Count	(Medium+Heavy)/Light Variability [%]	q-Value	PEP	IonScore	Exp Value	Charge	MH+ [Da]	ΔM [ppm]	RT [min]	# Missed Cleavages
	High	AILVDLEPGTmDSVR	2	4	1	Q13509	M11(Oxidation)	0	147549013				0	1.13e-08	48.59	0.000215836	2	1631.83	0.214561	66.1637	0
	High	ALTVPELTQQmFDAK	2	3	3	Q13509;P04350;P68371	M11(Oxidation)	0	107315508				0	8.144e-11	43.28	0.000723637	2	1707.86	-0.461692	66.7489	0
	High	ImNTFSVVPSPk	1	4	3	Q13509;P04350;P68371	M2(Oxidation); C-Term(Label:18O(1))	0	27494306				0	0.001444	36.03	0.00315566	2	1337.7	0.776128	57.5723	0
	High	FPGQLNADLr	2	10	3	Q13509;P04350;P68371	C-Term(Label:18O(1))	0	0				0	4.151e-05	31.76	0.00870183	2	1132.6	0.923747	59.3589	0
P13637	Sodium/potassium-transporting ATPase subunit alpha-3 OS=Homo sapiens GN=ATP1A3 PE=1 SV=3 - [AT1A3_HUMAN]	128.218	7.6	2	5	7	9	1.87728e+07	1.35148	2	68.6236	1013	111.677	5.37646
	A2	Sequence	# PSMs	# Proteins	# Protein Groups	Protein Group Accessions	Modifications	ΔCn	Area	(Medium+Heavy)/Light	(Medium+Heavy)/Light Count	(Medium+Heavy)/Light Variability [%]	q-Value	PEP	IonScore	Exp Value	Charge	MH+ [Da]	ΔM [ppm]	RT [min]	# Missed Cleavages
	High	LNIPVSQVNPR	2	2	1	P13637		0	29097470	0.888878	1		0	1.898e-13	43.98	0.000329954	2	1236.71	0.319499	54.9678	0
	High	ADIGVAmGIAGSDVSK	1	2	1	P13637	M7(Oxidation)	0	3.18623e+06	2.05482	1		0	0.00223	38.11	0.00217108	2	1506.75	0.930689	51.2191	0
	High	GVVVATGDR	2	1	1	P13637		0	4736915				0	0.006022	30.61	0.0141641	2	873.478	-1.02738	34.5358	0
	High	GVGIISEGNETVEDIAAR	1	3	2	P13637;P50993		0	7.52e+06				0	2.374e-07	28.24	0.0169464	2	1829.92	-2.63085	67.1885	0
	High	KADIGVAmGIAGSDVSK	1	2	1	P13637	M8(Oxidation)	0	0				0.002	0.006022	14.34	0.469364	3	1634.84	-0.0833768	53.3324	1
	High	AAVPDAVGK	1	3	2	P13637;P50993		0	1.97009e+07				0.004	0.01854	17.11	0.185782	2	827.461	-1.54356	35.5714	0
	High	DVAGDASESALLK	1	1	1	P13637		0	0				0.009	0.06495	17.61	0.224528	2	1275.64	1.04204	52.0646	0
P06576	ATP synthase subunit beta, mitochondrial OS=Homo sapiens GN=ATP5B PE=1 SV=3 - [ATPB_HUMAN]	128.16	5.86	1	3	3	5	1.55718e+07	1.85166	2	4.54267	529	56.5246	5.40186
	A2	Sequence	# PSMs	# Proteins	# Protein Groups	Protein Group Accessions	Modifications	ΔCn	Area	(Medium+Heavy)/Light	(Medium+Heavy)/Light Count	(Medium+Heavy)/Light Variability [%]	q-Value	PEP	IonScore	Exp Value	Charge	MH+ [Da]	ΔM [ppm]	RT [min]	# Missed Cleavages
	High	TIAmDGTEGLVR	3	1	1	P06576	M4(Oxidation)	0	0				0	1.065e-05	52.07	9.25095e-05	2	1278.64	3.63216	48.0439	0
	High	VVDLLAPYAk	1	1	1	P06576	C-Term(Label:18O(1))	0	14110161	1.79581	1		0.002	0.006467	37.61	0.00174247	2	1090.64	0.906887	67.6705	0
	High	VLDSGAPIk	1	1	1	P06576	C-Term(Label:18O(1))	0	1.70335e+07	1.90924	1		0.002	0.006315	29.45	0.0136201	2	901.525	0.830262	41.2248	0
Q9BQE3	Tubulin alpha-1C chain OS=Homo sapiens GN=TUBA1C PE=1 SV=1 - [TBA1C_HUMAN]	123.9	7.13	5	2	3	5	6.73877e+07				449	49.8635	5.09717
	A2	Sequence	# PSMs	# Proteins	# Protein Groups	Protein Group Accessions	Modifications	ΔCn	Area	(Medium+Heavy)/Light	(Medium+Heavy)/Light Count	(Medium+Heavy)/Light Variability [%]	q-Value	PEP	IonScore	Exp Value	Charge	MH+ [Da]	ΔM [ppm]	RT [min]	# Missed Cleavages
	High	AVFVDLEPTVIDEVR	1	3	1	Q9BQE3		0	131933936				0	1.187e-05	46.08	0.000230575	2	1701.9	-0.538499	78.3812	0
	High	DVNAAIATIK	3	5	1	Q9BQE3		0	0				0	0.0006379	44.64	0.000365889	2	1015.58	0.964899	51.9273	0
	Medium	FDLmYAk	1	6	2	Q9BQE3;P68366	M4(Oxidation); C-Term(Label:18O(1))	0	2.84137e+06				0.024	0.1684	15.01	0.29026	2	905.433	0.345124	53.6772	0
Q13813	Spectrin alpha chain, non-erythrocytic 1 OS=Homo sapiens GN=SPTAN1 PE=1 SV=3 - [SPTN1_HUMAN]	117.32	2.06	1	5	5	5	2.5058e+06	0.732984	1		2472	284.364	5.35107
	A2	Sequence	# PSMs	# Proteins	# Protein Groups	Protein Group Accessions	Modifications	ΔCn	Area	(Medium+Heavy)/Light	(Medium+Heavy)/Light Count	(Medium+Heavy)/Light Variability [%]	q-Value	PEP	IonScore	Exp Value	Charge	MH+ [Da]	ΔM [ppm]	RT [min]	# Missed Cleavages
	High	VLETAEDIQER	1	1	1	Q13813		0	2.75603e+06				0	0.0001863	69.08	1.77976e-06	2	1302.66	2.68742	44.6813	0
	High	EANQQQQFNR	1	1	1	Q13813		0	4.1297e+06	0.732984	1		0	2.904e-06	49.78	9.73065e-05	2	1262.59	0.230252	29.3923	0
	High	VNEVNQFAAK	1	1	1	Q13813		0	0				0.002	0.008897	24.38	0.0598196	2	1119.58	1.78203	42.3742	0
	High	EAGSVSLR	1	1	1	Q13813		0	631653				0.009	0.06495	24.99	0.0649761	2	818.436	-1.05407	35.9181	0
	Medium	GVIDmGNSLIER	1	1	1	Q13813	M5(Oxidation)	0	611170				0.012	0.07393	22.08	0.0966328	2	1319.67	2.82571	55.6983	0
P60709	Actin, cytoplasmic 1 OS=Homo sapiens GN=ACTB PE=1 SV=1 - [ACTB_HUMAN]	115.783	23.73	11	7	7	11	1.86762e+07	3.0611	3	21.5889	375	41.7097	5.47803
	A2	Sequence	# PSMs	# Proteins	# Protein Groups	Protein Group Accessions	Modifications	ΔCn	Area	(Medium+Heavy)/Light	(Medium+Heavy)/Light Count	(Medium+Heavy)/Light Variability [%]	q-Value	PEP	IonScore	Exp Value	Charge	MH+ [Da]	ΔM [ppm]	RT [min]	# Missed Cleavages
	High	VAPEEHPVLLTEAPLNPK	1	2	1	P60709		0	1.29882e+07	1.91969	1		0	3.258e-07	42	0.000406967	3	1954.07	1.14852	65.1712	0
	High	EITALAPSTmK	2	6	1	P60709	M10(Oxidation)	0	0				0	1.383e-05	37.96	0.00313513	2	1177.61	0.69381	45.3358	0
	High	HQGVmVGmGQk	1	7	1	P60709	M5(Oxidation); M8(Oxidation); C-Term(Label:18O(1))	0	0				0	0.0005272	13.71	0.366015	3	1205.57	0.136855	34.8775	0
	High	AGFAGDDAPR	2	10	1	P60709		0	0				0.002	0.006022	26.49	0.0137999	2	976.448	-0.125505	36.778	0
	High	GYSFTTTAEr	2	2	1	P60709	C-Term(Label:18O(1))	0	0				0.002	0.006022	23.42	0.0375365	2	1134.53	0.187187	46.5829	0
	High	DLYANTVLSGGTTmYPGIADr	1	2	1	P60709	M14(Oxidation); C-Term(Label:18O(1))	0	8263443	3.0611	1		0.002	0.006022	15.16	0.254499	3	2233.07	0.371317	68.756	0
	High	DLTDYLmk	2	7	1	P60709	M7(Oxidation); C-Term(Label:18O(1))	0	34776995	3.53507	1		0.004	0.0127	21.16	0.0635445	2	1016.49	0.84942	58.2117	0
P07196	Neurofilament light polypeptide OS=Homo sapiens GN=NEFL PE=1 SV=3 - [NFL_HUMAN]	108.783	3.31	1	1	2	4	3.29583e+07	0.439943	1		543	61.4792	4.65283
	A2	Sequence	# PSMs	# Proteins	# Protein Groups	Protein Group Accessions	Modifications	ΔCn	Area	(Medium+Heavy)/Light	(Medium+Heavy)/Light Count	(Medium+Heavy)/Light Variability [%]	q-Value	PEP	IonScore	Exp Value	Charge	MH+ [Da]	ΔM [ppm]	RT [min]	# Missed Cleavages
	High	LAAEDATNEK	3	1	1	P07196		0	3.29583e+07	0.439943	1		0	2.183e-06	60.82	7.41008e-06	2	1061.51	0.490723	29.4069	0
	High	LLEGEETR	1	3	3	Q16352;P07196;P07197		0	0				0.004	0.01082	17.22	0.252262	2	946.485	0.650237	35.6247	0
Q00577	Transcriptional activator protein Pur-alpha OS=Homo sapiens GN=PURA PE=1 SV=2 - [PURA_HUMAN]	108.261	3.11	1	1	1	3	6317806				322	34.8894	6.44287
	A2	Sequence	# PSMs	# Proteins	# Protein Groups	Protein Group Accessions	Modifications	ΔCn	Area	(Medium+Heavy)/Light	(Medium+Heavy)/Light Count	(Medium+Heavy)/Light Variability [%]	q-Value	PEP	IonScore	Exp Value	Charge	MH+ [Da]	ΔM [ppm]	RT [min]	# Missed Cleavages
	High	IAEVGAGGNK	3	1	1	Q00577		0	6317806				0	3.241e-06	55.35	3.67596e-05	2	915.49	0.141222	28.4861	0
P52272	Heterogeneous nuclear ribonucleoprotein M OS=Homo sapiens GN=HNRNPM PE=1 SV=3 - [HNRPM_HUMAN]	106.658	6.03	1	4	4	5	5.2637e+06				730	77.4643	8.70459
	A2	Sequence	# PSMs	# Proteins	# Protein Groups	Protein Group Accessions	Modifications	ΔCn	Area	(Medium+Heavy)/Light	(Medium+Heavy)/Light Count	(Medium+Heavy)/Light Variability [%]	q-Value	PEP	IonScore	Exp Value	Charge	MH+ [Da]	ΔM [ppm]	RT [min]	# Missed Cleavages
	High	QGGGGGGGSVPGIER	1	1	1	P52272		0	5.32981e+06				0	1.126e-07	53	5.73859e-05	2	1284.63	-0.850007	39.8166	0
	High	mGPAIER	2	1	1	P52272	M1(Oxidation)	0	8.12528e+06				0	0.006022	31.54	0.00736528	2	789.392	-0.881823	31.4238	0
	High	VGQTIER	1	1	1	P52272		0	0				0.002	0.006022	37.76	0.00381887	2	802.442	-0.0277596	29.9004	0
	High	mGLAmGGGGGASFDR	1	1	1	P52272	M1(Oxidation); M5(Oxidation)	0	2.33601e+06				0.004	0.02016	38.24	0.00042741	2	1415.61	0.930428	43.3116	0
Q03252	Lamin-B2 OS=Homo sapiens GN=LMNB2 PE=1 SV=3 - [LMNB2_HUMAN]	99.4998	6	1	3	3	4	1.04409e+07				600	67.6475	5.35107
	A2	Sequence	# PSMs	# Proteins	# Protein Groups	Protein Group Accessions	Modifications	ΔCn	Area	(Medium+Heavy)/Light	(Medium+Heavy)/Light Count	(Medium+Heavy)/Light Variability [%]	q-Value	PEP	IonScore	Exp Value	Charge	MH+ [Da]	ΔM [ppm]	RT [min]	# Missed Cleavages
	High	ATSSSSGSLSATGR	2	1	1	Q03252		0	5.42199e+06				0	3.082e-10	75.49	3.09324e-07	2	1268.61	0.258965	29.3907	0
	High	AGGPATPLSPTR	1	1	1	Q03252		0	1.54599e+07				0	0.002813	31.39	0.0101292	2	1124.61	-0.0255559	41.4607	0
	High	EGELTVAQGR	1	1	1	Q03252		0	0				0	0.003789	24.51	0.0534536	2	1059.54	1.88588	38.4302	0
P38606	V-type proton ATPase catalytic subunit A OS=Homo sapiens GN=ATP6V1A PE=1 SV=2 - [VATA_HUMAN]	99.3567	3.89	1	2	2	3	1.00132e+07	0.80016	2	54.6896	617	68.2605	5.51611
	A2	Sequence	# PSMs	# Proteins	# Protein Groups	Protein Group Accessions	Modifications	ΔCn	Area	(Medium+Heavy)/Light	(Medium+Heavy)/Light Count	(Medium+Heavy)/Light Variability [%]	q-Value	PEP	IonScore	Exp Value	Charge	MH+ [Da]	ΔM [ppm]	RT [min]	# Missed Cleavages
	High	TALVANTSNmPVAAR	2	1	1	P38606	M10(Oxidation)	0	1.5065e+07	1.12985	1		0	1.259e-08	75.85	3.60122e-07	2	1531.79	-0.919594	42.5853	0
	High	GVNVSALSR	1	1	1	P38606		0	4.96133e+06	0.566675	1		0.002	0.006026	31.67	0.0113688	2	902.507	1.24881	45.4567	0
Q9UQM7	Calcium/calmodulin-dependent protein kinase type II subunit alpha OS=Homo sapiens GN=CAMK2A PE=1 SV=2 - [KCC2A_HUMAN]	94.3433	4.81	3	2	2	3	2.67118e+07	0.873189	1		478	54.0535	7.07861
	A2	Sequence	# PSMs	# Proteins	# Protein Groups	Protein Group Accessions	Modifications	ΔCn	Area	(Medium+Heavy)/Light	(Medium+Heavy)/Light Count	(Medium+Heavy)/Light Variability [%]	q-Value	PEP	IonScore	Exp Value	Charge	MH+ [Da]	ΔM [ppm]	RT [min]	# Missed Cleavages
	High	ITQYLDAGGIPR	1	1	1	Q9UQM7		0	25256012				0	4.012e-06	61.35	8.79389e-06	2	1303.7	-0.0339404	58.7379	0
	High	GAILTTmLATR	2	3	1	Q9UQM7	M7(Oxidation)	0	2.81676e+07	0.873189	1		0	1.948e-06	41.2	0.0012782	2	1163.65	1.13243	55.0498	0
P17600	Synapsin-1 OS=Homo sapiens GN=SYN1 PE=1 SV=3 - [SYN1_HUMAN]	91.3733	2.98	1	2	2	3	1.90352e+07	0.459333	1		705	74.0656	9.83252
	A2	Sequence	# PSMs	# Proteins	# Protein Groups	Protein Group Accessions	Modifications	ΔCn	Area	(Medium+Heavy)/Light	(Medium+Heavy)/Light Count	(Medium+Heavy)/Light Variability [%]	q-Value	PEP	IonScore	Exp Value	Charge	MH+ [Da]	ΔM [ppm]	RT [min]	# Missed Cleavages
	High	QTSVSGPAPPK	1	1	1	P17600		0	33105384	0.459333	1		0	1.912e-05	50.21	0.000144349	2	1068.57	0.758178	32.9461	0
	High	QASQAGPVPR	2	1	1	P17600		0	4.965e+06				0	3.483e-06	36.49	0.00378094	2	1010.54	0.127784	31.2209	0
P28482	Mitogen-activated protein kinase 1 OS=Homo sapiens GN=MAPK1 PE=1 SV=3 - [MK01_HUMAN]	88.98	2.5	1	1	1	4	917394	0.529092	1		360	41.3632	6.97607
	A2	Sequence	# PSMs	# Proteins	# Protein Groups	Protein Group Accessions	Modifications	ΔCn	Area	(Medium+Heavy)/Light	(Medium+Heavy)/Light Count	(Medium+Heavy)/Light Variability [%]	q-Value	PEP	IonScore	Exp Value	Charge	MH+ [Da]	ΔM [ppm]	RT [min]	# Missed Cleavages
	High	GQVFDVGPR	4	1	1	P28482		0	917394	0.529092	1		0	0.006022	37.12	0.00275606	2	974.506	0.206805	50.2087	0
P13645	Keratin, type I cytoskeletal 10 OS=Homo sapiens GN=KRT10 PE=1 SV=6 - [K1C10_HUMAN]	86.05	2.4	1	1	1	3	2.60639e+06	0.534848	1		584	58.7917	5.21143
	A2	Sequence	# PSMs	# Proteins	# Protein Groups	Protein Group Accessions	Modifications	ΔCn	Area	(Medium+Heavy)/Light	(Medium+Heavy)/Light Count	(Medium+Heavy)/Light Variability [%]	q-Value	PEP	IonScore	Exp Value	Charge	MH+ [Da]	ΔM [ppm]	RT [min]	# Missed Cleavages
	High	SLLEGEGSSGGGGR	3	1	1	P13645		0	2.60639e+06	0.534848	1		0	3.16e-06	71.14	6.4607e-07	2	1262.6	-0.96344	40.8527	0
P68104	Elongation factor 1-alpha 1 OS=Homo sapiens GN=EEF1A1 PE=1 SV=1 - [EF1A1_HUMAN]	81.5186	4.33	3	2	2	5	2.32673e+07	0.282076	1		462	50.1091	9.01221
	A2	Sequence	# PSMs	# Proteins	# Protein Groups	Protein Group Accessions	Modifications	ΔCn	Area	(Medium+Heavy)/Light	(Medium+Heavy)/Light Count	(Medium+Heavy)/Light Variability [%]	q-Value	PEP	IonScore	Exp Value	Charge	MH+ [Da]	ΔM [ppm]	RT [min]	# Missed Cleavages
	High	IGGIGTVPVGR	4	3	1	P68104		0	5.62322e+06	0.282076	1		0	0.0008261	47.16	0.000103847	2	1025.61	0.00564633	52.862	0
	High	QTVAVGVIK	1	3	1	P68104		0	40911315				0	0.002861	18.3	0.0835696	2	914.567	0.0797102	46.9139	0
P69905	Hemoglobin subunit alpha OS=Homo sapiens GN=HBA1 PE=1 SV=2 - [HBA_HUMAN]	75.6912	11.27	1	2	2	5	1.37813e+07	0.884205	1		142	15.2479	8.67529
	A2	Sequence	# PSMs	# Proteins	# Protein Groups	Protein Group Accessions	Modifications	ΔCn	Area	(Medium+Heavy)/Light	(Medium+Heavy)/Light Count	(Medium+Heavy)/Light Variability [%]	q-Value	PEP	IonScore	Exp Value	Charge	MH+ [Da]	ΔM [ppm]	RT [min]	# Missed Cleavages
	High	VLSPADk	4	1	1	P69905	C-Term(Label:18O(1))	0	4.74509e+06				0.002	0.006027	40.74	0.00144632	2	731.418	-0.881975	29.1534	0
	Medium	mFLSFPTTk	1	1	1	P69905	M1(Oxidation); C-Term(Label:18O(1))	0	2.28176e+07	0.884205	1		0.013	0.09199	20.17	0.137991	2	1089.55	0.646611	65.4884	0
P46459	Vesicle-fusing ATPase OS=Homo sapiens GN=NSF PE=1 SV=3 - [NSF_HUMAN]	74.61	4.44	1	3	3	4	5.53941e+06	1.24635	1		744	82.5421	6.94678
	A2	Sequence	# PSMs	# Proteins	# Protein Groups	Protein Group Accessions	Modifications	ΔCn	Area	(Medium+Heavy)/Light	(Medium+Heavy)/Light Count	(Medium+Heavy)/Light Variability [%]	q-Value	PEP	IonScore	Exp Value	Charge	MH+ [Da]	ΔM [ppm]	RT [min]	# Missed Cleavages
	High	NFSGAELEGLVR	1	1	1	P46459		0	4.24671e+06				0	1.435e-05	43.56	0.00065863	2	1291.67	1.09443	68.7009	0
	High	VLDDGELLVQQTK	2	1	1	P46459		0	6.83211e+06	1.24635	1		0	0.001105	29.21	0.0147538	2	1457.78	-1.14195	58.8146	0
	High	AESLQVTR	1	1	1	P46459		0	0				0.002	0.006675	18.31	0.269316	2	903.488	-1.5912	37.0345	0
Q00839	Heterogeneous nuclear ribonucleoprotein U OS=Homo sapiens GN=HNRNPU PE=1 SV=6 - [HNRPU_HUMAN]	72	4	1	2	2	2	7.07378e+06	0.539519	2	3.94559	825	90.528	5.99854
	A2	Sequence	# PSMs	# Proteins	# Protein Groups	Protein Group Accessions	Modifications	ΔCn	Area	(Medium+Heavy)/Light	(Medium+Heavy)/Light Count	(Medium+Heavy)/Light Variability [%]	q-Value	PEP	IonScore	Exp Value	Charge	MH+ [Da]	ΔM [ppm]	RT [min]	# Missed Cleavages
	High	SSGPTSLFAVTVAPPGAR	1	1	1	Q00839		0	1.05443e+07	0.554064	1		0	4.366e-05	56.65	2.11946e-05	2	1714.91	-0.184497	71.7622	0
	High	NFILDQTNVSAAAQR	1	1	1	Q00839		0	3.60327e+06	0.525356	1		0.005	0.03085	30.85	0.0127036	2	1647.85	3.20783	61.5994	0
P21281	V-type proton ATPase subunit B, brain isoform OS=Homo sapiens GN=ATP6V1B2 PE=1 SV=3 - [VATB2_HUMAN]	70.5852	6.65	1	3	3	7	3.82245e+06	1.30293	3	36.8446	511	56.4649	5.80811
	A2	Sequence	# PSMs	# Proteins	# Protein Groups	Protein Group Accessions	Modifications	ΔCn	Area	(Medium+Heavy)/Light	(Medium+Heavy)/Light Count	(Medium+Heavy)/Light Variability [%]	q-Value	PEP	IonScore	Exp Value	Charge	MH+ [Da]	ΔM [ppm]	RT [min]	# Missed Cleavages
	High	SGQVLEVSGSK	2	1	1	P21281		0	6.75749e+06				0	7.694e-05	35.77	0.00517782	2	1090.57	-0.8121	38.9841	0
	High	EQALAVSR	3	1	1	P21281		0	590940	0.691869	1		0.002	0.008591	23.92	0.0583932	2	873.477	-1.85444	35.6016	0
	High	AVVQVFEGTSGIDAK	2	1	1	P21281		0	4.11892e+06	1.46953	2	17.9821	0.005	0.0444	29.89	0.0133848	2	1520.79	-0.643109	62.1393	0
P07900	Heat shock protein HSP 90-alpha OS=Homo sapiens GN=HSP90AA1 PE=1 SV=5 - [HS90A_HUMAN]	70.22	5.33	3	3	4	7	1.00905e+07	0.747779	1		732	84.6067	5.021
	A2	Sequence	# PSMs	# Proteins	# Protein Groups	Protein Group Accessions	Modifications	ΔCn	Area	(Medium+Heavy)/Light	(Medium+Heavy)/Light Count	(Medium+Heavy)/Light Variability [%]	q-Value	PEP	IonScore	Exp Value	Charge	MH+ [Da]	ΔM [ppm]	RT [min]	# Missed Cleavages
	High	DQVANSAFVER	2	1	1	P07900		0	2.06516e+07	0.747779	1		0	2.64e-05	42.09	0.000812692	2	1235.6	-0.0512071	44.8523	0
	High	GVVDSEDLPLNISR	1	3	2	P07900;P08238		0	3.14402e+06				0.002	0.006022	26	0.0330313	2	1513.79	0.69327	65.2474	0
	High	ALLFVPR	2	2	1	P07900		0	6.47597e+06				0.002	0.008525	13.62	0.397577	2	815.513	-0.88555	66.6932	0
	High	TLVSVTK	1	1	1	P07900		0	0				0.004	0.02541	17.08	0.401563	2	747.461	-0.250497	39.3967	0
	Medium	DQVANSAFVEr	1	1	1	P07900	C-Term(Label:18O(1))	0	7611414				0.024	0.1468	13.68	0.578541	2	1237.61	-0.621549	44.2978	0
P43243	Matrin-3 OS=Homo sapiens GN=MATR3 PE=1 SV=2 - [MATR3_HUMAN]	67.57	3.66	1	3	3	4	810493				847	94.5648	6.25244
	A2	Sequence	# PSMs	# Proteins	# Protein Groups	Protein Group Accessions	Modifications	ΔCn	Area	(Medium+Heavy)/Light	(Medium+Heavy)/Light Count	(Medium+Heavy)/Light Variability [%]	q-Value	PEP	IonScore	Exp Value	Charge	MH+ [Da]	ΔM [ppm]	RT [min]	# Missed Cleavages
	High	GPGPLQER	2	1	1	P43243		0	587382				0	0.0008601	32.81	0.00929391	2	853.454	1.20758	36.4914	0
	High	GNLGAGNGNLQGPR	1	1	1	P43243		0	1.0336e+06				0.002	0.006022	33.63	0.00680612	2	1324.67	1.63393	39.5401	0
	High	SFQQSSLSR	1	1	1	P43243		0	0				0.002	0.006022	21.75	0.0982466	2	1039.52	3.20901	38.3151	0
P05129	Protein kinase C gamma type OS=Homo sapiens GN=PRKCG PE=1 SV=3 - [KPCG_HUMAN]	64.8433	3.3	1	2	2	3	1.75472e+07	0.5182	1		697	78.3972	7.45947
	A2	Sequence	# PSMs	# Proteins	# Protein Groups	Protein Group Accessions	Modifications	ΔCn	Area	(Medium+Heavy)/Light	(Medium+Heavy)/Light Count	(Medium+Heavy)/Light Variability [%]	q-Value	PEP	IonScore	Exp Value	Charge	MH+ [Da]	ΔM [ppm]	RT [min]	# Missed Cleavages
	High	LGSGPDGEPTIR	2	1	1	P05129		0	8.95407e+06	0.5182	1		0	2.253e-05	42.78	0.000843568	2	1198.61	0.0496751	43.6484	0
	High	SPTSPVPVPVm	1	1	1	P05129	M11(Oxidation)	0	26140418				0.002	0.006022	22.81	0.0874413	2	1126.58	0.98418	55.1854	0
Q07020	60S ribosomal protein L18 OS=Homo sapiens GN=RPL18 PE=1 SV=2 - [RL18_HUMAN]	64.02	6.91	1	1	1	2	4.73397e+06				188	21.6211	11.7222
	A2	Sequence	# PSMs	# Proteins	# Protein Groups	Protein Group Accessions	Modifications	ΔCn	Area	(Medium+Heavy)/Light	(Medium+Heavy)/Light Count	(Medium+Heavy)/Light Variability [%]	q-Value	PEP	IonScore	Exp Value	Charge	MH+ [Da]	ΔM [ppm]	RT [min]	# Missed Cleavages
	High	TAVVVGTITDDVR	2	1	1	Q07020		0	4.73397e+06				0	7.074e-05	50.82	0.000106391	2	1345.73	0.985936	58.9061	0
P11488	Guanine nucleotide-binding protein G(t) subunit alpha-1 OS=Homo sapiens GN=GNAT1 PE=1 SV=5 - [GNAT1_HUMAN]	62.6033	3.14	12	1	1	2	19347426				350	40.015	5.61768
	A2	Sequence	# PSMs	# Proteins	# Protein Groups	Protein Group Accessions	Modifications	ΔCn	Area	(Medium+Heavy)/Light	(Medium+Heavy)/Light Count	(Medium+Heavy)/Light Variability [%]	q-Value	PEP	IonScore	Exp Value	Charge	MH+ [Da]	ΔM [ppm]	RT [min]	# Missed Cleavages
	High	LLLLGAGESGK	2	12	1	P11488		0	19347426				0	1.842e-07	42.61	0.000392018	2	1057.63	1.30785	61.6812	0
P68366	Tubulin alpha-4A chain OS=Homo sapiens GN=TUBA4A PE=1 SV=1 - [TBA4A_HUMAN]	60.06	3.79	1	1	2	3	1.30422e+07				448	49.8924	5.05908
	A2	Sequence	# PSMs	# Proteins	# Protein Groups	Protein Group Accessions	Modifications	ΔCn	Area	(Medium+Heavy)/Light	(Medium+Heavy)/Light Count	(Medium+Heavy)/Light Variability [%]	q-Value	PEP	IonScore	Exp Value	Charge	MH+ [Da]	ΔM [ppm]	RT [min]	# Missed Cleavages
	High	DVNAAIAAIK	2	1	1	P68366		0	23243063				0	0.0004369	38.74	0.00104923	2	985.568	0.685568	55.6818	0
	Medium	FDLmYAk	1	6	2	Q9BQE3;P68366	M4(Oxidation); C-Term(Label:18O(1))	0	2.84137e+06				0.024	0.1684	15.01	0.29026	2	905.433	0.345124	53.6772	0
Q01082	Spectrin beta chain, non-erythrocytic 1 OS=Homo sapiens GN=SPTBN1 PE=1 SV=2 - [SPTB2_HUMAN]	57.2734	1.18	1	3	3	3	4.17444e+06	1.17778	2	61.0903	2364	274.439	5.56689
	A2	Sequence	# PSMs	# Proteins	# Protein Groups	Protein Group Accessions	Modifications	ΔCn	Area	(Medium+Heavy)/Light	(Medium+Heavy)/Light Count	(Medium+Heavy)/Light Variability [%]	q-Value	PEP	IonScore	Exp Value	Charge	MH+ [Da]	ΔM [ppm]	RT [min]	# Missed Cleavages
	High	VAVVNQIAR	1	1	1	Q01082		0	4.81242e+06	0.805566	1		0	3.426e-05	44.76	0.000101929	2	969.584	0.179231	45.4615	0
	High	DQNTVETLQR	1	1	1	Q01082		0	3.53647e+06	1.72199	1		0	4.196e-06	28.44	0.0204087	2	1203.6	1.24351	38.301	0
	Medium	VQAVVAVAR	1	1	1	Q01082		0	0				0.012	0.07299	15.11	0.0801629	2	912.562	-0.371347	42.5607	0
P60174	Triosephosphate isomerase OS=Homo sapiens GN=TPI1 PE=1 SV=3 - [TPIS_HUMAN]	55.4	4.2	1	1	1	1	3.64806e+06				286	30.7717	5.92236
	A2	Sequence	# PSMs	# Proteins	# Protein Groups	Protein Group Accessions	Modifications	ΔCn	Area	(Medium+Heavy)/Light	(Medium+Heavy)/Light Count	(Medium+Heavy)/Light Variability [%]	q-Value	PEP	IonScore	Exp Value	Charge	MH+ [Da]	ΔM [ppm]	RT [min]	# Missed Cleavages
	High	SNVSDAVAQSTR	1	1	1	P60174		0	3.64806e+06				0	0.0005446	55.4	3.08591e-05	2	1234.6	-0.33781	37.8357	0
P16520	Guanine nucleotide-binding protein G(I)/G(S)/G(T) subunit beta-3 OS=Homo sapiens GN=GNB3 PE=1 SV=1 - [GBB3_HUMAN]	52.84	2.94	4	1	1	2					340	37.1969	5.66846
	A2	Sequence	# PSMs	# Proteins	# Protein Groups	Protein Group Accessions	Modifications	ΔCn	Area	(Medium+Heavy)/Light	(Medium+Heavy)/Light Count	(Medium+Heavy)/Light Variability [%]	q-Value	PEP	IonScore	Exp Value	Charge	MH+ [Da]	ΔM [ppm]	RT [min]	# Missed Cleavages
	High	LLVSASQDGK	2	4	1	P16520		0	0				0.002	0.006022	37.97	0.0024018	2	1017.56	-0.00843595	38.7645	0
P07197	Neurofilament medium polypeptide OS=Homo sapiens GN=NEFM PE=1 SV=3 - [NFM_HUMAN]	52.55	2.84	1	2	3	4	4.07442e+06	0.475928	1		916	102.411	4.90674
	A2	Sequence	# PSMs	# Proteins	# Protein Groups	Protein Group Accessions	Modifications	ΔCn	Area	(Medium+Heavy)/Light	(Medium+Heavy)/Light Count	(Medium+Heavy)/Light Variability [%]	q-Value	PEP	IonScore	Exp Value	Charge	MH+ [Da]	ΔM [ppm]	RT [min]	# Missed Cleavages
	High	VSGSPSSGFR	2	1	1	P07197		0	6.53297e+06	0.475928	1		0	1.812e-07	52.55	7.50471e-05	2	980.48	0.217916	35.9287	0
	High	LLEGEETR	1	3	3	Q16352;P07196;P07197		0	0				0.004	0.01082	17.22	0.252262	2	946.485	0.650237	35.6247	0
	High	QLSDIEER	1	1	1	P07197		0	1.61587e+06				0.004	0.01064	15.42	0.305738	2	989.491	0.671875	38.9995	0
P0CG48	Polyubiquitin-C OS=Homo sapiens GN=UBC PE=1 SV=3 - [UBC_HUMAN]	51.2133	28.91	4	2	2	3	2.97879e+07	0.460865	1		685	76.9915	7.66455
	A2	Sequence	# PSMs	# Proteins	# Protein Groups	Protein Group Accessions	Modifications	ΔCn	Area	(Medium+Heavy)/Light	(Medium+Heavy)/Light Count	(Medium+Heavy)/Light Variability [%]	q-Value	PEP	IonScore	Exp Value	Charge	MH+ [Da]	ΔM [ppm]	RT [min]	# Missed Cleavages
	High	TITLEVEPSDTIENVK	1	4	1	P0CG48		0	2.97879e+07	0.460865	1		0	4.015e-07	46.99	0.000249983	2	1787.93	-0.322099	65.3006	0
	High	QLEDGR	2	4	1	P0CG48		0	0				0.004	0.02477	16.79	0.157058	2	717.353	0.618444	21.9912	0
Q08209	Serine/threonine-protein phosphatase 2B catalytic subunit alpha isoform OS=Homo sapiens GN=PPP3CA PE=1 SV=1 - [PP2BA_HUMAN]	50.6742	4.8	1	2	2	2	8.19322e+06	1.17433	2	43.2892	521	58.6503	5.85889
	A2	Sequence	# PSMs	# Proteins	# Protein Groups	Protein Group Accessions	Modifications	ΔCn	Area	(Medium+Heavy)/Light	(Medium+Heavy)/Light Count	(Medium+Heavy)/Light Variability [%]	q-Value	PEP	IonScore	Exp Value	Charge	MH+ [Da]	ΔM [ppm]	RT [min]	# Missed Cleavages
	High	LEESVALR	1	1	1	Q08209		0	5.47988e+06	1.55308	1		0.002	0.006022	39.32	0.0016373	2	916.511	0.93556	45.1305	0
	High	GLTPTGmLPSGVLSGGK	1	1	1	Q08209	M7(Oxidation)	0	1.09066e+07	0.887952	1		0.002	0.006022	30.59	0.0101265	2	1587.84	0.503982	62.7734	0
P14618	Pyruvate kinase isozymes M1/M2 OS=Homo sapiens GN=PKM PE=1 SV=4 - [KPYM_HUMAN]	50.66	3.77	2	2	2	2	1.24703e+07	1.00163	2	5.65068	531	57.9	7.84033
	A2	Sequence	# PSMs	# Proteins	# Protein Groups	Protein Group Accessions	Modifications	ΔCn	Area	(Medium+Heavy)/Light	(Medium+Heavy)/Light Count	(Medium+Heavy)/Light Variability [%]	q-Value	PEP	IonScore	Exp Value	Charge	MH+ [Da]	ΔM [ppm]	RT [min]	# Missed Cleavages
	High	VNFAmNVGK	1	1	1	P14618	M5(Oxidation)	0	15594265	0.964199	1		0	0.0002814	48.01	0.000235606	2	995.498	-0.147667	43.6753	0
	High	GDLGIEIPAEK	1	2	1	P14618		0	9.34624e+06	1.04051	1		0	0.006022	18.15	0.191386	2	1141.61	2.27321	60.2589	0
Q8N163	DBIRD complex subunit KIAA1967 OS=Homo sapiens GN=KIAA1967 PE=1 SV=2 - [K1967_HUMAN]	49.71	0.98	1	1	1	1	1.71214e+06				923	102.838	5.22412
	A2	Sequence	# PSMs	# Proteins	# Protein Groups	Protein Group Accessions	Modifications	ΔCn	Area	(Medium+Heavy)/Light	(Medium+Heavy)/Light Count	(Medium+Heavy)/Light Variability [%]	q-Value	PEP	IonScore	Exp Value	Charge	MH+ [Da]	ΔM [ppm]	RT [min]	# Missed Cleavages
	High	LAEAEETAR	1	1	1	Q8N163		0	1.71214e+06				0	7.274e-05	49.71	0.000113854	2	989.49	0.106619	29.6912	0
P36578	60S ribosomal protein L4 OS=Homo sapiens GN=RPL4 PE=1 SV=5 - [RL4_HUMAN]	48.7	2.58	1	1	1	2	1.06816e+07				427	47.6674	11.063
	A2	Sequence	# PSMs	# Proteins	# Protein Groups	Protein Group Accessions	Modifications	ΔCn	Area	(Medium+Heavy)/Light	(Medium+Heavy)/Light Count	(Medium+Heavy)/Light Variability [%]	q-Value	PEP	IonScore	Exp Value	Charge	MH+ [Da]	ΔM [ppm]	RT [min]	# Missed Cleavages
	High	AAAAAAALQAK	2	1	1	P36578		0	1.06816e+07				0	3.382e-12	44.19	0.000310569	2	956.553	0.568478	36.9713	0
P00403	Cytochrome c oxidase subunit 2 OS=Homo sapiens GN=MT-CO2 PE=1 SV=1 - [COX2_HUMAN]	48.405	10.57	1	3	3	4	1.66949e+07	0.389003	1		227	25.5482	4.81787
	A2	Sequence	# PSMs	# Proteins	# Protein Groups	Protein Group Accessions	Modifications	ΔCn	Area	(Medium+Heavy)/Light	(Medium+Heavy)/Light Count	(Medium+Heavy)/Light Variability [%]	q-Value	PEP	IonScore	Exp Value	Charge	MH+ [Da]	ΔM [ppm]	RT [min]	# Missed Cleavages
	High	VVLPIEAPIR	2	1	1	P00403		0	22012590				0.002	0.006022	30.81	0.000827885	2	1106.69	0.563801	68.5186	0
	High	LLDVDNR	1	1	1	P00403		0	0				0.004	0.01961	35.84	0.00367468	2	844.452	-0.472975	42.4938	0
	High	TDAIPGR	1	1	1	P00403		0	1.13773e+07	0.389003	1		0.004	0.02384	16.09	0.274331	2	729.389	0.590351	32.0028	0
P08238	Heat shock protein HSP 90-beta OS=Homo sapiens GN=HSP90AB1 PE=1 SV=4 - [HS90B_HUMAN]	47.98	3.45	3	1	2	2	5.31282e+06	0.235686	1		724	83.2121	5.03369
	A2	Sequence	# PSMs	# Proteins	# Protein Groups	Protein Group Accessions	Modifications	ΔCn	Area	(Medium+Heavy)/Light	(Medium+Heavy)/Light Count	(Medium+Heavy)/Light Variability [%]	q-Value	PEP	IonScore	Exp Value	Charge	MH+ [Da]	ΔM [ppm]	RT [min]	# Missed Cleavages
	High	EQVANSAFVER	1	2	1	P08238		0	7.48161e+06	0.235686	1		0	0.002024	36.48	0.00314868	2	1249.62	0.71085	44.5789	0
	High	GVVDSEDLPLNISR	1	3	2	P07900;P08238		0	3.14402e+06				0.002	0.006022	26	0.0330313	2	1513.79	0.69327	65.2474	0
P38646	Stress-70 protein, mitochondrial OS=Homo sapiens GN=HSPA9 PE=1 SV=2 - [GRP75_HUMAN]	47.74	2.36	1	1	2	2	2.86036e+06	0.46513	1		679	73.6348	6.16357
	A2	Sequence	# PSMs	# Proteins	# Protein Groups	Protein Group Accessions	Modifications	ΔCn	Area	(Medium+Heavy)/Light	(Medium+Heavy)/Light Count	(Medium+Heavy)/Light Variability [%]	q-Value	PEP	IonScore	Exp Value	Charge	MH+ [Da]	ΔM [ppm]	RT [min]	# Missed Cleavages
	High	VLENAEGAR	1	1	1	P38646		0	2.86036e+06	0.46513	1		0	1.53e-06	47.74	0.000159854	2	958.498	2.4788	31.2746	0
	Medium	NTTIPTK	1	3	2	P11142;P38646		0	0				0.024	0.1326	19.81	0.243942	2	774.436	0.122985	29.2804	0
P10809	60 kDa heat shock protein, mitochondrial OS=Homo sapiens GN=HSPD1 PE=1 SV=2 - [CH60_HUMAN]	46.97	1.57	1	1	1	2	9.42089e+06	0.225813	1		573	61.0164	5.87158
	A2	Sequence	# PSMs	# Proteins	# Protein Groups	Protein Group Accessions	Modifications	ΔCn	Area	(Medium+Heavy)/Light	(Medium+Heavy)/Light Count	(Medium+Heavy)/Light Variability [%]	q-Value	PEP	IonScore	Exp Value	Charge	MH+ [Da]	ΔM [ppm]	RT [min]	# Missed Cleavages
	High	VTDALNATR	2	1	1	P10809		0	9.42089e+06	0.225813	1		0	3.29e-05	40.93	0.00134001	2	960.512	0.615201	36.4073	0
Q9H1K4	Mitochondrial glutamate carrier 2 OS=Homo sapiens GN=SLC25A18 PE=2 SV=1 - [GHC2_HUMAN]	46.7334	2.54	2	1	1	3	10023653				315	33.8265	9.24658
	A2	Sequence	# PSMs	# Proteins	# Protein Groups	Protein Group Accessions	Modifications	ΔCn	Area	(Medium+Heavy)/Light	(Medium+Heavy)/Light Count	(Medium+Heavy)/Light Variability [%]	q-Value	PEP	IonScore	Exp Value	Charge	MH+ [Da]	ΔM [ppm]	RT [min]	# Missed Cleavages
	High	IQLQDAGR	3	2	1	Q9H1K4		0	10023653				0.002	0.006084	36.49	0.00227754	2	900.49	0.330451	38.5424	0
P62917	60S ribosomal protein L8 OS=Homo sapiens GN=RPL8 PE=1 SV=2 - [RL8_HUMAN]	43.67	4.28	1	1	1	1	1.645e+06				257	28.0073	11.0337
	A2	Sequence	# PSMs	# Proteins	# Protein Groups	Protein Group Accessions	Modifications	ΔCn	Area	(Medium+Heavy)/Light	(Medium+Heavy)/Light Count	(Medium+Heavy)/Light Variability [%]	q-Value	PEP	IonScore	Exp Value	Charge	MH+ [Da]	ΔM [ppm]	RT [min]	# Missed Cleavages
	High	AVVGVVAGGGR	1	1	1	P62917		0	1.645e+06				0	0.003435	43.67	0.000216916	2	941.551	-1.469	41.0231	0
P23246	Splicing factor, proline- and glutamine-rich OS=Homo sapiens GN=SFPQ PE=1 SV=2 - [SFPQ_HUMAN]	42.84	3.25	2	2	2	2	5530274	0.614444	1		707	76.1016	9.43701
	A2	Sequence	# PSMs	# Proteins	# Protein Groups	Protein Group Accessions	Modifications	ΔCn	Area	(Medium+Heavy)/Light	(Medium+Heavy)/Light Count	(Medium+Heavy)/Light Variability [%]	q-Value	PEP	IonScore	Exp Value	Charge	MH+ [Da]	ΔM [ppm]	RT [min]	# Missed Cleavages
	High	FGQGGAGPVGGQGPR	1	1	1	P23246		0	4.3646e+06	0.614444	1		0.002	0.006566	24.38	0.0527069	2	1341.67	-0.614638	41.1122	0
	High	AVVIVDDR	1	2	1	P23246		0	6.69595e+06				0.004	0.02062	35.96	0.00339707	2	886.502	3.1026	43.3132	0
P50993	Sodium/potassium-transporting ATPase subunit alpha-2 OS=Homo sapiens GN=ATP1A2 PE=1 SV=1 - [AT1A2_HUMAN]	42.4616	3.53	1	1	3	3	1.00203e+07				1020	112.193	5.65576
	A2	Sequence	# PSMs	# Proteins	# Protein Groups	Protein Group Accessions	Modifications	ΔCn	Area	(Medium+Heavy)/Light	(Medium+Heavy)/Light Count	(Medium+Heavy)/Light Variability [%]	q-Value	PEP	IonScore	Exp Value	Charge	MH+ [Da]	ΔM [ppm]	RT [min]	# Missed Cleavages
	High	GVGIISEGNETVEDIAAR	1	3	2	P13637;P50993		0	7.52e+06				0	2.374e-07	28.24	0.0169464	2	1829.92	-2.63085	67.1885	0
	High	GIVIATGDR	1	1	1	P50993		0	2839993				0.004	0.00959	33.73	0.00658765	2	901.509	-1.59252	44.4247	0
	High	AAVPDAVGK	1	3	2	P13637;P50993		0	1.97009e+07				0.004	0.01854	17.11	0.185782	2	827.461	-1.54356	35.5714	0
P61313	60S ribosomal protein L15 OS=Homo sapiens GN=RPL15 PE=1 SV=2 - [RL15_HUMAN]	42.42	4.41	1	1	1	2	6.84465e+06				204	24.1311	11.6196
	A2	Sequence	# PSMs	# Proteins	# Protein Groups	Protein Group Accessions	Modifications	ΔCn	Area	(Medium+Heavy)/Light	(Medium+Heavy)/Light Count	(Medium+Heavy)/Light Variability [%]	q-Value	PEP	IonScore	Exp Value	Charge	MH+ [Da]	ΔM [ppm]	RT [min]	# Missed Cleavages
	High	SLQSVAEER	2	1	1	P61313		0	6.84465e+06				0	0.0007256	42.42	0.000715995	2	1018.52	0.233537	41.7695	0
Q8NFW8	N-acylneuraminate cytidylyltransferase OS=Homo sapiens GN=CMAS PE=1 SV=2 - [NEUA_HUMAN]	42.26	2.3	1	1	1	2	1.04537e+06				434	48.3487	7.92822
	A2	Sequence	# PSMs	# Proteins	# Protein Groups	Protein Group Accessions	Modifications	ΔCn	Area	(Medium+Heavy)/Light	(Medium+Heavy)/Light Count	(Medium+Heavy)/Light Variability [%]	q-Value	PEP	IonScore	Exp Value	Charge	MH+ [Da]	ΔM [ppm]	RT [min]	# Missed Cleavages
	High	GAATSVSNPR	2	1	1	Q8NFW8		0	1.04537e+06				0	0.003278	32.85	0.00780794	2	959.49	-0.895974	26.3471	0
P00505	Aspartate aminotransferase, mitochondrial OS=Homo sapiens GN=GOT2 PE=1 SV=3 - [AATM_HUMAN]	42	10.47	1	4	4	4	2.94683e+06	0.620225	2	39.3266	430	47.4873	9.01221
	A2	Sequence	# PSMs	# Proteins	# Protein Groups	Protein Group Accessions	Modifications	ΔCn	Area	(Medium+Heavy)/Light	(Medium+Heavy)/Light Count	(Medium+Heavy)/Light Variability [%]	q-Value	PEP	IonScore	Exp Value	Charge	MH+ [Da]	ΔM [ppm]	RT [min]	# Missed Cleavages
	High	FVTVQTISGTGALR	1	1	1	P00505		0	694282				0	0.0005021	31.25	0.00693652	2	1449.81	-0.24806	63.4929	0
	High	IAAAILNTPDLR	1	1	1	P00505		0	6.4608e+06	0.480249	1		0.002	0.00656	24.62	0.0177749	2	1267.74	0.717236	64.3759	0
	High	DAGmQLQGYr	1	1	1	P00505	M4(Oxidation); C-Term(Label:18O(1))	0	1.68542e+06	0.800998	1		0.002	0.006022	13.54	0.32309	2	1156.53	-3.36316	39.4275	0
	High	KAEAQIAAK	1	1	1	P00505		0	0				0.009	0.06293	13.09	0.490908	2	929.541	-0.0880706	32.9445	1
P61158	Actin-related protein 3 OS=Homo sapiens GN=ACTR3 PE=1 SV=3 - [ARP3_HUMAN]	41.17	2.15	2	1	1	1	1.22141e+06				418	47.341	5.88428
	A2	Sequence	# PSMs	# Proteins	# Protein Groups	Protein Group Accessions	Modifications	ΔCn	Area	(Medium+Heavy)/Light	(Medium+Heavy)/Light Count	(Medium+Heavy)/Light Variability [%]	q-Value	PEP	IonScore	Exp Value	Charge	MH+ [Da]	ΔM [ppm]	RT [min]	# Missed Cleavages
	High	LSEELSGGR	1	2	1	P61158		0	1.22141e+06				0	9.682e-06	41.17	0.00114957	2	947.476	-3.16248	36.8618	0
Q16720	Plasma membrane calcium-transporting ATPase 3 OS=Homo sapiens GN=ATP2B3 PE=1 SV=3 - [AT2B3_HUMAN]	40.9067	2.3	4	2	2	3	8.42553e+06	0.897272	1		1220	134.112	5.61768
	A2	Sequence	# PSMs	# Proteins	# Protein Groups	Protein Group Accessions	Modifications	ΔCn	Area	(Medium+Heavy)/Light	(Medium+Heavy)/Light Count	(Medium+Heavy)/Light Variability [%]	q-Value	PEP	IonScore	Exp Value	Charge	MH+ [Da]	ΔM [ppm]	RT [min]	# Missed Cleavages
	High	mVTGDNINTAR	2	4	1	Q16720	M1(Oxidation)	0	1.66477e+07	0.897272	1		0.002	0.006209	29.92	0.0101859	2	1207.57	-0.0764948	34.0411	0
	Medium	QVVAVTGDGTNDGPALK	1	4	1	Q16720		0	203318				0.03	0.2058	15.31	0.360692	2	1641.85	0.864529	48.6839	0
P07195	L-lactate dehydrogenase B chain OS=Homo sapiens GN=LDHB PE=1 SV=2 - [LDHB_HUMAN]	40.47	2.69	1	1	1	2	3.90303e+06	1.15129	1		334	36.6151	6.04932
	A2	Sequence	# PSMs	# Proteins	# Protein Groups	Protein Group Accessions	Modifications	ΔCn	Area	(Medium+Heavy)/Light	(Medium+Heavy)/Light Count	(Medium+Heavy)/Light Variability [%]	q-Value	PEP	IonScore	Exp Value	Charge	MH+ [Da]	ΔM [ppm]	RT [min]	# Missed Cleavages
	High	GLTSVINQK	2	1	1	P07195		0	3.90303e+06	1.15129	1		0	0.0005901	29.73	0.0145788	2	959.553	1.1327	47.0433	0
P08237	6-phosphofructokinase, muscle type OS=Homo sapiens GN=PFKM PE=1 SV=2 - [K6PF_HUMAN]	38.7419	2.18	3	2	2	3	1.22892e+07				780	85.1284	7.98682
	A2	Sequence	# PSMs	# Proteins	# Protein Groups	Protein Group Accessions	Modifications	ΔCn	Area	(Medium+Heavy)/Light	(Medium+Heavy)/Light Count	(Medium+Heavy)/Light Variability [%]	q-Value	PEP	IonScore	Exp Value	Charge	MH+ [Da]	ΔM [ppm]	RT [min]	# Missed Cleavages
	High	GGTPSAFDR	2	3	1	P08237		0	9.51179e+06				0.002	0.006022	25.76	0.0248206	2	907.427	0.129175	37.5528	0
	High	IGLIQGNR	1	1	1	P08237		0	1.50666e+07				0.002	0.006022	24.98	0.0177905	2	870.515	-1.20312	46.1255	0
P07910	Heterogeneous nuclear ribonucleoproteins C1/C2 OS=Homo sapiens GN=HNRNPC PE=1 SV=4 - [HNRPC_HUMAN]	38.65	5.88	3	2	2	3	9.71537e+06				306	33.6495	5.08447
	A2	Sequence	# PSMs	# Proteins	# Protein Groups	Protein Group Accessions	Modifications	ΔCn	Area	(Medium+Heavy)/Light	(Medium+Heavy)/Light Count	(Medium+Heavy)/Light Variability [%]	q-Value	PEP	IonScore	Exp Value	Charge	MH+ [Da]	ΔM [ppm]	RT [min]	# Missed Cleavages
	High	AAVAGEDGR	2	3	1	P07910		0	4.63546e+06				0.002	0.006651	38.65	0.000975677	2	845.41	-1.35972	22.3392	0
	Medium	VPPPPPIAR	1	1	1	P07910		0	14795279				0.044	0.2741	19.7	0.0739348	2	943.573	0.402942	44.5354	0
P60880	Synaptosomal-associated protein 25 OS=Homo sapiens GN=SNAP25 PE=1 SV=1 - [SNP25_HUMAN]	38.28	11.17	1	2	2	2	6.92144e+06	1.03849	1		206	23.3002	4.76709
	A2	Sequence	# PSMs	# Proteins	# Protein Groups	Protein Group Accessions	Modifications	ΔCn	Area	(Medium+Heavy)/Light	(Medium+Heavy)/Light Count	(Medium+Heavy)/Light Variability [%]	q-Value	PEP	IonScore	Exp Value	Charge	MH+ [Da]	ΔM [ppm]	RT [min]	# Missed Cleavages
	High	TLVmLDEQGEQLER	1	1	1	P60880	M4(Oxidation)	0	4.92317e+06				0.009	0.05901	38.29	0.00156406	2	1676.81	-2.60804	58.8978	0
	Medium	mLQLVEESk	1	1	1	P60880	M1(Oxidation); C-Term(Label:18O(1))	0	8.91971e+06	1.03849	1		0.013	0.07755	14.49	0.480102	2	1094.57	1.02622	46.6695	0
P12277	Creatine kinase B-type OS=Homo sapiens GN=CKB PE=1 SV=1 - [KCRB_HUMAN]	38.15	2.89	1	1	1	1	21965484				381	42.6173	5.59229
	A2	Sequence	# PSMs	# Proteins	# Protein Groups	Protein Group Accessions	Modifications	ΔCn	Area	(Medium+Heavy)/Light	(Medium+Heavy)/Light Count	(Medium+Heavy)/Light Variability [%]	q-Value	PEP	IonScore	Exp Value	Charge	MH+ [Da]	ΔM [ppm]	RT [min]	# Missed Cleavages
	High	VLTPELYAELR	1	1	1	P12277		0	21965484				0	2.081e-05	38.15	0.00139329	2	1303.73	1.08695	69.7686	0
P06744	Glucose-6-phosphate isomerase OS=Homo sapiens GN=GPI PE=1 SV=4 - [G6PI_HUMAN]	38.1157	2.51	2	2	2	2					558	63.1072	8.32373
	A2	Sequence	# PSMs	# Proteins	# Protein Groups	Protein Group Accessions	Modifications	ΔCn	Area	(Medium+Heavy)/Light	(Medium+Heavy)/Light Count	(Medium+Heavy)/Light Variability [%]	q-Value	PEP	IonScore	Exp Value	Charge	MH+ [Da]	ΔM [ppm]	RT [min]	# Missed Cleavages
	High	INYTEGR	1	1	1	P06744		0	0				0	0.001622	40.62	0.0012701	2	852.42	-1.60367	33.486	0
	High	SPEDLER	1	2	1	P06744		0	0				0.004	0.01169	16.83	0.163918	2	845.399	-1.12004	32.2866	0
P62942	Peptidyl-prolyl cis-trans isomerase FKBP1A OS=Homo sapiens GN=FKBP1A PE=1 SV=2 - [FKB1A_HUMAN]	37.91	12.04	1	1	1	1	3.68377e+06				108	11.9431	8.1626
	A2	Sequence	# PSMs	# Proteins	# Protein Groups	Protein Group Accessions	Modifications	ΔCn	Area	(Medium+Heavy)/Light	(Medium+Heavy)/Light Count	(Medium+Heavy)/Light Variability [%]	q-Value	PEP	IonScore	Exp Value	Charge	MH+ [Da]	ΔM [ppm]	RT [min]	# Missed Cleavages
	High	GVQVETISPGDGR	1	1	1	P62942		0	3.68377e+06				0	6.354e-05	37.91	0.00195788	2	1314.67	1.63424	45.0086	0
P61106	Ras-related protein Rab-14 OS=Homo sapiens GN=RAB14 PE=1 SV=4 - [RAB14_HUMAN]	37.5	4.19	1	1	1	2	7.51114e+06	0.163085	1		215	23.8819	6.21436
	A2	Sequence	# PSMs	# Proteins	# Protein Groups	Protein Group Accessions	Modifications	ΔCn	Area	(Medium+Heavy)/Light	(Medium+Heavy)/Light Count	(Medium+Heavy)/Light Variability [%]	q-Value	PEP	IonScore	Exp Value	Charge	MH+ [Da]	ΔM [ppm]	RT [min]	# Missed Cleavages
	High	LTSEPQPQR	2	1	1	P61106		0	7.51114e+06	0.163085	1		0.002	0.006022	29.16	0.0142573	2	1055.55	-0.134659	29.1761	0
P60201	Myelin proteolipid protein OS=Homo sapiens GN=PLP1 PE=1 SV=2 - [MYPR_HUMAN]	37.04	3.97	1	1	1	2	22899612	1.57961	1		277	30.0571	8.35303
	A2	Sequence	# PSMs	# Proteins	# Protein Groups	Protein Group Accessions	Modifications	ΔCn	Area	(Medium+Heavy)/Light	(Medium+Heavy)/Light Count	(Medium+Heavy)/Light Variability [%]	q-Value	PEP	IonScore	Exp Value	Charge	MH+ [Da]	ΔM [ppm]	RT [min]	# Missed Cleavages
	High	GLSATVTGGQk	2	1	1	P60201	C-Term(Label:18O(1))	0	22899612	1.57961	1		0	0.0001602	38.1	0.0024239	2	1020.56	0.784465	37.6823	0
P07339	Cathepsin D OS=Homo sapiens GN=CTSD PE=1 SV=1 - [CATD_HUMAN]	36.76	1.94	1	1	1	1	1.39776e+07	0.551016	1		412	44.5236	6.53662
	A2	Sequence	# PSMs	# Proteins	# Protein Groups	Protein Group Accessions	Modifications	ΔCn	Area	(Medium+Heavy)/Light	(Medium+Heavy)/Light Count	(Medium+Heavy)/Light Variability [%]	q-Value	PEP	IonScore	Exp Value	Charge	MH+ [Da]	ΔM [ppm]	RT [min]	# Missed Cleavages
	High	VGFAEAAR	1	1	1	P07339		0	1.39776e+07	0.551016	1		0.004	0.01059	36.76	0.0048393	2	820.431	-0.0382208	41.3024	0
O43759	Synaptogyrin-1 OS=Homo sapiens GN=SYNGR1 PE=1 SV=2 - [SNG1_HUMAN]	36.29	5.15	1	1	1	1	7019487	2.39131	1		233	25.4393	4.67822
	A2	Sequence	# PSMs	# Proteins	# Protein Groups	Protein Group Accessions	Modifications	ΔCn	Area	(Medium+Heavy)/Light	(Medium+Heavy)/Light Count	(Medium+Heavy)/Light Variability [%]	q-Value	PEP	IonScore	Exp Value	Charge	MH+ [Da]	ΔM [ppm]	RT [min]	# Missed Cleavages
	High	DNPLNEGTDAAR	1	1	1	O43759		0	7019487	2.39131	1		0	0.000856	36.29	0.00169174	2	1272.58	1.27786	39.8741	0
P18124	60S ribosomal protein L7 OS=Homo sapiens GN=RPL7 PE=1 SV=1 - [RL7_HUMAN]	35.9941	4.44	1	1	1	2	8.80325e+06				248	29.2072	10.6528
	A2	Sequence	# PSMs	# Proteins	# Protein Groups	Protein Group Accessions	Modifications	ΔCn	Area	(Medium+Heavy)/Light	(Medium+Heavy)/Light Count	(Medium+Heavy)/Light Variability [%]	q-Value	PEP	IonScore	Exp Value	Charge	MH+ [Da]	ΔM [ppm]	RT [min]	# Missed Cleavages
	High	IALTDNALIAR	2	1	1	P18124		0	8.80325e+06				0.004	0.009225	30.36	0.00483236	2	1170.69	1.01567	62.1196	0
P61604	10 kDa heat shock protein, mitochondrial OS=Homo sapiens GN=HSPE1 PE=1 SV=2 - [CH10_HUMAN]	35.17	13.73	1	1	1	1					102	10.9249	8.92432
	A2	Sequence	# PSMs	# Proteins	# Protein Groups	Protein Group Accessions	Modifications	ΔCn	Area	(Medium+Heavy)/Light	(Medium+Heavy)/Light Count	(Medium+Heavy)/Light Variability [%]	q-Value	PEP	IonScore	Exp Value	Charge	MH+ [Da]	ΔM [ppm]	RT [min]	# Missed Cleavages
	High	VLQATVVAVGSGSK	1	1	1	P61604		0	0				0	3.924e-06	35.17	0.00211342	2	1315.76	1.60982	50.6997	0
Q9NTU7	Cerebellin-4 OS=Homo sapiens GN=CBLN4 PE=1 SV=1 - [CBLN4_HUMAN]	34.92	3.48	1	1	1	1	8.41301e+06	0.0695555	1		201	21.7944	8.73389
	A2	Sequence	# PSMs	# Proteins	# Protein Groups	Protein Group Accessions	Modifications	ΔCn	Area	(Medium+Heavy)/Light	(Medium+Heavy)/Light Count	(Medium+Heavy)/Light Variability [%]	q-Value	PEP	IonScore	Exp Value	Charge	MH+ [Da]	ΔM [ppm]	RT [min]	# Missed Cleavages
	Medium	VAFSAVR	1	1	1	Q9NTU7		0	8.41301e+06	0.0695555	1		0.024	0.1589	34.92	0.00929278	2	749.431	1.1899	45.975	0
Q8TF72	Protein Shroom3 OS=Homo sapiens GN=SHROOM3 PE=1 SV=2 - [SHRM3_HUMAN]	34.84	0.45	1	1	1	2					1996	216.724	7.79639
	A2	Sequence	# PSMs	# Proteins	# Protein Groups	Protein Group Accessions	Modifications	ΔCn	Area	(Medium+Heavy)/Light	(Medium+Heavy)/Light Count	(Medium+Heavy)/Light Variability [%]	q-Value	PEP	IonScore	Exp Value	Charge	MH+ [Da]	ΔM [ppm]	RT [min]	# Missed Cleavages
	High	SSPATADKR	2	1	1	Q8TF72		0	0				0.005	0.02965	29.46	0.0151742	2	932.48	0.294588	30.9016	1
P00338	L-lactate dehydrogenase A chain OS=Homo sapiens GN=LDHA PE=1 SV=2 - [LDHA_HUMAN]	34.31	3.01	1	1	1	1	7.74593e+06	0.397832	1		332	36.6654	8.26514
	A2	Sequence	# PSMs	# Proteins	# Protein Groups	Protein Group Accessions	Modifications	ΔCn	Area	(Medium+Heavy)/Light	(Medium+Heavy)/Light Count	(Medium+Heavy)/Light Variability [%]	q-Value	PEP	IonScore	Exp Value	Charge	MH+ [Da]	ΔM [ppm]	RT [min]	# Missed Cleavages
	High	VTLTSEEEAR	1	1	1	P00338		0	7.74593e+06	0.397832	1		0	0.006022	34.31	0.00600503	2	1134.57	2.05042	39.3677	0
P10636	Microtubule-associated protein tau OS=Homo sapiens GN=MAPT PE=1 SV=5 - [TAU_HUMAN]	33.93	4.35	1	3	3	6	3.69966e+06	1.54094	1		758	78.8798	6.7124
	A2	Sequence	# PSMs	# Proteins	# Protein Groups	Protein Group Accessions	Modifications	ΔCn	Area	(Medium+Heavy)/Light	(Medium+Heavy)/Light Count	(Medium+Heavy)/Light Variability [%]	q-Value	PEP	IonScore	Exp Value	Charge	MH+ [Da]	ΔM [ppm]	RT [min]	# Missed Cleavages
	High	TPPSSGEPPK	3	1	1	P10636		0	0				0.002	0.006022	18.42	0.195677	2	996.499	-1.06123	25.5112	0
	High	SPVVSGDTSPr	1	1	1	P10636	C-Term(Label:18O(1))	0	1.31401e+06	1.54094	1		0.002	0.007628	16.13	0.285224	2	1103.56	3.76956	32.4801	0
	High	LQTAPVPmPDLK	2	1	1	P10636	M8(Oxidation)	0	6.08531e+06				0.005	0.04496	27.38	0.0257762	2	1325.71	0.000154634	53.4175	0
P32119	Peroxiredoxin-2 OS=Homo sapiens GN=PRDX2 PE=1 SV=5 - [PRDX2_HUMAN]	33.92	5.05	1	1	1	2	2.23171e+06	1.54054	1		198	21.8782	5.97314
	A2	Sequence	# PSMs	# Proteins	# Protein Groups	Protein Group Accessions	Modifications	ΔCn	Area	(Medium+Heavy)/Light	(Medium+Heavy)/Light Count	(Medium+Heavy)/Light Variability [%]	q-Value	PEP	IonScore	Exp Value	Charge	MH+ [Da]	ΔM [ppm]	RT [min]	# Missed Cleavages
	High	ATAVVDGAFk	2	1	1	P32119	C-Term(Label:18O(1))	0	2.23171e+06	1.54054	1		0.002	0.006022	18.07	0.250308	2	980.53	0.679027	46.6806	0
P55809	Succinyl-CoA:3-ketoacid coenzyme A transferase 1, mitochondrial OS=Homo sapiens GN=OXCT1 PE=1 SV=1 - [SCOT1_HUMAN]	33.84	2.5	1	1	1	1	1.79868e+06	1.5045	1		520	56.1219	7.45947
	A2	Sequence	# PSMs	# Proteins	# Protein Groups	Protein Group Accessions	Modifications	ΔCn	Area	(Medium+Heavy)/Light	(Medium+Heavy)/Light Count	(Medium+Heavy)/Light Variability [%]	q-Value	PEP	IonScore	Exp Value	Charge	MH+ [Da]	ΔM [ppm]	RT [min]	# Missed Cleavages
	High	GmGGAmDLVSSAK	1	1	1	P55809	M2(Oxidation); M6(Oxidation)	0	1.79868e+06	1.5045	1		0.002	0.006022	33.84	0.00320112	2	1255.57	1.49992	39.5763	0
P15259	Phosphoglycerate mutase 2 OS=Homo sapiens GN=PGAM2 PE=1 SV=3 - [PGAM2_HUMAN]	33.03	3.95	2	1	1	1	2.15755e+06				253	28.7478	8.88037
	A2	Sequence	# PSMs	# Proteins	# Protein Groups	Protein Group Accessions	Modifications	ΔCn	Area	(Medium+Heavy)/Light	(Medium+Heavy)/Light Count	(Medium+Heavy)/Light Variability [%]	q-Value	PEP	IonScore	Exp Value	Charge	MH+ [Da]	ΔM [ppm]	RT [min]	# Missed Cleavages
	High	AmEAVAAQGK	1	2	1	P15259	M2(Oxidation)	0	2.15755e+06				0	0.001301	33.03	0.00823755	2	991.489	1.41912	23.2826	0
Q15366	Poly(rC)-binding protein 2 OS=Homo sapiens GN=PCBP2 PE=1 SV=1 - [PCBP2_HUMAN]	32.93	3.01	1	1	1	2	6.03543e+06				365	38.5556	6.78564
	A2	Sequence	# PSMs	# Proteins	# Protein Groups	Protein Group Accessions	Modifications	ΔCn	Area	(Medium+Heavy)/Light	(Medium+Heavy)/Light Count	(Medium+Heavy)/Light Variability [%]	q-Value	PEP	IonScore	Exp Value	Charge	MH+ [Da]	ΔM [ppm]	RT [min]	# Missed Cleavages
	High	IANPVEGSTDR	2	1	1	Q15366		0	6.03543e+06				0.002	0.006022	31.28	0.00770798	2	1158.58	3.3694	39.1709	0
P62937	Peptidyl-prolyl cis-trans isomerase A OS=Homo sapiens GN=PPIA PE=1 SV=2 - [PPIA_HUMAN]	31.1902	10.3	8	2	2	2	1.3658e+06				165	18.0009	7.81104
	A2	Sequence	# PSMs	# Proteins	# Protein Groups	Protein Group Accessions	Modifications	ΔCn	Area	(Medium+Heavy)/Light	(Medium+Heavy)/Light Count	(Medium+Heavy)/Light Variability [%]	q-Value	PEP	IonScore	Exp Value	Charge	MH+ [Da]	ΔM [ppm]	RT [min]	# Missed Cleavages
	High	EGmNIVEAmER	1	1	1	P62937	M3(Oxidation); M9(Oxidation)	0	1.3658e+06				0.004	0.01783	13.73	0.146157	2	1310.57	0.263788	38.6083	0
	Medium	TAENFR	1	8	1	P62937		0	0				0.013	0.0766	36.41	0.00353125	2	737.358	0.417016	30.2241	0
Q05193	Dynamin-1 OS=Homo sapiens GN=DNM1 PE=1 SV=2 - [DYN1_HUMAN]	30.97	2.89	1	3	3	5	3.24315e+06	0.486415	3	46.445	864	97.347	7.1665
	A2	Sequence	# PSMs	# Proteins	# Protein Groups	Protein Group Accessions	Modifications	ΔCn	Area	(Medium+Heavy)/Light	(Medium+Heavy)/Light Count	(Medium+Heavy)/Light Variability [%]	q-Value	PEP	IonScore	Exp Value	Charge	MH+ [Da]	ΔM [ppm]	RT [min]	# Missed Cleavages
	High	SPTSSPTPQR	2	1	1	Q05193		0	1.35007e+06	0.419059	2	22.3707	0.002	0.006022	28.59	0.0207535	2	1057.53	1.12402	25.3494	0
	High	EVDPQGQR	2	1	1	Q05193		0	5.90146e+06				0.004	0.0133	12.75	0.517612	2	928.448	-0.176191	23.5626	0
	Medium	TIGVITK	1	1	1	Q05193		0	2.47791e+06	0.750501	1		0.024	0.1364	18.33	0.237232	2	731.467	0.545525	41.9859	0
Q08211	ATP-dependent RNA helicase A OS=Homo sapiens GN=DHX9 PE=1 SV=4 - [DHX9_HUMAN]	30.91	1.18	1	2	2	2	466901				1270	140.869	6.84424
	A2	Sequence	# PSMs	# Proteins	# Protein Groups	Protein Group Accessions	Modifications	ΔCn	Area	(Medium+Heavy)/Light	(Medium+Heavy)/Light Count	(Medium+Heavy)/Light Variability [%]	q-Value	PEP	IonScore	Exp Value	Charge	MH+ [Da]	ΔM [ppm]	RT [min]	# Missed Cleavages
	Medium	ISAVSVAER	1	1	1	Q08211		0	0				0.033	0.22	20.71	0.166439	2	931.523	2.25807	42.0558	0
	Medium	LPIEPR	1	1	1	Q08211		0	466901				0.035	0.2425	30.91	0.00389261	2	724.435	0.0662557	42.5885	0
Q08AD1	Calmodulin-regulated spectrin-associated protein 2 OS=Homo sapiens GN=CAMSAP2 PE=1 SV=3 - [CAMP2_HUMAN]	30.85	0.4	1	1	1	1					1489	167.984	6.80029
	A2	Sequence	# PSMs	# Proteins	# Protein Groups	Protein Group Accessions	Modifications	ΔCn	Area	(Medium+Heavy)/Light	(Medium+Heavy)/Light Count	(Medium+Heavy)/Light Variability [%]	q-Value	PEP	IonScore	Exp Value	Charge	MH+ [Da]	ΔM [ppm]	RT [min]	# Missed Cleavages
	High	GTLEQR	1	1	1	Q08AD1		0	0				0.004	0.01676	30.85	0.0157871	2	703.374	0.835496	23.1716	0
P23368	NAD-dependent malic enzyme, mitochondrial OS=Homo sapiens GN=ME2 PE=1 SV=1 - [MAOM_HUMAN]	30.17	1.54	2	1	1	1	2.31261e+06	0.747855	1		584	65.4018	7.60596
	A2	Sequence	# PSMs	# Proteins	# Protein Groups	Protein Group Accessions	Modifications	ΔCn	Area	(Medium+Heavy)/Light	(Medium+Heavy)/Light Count	(Medium+Heavy)/Light Variability [%]	q-Value	PEP	IonScore	Exp Value	Charge	MH+ [Da]	ΔM [ppm]	RT [min]	# Missed Cleavages
	High	AVVVTDGER	1	2	1	P23368		0	2.31261e+06	0.747855	1		0.002	0.006022	30.17	0.0130779	2	945.501	0.845854	34.3171	0
O14531	Dihydropyrimidinase-related protein 4 OS=Homo sapiens GN=DPYSL4 PE=1 SV=2 - [DPYL4_HUMAN]	29.48	1.92	1	1	1	1	4.42234e+06				572	61.8384	7.09326
	A2	Sequence	# PSMs	# Proteins	# Protein Groups	Protein Group Accessions	Modifications	ΔCn	Area	(Medium+Heavy)/Light	(Medium+Heavy)/Light Count	(Medium+Heavy)/Light Variability [%]	q-Value	PEP	IonScore	Exp Value	Charge	MH+ [Da]	ΔM [ppm]	RT [min]	# Missed Cleavages
	High	GAPAVVISQGR	1	1	1	O14531		0	4.42234e+06				0	0.001806	29.48	0.00986298	2	1054.6	1.23352	43.6769	0
P02686	Myelin basic protein OS=Homo sapiens GN=MBP PE=1 SV=3 - [MBP_HUMAN]	29.06	6.58	1	2	2	2	6.13179e+06	2.20341	1		304	33.0973	9.78857
	A2	Sequence	# PSMs	# Proteins	# Protein Groups	Protein Group Accessions	Modifications	ΔCn	Area	(Medium+Heavy)/Light	(Medium+Heavy)/Light Count	(Medium+Heavy)/Light Variability [%]	q-Value	PEP	IonScore	Exp Value	Charge	MH+ [Da]	ΔM [ppm]	RT [min]	# Missed Cleavages
	High	GVDAQGTLSk	1	1	1	P02686	C-Term(Label:18O(1))	0	0				0	0.0002403	29.06	0.0177556	2	977.515	0.594526	32.9224	0
	High	DTGILDSIGr	1	1	1	P02686	C-Term(Label:18O(1))	0	6.13179e+06	2.20341	1		0.005	0.05259	14.93	0.636305	2	1048.55	-1.31857	60.5494	0
P26641	Elongation factor 1-gamma OS=Homo sapiens GN=EEF1G PE=1 SV=3 - [EF1G_HUMAN]	28.43	1.6	1	1	1	1	2.29807e+06	0.044207	1		437	50.0871	6.66846
	A2	Sequence	# PSMs	# Proteins	# Protein Groups	Protein Group Accessions	Modifications	ΔCn	Area	(Medium+Heavy)/Light	(Medium+Heavy)/Light Count	(Medium+Heavy)/Light Variability [%]	q-Value	PEP	IonScore	Exp Value	Charge	MH+ [Da]	ΔM [ppm]	RT [min]	# Missed Cleavages
	High	FAETQPK	1	1	1	P26641		0	2.29807e+06	0.044207	1		0.004	0.01375	28.43	0.0203122	2	820.421	1.54788	29.9091	0
Q8N111	Cell cycle exit and neuronal differentiation protein 1 OS=Homo sapiens GN=CEND1 PE=2 SV=1 - [CEND_HUMAN]	28.2	14.77	1	2	2	3	1.26438e+07				149	14.9448	9.20264
	A2	Sequence	# PSMs	# Proteins	# Protein Groups	Protein Group Accessions	Modifications	ΔCn	Area	(Medium+Heavy)/Light	(Medium+Heavy)/Light Count	(Medium+Heavy)/Light Variability [%]	q-Value	PEP	IonScore	Exp Value	Charge	MH+ [Da]	ΔM [ppm]	RT [min]	# Missed Cleavages
	High	VPQVTTEAK	1	1	1	Q8N111		0	1.77544e+07				0	7.161e-06	29.54	0.0140078	2	972.536	-0.0236074	34.2142	0
	High	QQPPAAPTTAPAK	2	1	1	Q8N111		0	7.53314e+06				0.002	0.007225	13.16	0.618315	2	1277.69	0.263729	33.6964	0
P84098	60S ribosomal protein L19 OS=Homo sapiens GN=RPL19 PE=1 SV=1 - [RL19_HUMAN]	28.15	4.59	1	1	1	2	4.11694e+06	0.422169	1		196	23.4512	11.4731
	A2	Sequence	# PSMs	# Proteins	# Protein Groups	Protein Group Accessions	Modifications	ΔCn	Area	(Medium+Heavy)/Light	(Medium+Heavy)/Light Count	(Medium+Heavy)/Light Variability [%]	q-Value	PEP	IonScore	Exp Value	Charge	MH+ [Da]	ΔM [ppm]	RT [min]	# Missed Cleavages
	High	LLADQAEAR	2	1	1	P84098		0	4.11694e+06	0.422169	1		0.002	0.006022	28.15	0.0198276	2	986.526	-0.797612	36.9875	0
Q8NF86	Serine protease 33 OS=Homo sapiens GN=PRSS33 PE=1 SV=3 - [PRS33_HUMAN]	28.1	2.5	1	1	1	1					280	29.7675	9.93506
	A2	Sequence	# PSMs	# Proteins	# Protein Groups	Protein Group Accessions	Modifications	ΔCn	Area	(Medium+Heavy)/Light	(Medium+Heavy)/Light Count	(Medium+Heavy)/Light Variability [%]	q-Value	PEP	IonScore	Exp Value	Charge	MH+ [Da]	ΔM [ppm]	RT [min]	# Missed Cleavages
	High	LGSTSPR	1	1	1	Q8NF86		0	0				0.004	0.01454	28.1	0.0303568	2	717.389	0.0186085	27.9133	0
P78352	Disks large homolog 4 OS=Homo sapiens GN=DLG4 PE=1 SV=3 - [DLG4_HUMAN]	27.81	1.66	1	1	1	1	1.62323e+06	1.57661	1		724	80.4458	5.88428
	A2	Sequence	# PSMs	# Proteins	# Protein Groups	Protein Group Accessions	Modifications	ΔCn	Area	(Medium+Heavy)/Light	(Medium+Heavy)/Light Count	(Medium+Heavy)/Light Variability [%]	q-Value	PEP	IonScore	Exp Value	Charge	MH+ [Da]	ΔM [ppm]	RT [min]	# Missed Cleavages
	High	IIPGGAAAQDGR	1	1	1	P78352		0	1.62323e+06	1.57661	1		0.002	0.00798	27.81	0.0205315	2	1125.6	3.10105	37.4536	0
Q9H115	Beta-soluble NSF attachment protein OS=Homo sapiens GN=NAPB PE=1 SV=2 - [SNAB_HUMAN]	27.34	4.36	1	1	1	1	2.90113e+06				298	33.5355	5.46533
	A2	Sequence	# PSMs	# Proteins	# Protein Groups	Protein Group Accessions	Modifications	ΔCn	Area	(Medium+Heavy)/Light	(Medium+Heavy)/Light Count	(Medium+Heavy)/Light Variability [%]	q-Value	PEP	IonScore	Exp Value	Charge	MH+ [Da]	ΔM [ppm]	RT [min]	# Missed Cleavages
	High	SIQGDGEGDGDLK	1	1	1	Q9H115		0	2.90113e+06				0.004	0.01154	27.34	0.00922508	2	1290.58	-0.120275	36.2207	0
O60814	Histone H2B type 1-K OS=Homo sapiens GN=HIST1H2BK PE=1 SV=3 - [H2B1K_HUMAN]	27.14	5.56	14	1	1	1					126	13.8816	10.3159
	A2	Sequence	# PSMs	# Proteins	# Protein Groups	Protein Group Accessions	Modifications	ΔCn	Area	(Medium+Heavy)/Light	(Medium+Heavy)/Light Count	(Medium+Heavy)/Light Variability [%]	q-Value	PEP	IonScore	Exp Value	Charge	MH+ [Da]	ΔM [ppm]	RT [min]	# Missed Cleavages
	High	EIQTAVR	1	14	1	O60814		0	0				0	0.006022	27.14	0.0258884	2	816.456	-1.7773	32.2174	0
O94925	Glutaminase kidney isoform, mitochondrial OS=Homo sapiens GN=GLS PE=1 SV=1 - [GLSK_HUMAN]	26.89	1.2	1	1	1	1	785826				669	73.4139	7.76709
	A2	Sequence	# PSMs	# Proteins	# Protein Groups	Protein Group Accessions	Modifications	ΔCn	Area	(Medium+Heavy)/Light	(Medium+Heavy)/Light Count	(Medium+Heavy)/Light Variability [%]	q-Value	PEP	IonScore	Exp Value	Charge	MH+ [Da]	ΔM [ppm]	RT [min]	# Missed Cleavages
	High	VLSPEAVR	1	1	1	O94925		0	785826				0.004	0.02756	26.89	0.0179064	2	870.505	0.479079	43.0697	0
Q6ZN28	Metastasis-associated in colon cancer protein 1 OS=Homo sapiens GN=MACC1 PE=1 SV=2 - [MACC1_HUMAN]	25.97	0.82	1	1	1	1	990532	0.558427	1		852	96.5778	6.90283
	A2	Sequence	# PSMs	# Proteins	# Protein Groups	Protein Group Accessions	Modifications	ΔCn	Area	(Medium+Heavy)/Light	(Medium+Heavy)/Light Count	(Medium+Heavy)/Light Variability [%]	q-Value	PEP	IonScore	Exp Value	Charge	MH+ [Da]	ΔM [ppm]	RT [min]	# Missed Cleavages
	Medium	SAPLSPk	1	1	1	Q6ZN28	C-Term(Label:18O(1))	0	990532	0.558427	1		0.039	0.2604	25.97	0.0547593	2	701.409	2.2285	36.5215	0
O95716	Ras-related protein Rab-3D OS=Homo sapiens GN=RAB3D PE=1 SV=1 - [RAB3D_HUMAN]	25.91	5.02	4	1	1	1					219	24.2518	4.93213
	A2	Sequence	# PSMs	# Proteins	# Protein Groups	Protein Group Accessions	Modifications	ΔCn	Area	(Medium+Heavy)/Light	(Medium+Heavy)/Light Count	(Medium+Heavy)/Light Variability [%]	q-Value	PEP	IonScore	Exp Value	Charge	MH+ [Da]	ΔM [ppm]	RT [min]	# Missed Cleavages
	Medium	LLLIGNSSVGK	1	4	1	O95716		0	0				0.028	0.1844	25.91	0.0138482	2	1100.67	1.63151	58.1248	0
O60641	Clathrin coat assembly protein AP180 OS=Homo sapiens GN=SNAP91 PE=1 SV=2 - [AP180_HUMAN]	25.58	1.65	1	1	1	2	1.0688e+06	3.3763	1		907	92.444	4.85596
	A2	Sequence	# PSMs	# Proteins	# Protein Groups	Protein Group Accessions	Modifications	ΔCn	Area	(Medium+Heavy)/Light	(Medium+Heavy)/Light Count	(Medium+Heavy)/Light Variability [%]	q-Value	PEP	IonScore	Exp Value	Charge	MH+ [Da]	ΔM [ppm]	RT [min]	# Missed Cleavages
	High	IAAAQYSVTGSAVAR	2	1	1	O60641		0	1.0688e+06	3.3763	1		0.002	0.008398	25.06	0.0407015	2	1464.78	0.32234	49.7184	0
O94772	Lymphocyte antigen 6H OS=Homo sapiens GN=LY6H PE=2 SV=1 - [LY6H_HUMAN]	25.39	5.71	1	1	1	1					140	14.6591	7.25439
	A2	Sequence	# PSMs	# Proteins	# Protein Groups	Protein Group Accessions	Modifications	ΔCn	Area	(Medium+Heavy)/Light	(Medium+Heavy)/Light Count	(Medium+Heavy)/Light Variability [%]	q-Value	PEP	IonScore	Exp Value	Charge	MH+ [Da]	ΔM [ppm]	RT [min]	# Missed Cleavages
	High	ITDPSSSR	1	1	1	O94772		0	0				0.002	0.006394	25.39	0.038157	2	862.425	-1.72294	24.9937	0
P06748	Nucleophosmin OS=Homo sapiens GN=NPM1 PE=1 SV=2 - [NPM_HUMAN]	24.79	5.44	1	2	2	2	8.61191e+06				294	32.5548	4.77979
	A2	Sequence	# PSMs	# Proteins	# Protein Groups	Protein Group Accessions	Modifications	ΔCn	Area	(Medium+Heavy)/Light	(Medium+Heavy)/Light Count	(Medium+Heavy)/Light Variability [%]	q-Value	PEP	IonScore	Exp Value	Charge	MH+ [Da]	ΔM [ppm]	RT [min]	# Missed Cleavages
	High	GPSSVEDIK	1	1	1	P06748		0	8.61191e+06				0	0.004795	24.79	0.0426484	2	931.473	-0.152742	37.0553	0
	Medium	LLSISGK	1	1	1	P06748		0	0				0.013	0.07941	10.85	1.6116	2	717.45	-0.770129	45.7652	0
P62158	Calmodulin OS=Homo sapiens GN=CALM1 PE=1 SV=2 - [CALM_HUMAN]	24.77	6.04	1	1	1	1	2.11479e+06	5.28471	1		149	16.8268	4.22119
	A2	Sequence	# PSMs	# Proteins	# Protein Groups	Protein Group Accessions	Modifications	ΔCn	Area	(Medium+Heavy)/Light	(Medium+Heavy)/Light Count	(Medium+Heavy)/Light Variability [%]	q-Value	PEP	IonScore	Exp Value	Charge	MH+ [Da]	ΔM [ppm]	RT [min]	# Missed Cleavages
	High	DTDSEEEIr	1	1	1	P62158	C-Term(Label:18O(1))	0	2.11479e+06	5.28471	1		0	0.006022	24.77	0.0105029	2	1095.47	-0.0107457	31.0319	0
Q92752	Tenascin-R OS=Homo sapiens GN=TNR PE=1 SV=3 - [TENR_HUMAN]	24.35	0.52	1	1	1	2					1358	149.467	4.81787
	A2	Sequence	# PSMs	# Proteins	# Protein Groups	Protein Group Accessions	Modifications	ΔCn	Area	(Medium+Heavy)/Light	(Medium+Heavy)/Light Count	(Medium+Heavy)/Light Variability [%]	q-Value	PEP	IonScore	Exp Value	Charge	MH+ [Da]	ΔM [ppm]	RT [min]	# Missed Cleavages
	High	TELDSPR	2	1	1	Q92752		0	0				0.002	0.006022	24.35	0.0446248	2	817.405	-0.428937	31.2174	0
Q96GD0	Pyridoxal phosphate phosphatase OS=Homo sapiens GN=PDXP PE=1 SV=2 - [PLPP_HUMAN]	23.24	4.73	1	1	1	1	2.15533e+06	1.00164	1		296	31.6783	6.55127
	A2	Sequence	# PSMs	# Proteins	# Protein Groups	Protein Group Accessions	Modifications	ΔCn	Area	(Medium+Heavy)/Light	(Medium+Heavy)/Light Count	(Medium+Heavy)/Light Variability [%]	q-Value	PEP	IonScore	Exp Value	Charge	MH+ [Da]	ΔM [ppm]	RT [min]	# Missed Cleavages
	High	LAGDPSAGDGAAPR	1	1	1	Q96GD0		0	2.15533e+06	1.00164	1		0.002	0.006022	23.24	0.052878	2	1254.61	-0.521477	34.498	0
P40925	Malate dehydrogenase, cytoplasmic OS=Homo sapiens GN=MDH1 PE=1 SV=4 - [MDHC_HUMAN]	23.09	5.09	1	2	2	3	8.57352e+06	0.122892	1		334	36.403	7.35693
	A2	Sequence	# PSMs	# Proteins	# Protein Groups	Protein Group Accessions	Modifications	ΔCn	Area	(Medium+Heavy)/Light	(Medium+Heavy)/Light Count	(Medium+Heavy)/Light Variability [%]	q-Value	PEP	IonScore	Exp Value	Charge	MH+ [Da]	ΔM [ppm]	RT [min]	# Missed Cleavages
	High	SAPSIPK	2	1	1	P40925		0	1.50879e+06	0.122892	1		0.004	0.01409	19.72	0.0757283	2	699.402	-2.07905	35.9865	0
	High	GEFVTTVQQr	1	1	1	P40925	C-Term(Label:18O(1))	0	1.56382e+07				0.005	0.05267	11.89	1.08073	2	1166.61	2.06768	44.6188	0
Q8WXF1	Paraspeckle component 1 OS=Homo sapiens GN=PSPC1 PE=1 SV=1 - [PSPC1_HUMAN]	22.98	1.53	1	1	1	1	1.8203e+06				523	58.7062	6.66846
	A2	Sequence	# PSMs	# Proteins	# Protein Groups	Protein Group Accessions	Modifications	ΔCn	Area	(Medium+Heavy)/Light	(Medium+Heavy)/Light Count	(Medium+Heavy)/Light Variability [%]	q-Value	PEP	IonScore	Exp Value	Charge	MH+ [Da]	ΔM [ppm]	RT [min]	# Missed Cleavages
	High	AVVVVDDR	1	1	1	Q8WXF1		0	1.8203e+06				0.004	0.02339	22.98	0.0770356	2	872.484	0.452831	38.9203	0
P11142	Heat shock cognate 71 kDa protein OS=Homo sapiens GN=HSPA8 PE=1 SV=1 - [HSP7C_HUMAN]	22.8	4.02	2	2	3	3	1.32529e+07	0.773914	1		646	70.8542	5.51611
	A2	Sequence	# PSMs	# Proteins	# Protein Groups	Protein Group Accessions	Modifications	ΔCn	Area	(Medium+Heavy)/Light	(Medium+Heavy)/Light Count	(Medium+Heavy)/Light Variability [%]	q-Value	PEP	IonScore	Exp Value	Charge	MH+ [Da]	ΔM [ppm]	RT [min]	# Missed Cleavages
	High	DAGTIAGLNVLR	1	1	1	P11142		0	23160572	0.773914	1		0.005	0.0542	22.8	0.0461831	2	1199.67	0.129014	66.6847	0
	High	ITITNDk	1	2	1	P11142	C-Term(Label:18O(1))	0	3.34528e+06				0.005	0.02992	19.38	0.349496	2	806.451	0.137376	33.662	0
	Medium	NTTIPTK	1	3	2	P11142;P38646		0	0				0.024	0.1326	19.81	0.243942	2	774.436	0.122985	29.2804	0
Q9UN36	Protein NDRG2 OS=Homo sapiens GN=NDRG2 PE=1 SV=2 - [NDRG2_HUMAN]	22.56	3.77	1	1	1	1	2.32712e+06				371	40.7722	5.21143
	A2	Sequence	# PSMs	# Proteins	# Protein Groups	Protein Group Accessions	Modifications	ΔCn	Area	(Medium+Heavy)/Light	(Medium+Heavy)/Light Count	(Medium+Heavy)/Light Variability [%]	q-Value	PEP	IonScore	Exp Value	Charge	MH+ [Da]	ΔM [ppm]	RT [min]	# Missed Cleavages
	High	TASLTSAASVDGNR	1	1	1	Q9UN36		0	2.32712e+06				0.004	0.01385	22.56	0.0898494	2	1349.66	-2.92118	42.4593	0
P23528	Cofilin-1 OS=Homo sapiens GN=CFL1 PE=1 SV=3 - [COF1_HUMAN]	22.3	8.43	1	1	1	1	28456542				166	18.4907	8.08936
	A2	Sequence	# PSMs	# Proteins	# Protein Groups	Protein Group Accessions	Modifications	ΔCn	Area	(Medium+Heavy)/Light	(Medium+Heavy)/Light Count	(Medium+Heavy)/Light Variability [%]	q-Value	PEP	IonScore	Exp Value	Charge	MH+ [Da]	ΔM [ppm]	RT [min]	# Missed Cleavages
	High	LGGSAVISLEGKPL	1	1	1	P23528		0	28456542				0	0.006022	22.3	0.0323864	2	1340.78	0.287066	68.4258	0
O15145	Actin-related protein 2/3 complex subunit 3 OS=Homo sapiens GN=ARPC3 PE=1 SV=3 - [ARPC3_HUMAN]	22.19	6.18	1	1	1	1	4136212	0.728015	1		178	20.5334	8.5874
	A2	Sequence	# PSMs	# Proteins	# Protein Groups	Protein Group Accessions	Modifications	ΔCn	Area	(Medium+Heavy)/Light	(Medium+Heavy)/Light Count	(Medium+Heavy)/Light Variability [%]	q-Value	PEP	IonScore	Exp Value	Charge	MH+ [Da]	ΔM [ppm]	RT [min]	# Missed Cleavages
	Medium	LIGNmALLPIR	1	1	1	O15145	M5(Oxidation)	0	4136212	0.728015	1		0.024	0.1401	22.19	0.0286876	2	1226.73	1.52133	68.7734	0
P36542	ATP synthase subunit gamma, mitochondrial OS=Homo sapiens GN=ATP5C1 PE=1 SV=1 - [ATPG_HUMAN]	22.06	3.69	1	1	1	1	5.86703e+06				298	32.9753	9.21729
	A2	Sequence	# PSMs	# Proteins	# Protein Groups	Protein Group Accessions	Modifications	ΔCn	Area	(Medium+Heavy)/Light	(Medium+Heavy)/Light Count	(Medium+Heavy)/Light Variability [%]	q-Value	PEP	IonScore	Exp Value	Charge	MH+ [Da]	ΔM [ppm]	RT [min]	# Missed Cleavages
	High	SEVATLTAAGK	1	1	1	P36542		0	5.86703e+06				0	2.492e-06	22.06	0.123527	2	1047.57	-0.54299	43.0299	0
Q14103	Heterogeneous nuclear ribonucleoprotein D0 OS=Homo sapiens GN=HNRNPD PE=1 SV=1 - [HNRPD_HUMAN]	21.87	3.94	1	1	1	1	2.49494e+06	0.401098	1		355	38.4103	7.81104
	A2	Sequence	# PSMs	# Proteins	# Protein Groups	Protein Group Accessions	Modifications	ΔCn	Area	(Medium+Heavy)/Light	(Medium+Heavy)/Light Count	(Medium+Heavy)/Light Variability [%]	q-Value	PEP	IonScore	Exp Value	Charge	MH+ [Da]	ΔM [ppm]	RT [min]	# Missed Cleavages
	High	IFVGGLSPDTPEEK	1	1	1	Q14103		0	2.49494e+06	0.401098	1		0.009	0.0607	21.87	0.0884176	2	1488.76	-0.100171	59.7095	0
Q9NSD9	Phenylalanine--tRNA ligase beta subunit OS=Homo sapiens GN=FARSB PE=1 SV=3 - [SYFB_HUMAN]	20.89	1.36	1	1	1	1	4.02753e+06				589	66.0735	6.84424
	A2	Sequence	# PSMs	# Proteins	# Protein Groups	Protein Group Accessions	Modifications	ΔCn	Area	(Medium+Heavy)/Light	(Medium+Heavy)/Light Count	(Medium+Heavy)/Light Variability [%]	q-Value	PEP	IonScore	Exp Value	Charge	MH+ [Da]	ΔM [ppm]	RT [min]	# Missed Cleavages
	High	TAEFQVAR	1	1	1	Q9NSD9		0	4.02753e+06				0	0.002567	20.89	0.162126	2	921.48	0.8916	43.3164	0
O60234	Glia maturation factor gamma OS=Homo sapiens GN=GMFG PE=1 SV=1 - [GMFG_HUMAN]	20.19	6.34	2	1	1	1	858429	0.782827	1		142	16.7904	5.26221
	A2	Sequence	# PSMs	# Proteins	# Protein Groups	Protein Group Accessions	Modifications	ΔCn	Area	(Medium+Heavy)/Light	(Medium+Heavy)/Light Count	(Medium+Heavy)/Light Variability [%]	q-Value	PEP	IonScore	Exp Value	Charge	MH+ [Da]	ΔM [ppm]	RT [min]	# Missed Cleavages
	High	LVQTAELTK	1	2	1	O60234		0	858429	0.782827	1		0.004	0.0205	20.19	0.103377	2	1002.58	0.084927	42.1958	0
Q12860	Contactin-1 OS=Homo sapiens GN=CNTN1 PE=1 SV=1 - [CNTN1_HUMAN]	20.09	1.87	1	2	2	2	4.98099e+06	1.36157	1		1018	113.249	5.89697
	A2	Sequence	# PSMs	# Proteins	# Protein Groups	Protein Group Accessions	Modifications	ΔCn	Area	(Medium+Heavy)/Light	(Medium+Heavy)/Light Count	(Medium+Heavy)/Light Variability [%]	q-Value	PEP	IonScore	Exp Value	Charge	MH+ [Da]	ΔM [ppm]	RT [min]	# Missed Cleavages
	High	VTVTNPDTGr	1	1	1	Q12860	C-Term(Label:18O(1))	0	8.93348e+06	1.36157	1		0.004	0.009996	15.46	0.445158	2	1061.55	2.60662	33.5284	0
	High	GEPSIPSNR	1	1	1	Q12860		0	1.0285e+06				0.005	0.04973	21.63	0.0917236	2	956.479	-0.669989	35.895	0
O43426	Synaptojanin-1 OS=Homo sapiens GN=SYNJ1 PE=1 SV=2 - [SYNJ1_HUMAN]	19.17	0.76	1	1	1	1	3.71463e+06	0.272322	1		1573	172.995	7.41553
	A2	Sequence	# PSMs	# Proteins	# Protein Groups	Protein Group Accessions	Modifications	ΔCn	Area	(Medium+Heavy)/Light	(Medium+Heavy)/Light Count	(Medium+Heavy)/Light Variability [%]	q-Value	PEP	IonScore	Exp Value	Charge	MH+ [Da]	ΔM [ppm]	RT [min]	# Missed Cleavages
	High	VSEQTLQSASSK	1	1	1	O43426		0	3.71463e+06	0.272322	1		0.002	0.007829	19.17	0.200354	2	1264.64	2.41769	36.164	0
Q96CW1	AP-2 complex subunit mu OS=Homo sapiens GN=AP2M1 PE=1 SV=2 - [AP2M1_HUMAN]	19.1	1.61	1	1	1	2	3.68116e+06	0.37619	1		435	49.623	9.53955
	A2	Sequence	# PSMs	# Proteins	# Protein Groups	Protein Group Accessions	Modifications	ΔCn	Area	(Medium+Heavy)/Light	(Medium+Heavy)/Light Count	(Medium+Heavy)/Light Variability [%]	q-Value	PEP	IonScore	Exp Value	Charge	MH+ [Da]	ΔM [ppm]	RT [min]	# Missed Cleavages
	High	NAVDAFR	2	1	1	Q96CW1		0	3.68116e+06	0.37619	1		0.004	0.01157	19.1	0.249745	2	792.4	0.652352	43.63	0
P09936	Ubiquitin carboxyl-terminal hydrolase isozyme L1 OS=Homo sapiens GN=UCHL1 PE=1 SV=2 - [UCHL1_HUMAN]	18.9	4.48	1	1	1	1	6166396	1.98368	1		223	24.8085	5.47803
	A2	Sequence	# PSMs	# Proteins	# Protein Groups	Protein Group Accessions	Modifications	ΔCn	Area	(Medium+Heavy)/Light	(Medium+Heavy)/Light Count	(Medium+Heavy)/Light Variability [%]	q-Value	PEP	IonScore	Exp Value	Charge	MH+ [Da]	ΔM [ppm]	RT [min]	# Missed Cleavages
	High	LGFEDGSVLk	1	1	1	P09936	C-Term(Label:18O(1))	0	6166396	1.98368	1		0.005	0.04466	18.9	0.2248	2	1066.57	0.360812	61.2259	0
P05026	Sodium/potassium-transporting ATPase subunit beta-1 OS=Homo sapiens GN=ATP1B1 PE=1 SV=1 - [AT1B1_HUMAN]	18.57	4.62	1	1	1	1	1.98481e+07				303	35.0389	8.52881
	A2	Sequence	# PSMs	# Proteins	# Protein Groups	Protein Group Accessions	Modifications	ΔCn	Area	(Medium+Heavy)/Light	(Medium+Heavy)/Light Count	(Medium+Heavy)/Light Variability [%]	q-Value	PEP	IonScore	Exp Value	Charge	MH+ [Da]	ΔM [ppm]	RT [min]	# Missed Cleavages
	High	VAPPGLTQIPQIQK	1	1	1	P05026		0	1.98481e+07				0	0.0003936	18.57	0.0382237	2	1489.87	-0.0379057	63.1118	0
Q16143	Beta-synuclein OS=Homo sapiens GN=SNCB PE=1 SV=1 - [SYUB_HUMAN]	18.1	6.72	2	1	1	1	3.53144e+06				134	14.279	4.41162
	A2	Sequence	# PSMs	# Proteins	# Protein Groups	Protein Group Accessions	Modifications	ΔCn	Area	(Medium+Heavy)/Light	(Medium+Heavy)/Light Count	(Medium+Heavy)/Light Variability [%]	q-Value	PEP	IonScore	Exp Value	Charge	MH+ [Da]	ΔM [ppm]	RT [min]	# Missed Cleavages
	High	EGVVAAAEK	1	2	1	Q16143		0	3.53144e+06				0.002	0.006022	18.1	0.199023	2	873.468	0.229856	33.2365	0
O00241	Signal-regulatory protein beta-1 OS=Homo sapiens GN=SIRPB1 PE=1 SV=5 - [SIRB1_HUMAN]	18.01	2.51	3	1	1	2	1.51165e+06	0.414967	1		398	43.184	6.52197
	A2	Sequence	# PSMs	# Proteins	# Protein Groups	Protein Group Accessions	Modifications	ΔCn	Area	(Medium+Heavy)/Light	(Medium+Heavy)/Light Count	(Medium+Heavy)/Light Variability [%]	q-Value	PEP	IonScore	Exp Value	Charge	MH+ [Da]	ΔM [ppm]	RT [min]	# Missed Cleavages
	High	SGAGTELSVR	2	3	1	O00241		0	1.51165e+06	0.414967	1		0.002	0.006022	24.31	0.0678346	2	976.504	-1.8181	39.2193	0
P19367	Hexokinase-1 OS=Homo sapiens GN=HK1 PE=1 SV=3 - [HXK1_HUMAN]	17.82	1.74	1	2	2	2	1.44718e+06				917	102.42	6.80029
	A2	Sequence	# PSMs	# Proteins	# Protein Groups	Protein Group Accessions	Modifications	ΔCn	Area	(Medium+Heavy)/Light	(Medium+Heavy)/Light Count	(Medium+Heavy)/Light Variability [%]	q-Value	PEP	IonScore	Exp Value	Charge	MH+ [Da]	ΔM [ppm]	RT [min]	# Missed Cleavages
	High	LVPDSDVR	1	1	1	P19367		0	1.29166e+06				0.005	0.03213	17.82	0.221363	2	900.479	-0.00896884	37.3128	0
	Medium	ITPELLTR	1	1	1	P19367		0	1.6027e+06				0.023	0.1229	14.35	0.288317	2	942.56	-1.96926	55.0662	0
O00154	Cytosolic acyl coenzyme A thioester hydrolase OS=Homo sapiens GN=ACOT7 PE=1 SV=3 - [BACH_HUMAN]	17.63	3.16	1	1	1	1	393820	2.94648	1		380	41.7693	8.54346
	A2	Sequence	# PSMs	# Proteins	# Protein Groups	Protein Group Accessions	Modifications	ΔCn	Area	(Medium+Heavy)/Light	(Medium+Heavy)/Light Count	(Medium+Heavy)/Light Variability [%]	q-Value	PEP	IonScore	Exp Value	Charge	MH+ [Da]	ΔM [ppm]	RT [min]	# Missed Cleavages
	High	mIEEAGAIISTR	1	1	1	O00154	M1(Oxidation)	0	393820	2.94648	1		0.002	0.006022	17.63	0.307199	2	1306.67	3.1423	52.8406	0
P17252	Protein kinase C alpha type OS=Homo sapiens GN=PRKCA PE=1 SV=4 - [KPCA_HUMAN]	17.27	1.19	1	1	1	1	1.96549e+06				672	76.7001	7.04932
	A2	Sequence	# PSMs	# Proteins	# Protein Groups	Protein Group Accessions	Modifications	ΔCn	Area	(Medium+Heavy)/Light	(Medium+Heavy)/Light Count	(Medium+Heavy)/Light Variability [%]	q-Value	PEP	IonScore	Exp Value	Charge	MH+ [Da]	ΔM [ppm]	RT [min]	# Missed Cleavages
	Medium	VISPSEDR	1	1	1	P17252		0	1.96549e+06				0.024	0.1536	17.27	0.235312	2	902.458	0.11307	30.8292	0
P31146	Coronin-1A OS=Homo sapiens GN=CORO1A PE=1 SV=4 - [COR1A_HUMAN]	17.13	1.74	1	1	1	1	944400	0.614582	1		461	50.9938	6.68311
	A2	Sequence	# PSMs	# Proteins	# Protein Groups	Protein Group Accessions	Modifications	ΔCn	Area	(Medium+Heavy)/Light	(Medium+Heavy)/Light Count	(Medium+Heavy)/Light Variability [%]	q-Value	PEP	IonScore	Exp Value	Charge	MH+ [Da]	ΔM [ppm]	RT [min]	# Missed Cleavages
	Medium	AVFVSEGK	1	1	1	P31146		0	944400	0.614582	1		0.012	0.07171	17.13	0.447313	2	836.454	2.97883	39.3708	0
P15880	40S ribosomal protein S2 OS=Homo sapiens GN=RPS2 PE=1 SV=2 - [RS2_HUMAN]	17.07	3.75	1	1	1	1	4.25509e+06				293	31.3046	10.2427
	A2	Sequence	# PSMs	# Proteins	# Protein Groups	Protein Group Accessions	Modifications	ΔCn	Area	(Medium+Heavy)/Light	(Medium+Heavy)/Light Count	(Medium+Heavy)/Light Variability [%]	q-Value	PEP	IonScore	Exp Value	Charge	MH+ [Da]	ΔM [ppm]	RT [min]	# Missed Cleavages
	High	GTGIVSAPVPK	1	1	1	P15880		0	4.25509e+06				0.004	0.02321	17.07	0.12271	2	1025.6	-0.699201	46.9015	0
O94973	AP-2 complex subunit alpha-2 OS=Homo sapiens GN=AP2A2 PE=1 SV=2 - [AP2A2_HUMAN]	16.87	0.96	2	1	1	1					939	103.895	6.96143
	A2	Sequence	# PSMs	# Proteins	# Protein Groups	Protein Group Accessions	Modifications	ΔCn	Area	(Medium+Heavy)/Light	(Medium+Heavy)/Light Count	(Medium+Heavy)/Light Variability [%]	q-Value	PEP	IonScore	Exp Value	Charge	MH+ [Da]	ΔM [ppm]	RT [min]	# Missed Cleavages
	High	NADVELQQR	1	2	1	O94973		0	0				0	0.0001447	16.87	0.287825	2	1072.54	1.97615	35.9739	0
P12956	X-ray repair cross-complementing protein 6 OS=Homo sapiens GN=XRCC6 PE=1 SV=2 - [XRCC6_HUMAN]	16.84	1.64	1	1	1	1	4.06364e+06				609	69.7991	6.63916
	A2	Sequence	# PSMs	# Proteins	# Protein Groups	Protein Group Accessions	Modifications	ΔCn	Area	(Medium+Heavy)/Light	(Medium+Heavy)/Light Count	(Medium+Heavy)/Light Variability [%]	q-Value	PEP	IonScore	Exp Value	Charge	MH+ [Da]	ΔM [ppm]	RT [min]	# Missed Cleavages
	High	ImATPEQVGK	1	1	1	P12956	M2(Oxidation)	0	4.06364e+06				0.002	0.007221	16.84	0.274294	2	1089.56	0.694597	35.6956	0
P62424	60S ribosomal protein L7a OS=Homo sapiens GN=RPL7A PE=1 SV=2 - [RL7A_HUMAN]	16.78	3.38	1	1	1	1	7.91006e+06				266	29.977	10.6089
	A2	Sequence	# PSMs	# Proteins	# Protein Groups	Protein Group Accessions	Modifications	ΔCn	Area	(Medium+Heavy)/Light	(Medium+Heavy)/Light Count	(Medium+Heavy)/Light Variability [%]	q-Value	PEP	IonScore	Exp Value	Charge	MH+ [Da]	ΔM [ppm]	RT [min]	# Missed Cleavages
	High	VAPAPAVVK	1	1	1	P62424		0	7.91006e+06				0.002	0.006726	16.78	0.0398799	2	851.535	-0.30032	37.401	0
P12036	Neurofilament heavy polypeptide OS=Homo sapiens GN=NEFH PE=1 SV=4 - [NFH_HUMAN]	15.8	1.17	1	1	1	1	2.52599e+06	0.156913	1		1026	112.411	6.17627
	A2	Sequence	# PSMs	# Proteins	# Protein Groups	Protein Group Accessions	Modifications	ΔCn	Area	(Medium+Heavy)/Light	(Medium+Heavy)/Light Count	(Medium+Heavy)/Light Variability [%]	q-Value	PEP	IonScore	Exp Value	Charge	MH+ [Da]	ΔM [ppm]	RT [min]	# Missed Cleavages
	High	TSVSSVSASPSR	1	1	1	P12036		0	2.52599e+06	0.156913	1		0.002	0.006022	15.8	0.387965	2	1164.59	2.6785	32.7862	0
Q13449	Limbic system-associated membrane protein OS=Homo sapiens GN=LSAMP PE=1 SV=2 - [LSAMP_HUMAN]	15.35	5.62	1	2	2	2	6.00789e+06	0.817392	1		338	37.3702	6.97607
	A2	Sequence	# PSMs	# Proteins	# Protein Groups	Protein Group Accessions	Modifications	ΔCn	Area	(Medium+Heavy)/Light	(Medium+Heavy)/Light Count	(Medium+Heavy)/Light Variability [%]	q-Value	PEP	IonScore	Exp Value	Charge	MH+ [Da]	ΔM [ppm]	RT [min]	# Missed Cleavages
	High	AANEVSSADVK	1	1	1	Q13449		0	1.00172e+07	0.817392	1		0.004	0.02341	15.35	0.336963	2	1090.54	0.0861548	31.5272	0
	Medium	QGDTAILR	1	1	1	Q13449		0	1.99856e+06				0.017	0.1175	11.03	1.22668	2	873.476	-2.90259	40.1016	0
P62826	GTP-binding nuclear protein Ran OS=Homo sapiens GN=RAN PE=1 SV=3 - [RAN_HUMAN]	15.11	5.09	1	1	1	1	5.94804e+06				216	24.4076	7.48877
	A2	Sequence	# PSMs	# Proteins	# Protein Groups	Protein Group Accessions	Modifications	ΔCn	Area	(Medium+Heavy)/Light	(Medium+Heavy)/Light Count	(Medium+Heavy)/Light Variability [%]	q-Value	PEP	IonScore	Exp Value	Charge	MH+ [Da]	ΔM [ppm]	RT [min]	# Missed Cleavages
	High	LVLVGDGGTGK	1	1	1	P62826		0	5.94804e+06				0.004	0.01123	15.11	0.342234	2	1015.58	2.81811	47.2493	0
Q16352	Alpha-internexin OS=Homo sapiens GN=INA PE=1 SV=2 - [AINX_HUMAN]	14.71	7.21	1	3	4	4	1.27237e+06				499	55.3574	5.40186
	A2	Sequence	# PSMs	# Proteins	# Protein Groups	Protein Group Accessions	Modifications	ΔCn	Area	(Medium+Heavy)/Light	(Medium+Heavy)/Light Count	(Medium+Heavy)/Light Variability [%]	q-Value	PEP	IonScore	Exp Value	Charge	MH+ [Da]	ΔM [ppm]	RT [min]	# Missed Cleavages
	High	LLEGEETR	1	3	3	Q16352;P07196;P07197		0	0				0.004	0.01082	17.22	0.252262	2	946.485	0.650237	35.6247	0
	Medium	DVDGATLAR	1	1	1	Q16352		0	2.13383e+06				0.013	0.08578	14.71	0.505407	2	917.471	2.58933	37.217	0
	Medium	DGLAEEVQR	1	1	1	Q16352		0	1.34713e+06				0.023	0.1279	21.06	0.0771678	2	1016.5	-0.711954	40.7965	0
	Medium	AQLEEASSAR	1	1	1	Q16352		0	336151				0.035	0.2379	12.79	0.547058	2	1061.52	0.72115	30.9155	0
P00558	Phosphoglycerate kinase 1 OS=Homo sapiens GN=PGK1 PE=1 SV=3 - [PGK1_HUMAN]	14.64	1.68	1	1	1	1					417	44.5861	8.104
	A2	Sequence	# PSMs	# Proteins	# Protein Groups	Protein Group Accessions	Modifications	ΔCn	Area	(Medium+Heavy)/Light	(Medium+Heavy)/Light Count	(Medium+Heavy)/Light Variability [%]	q-Value	PEP	IonScore	Exp Value	Charge	MH+ [Da]	ΔM [ppm]	RT [min]	# Missed Cleavages
	Medium	YAEAVTR	1	1	1	P00558		0	0				0.038	0.251	14.64	0.511901	2	809.416	0.889349	30.8064	0
P39023	60S ribosomal protein L3 OS=Homo sapiens GN=RPL3 PE=1 SV=2 - [RL3_HUMAN]	14.15	1.74	2	1	1	1	2.30949e+06				403	46.0798	10.1841
	A2	Sequence	# PSMs	# Proteins	# Protein Groups	Protein Group Accessions	Modifications	ΔCn	Area	(Medium+Heavy)/Light	(Medium+Heavy)/Light Count	(Medium+Heavy)/Light Variability [%]	q-Value	PEP	IonScore	Exp Value	Charge	MH+ [Da]	ΔM [ppm]	RT [min]	# Missed Cleavages
	High	FIDTTSK	1	2	1	P39023		0	2.30949e+06				0.004	0.0286	14.15	0.534583	2	811.42	0.479664	33.413	0
P30101	Protein disulfide-isomerase A3 OS=Homo sapiens GN=PDIA3 PE=1 SV=4 - [PDIA3_HUMAN]	14.07	2.18	1	1	1	1	1.95643e+06				505	56.7468	6.354
	A2	Sequence	# PSMs	# Proteins	# Protein Groups	Protein Group Accessions	Modifications	ΔCn	Area	(Medium+Heavy)/Light	(Medium+Heavy)/Light Count	(Medium+Heavy)/Light Variability [%]	q-Value	PEP	IonScore	Exp Value	Charge	MH+ [Da]	ΔM [ppm]	RT [min]	# Missed Cleavages
	High	LAPEYEAAATR	1	1	1	P30101		0	1.95643e+06				0.004	0.01477	14.07	0.707094	2	1191.6	3.61078	42.9676	0
P04406	Glyceraldehyde-3-phosphate dehydrogenase OS=Homo sapiens GN=GAPDH PE=1 SV=3 - [G3P_HUMAN]	13.38	4.48	1	1	1	1					335	36.0304	8.45557
	A2	Sequence	# PSMs	# Proteins	# Protein Groups	Protein Group Accessions	Modifications	ΔCn	Area	(Medium+Heavy)/Light	(Medium+Heavy)/Light Count	(Medium+Heavy)/Light Variability [%]	q-Value	PEP	IonScore	Exp Value	Charge	MH+ [Da]	ΔM [ppm]	RT [min]	# Missed Cleavages
	Medium	GALQNIIPASTGAAK	1	1	1	P04406		0	0				0.024	0.1444	13.38	0.316847	2	1411.79	2.00397	60.1518	0
O43301	Heat shock 70 kDa protein 12A OS=Homo sapiens GN=HSPA12A PE=1 SV=2 - [HS12A_HUMAN]	13.13	1.48	1	1	1	1	5.65821e+06	0.432928	1		675	74.9315	6.771
	A2	Sequence	# PSMs	# Proteins	# Protein Groups	Protein Group Accessions	Modifications	ΔCn	Area	(Medium+Heavy)/Light	(Medium+Heavy)/Light Count	(Medium+Heavy)/Light Variability [%]	q-Value	PEP	IonScore	Exp Value	Charge	MH+ [Da]	ΔM [ppm]	RT [min]	# Missed Cleavages
	High	ATAIDIATSK	1	1	1	O43301		0	5.65821e+06	0.432928	1		0	4.678e-06	13.13	0.778252	2	990.547	0.705211	44.3237	0
Q06830	Peroxiredoxin-1 OS=Homo sapiens GN=PRDX1 PE=1 SV=1 - [PRDX1_HUMAN]	13.1	5.53	1	1	1	1	2.98849e+06	1.70827	1		199	22.0963	8.1333
	A2	Sequence	# PSMs	# Proteins	# Protein Groups	Protein Group Accessions	Modifications	ΔCn	Area	(Medium+Heavy)/Light	(Medium+Heavy)/Light Count	(Medium+Heavy)/Light Variability [%]	q-Value	PEP	IonScore	Exp Value	Charge	MH+ [Da]	ΔM [ppm]	RT [min]	# Missed Cleavages
	High	ATAVmPDGQFK	1	1	1	Q06830	M5(Oxidation)	0	2.98849e+06	1.70827	1		0.002	0.006022	13.1	0.573041	2	1180.57	1.605	40.521	0
P21796	Voltage-dependent anion-selective channel protein 1 OS=Homo sapiens GN=VDAC1 PE=1 SV=2 - [VDAC1_HUMAN]	0	2.83	1	1	1	2					283	30.7536	8.54346
	A2	Sequence	# PSMs	# Proteins	# Protein Groups	Protein Group Accessions	Modifications	ΔCn	Area	(Medium+Heavy)/Light	(Medium+Heavy)/Light Count	(Medium+Heavy)/Light Variability [%]	q-Value	PEP	IonScore	Exp Value	Charge	MH+ [Da]	ΔM [ppm]	RT [min]	# Missed Cleavages
	Medium	VTGSLETK	2	1	1	P21796		0	0				0.013	0.07972	27.13	0.0512184	2	834.456	-0.570321	28.5127	0
Q6NXT2	Histone H3.3C OS=Homo sapiens GN=H3F3C PE=1 SV=3 - [H3C_HUMAN]	0	5.19	5	1	1	1					135	15.2044	11.1069
	A2	Sequence	# PSMs	# Proteins	# Protein Groups	Protein Group Accessions	Modifications	ΔCn	Area	(Medium+Heavy)/Light	(Medium+Heavy)/Light Count	(Medium+Heavy)/Light Variability [%]	q-Value	PEP	IonScore	Exp Value	Charge	MH+ [Da]	ΔM [ppm]	RT [min]	# Missed Cleavages
	High	STELLIR	1	5	1	Q6NXT2		0	0				0.004	0.01079	18.09	0.242172	2	831.494	0.850185	53.2212	0
P37275	Zinc finger E-box-binding homeobox 1 OS=Homo sapiens GN=ZEB1 PE=1 SV=2 - [ZEB1_HUMAN]	0	0.8	1	1	1	1					1124	123.997	4.94482
	A2	Sequence	# PSMs	# Proteins	# Protein Groups	Protein Group Accessions	Modifications	ΔCn	Area	(Medium+Heavy)/Light	(Medium+Heavy)/Light Count	(Medium+Heavy)/Light Variability [%]	q-Value	PEP	IonScore	Exp Value	Charge	MH+ [Da]	ΔM [ppm]	RT [min]	# Missed Cleavages
	Medium	VAVDGNVIR	1	1	1	P37275		0	0				0.024	0.1386	14.37	0.286992	2	942.537	0.419796	31.219	0
P27986	Phosphatidylinositol 3-kinase regulatory subunit alpha OS=Homo sapiens GN=PIK3R1 PE=1 SV=2 - [P85A_HUMAN]	0	1.1	1	1	1	1					724	83.5465	6.16357
	A2	Sequence	# PSMs	# Proteins	# Protein Groups	Protein Group Accessions	Modifications	ΔCn	Area	(Medium+Heavy)/Light	(Medium+Heavy)/Light Count	(Medium+Heavy)/Light Variability [%]	q-Value	PEP	IonScore	Exp Value	Charge	MH+ [Da]	ΔM [ppm]	RT [min]	# Missed Cleavages
	Medium	ISEIIDSR	1	1	1	P27986		0	0				0.024	0.1614	12.99	0.871564	2	932.504	-0.690984	50.6965	0
Q9P219	Protein Daple OS=Homo sapiens GN=CCDC88C PE=1 SV=3 - [DAPLE_HUMAN]	0	0.35	1	1	1	1					2028	228.091	6.22705
	A2	Sequence	# PSMs	# Proteins	# Protein Groups	Protein Group Accessions	Modifications	ΔCn	Area	(Medium+Heavy)/Light	(Medium+Heavy)/Light Count	(Medium+Heavy)/Light Variability [%]	q-Value	PEP	IonScore	Exp Value	Charge	MH+ [Da]	ΔM [ppm]	RT [min]	# Missed Cleavages
	Medium	LQEENGR	1	1	1	Q9P219		0	0				0.024	0.1686	18.97	0.0976092	2	845.411	0.0356589	20.3098	0
Q9UI12	V-type proton ATPase subunit H OS=Homo sapiens GN=ATP6V1H PE=1 SV=1 - [VATH_HUMAN]	0	1.66	1	1	1	1	953855				483	55.8471	6.48096
	A2	Sequence	# PSMs	# Proteins	# Protein Groups	Protein Group Accessions	Modifications	ΔCn	Area	(Medium+Heavy)/Light	(Medium+Heavy)/Light Count	(Medium+Heavy)/Light Variability [%]	q-Value	PEP	IonScore	Exp Value	Charge	MH+ [Da]	ΔM [ppm]	RT [min]	# Missed Cleavages
	Medium	VIEQLGGK	1	1	1	Q9UI12		0	953855				0.017	0.1185	18.22	0.135595	2	843.494	0.536795	37.8049	0
P10114	Ras-related protein Rap-2a OS=Homo sapiens GN=RAP2A PE=1 SV=1 - [RAP2A_HUMAN]	0	6.01	3	1	1	1	2.18937e+06	0.771002	1		183	20.6023	4.81787
	A2	Sequence	# PSMs	# Proteins	# Protein Groups	Protein Group Accessions	Modifications	ΔCn	Area	(Medium+Heavy)/Light	(Medium+Heavy)/Light Count	(Medium+Heavy)/Light Variability [%]	q-Value	PEP	IonScore	Exp Value	Charge	MH+ [Da]	ΔM [ppm]	RT [min]	# Missed Cleavages
	High	VVVLGSGGVGK	1	3	1	P10114		0	2.18937e+06	0.771002	1		0.005	0.04621	19.94	0.0719877	2	971.59	1.90131	46.4715	0

## Sheet: AD2
Accession	Description	Score	Coverage	# Proteins	# Unique Peptides	# Peptides	# PSMs	Area	(Medium+Heavy)/Light	(Medium+Heavy)/Light Count	(Medium+Heavy)/Light Variability [%]	# AAs	MW [kDa]	calc. pI
P04264	Keratin, type II cytoskeletal 1 OS=Homo sapiens GN=KRT1 PE=1 SV=6 - [K2C1_HUMAN]	1894.43	18.48	1	12	12	54	2.65815e+08	0.317259	11	27.3881	644	65.999	8.11865
	A2	Sequence	# PSMs	# Proteins	# Protein Groups	Protein Group Accessions	Modifications	ΔCn	Area	(Medium+Heavy)/Light	(Medium+Heavy)/Light Count	(Medium+Heavy)/Light Variability [%]	q-Value	PEP	IonScore	Exp Value	Charge	MH+ [Da]	ΔM [ppm]	RT [min]	# Missed Cleavages
	High	GSGGGSSGGSIGGR	17	1	1	P04264		0	5.11904e+07	0.18147	1		0	3.125e-08	93.1	3.25703e-09	2	1092.5	0.507337	21.2224	0
	High	TNAENEFVTIK	4	1	1	P04264		0	2.43907e+07	0.300227	1		0	0.01075	80.68	1.42796e-07	2	1265.64	0.573428	56.6295	0
	High	SGGGFSSGSAGIINYQR	2	1	1	P04264		0	1.40509e+07	0.358987	1		0	1.517e-05	78.41	1.44212e-07	2	1657.79	-0.396535	57.8954	0
	High	TNAENEFVTIKK	7	1	1	P04264		0	1.74472e+08	0.38004	3	0.45953	0	0.0173	64.06	4.8099e-06	2	1393.73	0.6964	57.3667	1
	High	YEELQITAGR	3	2	1	P04264		0	2.88164e+07				0	0.001098	62.3	8.47935e-06	2	1179.6	0.447988	53.6398	0
	High	TLLEGEESR	5	1	1	P04264		0	391058800	0.202179	3	102.527	0	0.02302	45.51	0.000368359	2	1033.52	0.667557	44.2807	0
	High	GSGGGSSGGSIGGRGSSSGGVK	4	1	1	P04264		0	5478259	0.647055	1		0	0.002096	41.72	0.00071672	3	1751.83	0.914469	37.8576	1
	High	AQYEDIAQK	2	1	1	P04264		0	2.00875e+07				0	0.03389	37.24	0.00284143	2	1065.52	1.15921	38.9068	0
	High	DVDGAYmTK	3	1	1	P04264	M7(Oxidation)	0	1.66817e+07	0.264626	1		0	0.04684	16.93	0.0699551	2	1015.44	0.395908	31.7615	0
	High	SLVNLGGSK	5	1	1	P04264		0	2.31914e+08				0.005	0.07901	37.53	0.00349675	2	874.499	-0.751871	49.4549	0
	Medium	SISISVAR	1	1	1	P04264		0	0				0.022	0.1613	30.46	0.0129977	2	832.491	2.44922	51.0986	0
	Medium	GGSGGGGGGSSGGRGSGGGSSGGSIGGR	1	1	1	P04264		0	2.6186e+06				0.038	0.1874	15.03	0.133472	3	2079.91	-2.4906	32.9987	1
P13645	Keratin, type I cytoskeletal 10 OS=Homo sapiens GN=KRT10 PE=1 SV=6 - [K1C10_HUMAN]	636.166	17.47	12	9	10	24	2.23307e+08	0.280823	4	85.1071	584	58.7917	5.21143
	A2	Sequence	# PSMs	# Proteins	# Protein Groups	Protein Group Accessions	Modifications	ΔCn	Area	(Medium+Heavy)/Light	(Medium+Heavy)/Light Count	(Medium+Heavy)/Light Variability [%]	q-Value	PEP	IonScore	Exp Value	Charge	MH+ [Da]	ΔM [ppm]	RT [min]	# Missed Cleavages
	High	GSLGGGFSSGGFSGGSFSR	2	1	1	P13645		0	166143022	0.35649	1		0	8.97131e-09	99.75	9.69217e-10	2	1707.77	0.305296	63.6827	0
	High	SLLEGEGSSGGGGR	5	1	1	P13645		0	84302264	0.598762	1		0	3.314e-05	72.01	6.73572e-07	2	1262.6	0.390107	43.4826	0
	High	LAADDFR	5	17	3	P13645;Q04695;P08779		0	4.19474e+08				0	0.03254	55.31	5.47662e-05	2	807.399	-0.387348	45.7717	0
	High	YENEVALR	1	1	1	P13645		0	4.98671e+07				0	0.001341	46.34	0.000385574	2	993.5	-0.280702	44.5364	0
	High	SSSSGSVGESSSKGPR	3	1	1	P13645		0	317467				0	1.028e-05	44.5	0.000290947	3	1495.7	-0.491964	33.4929	1
	High	ALEESNYELEGK	1	1	1	P13645		0	3393101				0	0.01959	37.42	0.00170266	2	1381.65	0.014228	48.3349	0
	High	QSVEADINGLRR	3	2	1	P13645		0	37762826	0.11448	1		0	0.0004884	33.96	0.00600677	3	1357.72	0.340904	58.9524	1
	High	SQYEQLAEQNRK	1	1	1	P13645		0	0				0	0.02253	12.79	0.804806	3	1493.73	0.0862854	48.0343	1
	High	LKYENEVALR	2	1	1	P13645		0	1.294e+07	0.221217	1		0	0.005364	10.5	1.03831	3	1234.68	-0.23139	57.5142	1
	High	QSVEADINGLR	1	3	1	P13645		0	8.67062e+06				0.005	0.1481	30.45	0.0119909	2	1201.62	2.36465	56.9005	0
P35527	Keratin, type I cytoskeletal 9 OS=Homo sapiens GN=KRT9 PE=1 SV=3 - [K1C9_HUMAN]	570.829	11.72	1	5	5	17	3.99027e+07	0.630486	1		623	62.0268	5.23682
	A2	Sequence	# PSMs	# Proteins	# Protein Groups	Protein Group Accessions	Modifications	ΔCn	Area	(Medium+Heavy)/Light	(Medium+Heavy)/Light Count	(Medium+Heavy)/Light Variability [%]	q-Value	PEP	IonScore	Exp Value	Charge	MH+ [Da]	ΔM [ppm]	RT [min]	# Missed Cleavages
	High	SGGGGGGGLGSGGSIR	5	1	1	P35527		0	1.04646e+08				0	1.191e-05	84.7	3.16819e-08	2	1232.6	0.145027	38.8119	0
	High	FSSSGGGGGGGR	5	1	1	P35527		0	4.60494e+06				0	5.337e-05	55.32	1.8801e-05	2	982.434	0.00215695	23.7995	0
	High	STmQELNSR	3	1	1	P35527	M3(Oxidation)	0	2.03422e+06				0	0.04399	52.11	3.99865e-05	2	1081.49	-0.212804	28.1585	0
	High	FSSSSGYGGGSSR	3	1	1	P35527		0	6.44513e+06				0	0.006594	35.08	0.000807185	2	1235.52	-3.18361	34.8339	0
	High	GGSGGSYGGGGSGGGYGGGSGSR	1	1	1	P35527		0	8.61708e+06	0.630486	1		0.005	0.1088	33.13	0.000485255	2	1791.73	-1.278	32.1545	0
P35908	Keratin, type II cytoskeletal 2 epidermal OS=Homo sapiens GN=KRT2 PE=1 SV=2 - [K22E_HUMAN]	335.891	19.87	3	9	10	14	5.8711e+07	0.129745	2	104.51	639	65.3932	8.00146
	A2	Sequence	# PSMs	# Proteins	# Protein Groups	Protein Group Accessions	Modifications	ΔCn	Area	(Medium+Heavy)/Light	(Medium+Heavy)/Light Count	(Medium+Heavy)/Light Variability [%]	q-Value	PEP	IonScore	Exp Value	Charge	MH+ [Da]	ΔM [ppm]	RT [min]	# Missed Cleavages
	High	GFSSGSAVVSGGSR	3	1	1	P35908		0	1.81415e+07	0.129745	2	104.51	0	0.01589	72.76	5.77333e-07	2	1254.61	-1.08932	43.6794	0
	High	GSSSGGGYSSGSSSYGSGGR	1	1	1	P35908		0	2.76633e+06				0	0.002385	67.82	1.98235e-07	2	1740.7	-0.851459	32.292	0
	High	TAAENDFVTLK	2	1	1	P35908		0	1.85369e+07				0	0.0338	60.99	1.21812e-05	2	1208.62	1.18631	57.0567	0
	High	HGGGGGGFGGGGFGSR	2	1	1	P35908		0	0				0	0.0105	22.3	0.0250259	3	1320.58	-0.224584	55.4702	0
	High	TAAENDFVTLKK	1	1	1	P35908		0	4.26239e+07				0	0.0005715	13.91	0.499925	3	1336.71	0.172715	57.3365	1
	High	GGSGGGGSISGGGYGSGGGSGGR	1	1	1	P35908		0	1.87027e+06				0.005	0.06435	39.68	0.000274499	2	1741.75	-1.31356	33.8633	0
	High	AQYEEIAQR	1	6	2	P35908;P02538		0	8.08417e+06				0.005	0.0775	24.9	0.043038	2	1107.54	1.60177	41.3537	0
	High	SLVGLGGTK	1	1	1	P35908		0	114972056				0.005	0.1423	21.52	0.100066	2	831.492	-1.8778	48.4102	0
	High	GGSISGGGYGSGGGK	1	1	1	P35908		0	3.29073e+06				0.005	0.145	15.8	0.205161	2	1197.55	1.70345	31.9317	0
	High	DVDNAYmIK	1	1	1	P35908	M7(Oxidation)	0	9.71186e+06				0.005	0.09236	11.31	0.558402	2	1084.5	-0.0128138	44.8888	0
P14136	Glial fibrillary acidic protein OS=Homo sapiens GN=GFAP PE=1 SV=1 - [GFAP_HUMAN]	202.35	14.35	1	7	7	13	1.21805e+07	3.81524	4	32.444	432	49.8496	5.51611
	A2	Sequence	# PSMs	# Proteins	# Protein Groups	Protein Group Accessions	Modifications	ΔCn	Area	(Medium+Heavy)/Light	(Medium+Heavy)/Light Count	(Medium+Heavy)/Light Variability [%]	q-Value	PEP	IonScore	Exp Value	Charge	MH+ [Da]	ΔM [ppm]	RT [min]	# Missed Cleavages
	High	FADLTDAAAr	5	1	1	P14136	C-Term(Label:18O(1))	0	6.30349e+06	3.73454	1		0	0.0001359	64.31	5.07833e-06	2	1052.53	0.624674	50.7808	0
	High	LLEGEENr	1	1	1	P14136	C-Term(Label:18O(1))	0	3540219	6.60576	1		0	0.02541	47.33	0.00025335	2	961.484	0.402521	36.1493	0
	High	EAASYQEALAr	1	1	1	P14136	C-Term(Label:18O(1))	0	4953521	3.89769	1		0	0.007992	39.7	0.0012376	2	1210.59	-0.194292	46.6628	0
	High	LDQLTANSAr	2	1	1	P14136	C-Term(Label:18O(1))	0	4.59454e+06	2.54371	1		0	0.00647	27.09	0.0384028	2	1090.57	0.914499	39.5361	0
	High	mPPPLPTr	2	1	1	P14136	M1(Oxidation); C-Term(Label:18O(1))	0	2.52844e+07				0	0.04123	24.45	0.0441474	2	926.502	0.657806	41.9765	0
	High	NAELLr	1	1	1	P14136	C-Term(Label:18O(1))	0	1.49033e+06				0.005	0.1481	20.68	0.234288	2	717.414	-0.438307	43.9063	0
	High	AEmmELNDr	1	1	1	P14136	M3(Oxidation); M4(Oxidation); C-Term(Label:18O(1))	0	0				0.005	0.04957	14.21	0.0796561	2	1142.47	0.388127	30.6141	0
Q04695	Keratin, type I cytoskeletal 17 OS=Homo sapiens GN=KRT17 PE=1 SV=2 - [K1C17_HUMAN]	166.098	6.71	13	1	3	8	1.55457e+08				432	48.076	5.021
	A2	Sequence	# PSMs	# Proteins	# Protein Groups	Protein Group Accessions	Modifications	ΔCn	Area	(Medium+Heavy)/Light	(Medium+Heavy)/Light Count	(Medium+Heavy)/Light Variability [%]	q-Value	PEP	IonScore	Exp Value	Charge	MH+ [Da]	ΔM [ppm]	RT [min]	# Missed Cleavages
	High	LAADDFR	5	17	3	P13645;Q04695;P08779		0	4.19474e+08				0	0.03254	55.31	5.47662e-05	2	807.399	-0.387348	45.7717	0
	High	VLDELTLAr	1	5	2	Q04695;P08779	C-Term(Label:18O(1))	0	4.23894e+07				0	0.01613	43.01	0.000442531	2	1031.6	0.833	60.3846	0
	High	EVATNSELVQSGK	2	2	1	Q04695		0	4.50607e+06				0	0.01604	29.95	0.014061	2	1361.69	1.58435	39.8586	0
P25705	ATP synthase subunit alpha, mitochondrial OS=Homo sapiens GN=ATP5A1 PE=1 SV=1 - [ATPA_HUMAN]	141.398	13.02	1	6	6	8	1.37748e+07	1.23952	4	23.0926	553	59.7136	9.12939
	A2	Sequence	# PSMs	# Proteins	# Protein Groups	Protein Group Accessions	Modifications	ΔCn	Area	(Medium+Heavy)/Light	(Medium+Heavy)/Light Count	(Medium+Heavy)/Light Variability [%]	q-Value	PEP	IonScore	Exp Value	Charge	MH+ [Da]	ΔM [ppm]	RT [min]	# Missed Cleavages
	High	ILGADTSVDLEETGR	2	1	1	P25705		0	7.98458e+06				0	0.0001714	60.76	1.13747e-05	2	1575.79	-0.362511	59.5659	0
	High	AVDSLVPIGR	2	1	1	P25705		0	17985571	0.943392	1		0	0.004678	40.58	0.000699987	2	1026.6	1.19354	60.318	0
	High	VVDALGNAIDGk	1	1	1	P25705	C-Term(Label:18O(1))	0	1.18457e+07	1.283	1		0	0.01026	32.04	0.009065	2	1173.64	0.300636	55.6443	0
	High	TGAIVDVPVGEELLGR	1	1	1	P25705		0	7.45052e+06	1.72715	1		0	0.02285	30.28	0.00717235	2	1624.89	-0.457381	75.546	0
	High	TSIAIDTIINQK	1	1	1	P25705		0	1.14932e+07				0	0.0259	21.36	0.0698238	2	1316.74	0.224698	66.0705	0
	High	ELIIGDR	1	1	1	P25705		0	364178	1.19751	1		0.005	0.1354	17.68	0.200465	2	815.463	1.46324	49.8457	0
Q13885	Tubulin beta-2A chain OS=Homo sapiens GN=TUBB2A PE=1 SV=1 - [TBB2A_HUMAN]	136.64	13.26	7	3	5	7	4.75186e+07	2.3963	2	78.6864	445	49.875	4.89404
	A2	Sequence	# PSMs	# Proteins	# Protein Groups	Protein Group Accessions	Modifications	ΔCn	Area	(Medium+Heavy)/Light	(Medium+Heavy)/Light Count	(Medium+Heavy)/Light Variability [%]	q-Value	PEP	IonScore	Exp Value	Charge	MH+ [Da]	ΔM [ppm]	RT [min]	# Missed Cleavages
	High	FPGQLNADLr	3	10	2	Q13885;P04350	C-Term(Label:18O(1))	0	5.25536e+06				0	0.0002429	55.02	4.10781e-05	2	1132.6	0.815968	59.5948	0
	High	AILVDLEPGTmDSVR	1	4	1	Q13885	M11(Oxidation)	0	72139168	1.50035	1		0	0.0008186	36.54	0.00339384	2	1631.83	0.0649493	66.5629	0
	High	EVDEQmLNVQNk	1	4	1	Q13885	M6(Oxidation); C-Term(Label:18O(1))	0	65161416	3.82728	1		0	0.005886	16.24	0.223423	2	1464.69	-1.85274	40.407	0
	High	LAVNmVPFPr	1	10	2	Q13885;P04350	M5(Oxidation); C-Term(Label:18O(1))	0	0				0.005	0.1178	28.15	0.0277127	2	1161.64	2.3551	64.4116	0
	High	INVYYNEAAGNk	1	1	1	Q13885	C-Term(Label:18O(1))	0	3.67543e+06				0.005	0.1173	15.91	0.341076	2	1357.67	1.95472	48.822	0
P08779	Keratin, type I cytoskeletal 16 OS=Homo sapiens GN=KRT16 PE=1 SV=4 - [K1C16_HUMAN]	136.363	5.92	12	1	3	7	1.55464e+08				473	51.2362	5.04639
	A2	Sequence	# PSMs	# Proteins	# Protein Groups	Protein Group Accessions	Modifications	ΔCn	Area	(Medium+Heavy)/Light	(Medium+Heavy)/Light Count	(Medium+Heavy)/Light Variability [%]	q-Value	PEP	IonScore	Exp Value	Charge	MH+ [Da]	ΔM [ppm]	RT [min]	# Missed Cleavages
	High	LAADDFR	5	17	3	P13645;Q04695;P08779		0	4.19474e+08				0	0.03254	55.31	5.47662e-05	2	807.399	-0.387348	45.7717	0
	High	VLDELTLAr	1	5	2	Q04695;P08779	C-Term(Label:18O(1))	0	4.23894e+07				0	0.01613	43.01	0.000442531	2	1031.6	0.833	60.3846	0
	High	EVFTSSSSSSSR	1	1	1	P08779		0	4.52751e+06				0	0.01377	23.19	0.0239867	2	1260.57	1.11979	35.3444	0
P13647	Keratin, type II cytoskeletal 5 OS=Homo sapiens GN=KRT5 PE=1 SV=3 - [K2C5_HUMAN]	130.217	5.59	1	3	3	7	2.10971e+07				590	62.34	7.73779
	A2	Sequence	# PSMs	# Proteins	# Protein Groups	Protein Group Accessions	Modifications	ΔCn	Area	(Medium+Heavy)/Light	(Medium+Heavy)/Light Count	(Medium+Heavy)/Light Variability [%]	q-Value	PEP	IonScore	Exp Value	Charge	MH+ [Da]	ΔM [ppm]	RT [min]	# Missed Cleavages
	High	ISISTSGGSFR	2	1	1	P13647		0	6.70909e+06				0	0.02444	45.19	0.00053425	2	1111.58	1.10272	53.3081	0
	High	SFSTASAITPSVSR	2	1	1	P13647		0	1.44947e+07				0	0.00199	39.17	0.00167063	2	1410.72	-0.643752	54.8303	0
	High	TSFTSVSR	3	1	1	P13647		0	4.20874e+07				0	0.01391	27.92	0.0228432	2	884.447	-0.0680047	41.5165	0
P04350	Tubulin beta-4A chain OS=Homo sapiens GN=TUBB4A PE=1 SV=2 - [TBB4A_HUMAN]	128.563	11.49	5	2	4	6	4.08365e+07	1.64593	1		444	49.5539	4.88135
	A2	Sequence	# PSMs	# Proteins	# Protein Groups	Protein Group Accessions	Modifications	ΔCn	Area	(Medium+Heavy)/Light	(Medium+Heavy)/Light Count	(Medium+Heavy)/Light Variability [%]	q-Value	PEP	IonScore	Exp Value	Charge	MH+ [Da]	ΔM [ppm]	RT [min]	# Missed Cleavages
	High	FPGQLNADLr	3	10	2	Q13885;P04350	C-Term(Label:18O(1))	0	5.25536e+06				0	0.0002429	55.02	4.10781e-05	2	1132.6	0.815968	59.5948	0
	High	AVLVDLEPGTmDSVR	1	3	1	P04350	M11(Oxidation)	0	76417620	1.64593	1		0	0.03354	25.24	0.0377025	2	1617.82	0.0055111	64.0059	0
	High	mSmKEVDEQmLSVQSK	1	1	1	P04350	M1(Oxidation); M3(Oxidation); M10(Oxidation)	0	0				0	0.004306	18.63	0.0486663	3	1917.86	-0.451604	46.6655	1
	High	LAVNmVPFPr	1	10	2	Q13885;P04350	M5(Oxidation); C-Term(Label:18O(1))	0	0				0.005	0.1178	28.15	0.0277127	2	1161.64	2.3551	64.4116	0
P80723	Brain acid soluble protein 1 OS=Homo sapiens GN=BASP1 PE=1 SV=2 - [BASP1_HUMAN]	102.13	12.33	1	2	2	4	2.97357e+07	1.91777	1		227	22.68	4.62744
	A2	Sequence	# PSMs	# Proteins	# Protein Groups	Protein Group Accessions	Modifications	ΔCn	Area	(Medium+Heavy)/Light	(Medium+Heavy)/Light Count	(Medium+Heavy)/Light Variability [%]	q-Value	PEP	IonScore	Exp Value	Charge	MH+ [Da]	ΔM [ppm]	RT [min]	# Missed Cleavages
	High	ETPAATEAPSSTPK	3	1	1	P80723		0	57791085				0	0.0008197	49.16	0.000138326	2	1386.68	0.9315	34.1278	0
	High	KTEAPAAPAAQETK	1	1	1	P80723		0	1.68028e+06	1.91777	1		0	0.009713	26.62	0.0276569	3	1412.74	-1.24585	37.7549	1
P63104	14-3-3 protein zeta/delta OS=Homo sapiens GN=YWHAZ PE=1 SV=1 - [1433Z_HUMAN]	93.48	5.71	1	1	1	2	1.08944e+07	1.14397	1		245	27.7277	4.79248
	A2	Sequence	# PSMs	# Proteins	# Protein Groups	Protein Group Accessions	Modifications	ΔCn	Area	(Medium+Heavy)/Light	(Medium+Heavy)/Light Count	(Medium+Heavy)/Light Variability [%]	q-Value	PEP	IonScore	Exp Value	Charge	MH+ [Da]	ΔM [ppm]	RT [min]	# Missed Cleavages
	High	SVTEQGAELSNEER	2	1	1	P63104		0	1.08944e+07	1.14397	1		0	0.01483	61.09	5.01834e-06	2	1548.71	-0.0133365	41.9346	0
Q16555	Dihydropyrimidinase-related protein 2 OS=Homo sapiens GN=DPYSL2 PE=1 SV=1 - [DPYL2_HUMAN]	85.91	4.9	1	3	3	4	1.61342e+07	0.971141	2	24.1115	572	62.2546	6.37939
	A2	Sequence	# PSMs	# Proteins	# Protein Groups	Protein Group Accessions	Modifications	ΔCn	Area	(Medium+Heavy)/Light	(Medium+Heavy)/Light Count	(Medium+Heavy)/Light Variability [%]	q-Value	PEP	IonScore	Exp Value	Charge	MH+ [Da]	ΔM [ppm]	RT [min]	# Missed Cleavages
	High	SSAEVIAQAR	1	1	1	Q16555		0	16720404	1.14003	1		0	0.0457	38.85	0.00186353	2	1031.55	0.207525	40.3185	0
	High	QQAPPVR	2	1	1	Q16555		0	551198				0.005	0.141	31.54	0.0110128	2	795.447	0.217436	28.7903	0
	Medium	GSPLVVISQGK	1	1	1	Q16555		0	31131017	0.827273	1		0.044	0.2492	29.43	0.00752565	2	1084.64	1.92681	56.8069	0
P61981	14-3-3 protein gamma OS=Homo sapiens GN=YWHAG PE=1 SV=2 - [1433G_HUMAN]	81.8826	12.55	5	3	3	6	2.03313e+07	1.17557	2	76.8608	247	28.2849	4.89404
	A2	Sequence	# PSMs	# Proteins	# Protein Groups	Protein Group Accessions	Modifications	ΔCn	Area	(Medium+Heavy)/Light	(Medium+Heavy)/Light Count	(Medium+Heavy)/Light Variability [%]	q-Value	PEP	IonScore	Exp Value	Charge	MH+ [Da]	ΔM [ppm]	RT [min]	# Missed Cleavages
	High	VISSIEQK	3	5	1	P61981		0	54096524	1.17557	2	76.8608	0	0.003666	40.41	0.00175158	2	903.515	-0.0413209	37.8764	0
	High	ATVVESSEK	2	1	1	P61981		0	5.64311e+06				0	0.003067	39.08	0.00196516	2	949.484	0.0420355	27.669	0
	Medium	NVTELNEPLSNEER	1	1	1	P61981		0	1.25426e+06				0.044	0.2456	22.71	0.0559908	2	1643.78	-2.39726	52.6938	0
P17600	Synapsin-1 OS=Homo sapiens GN=SYN1 PE=1 SV=3 - [SYN1_HUMAN]	79.27	2.98	1	2	2	4	8.50051e+06	0.823373	2	24.8494	705	74.0656	9.83252
	A2	Sequence	# PSMs	# Proteins	# Protein Groups	Protein Group Accessions	Modifications	ΔCn	Area	(Medium+Heavy)/Light	(Medium+Heavy)/Light Count	(Medium+Heavy)/Light Variability [%]	q-Value	PEP	IonScore	Exp Value	Charge	MH+ [Da]	ΔM [ppm]	RT [min]	# Missed Cleavages
	High	QASQAGPVPR	3	1	1	P17600		0	2.00832e+06	0.823373	2	24.8494	0	0.002986	37.34	0.00273985	2	1010.54	-1.14059	33.2354	0
	High	QTSVSGPAPPK	1	1	1	P17600		0	14992707				0.005	0.06964	22.26	0.095681	2	1068.57	1.67207	34.4854	0
Q9BQE3	Tubulin alpha-1C chain OS=Homo sapiens GN=TUBA1C PE=1 SV=1 - [TBA1C_HUMAN]	60.8034	3.79	5	1	2	3	6.60625e+07				449	49.8635	5.09717
	A2	Sequence	# PSMs	# Proteins	# Protein Groups	Protein Group Accessions	Modifications	ΔCn	Area	(Medium+Heavy)/Light	(Medium+Heavy)/Light Count	(Medium+Heavy)/Light Variability [%]	q-Value	PEP	IonScore	Exp Value	Charge	MH+ [Da]	ΔM [ppm]	RT [min]	# Missed Cleavages
	High	DVNAAIATIK	2	5	1	Q9BQE3		0	4.89027e+07				0	0.01455	39.86	0.00104309	2	1015.58	0.42401	54.0525	0
	High	LSVDYGk	1	5	2	Q9BQE3;P68366	C-Term(Label:18O(1))	0	8.32224e+07				0.005	0.05265	31.26	0.0162353	2	783.413	0.232887	41.8647	0
P60201	Myelin proteolipid protein OS=Homo sapiens GN=PLP1 PE=1 SV=2 - [MYPR_HUMAN]	59.3633	3.97	1	1	1	3	27514351	1.43341	2	31.8908	277	30.0571	8.35303
	A2	Sequence	# PSMs	# Proteins	# Protein Groups	Protein Group Accessions	Modifications	ΔCn	Area	(Medium+Heavy)/Light	(Medium+Heavy)/Light Count	(Medium+Heavy)/Light Variability [%]	q-Value	PEP	IonScore	Exp Value	Charge	MH+ [Da]	ΔM [ppm]	RT [min]	# Missed Cleavages
	High	GLSATVTGGQk	3	1	1	P60201	C-Term(Label:18O(1))	0	27514351	1.43341	2	31.8908	0	0.008317	38.06	0.00269643	2	1020.56	1.02369	39.7098	0
P02768	Serum albumin OS=Homo sapiens GN=ALB PE=1 SV=2 - [ALBU_HUMAN]	52.49	2.46	1	1	1	1	8.4999e+07				609	69.3215	6.27783
	A2	Sequence	# PSMs	# Proteins	# Protein Groups	Protein Group Accessions	Modifications	ΔCn	Area	(Medium+Heavy)/Light	(Medium+Heavy)/Light Count	(Medium+Heavy)/Light Variability [%]	q-Value	PEP	IonScore	Exp Value	Charge	MH+ [Da]	ΔM [ppm]	RT [min]	# Missed Cleavages
	High	KVPQVSTPTLVEVSR	1	1	1	P02768		0	8.4999e+07				0	2.136e-05	52.49	2.19819e-05	3	1639.94	0.978659	62.6056	1
P61764	Syntaxin-binding protein 1 OS=Homo sapiens GN=STXBP1 PE=1 SV=1 - [STXB1_HUMAN]	51.97	2.19	1	1	1	1	27047832	1.2022	1		594	67.5259	6.96143
	A2	Sequence	# PSMs	# Proteins	# Protein Groups	Protein Group Accessions	Modifications	ΔCn	Area	(Medium+Heavy)/Light	(Medium+Heavy)/Light Count	(Medium+Heavy)/Light Variability [%]	q-Value	PEP	IonScore	Exp Value	Charge	MH+ [Da]	ΔM [ppm]	RT [min]	# Missed Cleavages
	High	SSASFSTTAVSAR	1	1	1	P61764		0	27047832	1.2022	1		0	0.003686	51.97	8.51343e-05	2	1271.62	0.620769	45.0355	0
P68366	Tubulin alpha-4A chain OS=Homo sapiens GN=TUBA4A PE=1 SV=1 - [TBA4A_HUMAN]	50.3626	3.79	1	1	2	2	5.77786e+07	0.877946	1		448	49.8924	5.05908
	A2	Sequence	# PSMs	# Proteins	# Protein Groups	Protein Group Accessions	Modifications	ΔCn	Area	(Medium+Heavy)/Light	(Medium+Heavy)/Light Count	(Medium+Heavy)/Light Variability [%]	q-Value	PEP	IonScore	Exp Value	Charge	MH+ [Da]	ΔM [ppm]	RT [min]	# Missed Cleavages
	High	DVNAAIAAIK	1	1	1	P68366		0	32334808	0.877946	1		0	0.009059	40.29	0.000734293	2	985.568	0.685568	57.2066	0
	High	LSVDYGk	1	5	2	Q9BQE3;P68366	C-Term(Label:18O(1))	0	8.32224e+07				0.005	0.05265	31.26	0.0162353	2	783.413	0.232887	41.8647	0
Q02413	Desmoglein-1 OS=Homo sapiens GN=DSG1 PE=1 SV=2 - [DSG1_HUMAN]	47.64	0.95	1	1	1	2	6579742	0.146945	1		1049	113.676	5.03369
	A2	Sequence	# PSMs	# Proteins	# Protein Groups	Protein Group Accessions	Modifications	ΔCn	Area	(Medium+Heavy)/Light	(Medium+Heavy)/Light Count	(Medium+Heavy)/Light Variability [%]	q-Value	PEP	IonScore	Exp Value	Charge	MH+ [Da]	ΔM [ppm]	RT [min]	# Missed Cleavages
	High	ESSNVVVTER	2	1	1	Q02413		0	6579742	0.146945	1		0	0.001725	44.3	0.000544299	2	1119.56	-0.724639	37.2166	0
P69905	Hemoglobin subunit alpha OS=Homo sapiens GN=HBA1 PE=1 SV=2 - [HBA_HUMAN]	43.1345	9.86	2	2	2	3	5.64605e+06	1.93989	1		142	15.2479	8.67529
	A2	Sequence	# PSMs	# Proteins	# Protein Groups	Protein Group Accessions	Modifications	ΔCn	Area	(Medium+Heavy)/Light	(Medium+Heavy)/Light Count	(Medium+Heavy)/Light Variability [%]	q-Value	PEP	IonScore	Exp Value	Charge	MH+ [Da]	ΔM [ppm]	RT [min]	# Missed Cleavages
	High	VLSPADk	2	1	1	P69905	C-Term(Label:18O(1))	0	0				0	0.01552	39.92	0.00176726	2	731.417	-2.13369	31.1822	0
	High	VDPVNFk	1	2	1	P69905	C-Term(Label:18O(1))	0	5.64605e+06	1.93989	1		0.005	0.08791	29.2	0.0288543	2	820.445	0.106799	47.7536	0
Q15233	Non-POU domain-containing octamer-binding protein OS=Homo sapiens GN=NONO PE=1 SV=4 - [NONO_HUMAN]	42.53	1.7	2	1	1	1	4966553				471	54.1973	8.95361
	A2	Sequence	# PSMs	# Proteins	# Protein Groups	Protein Group Accessions	Modifications	ΔCn	Area	(Medium+Heavy)/Light	(Medium+Heavy)/Light Count	(Medium+Heavy)/Light Variability [%]	q-Value	PEP	IonScore	Exp Value	Charge	MH+ [Da]	ΔM [ppm]	RT [min]	# Missed Cleavages
	Medium	AVVIVDDR	1	2	1	Q15233		0	4966553				0.044	0.211	42.53	0.00074835	2	886.499	-0.202176	45.2904	0
P16520	Guanine nucleotide-binding protein G(I)/G(S)/G(T) subunit beta-3 OS=Homo sapiens GN=GNB3 PE=1 SV=1 - [GBB3_HUMAN]	40.71	2.94	4	1	1	1	2.84829e+07				340	37.1969	5.66846
	A2	Sequence	# PSMs	# Proteins	# Protein Groups	Protein Group Accessions	Modifications	ΔCn	Area	(Medium+Heavy)/Light	(Medium+Heavy)/Light Count	(Medium+Heavy)/Light Variability [%]	q-Value	PEP	IonScore	Exp Value	Charge	MH+ [Da]	ΔM [ppm]	RT [min]	# Missed Cleavages
	Medium	LLVSASQDGk	1	4	1	P16520	C-Term(Label:18O(1))	0	2.84829e+07				0.044	0.214	40.71	0.00134171	2	1019.56	0.795767	41.2997	0
Q9UQM7	Calcium/calmodulin-dependent protein kinase type II subunit alpha OS=Homo sapiens GN=CAMK2A PE=1 SV=2 - [KCC2A_HUMAN]	39.14	1.88	1	1	1	2	118610032				478	54.0535	7.07861
	A2	Sequence	# PSMs	# Proteins	# Protein Groups	Protein Group Accessions	Modifications	ΔCn	Area	(Medium+Heavy)/Light	(Medium+Heavy)/Light Count	(Medium+Heavy)/Light Variability [%]	q-Value	PEP	IonScore	Exp Value	Charge	MH+ [Da]	ΔM [ppm]	RT [min]	# Missed Cleavages
	High	SGAPSVLPH	2	1	1	Q9UQM7		0	118610032				0	0.0212	19.86	0.249412	2	864.457	-0.407714	45.8273	0
P10809	60 kDa heat shock protein, mitochondrial OS=Homo sapiens GN=HSPD1 PE=1 SV=2 - [CH60_HUMAN]	38.84	1.57	1	1	1	1	5.17564e+06				573	61.0164	5.87158
	A2	Sequence	# PSMs	# Proteins	# Protein Groups	Protein Group Accessions	Modifications	ΔCn	Area	(Medium+Heavy)/Light	(Medium+Heavy)/Light Count	(Medium+Heavy)/Light Variability [%]	q-Value	PEP	IonScore	Exp Value	Charge	MH+ [Da]	ΔM [ppm]	RT [min]	# Missed Cleavages
	Medium	VTDALNATR	1	1	1	P10809		0	5.17564e+06				0.041	0.2024	38.84	0.00208987	2	960.511	0.488113	38.8981	0
P02538	Keratin, type II cytoskeletal 6A OS=Homo sapiens GN=KRT6A PE=1 SV=3 - [K2C6A_HUMAN]	37.31	4.61	4	1	2	2	8.08417e+06				564	60.0083	8.00146
	A2	Sequence	# PSMs	# Proteins	# Protein Groups	Protein Group Accessions	Modifications	ΔCn	Area	(Medium+Heavy)/Light	(Medium+Heavy)/Light Count	(Medium+Heavy)/Light Variability [%]	q-Value	PEP	IonScore	Exp Value	Charge	MH+ [Da]	ΔM [ppm]	RT [min]	# Missed Cleavages
	High	AQYEEIAQR	1	6	2	P35908;P02538		0	8.08417e+06				0.005	0.0775	24.9	0.043038	2	1107.54	1.60177	41.3537	0
	Medium	AIGGGLSSVGGGSSTIK	1	2	1	P02538		0	0				0.044	0.2466	28.41	0.0162238	2	1447.78	1.35788	53.6501	0
P06576	ATP synthase subunit beta, mitochondrial OS=Homo sapiens GN=ATP5B PE=1 SV=3 - [ATPB_HUMAN]	36.8989	5.86	1	3	3	3	1.1067e+07	1.43236	2	48.5681	529	56.5246	5.40186
	A2	Sequence	# PSMs	# Proteins	# Protein Groups	Protein Group Accessions	Modifications	ΔCn	Area	(Medium+Heavy)/Light	(Medium+Heavy)/Light Count	(Medium+Heavy)/Light Variability [%]	q-Value	PEP	IonScore	Exp Value	Charge	MH+ [Da]	ΔM [ppm]	RT [min]	# Missed Cleavages
	High	VLDSGAPIk	1	1	1	P06576	C-Term(Label:18O(1))	0	15712267	1.05014	1		0.005	0.09803	33.45	0.00542227	2	901.524	0.424049	43.5814	0
	High	TIAmDGTEGLVR	1	1	1	P06576	M4(Oxidation)	0	3.05818e+06				0.005	0.09698	22.35	0.0780018	2	1278.63	-1.52316	49.9937	0
	High	VVDLLAPYAk	1	1	1	P06576	C-Term(Label:18O(1))	0	14430558	1.9537	1		0.005	0.144	12.38	0.575206	2	1090.64	0.571111	68.2425	0
Q15836	Vesicle-associated membrane protein 3 OS=Homo sapiens GN=VAMP3 PE=1 SV=3 - [VAMP3_HUMAN]	36.85	7	3	1	1	1					100	11.302	8.79248
	A2	Sequence	# PSMs	# Proteins	# Protein Groups	Protein Group Accessions	Modifications	ΔCn	Area	(Medium+Heavy)/Light	(Medium+Heavy)/Light Count	(Medium+Heavy)/Light Variability [%]	q-Value	PEP	IonScore	Exp Value	Charge	MH+ [Da]	ΔM [ppm]	RT [min]	# Missed Cleavages
	High	LSELDDr	1	3	1	Q15836	C-Term(Label:18O(1))	0	0				0	0.03846	36.85	0.0019208	2	849.419	-0.825603	38.2776	0
P07339	Cathepsin D OS=Homo sapiens GN=CTSD PE=1 SV=1 - [CATD_HUMAN]	36.67	1.94	1	1	1	1	1.25389e+06	0.184348	1		412	44.5236	6.53662
	A2	Sequence	# PSMs	# Proteins	# Protein Groups	Protein Group Accessions	Modifications	ΔCn	Area	(Medium+Heavy)/Light	(Medium+Heavy)/Light Count	(Medium+Heavy)/Light Variability [%]	q-Value	PEP	IonScore	Exp Value	Charge	MH+ [Da]	ΔM [ppm]	RT [min]	# Missed Cleavages
	Medium	VGFAEAAR	1	1	1	P07339		0	1.25389e+06	0.184348	1		0.038	0.1902	36.67	0.00494063	2	820.431	-0.633373	43.3868	0
P28482	Mitogen-activated protein kinase 1 OS=Homo sapiens GN=MAPK1 PE=1 SV=3 - [MK01_HUMAN]	36.54	2.5	1	1	1	1					360	41.3632	6.97607
	A2	Sequence	# PSMs	# Proteins	# Protein Groups	Protein Group Accessions	Modifications	ΔCn	Area	(Medium+Heavy)/Light	(Medium+Heavy)/Light Count	(Medium+Heavy)/Light Variability [%]	q-Value	PEP	IonScore	Exp Value	Charge	MH+ [Da]	ΔM [ppm]	RT [min]	# Missed Cleavages
	High	GQVFDVGPR	1	1	1	P28482		0	0				0	0.02621	36.54	0.00302784	2	974.505	-0.92057	53.3097	0
P12277	Creatine kinase B-type OS=Homo sapiens GN=CKB PE=1 SV=1 - [KCRB_HUMAN]	35.8	3.94	1	1	1	1	9.99548e+06	1.55991	1		381	42.6173	5.59229
	A2	Sequence	# PSMs	# Proteins	# Protein Groups	Protein Group Accessions	Modifications	ΔCn	Area	(Medium+Heavy)/Light	(Medium+Heavy)/Light Count	(Medium+Heavy)/Light Variability [%]	q-Value	PEP	IonScore	Exp Value	Charge	MH+ [Da]	ΔM [ppm]	RT [min]	# Missed Cleavages
	Medium	LEQGQAIDDLmPAQK	1	1	1	P12277	M11(Oxidation)	0	9.99548e+06	1.55991	1		0.022	0.1671	35.8	0.00336674	2	1672.82	1.20241	51.5608	0
P60709	Actin, cytoplasmic 1 OS=Homo sapiens GN=ACTB PE=1 SV=1 - [ACTB_HUMAN]	34.01	4.8	7	2	2	2	2.08022e+07	5.43514	2	145.991	375	41.7097	5.47803
	A2	Sequence	# PSMs	# Proteins	# Protein Groups	Protein Group Accessions	Modifications	ΔCn	Area	(Medium+Heavy)/Light	(Medium+Heavy)/Light Count	(Medium+Heavy)/Light Variability [%]	q-Value	PEP	IonScore	Exp Value	Charge	MH+ [Da]	ΔM [ppm]	RT [min]	# Missed Cleavages
	High	GYSFTTTAEr	1	2	1	P60709	C-Term(Label:18O(1))	0	1.27176e+07	11.173	1		0	0.009083	34.01	0.00335627	2	1134.53	-0.996364	48.2793	0
	High	DLTDYLmk	1	7	1	P60709	M7(Oxidation); C-Term(Label:18O(1))	0	28886821	2.64393	1		0.005	0.0645	15.81	0.232243	2	1016.49	0.128877	59.0345	0
P21281	V-type proton ATPase subunit B, brain isoform OS=Homo sapiens GN=ATP6V1B2 PE=1 SV=3 - [VATB2_HUMAN]	32.3333	6.65	1	3	3	3	6.68193e+06				511	56.4649	5.80811
	A2	Sequence	# PSMs	# Proteins	# Protein Groups	Protein Group Accessions	Modifications	ΔCn	Area	(Medium+Heavy)/Light	(Medium+Heavy)/Light Count	(Medium+Heavy)/Light Variability [%]	q-Value	PEP	IonScore	Exp Value	Charge	MH+ [Da]	ΔM [ppm]	RT [min]	# Missed Cleavages
	High	SGQVLEVSGSK	1	1	1	P21281		0	8.53703e+06				0	0.02939	16.88	0.311777	2	1090.57	-2.93882	40.6008	0
	High	EQALAVSR	1	1	1	P21281		0	0				0.005	0.1321	26.26	0.0385645	2	873.478	-1.08581	37.2529	0
	Medium	AVVQVFEGTSGIDAK	1	1	1	P21281		0	4.82684e+06				0.038	0.1876	19.86	0.132193	2	1520.8	0.881971	62.9862	0
P11488	Guanine nucleotide-binding protein G(t) subunit alpha-1 OS=Homo sapiens GN=GNAT1 PE=1 SV=5 - [GNAT1_HUMAN]	28.51	3.14	12	1	1	1	1.8162e+07				350	40.015	5.61768
	A2	Sequence	# PSMs	# Proteins	# Protein Groups	Protein Group Accessions	Modifications	ΔCn	Area	(Medium+Heavy)/Light	(Medium+Heavy)/Light Count	(Medium+Heavy)/Light Variability [%]	q-Value	PEP	IonScore	Exp Value	Charge	MH+ [Da]	ΔM [ppm]	RT [min]	# Missed Cleavages
	High	LLLLGAGESGK	1	12	1	P11488		0	1.8162e+07				0.005	0.08179	28.51	0.0100764	2	1057.63	1.76952	63.3979	0
P52272	Heterogeneous nuclear ribonucleoprotein M OS=Homo sapiens GN=HNRNPM PE=1 SV=3 - [HNRPM_HUMAN]	24.95	0.96	1	1	1	1	2.63819e+06				730	77.4643	8.70459
	A2	Sequence	# PSMs	# Proteins	# Protein Groups	Protein Group Accessions	Modifications	ΔCn	Area	(Medium+Heavy)/Light	(Medium+Heavy)/Light Count	(Medium+Heavy)/Light Variability [%]	q-Value	PEP	IonScore	Exp Value	Charge	MH+ [Da]	ΔM [ppm]	RT [min]	# Missed Cleavages
	High	mGPAIER	1	1	1	P52272	M1(Oxidation)	0	2.63819e+06				0	0.03898	24.95	0.0335884	2	789.392	-0.727184	33.6589	0
Q8TF72	Protein Shroom3 OS=Homo sapiens GN=SHROOM3 PE=1 SV=2 - [SHRM3_HUMAN]	24.81	0.45	1	1	1	2	3.6418e+07				1996	216.724	7.79639
	A2	Sequence	# PSMs	# Proteins	# Protein Groups	Protein Group Accessions	Modifications	ΔCn	Area	(Medium+Heavy)/Light	(Medium+Heavy)/Light Count	(Medium+Heavy)/Light Variability [%]	q-Value	PEP	IonScore	Exp Value	Charge	MH+ [Da]	ΔM [ppm]	RT [min]	# Missed Cleavages
	Medium	SSPATADKR	2	1	1	Q8TF72		0	3.6418e+07				0.041	0.207	18.45	0.191472	2	932.479	-0.163595	30.5847	1
P09936	Ubiquitin carboxyl-terminal hydrolase isozyme L1 OS=Homo sapiens GN=UCHL1 PE=1 SV=2 - [UCHL1_HUMAN]	22.42	4.48	1	1	1	1	13042940	2.50358	1		223	24.8085	5.47803
	A2	Sequence	# PSMs	# Proteins	# Protein Groups	Protein Group Accessions	Modifications	ΔCn	Area	(Medium+Heavy)/Light	(Medium+Heavy)/Light Count	(Medium+Heavy)/Light Variability [%]	q-Value	PEP	IonScore	Exp Value	Charge	MH+ [Da]	ΔM [ppm]	RT [min]	# Missed Cleavages
	High	LGFEDGSVLk	1	1	1	P09936	C-Term(Label:18O(1))	0	13042940	2.50358	1		0	0.013	22.42	0.10253	2	1066.57	1.04752	62.4742	0
Q00839	Heterogeneous nuclear ribonucleoprotein U OS=Homo sapiens GN=HNRNPU PE=1 SV=6 - [HNRPU_HUMAN]	22.25	1.82	1	1	1	1	1.75145e+06				825	90.528	5.99854
	A2	Sequence	# PSMs	# Proteins	# Protein Groups	Protein Group Accessions	Modifications	ΔCn	Area	(Medium+Heavy)/Light	(Medium+Heavy)/Light Count	(Medium+Heavy)/Light Variability [%]	q-Value	PEP	IonScore	Exp Value	Charge	MH+ [Da]	ΔM [ppm]	RT [min]	# Missed Cleavages
	High	NFILDQTNVSAAAQR	1	1	1	Q00839		0	1.75145e+06				0.005	0.1481	22.25	0.0896472	2	1647.85	0.392848	62.3686	0
O60814	Histone H2B type 1-K OS=Homo sapiens GN=HIST1H2BK PE=1 SV=3 - [H2B1K_HUMAN]	21.76	7.14	15	1	1	1	24579178				126	13.8816	10.3159
	A2	Sequence	# PSMs	# Proteins	# Protein Groups	Protein Group Accessions	Modifications	ΔCn	Area	(Medium+Heavy)/Light	(Medium+Heavy)/Light Count	(Medium+Heavy)/Light Variability [%]	q-Value	PEP	IonScore	Exp Value	Charge	MH+ [Da]	ΔM [ppm]	RT [min]	# Missed Cleavages
	High	LLLPGELAK	1	15	1	O60814		0	24579178				0.005	0.06721	21.76	0.0183372	2	953.603	0.152802	66.2113	0
P11137	Microtubule-associated protein 2 OS=Homo sapiens GN=MAP2 PE=1 SV=4 - [MAP2_HUMAN]	17.5	0.66	1	1	1	1	32619943				1827	199.404	4.90674
	A2	Sequence	# PSMs	# Proteins	# Protein Groups	Protein Group Accessions	Modifications	ΔCn	Area	(Medium+Heavy)/Light	(Medium+Heavy)/Light Count	(Medium+Heavy)/Light Variability [%]	q-Value	PEP	IonScore	Exp Value	Charge	MH+ [Da]	ΔM [ppm]	RT [min]	# Missed Cleavages
	High	SVPSETVVEDSR	1	1	1	P11137		0	32619943				0.005	0.1133	17.5	0.28897	2	1304.64	2.86132	43.8329	0
O60313	Dynamin-like 120 kDa protein, mitochondrial OS=Homo sapiens GN=OPA1 PE=1 SV=3 - [OPA1_HUMAN]	16.93	1.15	1	1	1	1	1.06963e+06				960	111.561	7.86963
	A2	Sequence	# PSMs	# Proteins	# Protein Groups	Protein Group Accessions	Modifications	ΔCn	Area	(Medium+Heavy)/Light	(Medium+Heavy)/Light Count	(Medium+Heavy)/Light Variability [%]	q-Value	PEP	IonScore	Exp Value	Charge	MH+ [Da]	ΔM [ppm]	RT [min]	# Missed Cleavages
	Medium	VVVVGDQSAGK	1	1	1	O60313		0	1.06963e+06				0.044	0.223	16.93	0.30618	2	1058.59	2.5773	37.3551	0
P32119	Peroxiredoxin-2 OS=Homo sapiens GN=PRDX2 PE=1 SV=5 - [PRDX2_HUMAN]	16.57	5.56	2	1	1	1	1.9953e+06				198	21.8782	5.97314
	A2	Sequence	# PSMs	# Proteins	# Protein Groups	Protein Group Accessions	Modifications	ΔCn	Area	(Medium+Heavy)/Light	(Medium+Heavy)/Light Count	(Medium+Heavy)/Light Variability [%]	q-Value	PEP	IonScore	Exp Value	Charge	MH+ [Da]	ΔM [ppm]	RT [min]	# Missed Cleavages
	High	QITVNDLPVGR	1	2	1	P32119		0	1.9953e+06				0.005	0.1454	16.57	0.21809	2	1211.68	1.9494	59.6842	0
P14618	Pyruvate kinase isozymes M1/M2 OS=Homo sapiens GN=PKM PE=1 SV=4 - [KPYM_HUMAN]	13.17	3.39	1	1	1	1	4.89568e+06	3.03029	1		531	57.9	7.84033
	A2	Sequence	# PSMs	# Proteins	# Protein Groups	Protein Group Accessions	Modifications	ΔCn	Area	(Medium+Heavy)/Light	(Medium+Heavy)/Light Count	(Medium+Heavy)/Light Variability [%]	q-Value	PEP	IonScore	Exp Value	Charge	MH+ [Da]	ΔM [ppm]	RT [min]	# Missed Cleavages
	High	KGVNLPGAAVDLPAVSEk	1	1	1	P14618	C-Term(Label:18O(1))	0	4.89568e+06	3.03029	1		0	0.01532	13.17	0.216877	3	1766.99	0.79613	66.8177	1
Q01082	Spectrin beta chain, non-erythrocytic 1 OS=Homo sapiens GN=SPTBN1 PE=1 SV=2 - [SPTB2_HUMAN]	0	0.76	1	2	2	2	1.52095e+06				2364	274.439	5.56689
	A2	Sequence	# PSMs	# Proteins	# Protein Groups	Protein Group Accessions	Modifications	ΔCn	Area	(Medium+Heavy)/Light	(Medium+Heavy)/Light Count	(Medium+Heavy)/Light Variability [%]	q-Value	PEP	IonScore	Exp Value	Charge	MH+ [Da]	ΔM [ppm]	RT [min]	# Missed Cleavages
	High	VAVVNQIAR	1	1	1	Q01082		0	866856				0.005	0.08796	17.42	0.0570572	2	969.585	1.31233	46.9493	0
	Medium	VQAVVAVAR	1	1	1	Q01082		0	2.17505e+06				0.022	0.1634	15.48	0.0849418	2	912.566	3.24034	44.6053	0
O75494	Serine/arginine-rich splicing factor 10 OS=Homo sapiens GN=SRSF10 PE=1 SV=1 - [SRS10_HUMAN]	0	4.58	1	1	1	1	1.47533e+06				262	31.2818	11.2681
	A2	Sequence	# PSMs	# Proteins	# Protein Groups	Protein Group Accessions	Modifications	ΔCn	Area	(Medium+Heavy)/Light	(Medium+Heavy)/Light Count	(Medium+Heavy)/Light Variability [%]	q-Value	PEP	IonScore	Exp Value	Charge	MH+ [Da]	ΔM [ppm]	RT [min]	# Missed Cleavages
	Medium	YLRPPNTSLFVr	1	1	1	O75494	C-Term(Label:18O(2))	0	1.47533e+06				0.041	0.1974	14.42	0.222267	2	1466.83	0.546052	74.0588	0

## Sheet: AD3
Accession	Description	Score	Coverage	# Proteins	# Unique Peptides	# Peptides	# PSMs	Area	(Medium+Heavy)/Light	(Medium+Heavy)/Light Count	(Medium+Heavy)/Light Variability [%]	# AAs	MW [kDa]	calc. pI
P04264	Keratin, type II cytoskeletal 1 OS=Homo sapiens GN=KRT1 PE=1 SV=6 - [K2C1_HUMAN]	360.831	3.42	1	2	2	11	1.37381e+07				644	65.999	8.11865
	A2	Sequence	# PSMs	# Proteins	# Protein Groups	Protein Group Accessions	Modifications	ΔCn	Area	(Medium+Heavy)/Light	(Medium+Heavy)/Light Count	(Medium+Heavy)/Light Variability [%]	q-Value	PEP	IonScore	Exp Value	Charge	MH+ [Da]	ΔM [ppm]	RT [min]	# Missed Cleavages
	High	GSGGGSSGGSIGGR	10	1	1	P04264		0	1.37381e+07				0	0.01672	88.7	8.9706e-09	2	1092.5	0.283868	23.2101	0
	High	SISISVAR	1	1	1	P04264		0	0				0	0.3222	20.73	0.142007	2	832.492	3.91554	47.9737	0
P35527	Keratin, type I cytoskeletal 9 OS=Homo sapiens GN=KRT9 PE=1 SV=3 - [K1C9_HUMAN]	225.34	8.03	1	4	4	11	6.32757e+06				623	62.0268	5.23682
	A2	Sequence	# PSMs	# Proteins	# Protein Groups	Protein Group Accessions	Modifications	ΔCn	Area	(Medium+Heavy)/Light	(Medium+Heavy)/Light Count	(Medium+Heavy)/Light Variability [%]	q-Value	PEP	IonScore	Exp Value	Charge	MH+ [Da]	ΔM [ppm]	RT [min]	# Missed Cleavages
	High	SGGGGGGGLGSGGSIR	3	1	1	P35527		0	7.69359e+06				0	0.00141723	64.7	3.32067e-06	2	1232.6	0.0459918	35.7735	0
	High	FSSSSGYGGGSSR	1	1	1	P35527		0	0				0	0.01187	47.41	5.265e-05	2	1235.53	-0.713598	32.404	0
	High	FSSSGGGGGGGR	6	1	1	P35527		0	4.96155e+06				0	0.06421	33.64	0.00240045	2	982.434	-0.246349	18.6604	0
	Medium	TLLDIDNTR	1	1	1	P35527		0	0				0.031	0.3742	25.07	0.0791932	2	1060.57	1.76495	55.8188	0
P16520	Guanine nucleotide-binding protein G(I)/G(S)/G(T) subunit beta-3 OS=Homo sapiens GN=GNB3 PE=1 SV=1 - [GBB3_HUMAN]	105.088	2.94	4	1	1	2	7.89909e+06	0.90425	1		340	37.1969	5.66846
	A2	Sequence	# PSMs	# Proteins	# Protein Groups	Protein Group Accessions	Modifications	ΔCn	Area	(Medium+Heavy)/Light	(Medium+Heavy)/Light Count	(Medium+Heavy)/Light Variability [%]	q-Value	PEP	IonScore	Exp Value	Charge	MH+ [Da]	ΔM [ppm]	RT [min]	# Missed Cleavages
	High	LLVSASQDGk	2	4	1	P16520	C-Term(Label:18O(1))	0	7.89909e+06	0.90425	1		0	0.02257	63.88	6.81419e-06	2	1019.56	1.27468	39.1073	0
Q9BQE3	Tubulin alpha-1C chain OS=Homo sapiens GN=TUBA1C PE=1 SV=1 - [TBA1C_HUMAN]	95.1818	5.35	7	1	3	5	4.12824e+07	1.25287	1		449	49.8635	5.09717
	A2	Sequence	# PSMs	# Proteins	# Protein Groups	Protein Group Accessions	Modifications	ΔCn	Area	(Medium+Heavy)/Light	(Medium+Heavy)/Light Count	(Medium+Heavy)/Light Variability [%]	q-Value	PEP	IonScore	Exp Value	Charge	MH+ [Da]	ΔM [ppm]	RT [min]	# Missed Cleavages
	High	DVNAAIATIk	3	5	1	Q9BQE3	C-Term(Label:18O(1))	0	4.12824e+07	1.25287	1		0	0.02647	41.57	0.000818536	2	1017.58	1.16894	52.3385	0
	High	LSVDYGk	1	5	2	Q9BQE3;P68366	C-Term(Label:18O(1))	0	0				0	0.2828	33.86	0.00832578	2	783.413	-0.0787495	39.4847	0
	High	FDLmYAk	1	8	2	Q9BQE3;P68366	M4(Oxidation); C-Term(Label:18O(1))	0	0				0	0.1677	24.21	0.034897	2	905.433	0.479943	53.0008	0
P14136	Glial fibrillary acidic protein OS=Homo sapiens GN=GFAP PE=1 SV=1 - [GFAP_HUMAN]	88.32	10.88	1	5	5	7	6.12271e+06	2.70722	3	86.8798	432	49.8496	5.51611
	A2	Sequence	# PSMs	# Proteins	# Protein Groups	Protein Group Accessions	Modifications	ΔCn	Area	(Medium+Heavy)/Light	(Medium+Heavy)/Light Count	(Medium+Heavy)/Light Variability [%]	q-Value	PEP	IonScore	Exp Value	Charge	MH+ [Da]	ΔM [ppm]	RT [min]	# Missed Cleavages
	High	EAASYQEALAR	1	1	1	P14136		0	5.55458e+06	2.70722	1		0	0.01996	46.23	0.00030851	2	1208.59	2.51054	44.0962	0
	High	FADLTDAAAr	1	1	1	P14136	C-Term(Label:18O(2))	0	0				0	0.2638	30.93	0.0110591	2	1054.53	1.22832	49.3118	0
	High	mPPPLPTr	2	1	1	P14136	M1(Oxidation); C-Term(Label:18O(1))	0	1.22764e+07	1.63251	1		0	0.1321	25.6	0.0380084	2	926.501	-0.857365	40.1106	0
	High	QEADEATLAr	1	1	1	P14136	C-Term(Label:18O(1))	0	537118	7.49728	1		0	0.1146	20.93	0.0783018	2	1105.54	1.97629	40.2687	0
	High	ELQEQLAr	2	1	1	P14136	C-Term(Label:18O(1))	0	0				0	0.2299	19.81	0.164021	2	988.533	1.89585	39.2247	0
P69905	Hemoglobin subunit alpha OS=Homo sapiens GN=HBA1 PE=1 SV=2 - [HBA_HUMAN]	85.7109	4.93	1	1	1	4					142	15.2479	8.67529
	A2	Sequence	# PSMs	# Proteins	# Protein Groups	Protein Group Accessions	Modifications	ΔCn	Area	(Medium+Heavy)/Light	(Medium+Heavy)/Light Count	(Medium+Heavy)/Light Variability [%]	q-Value	PEP	IonScore	Exp Value	Charge	MH+ [Da]	ΔM [ppm]	RT [min]	# Missed Cleavages
	High	VLSPADk	4	1	1	P69905	C-Term(Label:18O(1))	0	0				0	0.0904	40.59	0.00157135	2	731.419	0.202846	29.7855	0
P60201	Myelin proteolipid protein OS=Homo sapiens GN=PLP1 PE=1 SV=2 - [MYPR_HUMAN]	81.8	3.97	1	1	1	3					277	30.0571	8.35303
	A2	Sequence	# PSMs	# Proteins	# Protein Groups	Protein Group Accessions	Modifications	ΔCn	Area	(Medium+Heavy)/Light	(Medium+Heavy)/Light Count	(Medium+Heavy)/Light Variability [%]	q-Value	PEP	IonScore	Exp Value	Charge	MH+ [Da]	ΔM [ppm]	RT [min]	# Missed Cleavages
	High	GLSATVTGGQk	3	1	1	P60201	C-Term(Label:18O(1))	0	0				0	0.244	41.62	0.00107774	2	1020.56	0.963882	36.2996	0
P60709	Actin, cytoplasmic 1 OS=Homo sapiens GN=ACTB PE=1 SV=1 - [ACTB_HUMAN]	68.7606	9.6	11	4	4	5	5.12327e+07	1.88149	1		375	41.7097	5.47803
	A2	Sequence	# PSMs	# Proteins	# Protein Groups	Protein Group Accessions	Modifications	ΔCn	Area	(Medium+Heavy)/Light	(Medium+Heavy)/Light Count	(Medium+Heavy)/Light Variability [%]	q-Value	PEP	IonScore	Exp Value	Charge	MH+ [Da]	ΔM [ppm]	RT [min]	# Missed Cleavages
	High	EITALAPSTmk	2	6	1	P60709	M10(Oxidation); C-Term(Label:18O(1))	0	83910908				0	0.03571	37.99	0.0025655	2	1179.62	1.33596	44.2207	0
	High	DLTDYLmk	1	7	1	P60709	M7(Oxidation); C-Term(Label:18O(1))	0	1.85546e+07	1.88149	1		0	0.1661	22.55	0.0461401	2	1016.49	0.789375	57.7476	0
	High	IIAPPEr	1	7	1	P60709	C-Term(Label:18O(1))	0	0				0	0.2599	21.45	0.0390298	2	797.476	-0.455703	39.8338	0
	High	AGFAGDDAPr	1	10	1	P60709	C-Term(Label:18O(1))	0	0				0	0.1871	17.8	0.129448	2	978.452	-0.534859	38.7372	0
Q13885	Tubulin beta-2A chain OS=Homo sapiens GN=TUBB2A PE=1 SV=1 - [TBB2A_HUMAN]	59.42	4.94	6	1	2	2					445	49.875	4.89404
	A2	Sequence	# PSMs	# Proteins	# Protein Groups	Protein Group Accessions	Modifications	ΔCn	Area	(Medium+Heavy)/Light	(Medium+Heavy)/Light Count	(Medium+Heavy)/Light Variability [%]	q-Value	PEP	IonScore	Exp Value	Charge	MH+ [Da]	ΔM [ppm]	RT [min]	# Missed Cleavages
	High	FPGQLNADLr	1	10	2	Q13885;P04350	C-Term(Label:18O(1))	0	0				0	0.04631	45.25	0.000385114	2	1132.6	0.492632	58.0514	0
	High	INVYYNEAAGNk	1	1	1	Q13885	C-Term(Label:18O(1))	0	0				0	0.1413	28.67	0.0179977	2	1357.66	-3.17028	46.4952	0
P04350	Tubulin beta-4A chain OS=Homo sapiens GN=TUBB4A PE=1 SV=2 - [TBB4A_HUMAN]	54.74	4.95	9	1	2	2					444	49.5539	4.88135
	A2	Sequence	# PSMs	# Proteins	# Protein Groups	Protein Group Accessions	Modifications	ΔCn	Area	(Medium+Heavy)/Light	(Medium+Heavy)/Light Count	(Medium+Heavy)/Light Variability [%]	q-Value	PEP	IonScore	Exp Value	Charge	MH+ [Da]	ΔM [ppm]	RT [min]	# Missed Cleavages
	High	FPGQLNADLr	1	10	2	Q13885;P04350	C-Term(Label:18O(1))	0	0				0	0.04631	45.25	0.000385114	2	1132.6	0.492632	58.0514	0
	High	ImNTFSVVPSPk	1	4	1	P04350	M2(Oxidation); C-Term(Label:18O(1))	0	0				0	0.05716	23.99	0.0534693	2	1337.7	0.502367	57.6538	0
P68366	Tubulin alpha-4A chain OS=Homo sapiens GN=TUBA4A PE=1 SV=1 - [TBA4A_HUMAN]	49.2915	5.36	3	1	3	3	1.32885e+07	1.05037	1		448	49.8924	5.05908
	A2	Sequence	# PSMs	# Proteins	# Protein Groups	Protein Group Accessions	Modifications	ΔCn	Area	(Medium+Heavy)/Light	(Medium+Heavy)/Light Count	(Medium+Heavy)/Light Variability [%]	q-Value	PEP	IonScore	Exp Value	Charge	MH+ [Da]	ΔM [ppm]	RT [min]	# Missed Cleavages
	High	DVNAAIAAIk	1	1	1	P68366	C-Term(Label:18O(1))	0	1.32885e+07	1.05037	1		0	0.0342	34.37	0.00385703	2	987.572	-0.0306683	55.5532	0
	High	LSVDYGk	1	5	2	Q9BQE3;P68366	C-Term(Label:18O(1))	0	0				0	0.2828	33.86	0.00832578	2	783.413	-0.0787495	39.4847	0
	High	FDLmYAk	1	8	2	Q9BQE3;P68366	M4(Oxidation); C-Term(Label:18O(1))	0	0				0	0.1677	24.21	0.034897	2	905.433	0.479943	53.0008	0
Q9UQM7	Calcium/calmodulin-dependent protein kinase type II subunit alpha OS=Homo sapiens GN=CAMK2A PE=1 SV=2 - [KCC2A_HUMAN]	45.7	8.16	1	4	4	5	5.58653e+06	1.72294	1		478	54.0535	7.07861
	A2	Sequence	# PSMs	# Proteins	# Protein Groups	Protein Group Accessions	Modifications	ΔCn	Area	(Medium+Heavy)/Light	(Medium+Heavy)/Light Count	(Medium+Heavy)/Light Variability [%]	q-Value	PEP	IonScore	Exp Value	Charge	MH+ [Da]	ΔM [ppm]	RT [min]	# Missed Cleavages
	High	ITQYLDAGGIPr	1	1	1	Q9UQM7	C-Term(Label:18O(1))	0	8.75854e+06				0	0.03127	30.1	0.0119712	2	1305.71	0.921276	57.8434	0
	High	SGAPSVLPH	1	1	1	Q9UQM7		0	5688566				0	0.09445	29.6	0.0264799	2	864.457	-0.125293	43.6372	0
	High	VLAGQEYAAk	1	1	1	Q9UQM7	C-Term(Label:18O(1))	0	2.31248e+06	1.72294	1		0	0.2447	22.69	0.0753578	2	1051.57	0.642072	37.3555	0
	High	ITAAEALk	2	1	1	Q9UQM7	C-Term(Label:18O(1))	0	0				0	0.1061	21.77	0.100456	2	818.487	-0.0419434	42.1034	0
P06576	ATP synthase subunit beta, mitochondrial OS=Homo sapiens GN=ATP5B PE=1 SV=3 - [ATPB_HUMAN]	43.0589	3.59	1	2	2	2	5.24292e+06	2.33968	1		529	56.5246	5.40186
	A2	Sequence	# PSMs	# Proteins	# Protein Groups	Protein Group Accessions	Modifications	ΔCn	Area	(Medium+Heavy)/Light	(Medium+Heavy)/Light Count	(Medium+Heavy)/Light Variability [%]	q-Value	PEP	IonScore	Exp Value	Charge	MH+ [Da]	ΔM [ppm]	RT [min]	# Missed Cleavages
	High	VLDSGAPIk	1	1	1	P06576	C-Term(Label:18O(1))	0	0				0	0.1296	38.1	0.00185858	2	901.524	0.0178365	40.3927	0
	High	VVDLLAPYAk	1	1	1	P06576	C-Term(Label:18O(1))	0	5.24292e+06	2.33968	1		0	0.1221	23.86	0.0421428	2	1090.64	1.69036	65.997	0
P10809	60 kDa heat shock protein, mitochondrial OS=Homo sapiens GN=HSPD1 PE=1 SV=2 - [CH60_HUMAN]	42.3	1.57	1	1	1	2	3.71649e+06				573	61.0164	5.87158
	A2	Sequence	# PSMs	# Proteins	# Protein Groups	Protein Group Accessions	Modifications	ΔCn	Area	(Medium+Heavy)/Light	(Medium+Heavy)/Light Count	(Medium+Heavy)/Light Variability [%]	q-Value	PEP	IonScore	Exp Value	Charge	MH+ [Da]	ΔM [ppm]	RT [min]	# Missed Cleavages
	High	VTDALNATR	1	1	1	P10809		0	0				0	0.03524	41.91	0.00103067	2	960.511	0.106846	36.1047	0
	Medium	VTDALNATr	1	1	1	P10809	C-Term(Label:18O(1))	0	3.71649e+06				0.042	0.3909	19.89	0.196925	2	962.52	5.01683	35.5044	0
P61764	Syntaxin-binding protein 1 OS=Homo sapiens GN=STXBP1 PE=1 SV=1 - [STXB1_HUMAN]	40.76	3.54	1	2	2	2	4.31902e+06	1.63564	1		594	67.5259	6.96143
	A2	Sequence	# PSMs	# Proteins	# Protein Groups	Protein Group Accessions	Modifications	ΔCn	Area	(Medium+Heavy)/Light	(Medium+Heavy)/Light Count	(Medium+Heavy)/Light Variability [%]	q-Value	PEP	IonScore	Exp Value	Charge	MH+ [Da]	ΔM [ppm]	RT [min]	# Missed Cleavages
	High	SQLLILDr	1	1	1	P61764	C-Term(Label:18O(1))	0	8.01932e+06	1.63564	1		0	0.1567	32.48	0.0045195	2	959.578	0.791064	62.1195	0
	High	SSASFSTTAVSAR	1	1	1	P61764		0	618721				0	0.06286	24.28	0.0481493	2	1271.63	2.1567	42.6166	0
P02686	Myelin basic protein OS=Homo sapiens GN=MBP PE=1 SV=3 - [MBP_HUMAN]	34.8	3.29	1	1	1	1	10942856				304	33.0973	9.78857
	A2	Sequence	# PSMs	# Proteins	# Protein Groups	Protein Group Accessions	Modifications	ΔCn	Area	(Medium+Heavy)/Light	(Medium+Heavy)/Light Count	(Medium+Heavy)/Light Variability [%]	q-Value	PEP	IonScore	Exp Value	Charge	MH+ [Da]	ΔM [ppm]	RT [min]	# Missed Cleavages
	High	GVDAQGTLSk	1	1	1	P02686	C-Term(Label:18O(1))	0	10942856				0	0.0688	34.8	0.00485107	2	977.515	-0.217182	32.3725	0
P19367	Hexokinase-1 OS=Homo sapiens GN=HK1 PE=1 SV=3 - [HXK1_HUMAN]	33.2	0.87	1	1	1	1					917	102.42	6.80029
	A2	Sequence	# PSMs	# Proteins	# Protein Groups	Protein Group Accessions	Modifications	ΔCn	Area	(Medium+Heavy)/Light	(Medium+Heavy)/Light Count	(Medium+Heavy)/Light Variability [%]	q-Value	PEP	IonScore	Exp Value	Charge	MH+ [Da]	ΔM [ppm]	RT [min]	# Missed Cleavages
	High	LVPDSDVr	1	1	1	P19367	C-Term(Label:18O(1))	0	0				0	0.2749	33.2	0.00713159	2	902.482	-1.12934	36.9978	0
P11488	Guanine nucleotide-binding protein G(t) subunit alpha-1 OS=Homo sapiens GN=GNAT1 PE=1 SV=5 - [GNAT1_HUMAN]	32.59	3.14	12	1	1	1	15486660				350	40.015	5.61768
	A2	Sequence	# PSMs	# Proteins	# Protein Groups	Protein Group Accessions	Modifications	ΔCn	Area	(Medium+Heavy)/Light	(Medium+Heavy)/Light Count	(Medium+Heavy)/Light Variability [%]	q-Value	PEP	IonScore	Exp Value	Charge	MH+ [Da]	ΔM [ppm]	RT [min]	# Missed Cleavages
	High	LLLLGAGESGk	1	12	1	P11488	C-Term(Label:18O(1))	0	15486660				0	0.0524	32.59	0.00366287	2	1059.63	0.63914	60.86	0
P04406	Glyceraldehyde-3-phosphate dehydrogenase OS=Homo sapiens GN=GAPDH PE=1 SV=3 - [G3P_HUMAN]	32.41	6.57	2	2	2	2	2.68964e+07	2.08309	1		335	36.0304	8.45557
	A2	Sequence	# PSMs	# Proteins	# Protein Groups	Protein Group Accessions	Modifications	ΔCn	Area	(Medium+Heavy)/Light	(Medium+Heavy)/Light Count	(Medium+Heavy)/Light Variability [%]	q-Value	PEP	IonScore	Exp Value	Charge	MH+ [Da]	ΔM [ppm]	RT [min]	# Missed Cleavages
	High	LTGmAFr	1	2	1	P04406	M4(Oxidation); C-Term(Label:18O(1))	0	4.35836e+06				0	0.29	25.68	0.0355571	2	813.417	-0.0459026	38.6979	0
	High	GALQNIIPASTGAAk	1	1	1	P04406	C-Term(Label:18O(1))	0	4.94345e+07	2.08309	1		0	0.03795	24.23	0.0313385	2	1413.8	0.465686	59.6171	0
Q15836	Vesicle-associated membrane protein 3 OS=Homo sapiens GN=VAMP3 PE=1 SV=3 - [VAMP3_HUMAN]	32.3	7	3	1	1	1	562231				100	11.302	8.79248
	A2	Sequence	# PSMs	# Proteins	# Protein Groups	Protein Group Accessions	Modifications	ΔCn	Area	(Medium+Heavy)/Light	(Medium+Heavy)/Light Count	(Medium+Heavy)/Light Variability [%]	q-Value	PEP	IonScore	Exp Value	Charge	MH+ [Da]	ΔM [ppm]	RT [min]	# Missed Cleavages
	High	LSELDDr	1	3	1	Q15836	C-Term(Label:18O(1))	0	562231				0	0.136	32.3	0.00556457	2	849.419	-1.04117	36.3946	0
P27348	14-3-3 protein theta OS=Homo sapiens GN=YWHAQ PE=1 SV=1 - [1433T_HUMAN]	31.25	3.27	7	1	1	1	2.27614e+07	1.36173	1		245	27.7468	4.77979
	A2	Sequence	# PSMs	# Proteins	# Protein Groups	Protein Group Accessions	Modifications	ΔCn	Area	(Medium+Heavy)/Light	(Medium+Heavy)/Light Count	(Medium+Heavy)/Light Variability [%]	q-Value	PEP	IonScore	Exp Value	Charge	MH+ [Da]	ΔM [ppm]	RT [min]	# Missed Cleavages
	High	NLLSVAYk	1	7	1	P27348	C-Term(Label:18O(1))	0	2.27614e+07	1.36173	1		0	0.1229	31.25	0.00742395	2	909.529	0.158399	58.6885	0
P04075	Fructose-bisphosphate aldolase A OS=Homo sapiens GN=ALDOA PE=1 SV=2 - [ALDOA_HUMAN]	30.01	2.47	1	1	1	1	1.68833e+06	2.12115	1		364	39.3953	8.08936
	A2	Sequence	# PSMs	# Proteins	# Protein Groups	Protein Group Accessions	Modifications	ΔCn	Area	(Medium+Heavy)/Light	(Medium+Heavy)/Light Count	(Medium+Heavy)/Light Variability [%]	q-Value	PEP	IonScore	Exp Value	Charge	MH+ [Da]	ΔM [ppm]	RT [min]	# Missed Cleavages
	High	QLLLTADDr	1	1	1	P04075	C-Term(Label:18O(1))	0	1.68833e+06	2.12115	1		0	0.1774	30.01	0.01736	2	1046.57	1.38259	65.0645	0
P07339	Cathepsin D OS=Homo sapiens GN=CTSD PE=1 SV=1 - [CATD_HUMAN]	29.58	1.94	1	1	1	1					412	44.5236	6.53662
	A2	Sequence	# PSMs	# Proteins	# Protein Groups	Protein Group Accessions	Modifications	ΔCn	Area	(Medium+Heavy)/Light	(Medium+Heavy)/Light Count	(Medium+Heavy)/Light Variability [%]	q-Value	PEP	IonScore	Exp Value	Charge	MH+ [Da]	ΔM [ppm]	RT [min]	# Missed Cleavages
	High	VGFAEAAR	1	1	1	P07339		0	0				0	0.1464	29.58	0.0252803	2	820.431	-0.856555	40.6819	0
P21796	Voltage-dependent anion-selective channel protein 1 OS=Homo sapiens GN=VDAC1 PE=1 SV=2 - [VDAC1_HUMAN]	28.66	4.59	1	1	1	1	3.16537e+06				283	30.7536	8.54346
	A2	Sequence	# PSMs	# Proteins	# Protein Groups	Protein Group Accessions	Modifications	ΔCn	Area	(Medium+Heavy)/Light	(Medium+Heavy)/Light Count	(Medium+Heavy)/Light Variability [%]	q-Value	PEP	IonScore	Exp Value	Charge	MH+ [Da]	ΔM [ppm]	RT [min]	# Missed Cleavages
	Medium	LTFDSSFSPNTGk	1	1	1	P21796	C-Term(Label:18O(1))	0	3.16537e+06				0.014	0.3403	28.66	0.0157928	2	1402.67	1.02451	58.5341	0
Q16555	Dihydropyrimidinase-related protein 2 OS=Homo sapiens GN=DPYSL2 PE=1 SV=1 - [DPYL2_HUMAN]	28.66	3.15	1	2	2	2	477325				572	62.2546	6.37939
	A2	Sequence	# PSMs	# Proteins	# Protein Groups	Protein Group Accessions	Modifications	ΔCn	Area	(Medium+Heavy)/Light	(Medium+Heavy)/Light Count	(Medium+Heavy)/Light Variability [%]	q-Value	PEP	IonScore	Exp Value	Charge	MH+ [Da]	ΔM [ppm]	RT [min]	# Missed Cleavages
	High	QQAPPVR	1	1	1	Q16555		0	0				0	0.2388	22.67	0.0848984	2	795.448	0.524358	25.3947	0
	High	GSPLVVISQGK	1	1	1	Q16555		0	477325				0	0.1762	19.99	0.0691591	2	1084.64	-0.43663	54.2984	0
P09936	Ubiquitin carboxyl-terminal hydrolase isozyme L1 OS=Homo sapiens GN=UCHL1 PE=1 SV=2 - [UCHL1_HUMAN]	27.61	4.48	1	1	1	1	1.19013e+07	4.30097	1		223	24.8085	5.47803
	A2	Sequence	# PSMs	# Proteins	# Protein Groups	Protein Group Accessions	Modifications	ΔCn	Area	(Medium+Heavy)/Light	(Medium+Heavy)/Light Count	(Medium+Heavy)/Light Variability [%]	q-Value	PEP	IonScore	Exp Value	Charge	MH+ [Da]	ΔM [ppm]	RT [min]	# Missed Cleavages
	High	LGFEDGSVLk	1	1	1	P09936	C-Term(Label:18O(1))	0	1.19013e+07	4.30097	1		0	0.1153	27.61	0.0309484	2	1066.57	1.27642	60.1976	0
P32119	Peroxiredoxin-2 OS=Homo sapiens GN=PRDX2 PE=1 SV=5 - [PRDX2_HUMAN]	26.28	5.05	1	1	1	1					198	21.8782	5.97314
	A2	Sequence	# PSMs	# Proteins	# Protein Groups	Protein Group Accessions	Modifications	ΔCn	Area	(Medium+Heavy)/Light	(Medium+Heavy)/Light Count	(Medium+Heavy)/Light Variability [%]	q-Value	PEP	IonScore	Exp Value	Charge	MH+ [Da]	ΔM [ppm]	RT [min]	# Missed Cleavages
	Medium	ATAVVDGAFk	1	1	1	P32119	C-Term(Label:18O(1))	0	0				0.031	0.3797	26.28	0.0377985	2	980.531	0.865768	46.1464	0
P61106	Ras-related protein Rab-14 OS=Homo sapiens GN=RAB14 PE=1 SV=4 - [RAB14_HUMAN]	24.38	4.19	1	1	1	2	225531	0.687039	1		215	23.8819	6.21436
	A2	Sequence	# PSMs	# Proteins	# Protein Groups	Protein Group Accessions	Modifications	ΔCn	Area	(Medium+Heavy)/Light	(Medium+Heavy)/Light Count	(Medium+Heavy)/Light Variability [%]	q-Value	PEP	IonScore	Exp Value	Charge	MH+ [Da]	ΔM [ppm]	RT [min]	# Missed Cleavages
	High	LTSEPQPQR	2	1	1	P61106		0	225531	0.687039	1		0	0.3002	18.97	0.150851	2	1055.55	5.41634	29.487	0
P38606	V-type proton ATPase catalytic subunit A OS=Homo sapiens GN=ATP6V1A PE=1 SV=2 - [VATA_HUMAN]	23.48	1.46	1	1	1	1					617	68.2605	5.51611
	A2	Sequence	# PSMs	# Proteins	# Protein Groups	Protein Group Accessions	Modifications	ΔCn	Area	(Medium+Heavy)/Light	(Medium+Heavy)/Light Count	(Medium+Heavy)/Light Variability [%]	q-Value	PEP	IonScore	Exp Value	Charge	MH+ [Da]	ΔM [ppm]	RT [min]	# Missed Cleavages
	High	GVNVSALSR	1	1	1	P38606		0	0				0	0.2235	23.48	0.0726968	2	902.506	0.302013	45.0057	0
P00505	Aspartate aminotransferase, mitochondrial OS=Homo sapiens GN=GOT2 PE=1 SV=3 - [AATM_HUMAN]	22.89	3.26	1	1	1	1	6.02854e+06	2.33283	1		430	47.4873	9.01221
	A2	Sequence	# PSMs	# Proteins	# Protein Groups	Protein Group Accessions	Modifications	ΔCn	Area	(Medium+Heavy)/Light	(Medium+Heavy)/Light Count	(Medium+Heavy)/Light Variability [%]	q-Value	PEP	IonScore	Exp Value	Charge	MH+ [Da]	ΔM [ppm]	RT [min]	# Missed Cleavages
	High	FVTVQTISGTGALr	1	1	1	P00505	C-Term(Label:18O(1))	0	6.02854e+06	2.33283	1		0	0.1449	22.89	0.0298145	2	1451.81	1.36805	62.2083	0
P60174	Triosephosphate isomerase OS=Homo sapiens GN=TPI1 PE=1 SV=3 - [TPIS_HUMAN]	21.77	4.2	1	1	1	2	702135				286	30.7717	5.92236
	A2	Sequence	# PSMs	# Proteins	# Protein Groups	Protein Group Accessions	Modifications	ΔCn	Area	(Medium+Heavy)/Light	(Medium+Heavy)/Light Count	(Medium+Heavy)/Light Variability [%]	q-Value	PEP	IonScore	Exp Value	Charge	MH+ [Da]	ΔM [ppm]	RT [min]	# Missed Cleavages
	High	SNVSDAVAQSTr	2	1	1	P60174	C-Term(Label:18O(1))	0	702135				0	0.183	19	0.135334	2	1236.61	-1.00686	37.6936	0
P18085	ADP-ribosylation factor 4 OS=Homo sapiens GN=ARF4 PE=1 SV=3 - [ARF4_HUMAN]	20.17	6.11	4	1	1	1	1.39574e+06	1.13074	1		180	20.4977	7.13721
	A2	Sequence	# PSMs	# Proteins	# Protein Groups	Protein Group Accessions	Modifications	ΔCn	Area	(Medium+Heavy)/Light	(Medium+Heavy)/Light Count	(Medium+Heavy)/Light Variability [%]	q-Value	PEP	IonScore	Exp Value	Charge	MH+ [Da]	ΔM [ppm]	RT [min]	# Missed Cleavages
	High	ILmVGLDAAGk	1	4	1	P18085	M3(Oxidation); C-Term(Label:18O(1))	0	1.39574e+06	1.13074	1		0	0.2459	20.17	0.126452	2	1105.62	2.21071	55.5981	0
O95716	Ras-related protein Rab-3D OS=Homo sapiens GN=RAB3D PE=1 SV=1 - [RAB3D_HUMAN]	19.74	2.74	4	1	1	1	2.06475e+06				219	24.2518	4.93213
	A2	Sequence	# PSMs	# Proteins	# Protein Groups	Protein Group Accessions	Modifications	ΔCn	Area	(Medium+Heavy)/Light	(Medium+Heavy)/Light Count	(Medium+Heavy)/Light Variability [%]	q-Value	PEP	IonScore	Exp Value	Charge	MH+ [Da]	ΔM [ppm]	RT [min]	# Missed Cleavages
	High	TSFLFr	1	4	1	O95716	C-Term(Label:18O(1))	0	2.06475e+06				0	0.2718	19.74	0.129527	2	772.424	0.457779	62.121	0
P14618	Pyruvate kinase isozymes M1/M2 OS=Homo sapiens GN=PKM PE=1 SV=4 - [KPYM_HUMAN]	18.76	1.69	1	1	1	1					531	57.9	7.84033
	A2	Sequence	# PSMs	# Proteins	# Protein Groups	Protein Group Accessions	Modifications	ΔCn	Area	(Medium+Heavy)/Light	(Medium+Heavy)/Light Count	(Medium+Heavy)/Light Variability [%]	q-Value	PEP	IonScore	Exp Value	Charge	MH+ [Da]	ΔM [ppm]	RT [min]	# Missed Cleavages
	High	VNFAmNVGk	1	1	1	P14618	M5(Oxidation); C-Term(Label:18O(1))	0	0				0	0.289	18.76	0.168968	2	997.501	-0.8551	43.2478	0
P21281	V-type proton ATPase subunit B, brain isoform OS=Homo sapiens GN=ATP6V1B2 PE=1 SV=3 - [VATB2_HUMAN]	18.03	2.15	1	1	1	1	820248	1.28847	1		511	56.4649	5.80811
	A2	Sequence	# PSMs	# Proteins	# Protein Groups	Protein Group Accessions	Modifications	ΔCn	Area	(Medium+Heavy)/Light	(Medium+Heavy)/Light Count	(Medium+Heavy)/Light Variability [%]	q-Value	PEP	IonScore	Exp Value	Charge	MH+ [Da]	ΔM [ppm]	RT [min]	# Missed Cleavages
	Medium	SGQVLEVSGSK	1	1	1	P21281		0	820248	1.28847	1		0.042	0.391	18.03	0.306927	2	1090.57	-0.588235	38.3084	0
P25705	ATP synthase subunit alpha, mitochondrial OS=Homo sapiens GN=ATP5A1 PE=1 SV=1 - [ATPA_HUMAN]	18.01	6.51	1	4	4	4	4.48708e+06	0.784133	1		553	59.7136	9.12939
	A2	Sequence	# PSMs	# Proteins	# Protein Groups	Protein Group Accessions	Modifications	ΔCn	Area	(Medium+Heavy)/Light	(Medium+Heavy)/Light Count	(Medium+Heavy)/Light Variability [%]	q-Value	PEP	IonScore	Exp Value	Charge	MH+ [Da]	ΔM [ppm]	RT [min]	# Missed Cleavages
	High	APGIIPR	1	1	1	P25705		0	2887549	0.784133	1		0	0.2968	17.43	0.0704798	2	723.451	-0.691281	44.9808	0
	High	VVDALGNAIDGk	1	1	1	P25705	C-Term(Label:18O(1))	0	6.08662e+06				0	0.3155	14.08	0.574536	2	1173.64	0.196626	52.9843	0
	High	QmSLLLr	1	1	1	P25705	M2(Oxidation); C-Term(Label:18O(1))	0	0				0	0.3323	11.87	0.962192	2	878.504	2.51151	52.2685	0
	Medium	AVDSLVPIGR	1	1	1	P25705		0	0				0.031	0.377	10.18	0.700362	2	1026.6	3.09606	57.5225	0
P17600	Synapsin-1 OS=Homo sapiens GN=SYN1 PE=1 SV=3 - [SYN1_HUMAN]	17.95	1.42	1	1	1	1					705	74.0656	9.83252
	A2	Sequence	# PSMs	# Proteins	# Protein Groups	Protein Group Accessions	Modifications	ΔCn	Area	(Medium+Heavy)/Light	(Medium+Heavy)/Light Count	(Medium+Heavy)/Light Variability [%]	q-Value	PEP	IonScore	Exp Value	Charge	MH+ [Da]	ΔM [ppm]	RT [min]	# Missed Cleavages
	Medium	QASQAGPVPR	1	1	1	P17600		0	0				0.031	0.3841	17.95	0.230867	2	1010.54	0.610973	29.8483	0
P12277	Creatine kinase B-type OS=Homo sapiens GN=CKB PE=1 SV=1 - [KCRB_HUMAN]	17.39	2.62	1	1	1	1	2.90558e+06	3.22113	1		381	42.6173	5.59229
	A2	Sequence	# PSMs	# Proteins	# Protein Groups	Protein Group Accessions	Modifications	ΔCn	Area	(Medium+Heavy)/Light	(Medium+Heavy)/Light Count	(Medium+Heavy)/Light Variability [%]	q-Value	PEP	IonScore	Exp Value	Charge	MH+ [Da]	ΔM [ppm]	RT [min]	# Missed Cleavages
	High	DLFDPIIEDr	1	1	1	P12277	C-Term(Label:18O(1))	0	2.90558e+06	3.22113	1		0	0.2967	17.39	0.284528	2	1234.62	-0.110685	72.1562	0
O43759	Synaptogyrin-1 OS=Homo sapiens GN=SYNGR1 PE=1 SV=2 - [SNG1_HUMAN]	17.33	5.15	1	1	1	1	1.21693e+06	5.38937	1		233	25.4393	4.67822
	A2	Sequence	# PSMs	# Proteins	# Protein Groups	Protein Group Accessions	Modifications	ΔCn	Area	(Medium+Heavy)/Light	(Medium+Heavy)/Light Count	(Medium+Heavy)/Light Variability [%]	q-Value	PEP	IonScore	Exp Value	Charge	MH+ [Da]	ΔM [ppm]	RT [min]	# Missed Cleavages
	High	DNPLNEGTDAAr	1	1	1	O43759	C-Term(Label:18O(1))	0	1.21693e+06	5.38937	1		0	0.3124	17.33	0.121127	2	1274.59	-0.0442041	39.2053	0
P07900	Heat shock protein HSP 90-alpha OS=Homo sapiens GN=HSP90AA1 PE=1 SV=5 - [HS90A_HUMAN]	16.74	1.5	1	1	1	1	3246242	4.18565	1		732	84.6067	5.021
	A2	Sequence	# PSMs	# Proteins	# Protein Groups	Protein Group Accessions	Modifications	ΔCn	Area	(Medium+Heavy)/Light	(Medium+Heavy)/Light Count	(Medium+Heavy)/Light Variability [%]	q-Value	PEP	IonScore	Exp Value	Charge	MH+ [Da]	ΔM [ppm]	RT [min]	# Missed Cleavages
	High	DQVANSAFVEr	1	1	1	P07900	C-Term(Label:18O(1))	0	3246242	4.18565	1		0	0.2742	16.74	0.273269	2	1237.61	1.64704	44.3153	0
P68104	Elongation factor 1-alpha 1 OS=Homo sapiens GN=EEF1A1 PE=1 SV=1 - [EF1A1_HUMAN]	15.71	2.38	3	1	1	1					462	50.1091	9.01221
	A2	Sequence	# PSMs	# Proteins	# Protein Groups	Protein Group Accessions	Modifications	ΔCn	Area	(Medium+Heavy)/Light	(Medium+Heavy)/Light Count	(Medium+Heavy)/Light Variability [%]	q-Value	PEP	IonScore	Exp Value	Charge	MH+ [Da]	ΔM [ppm]	RT [min]	# Missed Cleavages
	Medium	IGGIGTVPVGR	1	3	1	P68104		0	0				0.027	0.3629	15.71	0.15575	2	1025.61	1.79097	52.5056	0
Q8N111	Cell cycle exit and neuronal differentiation protein 1 OS=Homo sapiens GN=CEND1 PE=2 SV=1 - [CEND_HUMAN]	13.41	6.04	1	1	1	1	5.66616e+06	2.60744	1		149	14.9448	9.20264
	A2	Sequence	# PSMs	# Proteins	# Protein Groups	Protein Group Accessions	Modifications	ΔCn	Area	(Medium+Heavy)/Light	(Medium+Heavy)/Light Count	(Medium+Heavy)/Light Variability [%]	q-Value	PEP	IonScore	Exp Value	Charge	MH+ [Da]	ΔM [ppm]	RT [min]	# Missed Cleavages
	High	VPQVTTEAk	1	1	1	Q8N111	C-Term(Label:18O(1))	0	5.66616e+06	2.60744	1		0	0.169	13.41	0.624771	2	974.542	1.81985	33.5885	0
P11142	Heat shock cognate 71 kDa protein OS=Homo sapiens GN=HSPA8 PE=1 SV=1 - [HSP7C_HUMAN]	0	1.08	1	1	1	1	1.26954e+06				646	70.8542	5.51611
	A2	Sequence	# PSMs	# Proteins	# Protein Groups	Protein Group Accessions	Modifications	ΔCn	Area	(Medium+Heavy)/Light	(Medium+Heavy)/Light Count	(Medium+Heavy)/Light Variability [%]	q-Value	PEP	IonScore	Exp Value	Charge	MH+ [Da]	ΔM [ppm]	RT [min]	# Missed Cleavages
	Medium	ITITNDk	1	1	1	P11142	C-Term(Label:18O(1))	0	1.26954e+06				0.014	0.3532	18.6	0.424468	2	806.453	2.55925	33.0659	0
P40925	Malate dehydrogenase, cytoplasmic OS=Homo sapiens GN=MDH1 PE=1 SV=4 - [MDHC_HUMAN]	0	2.69	1	1	1	1					334	36.403	7.35693
	A2	Sequence	# PSMs	# Proteins	# Protein Groups	Protein Group Accessions	Modifications	ΔCn	Area	(Medium+Heavy)/Light	(Medium+Heavy)/Light Count	(Medium+Heavy)/Light Variability [%]	q-Value	PEP	IonScore	Exp Value	Charge	MH+ [Da]	ΔM [ppm]	RT [min]	# Missed Cleavages
	High	LGVTANDVk	1	1	1	P40925	C-Term(Label:18O(1))	0	0				0	0.236	21.82	0.112131	2	918.513	-1.23052	39.2712	0
P13637	Sodium/potassium-transporting ATPase subunit alpha-3 OS=Homo sapiens GN=ATP1A3 PE=1 SV=3 - [AT1A3_HUMAN]	0	1.88	3	1	1	2	4.1919e+06				1013	111.677	5.37646
	A2	Sequence	# PSMs	# Proteins	# Protein Groups	Protein Group Accessions	Modifications	ΔCn	Area	(Medium+Heavy)/Light	(Medium+Heavy)/Light Count	(Medium+Heavy)/Light Variability [%]	q-Value	PEP	IonScore	Exp Value	Charge	MH+ [Da]	ΔM [ppm]	RT [min]	# Missed Cleavages
	High	QGAIVAVTGDGVNDSPALk	2	3	1	P13637	C-Term(Label:18O(1))	0	4.1919e+06				0	0.1812	15.06	0.276022	2	1813.95	-0.924568	57.569	0
Q00577	Transcriptional activator protein Pur-alpha OS=Homo sapiens GN=PURA PE=1 SV=2 - [PURA_HUMAN]	0	3.11	1	1	1	3					322	34.8894	6.44287
	A2	Sequence	# PSMs	# Proteins	# Protein Groups	Protein Group Accessions	Modifications	ΔCn	Area	(Medium+Heavy)/Light	(Medium+Heavy)/Light Count	(Medium+Heavy)/Light Variability [%]	q-Value	PEP	IonScore	Exp Value	Charge	MH+ [Da]	ΔM [ppm]	RT [min]	# Missed Cleavages
	High	IAEVGAGGNK	3	1	1	Q00577		0	0				0	0.1703	21.77	0.0911424	2	915.486	-3.59228	27.759	0
P10636	Microtubule-associated protein tau OS=Homo sapiens GN=MAPT PE=1 SV=5 - [TAU_HUMAN]	0	2.77	1	2	2	2	4.80888e+06	2.98554	1		758	78.8798	6.7124
	A2	Sequence	# PSMs	# Proteins	# Protein Groups	Protein Group Accessions	Modifications	ΔCn	Area	(Medium+Heavy)/Light	(Medium+Heavy)/Light Count	(Medium+Heavy)/Light Variability [%]	q-Value	PEP	IonScore	Exp Value	Charge	MH+ [Da]	ΔM [ppm]	RT [min]	# Missed Cleavages
	High	SPVVSGDTSPr	1	1	1	P10636	C-Term(Label:18O(1))	0	4.80888e+06	2.98554	1		0	0.09887	10.51	1.04037	2	1103.56	0.22989	32.2982	0
	Medium	TPPSSGEPPK	1	1	1	P10636		0	0				0.031	0.3706	11.38	0.909725	2	996.5	0.0412674	25.4107	0
Q16143	Beta-synuclein OS=Homo sapiens GN=SNCB PE=1 SV=1 - [SYUB_HUMAN]	0	16.42	1	2	2	2	2.94563e+06	2.85828	1		134	14.279	4.41162
	A2	Sequence	# PSMs	# Proteins	# Protein Groups	Protein Group Accessions	Modifications	ΔCn	Area	(Medium+Heavy)/Light	(Medium+Heavy)/Light Count	(Medium+Heavy)/Light Variability [%]	q-Value	PEP	IonScore	Exp Value	Charge	MH+ [Da]	ΔM [ppm]	RT [min]	# Missed Cleavages
	High	EGVVAAAEk	1	1	1	Q16143	C-Term(Label:18O(1))	0	2.94563e+06	2.85828	1		0	0.1334	11.17	1.3749	2	875.472	0.0504035	32.2648	0
	High	EGVVQGVASVAEk	1	1	1	Q16143	C-Term(Label:18O(1))	0	0				0	0.2896	10.54	1.22307	2	1274.68	-0.354725	53.1067	0
B2RXH8	Heterogeneous nuclear ribonucleoprotein C-like 2 OS=Homo sapiens GN=HNRNPCL2 PE=2 SV=1 - [HNRC2_HUMAN]	0	3.07	3	1	1	1					293	32.0528	5.43994
	A2	Sequence	# PSMs	# Proteins	# Protein Groups	Protein Group Accessions	Modifications	ΔCn	Area	(Medium+Heavy)/Light	(Medium+Heavy)/Light Count	(Medium+Heavy)/Light Variability [%]	q-Value	PEP	IonScore	Exp Value	Charge	MH+ [Da]	ΔM [ppm]	RT [min]	# Missed Cleavages
	Medium	AAVAGEDGR	1	3	1	B2RXH8		0	0				0.031	0.3819	13.05	0.381497	2	845.411	-0.709957	19.5734	0

## Sheet: AD4
Accession	Description	Score	Coverage	# Proteins	# Unique Peptides	# Peptides	# PSMs	Area	(Medium+Heavy)/Light	(Medium+Heavy)/Light Count	(Medium+Heavy)/Light Variability [%]	# AAs	MW [kDa]	calc. pI
P60709	Actin, cytoplasmic 1 OS=Homo sapiens GN=ACTB PE=1 SV=1 - [ACTB_HUMAN]	598.815	28	11	6	10	31	1.28991e+09	0.661224	4	29.9987	375	41.7097	5.47803
	A2	Sequence	# PSMs	# Proteins	# Protein Groups	Protein Group Accessions	Modifications	ΔCn	Area	(Medium+Heavy)/Light	(Medium+Heavy)/Light Count	(Medium+Heavy)/Light Variability [%]	q-Value	PEP	IonScore	Exp Value	Charge	MH+ [Da]	ΔM [ppm]	RT [min]	# Missed Cleavages
	High	SYELPDGQVITIGNER	3	10	2	P60709;Q562R1		0	57970606				0	4.565e-05	93.52	5.4912e-09	2	1790.89	-0.395529	68.5728	0
	High	AGFAGDDAPR	6	10	1	P60709		0	1950074816	0.59858	1		0	0.00147	67.53	1.03313e-06	2	976.449	0.562075	34.8013	0
	High	DSYVGDEAQSKR	3	6	1	P60709		0	64507818	0.492615	2	63.7507	0	0.0003023	55	2.6405e-05	2	1354.62	0.133952	30.5604	1
	High	DSYVGDEAQSK	2	6	1	P60709		0	318368776	0.889404	1		0	0.001175	47.85	5.82409e-05	2	1198.52	0.0877463	30.1382	0
	High	VAPEEHPVLLTEAPLNPK	6	2	1	P60709		0	1.6431e+07				0	6.645e-05	45.86	0.00017381	3	1954.07	0.305174	64.9536	0
	High	EITALAPSTmK	2	6	1	P60709	M10(Oxidation)	0	1601294656				0	0.001099	44.15	0.000726878	2	1177.61	0.901128	43.3112	0
	High	HQGVmVGmGQK	3	7	2	P60709;Q562R1	M5(Oxidation); M8(Oxidation)	0	97451070				0	0.005028	29.28	0.0108589	3	1203.56	-0.341312	27.033	0
	High	AVFPSIVGRPR	4	9	1	P60709		0	0				0	0.00649	19.39	0.0581154	3	1198.71	0.711795	62.2724	0
	High	DLTDYLmk	1	7	2	P60709;Q562R1	M7(Oxidation); C-Term(Label:18O(1))	0	51356878				0.003	0.05184	24.95	0.0265508	2	1016.49	1.02956	57.1465	0
	Medium	IIAPPERK	1	7	2	P60709;Q562R1		0	1.55068e+07				0.018	0.09035	28.41	0.00519162	2	923.567	-0.817895	34.1082	1
P25705	ATP synthase subunit alpha, mitochondrial OS=Homo sapiens GN=ATP5A1 PE=1 SV=1 - [ATPA_HUMAN]	498.243	23.69	1	13	13	21	122990594	0.360927	9	65.6777	553	59.7136	9.12939
	A2	Sequence	# PSMs	# Proteins	# Protein Groups	Protein Group Accessions	Modifications	ΔCn	Area	(Medium+Heavy)/Light	(Medium+Heavy)/Light Count	(Medium+Heavy)/Light Variability [%]	q-Value	PEP	IonScore	Exp Value	Charge	MH+ [Da]	ΔM [ppm]	RT [min]	# Missed Cleavages
	High	ILGADTSVDLEETGR	1	1	1	P25705		0	54913510				0	4.147e-07	105.08	4.0825e-10	2	1575.79	0.0248202	56.7086	0
	High	TGTAEmSSILEER	2	1	1	P25705	M6(Oxidation)	0	5549465	3.32673	2	17.1212	0	0.0001454	86.64	1.58242e-08	2	1439.67	0.717402	44.9002	0
	High	AVDSLVPIGR	3	1	1	P25705		0	143264512				0	0.02002	57.52	1.38954e-05	2	1026.6	0.717909	57.1127	0
	High	TGAIVDVPVGEELLGR	1	1	1	P25705		0	1.30882e+07				0	0.000256	54.39	2.49282e-05	2	1624.89	0.744623	74.5122	0
	High	APGIIPR	2	1	1	P25705		0	108376418	0.344698	1		0	0.01444	38.19	0.00059165	2	723.451	-0.18508	43.2958	0
	High	TSIAIDTIINQK	1	1	1	P25705		0	2.21283e+07				0	0.002748	31.87	0.00562362	2	1316.74	1.24447	63.6563	0
	High	EPmQTGIK	1	1	1	P25705	M3(Oxidation)	0	57513152	0.360927	1		0	0.01901	29.81	0.0144171	2	919.457	1.29888	23.8278	0
	High	VLSIGDGIAR	3	1	1	P25705		0	117330852	0.240991	1		0	0.006243	27.77	0.0152905	2	1000.58	0.456562	54.8064	0
	High	VGSAAQTR	1	1	1	P25705		0	2.90903e+07	0.293975	1		0.003	0.04625	53.93	7.18122e-05	2	789.421	-0.319422	15.5378	0
	High	VVDALGNAIDGk	1	1	1	P25705	C-Term(Label:18O(1))	0	23822382	1.786	1		0.003	0.03691	21.34	0.0932833	2	1173.64	0.612667	51.5572	0
	Medium	EGDIVKR	1	1	1	P25705		0	13280982	0.31651	1		0.022	0.107	42.92	0.000752995	2	816.458	0.826921	25.7578	1
	Medium	LTELLK	1	1	1	P25705		0	8.7962e+06				0.025	0.1275	29.7	0.00953652	2	716.456	0.862413	45.7396	0
	Medium	QmSLLLR	3	1	1	P25705	M2(Oxidation)	0	1.09195e+07	0.555791	1		0.032	0.1798	36.19	0.00301748	2	876.498	0.815824	49.2486	0
Q16555	Dihydropyrimidinase-related protein 2 OS=Homo sapiens GN=DPYSL2 PE=1 SV=1 - [DPYL2_HUMAN]	386.215	17.48	1	7	10	24	2.48003e+08	0.613079	2	262.191	572	62.2546	6.37939
	A2	Sequence	# PSMs	# Proteins	# Protein Groups	Protein Group Accessions	Modifications	ΔCn	Area	(Medium+Heavy)/Light	(Medium+Heavy)/Light Count	(Medium+Heavy)/Light Variability [%]	q-Value	PEP	IonScore	Exp Value	Charge	MH+ [Da]	ΔM [ppm]	RT [min]	# Missed Cleavages
	High	mDENQFVAVTSTNAAK	2	3	3	Q16555;Q14194;Q14195	M1(Oxidation)	0	82332150				0	1.216e-06	105.3	2.13963e-10	2	1741.81	-0.435628	48.8801	0
	High	QIGENLIVPGGVK	1	2	2	Q16555;Q14194		0	82815422				0	0.0003556	53.67	2.49131e-05	2	1323.76	0.890283	61.0633	0
	High	GSPLVVISQGK	2	1	1	Q16555		0	1.11523e+08				0	0.000196	45.71	0.00017589	2	1084.64	0.68882	53.3778	0
	High	SSAEVIAQAR	3	1	1	Q16555		0	245044052				0	0.002499	38.96	0.00178516	2	1031.55	0.562536	35.5565	0
	High	TIEAHSR	4	1	1	Q16555		0	1.80906e+07	1.61553	1		0	0.01551	36.4	0.00392884	2	813.421	-0.0725981	19.1565	0
	High	TVTPASSAK	4	1	1	Q16555		0	96059478				0	0.01417	31.8	0.0129826	2	861.468	-0.168828	19.9134	0
	High	mVIPGGIDVHTR	4	1	1	Q16555	M1(Oxidation)	0	4.05997e+06				0	0.000156	19.03	0.161283	3	1310.69	0.485879	52.6339	0
	High	VFNLYPR	1	1	1	Q16555		0	56355823	0.232657	1		0.001	0.0345	51.47	0.000105146	2	908.499	0.0634739	58.5475	0
	Medium	QQAPPVR	1	1	1	Q16555		0	123023132				0.022	0.1106	27.98	0.0249977	2	795.447	-0.703332	24.5199	0
	Medium	IVAPPGGR	2	3	3	Q16555;Q14194;Q14195		0	375940704				0.027	0.1417	30.7	0.00749001	2	766.457	0.035943	31.6194	0
Q9BQE3	Tubulin alpha-1C chain OS=Homo sapiens GN=TUBA1C PE=1 SV=1 - [TBA1C_HUMAN]	371.334	20.71	6	3	9	16	4.06296e+08				449	49.8635	5.09717
	A2	Sequence	# PSMs	# Proteins	# Protein Groups	Protein Group Accessions	Modifications	ΔCn	Area	(Medium+Heavy)/Light	(Medium+Heavy)/Light Count	(Medium+Heavy)/Light Variability [%]	q-Value	PEP	IonScore	Exp Value	Charge	MH+ [Da]	ΔM [ppm]	RT [min]	# Missed Cleavages
	High	AVFVDLEPTVIDEVR	6	3	1	Q9BQE3		0	54321438				0	3.308e-06	79.38	1.06694e-07	2	1701.91	-0.179871	78.5356	0
	High	EDAANNYAR	1	7	3	Q9BQE3;P68366;Q9NY65		0	116737908				0	0.002622	69.71	4.65039e-07	2	1023.45	0.567942	25.1227	0
	High	TIGGGDDSFNTFFSETGAGK	1	5	1	Q9BQE3		0	1.25273e+07				0	0.001788	55.84	8.20938e-06	2	2007.89	-0.864728	71.6412	0
	High	DVNAAIATIK	2	5	1	Q9BQE3		0	1039277992				0	0.0037	44.26	0.000378723	2	1015.58	0.724504	51.5227	0
	High	EDMAALEK	1	4	2	Q9BQE3;P68366		0	1.88009e+07				0	0.01499	10.13	0.732735	2	906.425	1.05791	38.0643	0
	High	IHFPLATYAPVISAEK	2	6	2	Q9BQE3;P68366		0	0				0.002	0.03541	16.19	0.161092	3	1756.97	1.52264	82.7797	0
	High	LSVDYGKK	1	5	2	Q9BQE3;P68366		0	1.89149e+07				0.003	0.03607	28.92	0.0172473	2	909.504	0.239388	35.4501	1
	Medium	FDLmYAk	1	8	3	Q9BQE3;P68366;Q9NY65	M4(Oxidation); C-Term(Label:18O(1))	0	36960213				0.016	0.08143	23.27	0.0435654	2	905.433	1.22145	51.2467	0
	Medium	LSVDYGk	1	5	2	Q9BQE3;P68366	C-Term(Label:18O(2))	0	6.2871e+07				0.035	0.191	10.66	1.31859	2	785.418	0.267257	37.7434	0
P80723	Brain acid soluble protein 1 OS=Homo sapiens GN=BASP1 PE=1 SV=2 - [BASP1_HUMAN]	329.255	56.39	1	7	7	17	2.07676e+08	1.23494	4	91.7743	227	22.68	4.62744
	A2	Sequence	# PSMs	# Proteins	# Protein Groups	Protein Group Accessions	Modifications	ΔCn	Area	(Medium+Heavy)/Light	(Medium+Heavy)/Light Count	(Medium+Heavy)/Light Variability [%]	q-Value	PEP	IonScore	Exp Value	Charge	MH+ [Da]	ΔM [ppm]	RT [min]	# Missed Cleavages
	High	KTEAPAAPAAQETK	4	1	1	P80723		0	82538526				0	7.268e-05	67.61	2.25395e-06	2	1412.74	0.102976	29.1375	1
	High	AEGAATEEEGTPK	1	1	1	P80723		0	50451630				0	0.0001035	46.71	0.000109852	2	1289.59	0.266596	25.4616	0
	High	ETPAATEAPSSTPK	2	1	1	P80723		0	424547528				0	1.214e-05	45.55	0.000313439	2	1386.68	0.227254	31.2718	0
	High	AEPPKAPEQEQAAPGPAAGGEAPK	4	1	1	P80723		0	4.58061e+06	2.06375	1		0	7.602e-06	38.75	0.00130018	3	2298.14	-0.162708	38.7823	1
	High	ESEPQAAAEPAEAK	1	1	1	P80723		0	75358596	0.718983	1		0	0.000221	35.47	0.00255413	2	1427.66	-0.59622	31.1988	0
	High	SDGAPASDSKPGSSEAAPSSK	3	1	1	P80723		0	115941392	0.738977	1		0	5.053e-06	32.04	0.00350097	3	1932.88	0.245728	26.9723	0
	High	AAEAAAAPAESAAPAAGEEPSKEEGEPK	2	1	1	P80723		0	12813485	3.53255	1		0	2.98499e-07	30.37	0.00551	3	2636.23	-1.17558	40.334	1
P04350	Tubulin beta-4A chain OS=Homo sapiens GN=TUBB4A PE=1 SV=2 - [TBB4A_HUMAN]	322.779	20.5	2	4	9	15	2.62778e+08	1.28805	1		444	49.5539	4.88135
	A2	Sequence	# PSMs	# Proteins	# Protein Groups	Protein Group Accessions	Modifications	ΔCn	Area	(Medium+Heavy)/Light	(Medium+Heavy)/Light Count	(Medium+Heavy)/Light Variability [%]	q-Value	PEP	IonScore	Exp Value	Charge	MH+ [Da]	ΔM [ppm]	RT [min]	# Missed Cleavages
	High	LAVNmVPFPR	3	10	4	Q13885;P04350;P68371;P07437	M5(Oxidation)	0	206418136				0	0.001483	64.1	5.25211e-06	2	1159.63	2.12582	60.8274	0
	High	EVDEQmLSVQSK	2	1	1	P04350	M6(Oxidation)	0	166744744	1.28805	1		0	0.00199	55.58	2.73927e-05	2	1408.66	0.445271	38.3498	0
	High	ALTVPELTQQmFDAK	2	3	2	P04350;P68371	M11(Oxidation)	0	216356996				0	0.0001204	50.16	0.000147466	2	1707.86	-0.17579	65.2628	0
	High	INVYYNEATGGNYVPR	1	1	1	P04350		0	3.12384e+07				0	0.006759	43.18	0.000596241	2	1829.88	-1.18429	58.4137	0
	High	AVLVDLEPGTmDSVR	2	3	2	P04350;P68371	M11(Oxidation)	0	365558392				0	1.636e-05	38.22	0.00221471	2	1617.82	1.21277	60.7872	0
	High	FPGQLNADLr	1	10	4	Q13885;P04350;P68371;P07437	C-Term(Label:18O(1))	0	0				0	0.003222	33.99	0.00524718	2	1132.6	1.35486	56.9204	0
	High	mSmKEVDEQmLSVQSK	1	1	1	P04350	M1(Oxidation); M3(Oxidation); M10(Oxidation)	0	0				0	0.003013	17.46	0.0646104	3	1917.86	0.121239	39.0242	1
	High	IREEFPDR	1	2	1	P04350		0	0				0	0.01731	12.08	0.876509	3	1061.54	1.77102	43.7212	1
	High	KLAVNmVPFPR	1	10	4	Q13885;P04350;P68371;P07437	M6(Oxidation)	0	7.35286e+06				0.003	0.04362	16.38	0.226692	3	1287.73	1.62007	59.9558	1
	Medium	LAVNMVPFPR	1	10	4	Q13885;P04350;P68371;P07437		0	5.84527e+06				0.021	0.0933	23.72	0.0433112	2	1143.64	1.76528	68.7587	0
P17600	Synapsin-1 OS=Homo sapiens GN=SYN1 PE=1 SV=3 - [SYN1_HUMAN]	307.414	10.78	1	7	7	14	2.18581e+08	0.500301	4	44.0288	705	74.0656	9.83252
	A2	Sequence	# PSMs	# Proteins	# Protein Groups	Protein Group Accessions	Modifications	ΔCn	Area	(Medium+Heavy)/Light	(Medium+Heavy)/Light Count	(Medium+Heavy)/Light Variability [%]	q-Value	PEP	IonScore	Exp Value	Charge	MH+ [Da]	ΔM [ppm]	RT [min]	# Missed Cleavages
	High	QASQAGPVPR	3	1	1	P17600		0	203436918				0	0.001076	69.34	1.90335e-06	2	1010.54	-0.295007	28.2756	0
	High	QTSVSGPAPPK	2	1	1	P17600		0	215889996				0	0.004745	52.8	6.90122e-05	2	1068.57	0.415467	30.6237	0
	High	QAGPPQATR	2	1	1	P17600		0	236416912				0	0.0007153	49.41	0.000163236	2	925.485	0.0461223	23.269	0
	High	TYATAEPFIDAK	1	1	1	P17600		0	2.03546e+07	0.950863	1		0	0.0004127	45.54	0.000442618	2	1326.66	0.444292	56.353	0
	High	ASGAPPGGQQR	3	1	1	P17600		0	43403364	0.415147	1		0	0.02703	28.62	0.0242518	2	1025.51	0.510653	18.193	0
	High	mAQALPR	2	1	1	P17600	M1(Oxidation)	0	160537052	0.602922	1		0	0.0169	26.5	0.022723	2	802.424	-0.428305	29.2201	0
	High	GSHGQTPSPGALPLGR	1	1	1	P17600		0	1.1982e+07	0.341707	1		0	8.399e-05	21.03	0.0942688	3	1531.8	1.35492	50.1099	0
P11142	Heat shock cognate 71 kDa protein OS=Homo sapiens GN=HSPA8 PE=1 SV=1 - [HSP7C_HUMAN]	300.223	12.69	4	5	9	13	1.61524e+08	0.192413	1		646	70.8542	5.51611
	A2	Sequence	# PSMs	# Proteins	# Protein Groups	Protein Group Accessions	Modifications	ΔCn	Area	(Medium+Heavy)/Light	(Medium+Heavy)/Light Count	(Medium+Heavy)/Light Variability [%]	q-Value	PEP	IonScore	Exp Value	Charge	MH+ [Da]	ΔM [ppm]	RT [min]	# Missed Cleavages
	High	NQVAmNPTNTVFDAK	1	1	1	P11142	M5(Oxidation)	0	71646522				0	5.114e-06	92.98	6.26858e-09	2	1665.79	0.166031	49.1304	0
	High	VEIIANDQGNR	2	7	3	P08107;P11142;P11021		0	130614544				0	0.002348	65.19	4.01066e-06	2	1228.63	0.693903	38.5489	0
	High	TTPSYVAFTDTER	1	6	2	P08107;P11142		0	67162147				0	0.0002161	62.45	5.09123e-06	2	1487.7	0.102382	55.4448	0
	High	DAGTIAGLNVLR	2	1	1	P11142		0	80646940				0	0.00121	39.18	0.00106288	2	1199.67	0.33252	65.3278	0
	High	NQVAmNPTNTVFDAKR	2	1	1	P11142	M5(Oxidation)	0	6.25565e+06				0	0.001272	34.89	0.00398938	3	1821.89	0.923319	48.6963	1
	High	NTTIPTK	2	3	2	P11142;P38646		0	214266588				0.003	0.04023	44.61	0.000759337	2	774.435	-0.192265	27.2366	0
	Medium	LSKEDIER	1	1	1	P11142		0	5.8481e+06	0.192413	1		0.025	0.1273	38.05	0.00272615	2	989.528	1.5222	32.7455	1
	Medium	ITITNDK	1	5	2	P08107;P11142		0	15986495				0.026	0.1301	35.9	0.00691436	2	804.446	-0.426281	30.8701	0
	Medium	GTLDPVEK	1	1	1	P11142		0	139691796				0.037	0.2019	20.69	0.119434	2	858.457	-0.139433	36.2001	0
Q13885	Tubulin beta-2A chain OS=Homo sapiens GN=TUBB2A PE=1 SV=1 - [TBB2A_HUMAN]	286.827	18.65	4	2	8	14	2.21588e+08	0.95608	1		445	49.875	4.89404
	A2	Sequence	# PSMs	# Proteins	# Protein Groups	Protein Group Accessions	Modifications	ΔCn	Area	(Medium+Heavy)/Light	(Medium+Heavy)/Light Count	(Medium+Heavy)/Light Variability [%]	q-Value	PEP	IonScore	Exp Value	Charge	MH+ [Da]	ΔM [ppm]	RT [min]	# Missed Cleavages
	High	INVYYNEAAGNK	2	1	1	Q13885		0	1.26036e+07	0.95608	1		0	8.105e-05	65.01	3.84911e-06	2	1355.66	0.0471475	44.7957	0
	High	LAVNmVPFPR	3	10	4	Q13885;P04350;P68371;P07437	M5(Oxidation)	0	206418136				0	0.001483	64.1	5.25211e-06	2	1159.63	2.12582	60.8274	0
	High	AILVDLEPGTmDSVR	2	4	2	Q13885;P07437	M11(Oxidation)	0	288039024				0	1.416e-06	51.68	0.000103918	2	1631.83	0.139755	64.1714	0
	High	FPGQLNADLr	1	10	4	Q13885;P04350;P68371;P07437	C-Term(Label:18O(1))	0	0				0	0.003222	33.99	0.00524718	2	1132.6	1.35486	56.9204	0
	High	ALTVPELTQQmFDSK	1	2	1	Q13885	M11(Oxidation)	0	7.88149e+07				0	0.001377	26.28	0.0272008	2	1723.86	0.370903	64.5537	0
	High	EVDEQmLNVQNK	1	4	3	Q13885;P68371;P07437	M6(Oxidation)	0	170305992				0	0.001337	22.83	0.0492529	2	1462.69	0.546866	38.0161	0
	High	IREEYPDR	2	7	3	Q13885;P68371;P07437		0	3.26042e+06				0	0.01658	18.05	0.213862	3	1077.53	-0.546015	33.1867	1
	High	KLAVNmVPFPR	1	10	4	Q13885;P04350;P68371;P07437	M6(Oxidation)	0	7.35286e+06				0.003	0.04362	16.38	0.226692	3	1287.73	1.62007	59.9558	1
	Medium	LAVNMVPFPR	1	10	4	Q13885;P04350;P68371;P07437		0	5.84527e+06				0.021	0.0933	23.72	0.0433112	2	1143.64	1.76528	68.7587	0
P68371	Tubulin beta-4B chain OS=Homo sapiens GN=TUBB4B PE=1 SV=1 - [TBB4B_HUMAN]	284.683	18.65	4	1	8	15	2.62778e+08				445	49.799	4.89404
	A2	Sequence	# PSMs	# Proteins	# Protein Groups	Protein Group Accessions	Modifications	ΔCn	Area	(Medium+Heavy)/Light	(Medium+Heavy)/Light Count	(Medium+Heavy)/Light Variability [%]	q-Value	PEP	IonScore	Exp Value	Charge	MH+ [Da]	ΔM [ppm]	RT [min]	# Missed Cleavages
	High	LAVNmVPFPR	3	10	4	Q13885;P04350;P68371;P07437	M5(Oxidation)	0	206418136				0	0.001483	64.1	5.25211e-06	2	1159.63	2.12582	60.8274	0
	High	INVYYNEATGGK	2	1	1	P68371		0	7.52003e+07				0	0.0002038	62.67	5.84015e-06	2	1328.65	0.810011	46.6219	0
	High	ALTVPELTQQmFDAK	2	3	2	P04350;P68371	M11(Oxidation)	0	216356996				0	0.0001204	50.16	0.000147466	2	1707.86	-0.17579	65.2628	0
	High	AVLVDLEPGTmDSVR	2	3	2	P04350;P68371	M11(Oxidation)	0	365558392				0	1.636e-05	38.22	0.00221471	2	1617.82	1.21277	60.7872	0
	High	FPGQLNADLr	1	10	4	Q13885;P04350;P68371;P07437	C-Term(Label:18O(1))	0	0				0	0.003222	33.99	0.00524718	2	1132.6	1.35486	56.9204	0
	High	EVDEQmLNVQNK	1	4	3	Q13885;P68371;P07437	M6(Oxidation)	0	170305992				0	0.001337	22.83	0.0492529	2	1462.69	0.546866	38.0161	0
	High	IREEYPDR	2	7	3	Q13885;P68371;P07437		0	3.26042e+06				0	0.01658	18.05	0.213862	3	1077.53	-0.546015	33.1867	1
	High	KLAVNmVPFPR	1	10	4	Q13885;P04350;P68371;P07437	M6(Oxidation)	0	7.35286e+06				0.003	0.04362	16.38	0.226692	3	1287.73	1.62007	59.9558	1
	Medium	LAVNMVPFPR	1	10	4	Q13885;P04350;P68371;P07437		0	5.84527e+06				0.021	0.0933	23.72	0.0433112	2	1143.64	1.76528	68.7587	0
P63104	14-3-3 protein zeta/delta OS=Homo sapiens GN=YWHAZ PE=1 SV=1 - [1433Z_HUMAN]	279.546	24.9	1	4	6	13	535481832	0.488488	3	147.525	245	27.7277	4.79248
	A2	Sequence	# PSMs	# Proteins	# Protein Groups	Protein Group Accessions	Modifications	ΔCn	Area	(Medium+Heavy)/Light	(Medium+Heavy)/Light Count	(Medium+Heavy)/Light Variability [%]	q-Value	PEP	IonScore	Exp Value	Charge	MH+ [Da]	ΔM [ppm]	RT [min]	# Missed Cleavages
	High	SVTEQGAELSNEER	3	1	1	P63104		0	306913704				0	1.529e-05	73.83	2.6703e-07	2	1548.71	-0.249798	38.2867	0
	High	VVSSIEQK	2	1	1	P63104		0	494336704	0.488488	1		0	0.01587	40.3	0.00177318	2	889.499	-0.288336	28.5626	0
	High	YLAEVAAGDDKK	2	1	1	P63104		0	1.26895e+07	0.0981296	1		0	0.002537	38.28	0.00216947	2	1279.65	1.58912	41.0431	1
	High	FLIPNASQAESK	1	1	1	P63104		0	11011572	1.00871	1		0.003	0.04687	31.56	0.0107179	2	1304.68	0.144619	55.0988	0
	Medium	NLLSVAYK	2	7	6	P31946;Q04917;P61981;P27348;P62258;P63104		0	143520456				0.012	0.07422	29.46	0.0151175	2	907.525	0.129591	57.5692	0
	Medium	LAEQAER	3	7	6	P31946;Q04917;P61981;P27348;P62258;P63104		0	805195088				0.022	0.097	41.98	0.000713103	2	816.421	0.0953451	20.6641	0
P07437	Tubulin beta chain OS=Homo sapiens GN=TUBB PE=1 SV=2 - [TBB5_HUMAN]	275.837	18.69	3	2	8	14	2.21588e+08				444	49.639	4.89404
	A2	Sequence	# PSMs	# Proteins	# Protein Groups	Protein Group Accessions	Modifications	ΔCn	Area	(Medium+Heavy)/Light	(Medium+Heavy)/Light Count	(Medium+Heavy)/Light Variability [%]	q-Value	PEP	IonScore	Exp Value	Charge	MH+ [Da]	ΔM [ppm]	RT [min]	# Missed Cleavages
	High	ISVYYNEATGGK	2	1	1	P07437		0	22591366				0	8.109e-05	65.74	3.00022e-06	2	1301.64	0.479151	46.5719	0
	High	LAVNmVPFPR	3	10	4	Q13885;P04350;P68371;P07437	M5(Oxidation)	0	206418136				0	0.001483	64.1	5.25211e-06	2	1159.63	2.12582	60.8274	0
	High	AILVDLEPGTmDSVR	2	4	2	Q13885;P07437	M11(Oxidation)	0	288039024				0	1.416e-06	51.68	0.000103918	2	1631.83	0.139755	64.1714	0
	High	FPGQLNADLr	1	10	4	Q13885;P04350;P68371;P07437	C-Term(Label:18O(1))	0	0				0	0.003222	33.99	0.00524718	2	1132.6	1.35486	56.9204	0
	High	ALTVPELTQQVFDAK	1	1	1	P07437		0	0				0	0.0146	24.7	0.0343927	2	1659.89	-1.16463	78.3775	0
	High	EVDEQmLNVQNK	1	4	3	Q13885;P68371;P07437	M6(Oxidation)	0	170305992				0	0.001337	22.83	0.0492529	2	1462.69	0.546866	38.0161	0
	High	IREEYPDR	2	7	3	Q13885;P68371;P07437		0	3.26042e+06				0	0.01658	18.05	0.213862	3	1077.53	-0.546015	33.1867	1
	High	KLAVNmVPFPR	1	10	4	Q13885;P04350;P68371;P07437	M6(Oxidation)	0	7.35286e+06				0.003	0.04362	16.38	0.226692	3	1287.73	1.62007	59.9558	1
	Medium	LAVNMVPFPR	1	10	4	Q13885;P04350;P68371;P07437		0	5.84527e+06				0.021	0.0933	23.72	0.0433112	2	1143.64	1.76528	68.7587	0
P61981	14-3-3 protein gamma OS=Homo sapiens GN=YWHAG PE=1 SV=2 - [1433G_HUMAN]	262.573	29.15	2	4	8	13	5.58717e+08	0.112809	1		247	28.2849	4.89404
	A2	Sequence	# PSMs	# Proteins	# Protein Groups	Protein Group Accessions	Modifications	ΔCn	Area	(Medium+Heavy)/Light	(Medium+Heavy)/Light Count	(Medium+Heavy)/Light Variability [%]	q-Value	PEP	IonScore	Exp Value	Charge	MH+ [Da]	ΔM [ppm]	RT [min]	# Missed Cleavages
	High	NVTELNEPLSNEER	2	1	1	P61981		0	3.06211e+07				0	2.815e-05	69.35	1.22533e-06	2	1643.79	0.276164	49.4873	0
	High	YDDmAAAmK	1	2	2	P31946;P61981	M4(Oxidation); M8(Oxidation)	0	91281823				0	0.01495	50.72	8.89589e-06	2	1047.41	0.171675	22.9612	0
	High	ATVVESSEK	2	1	1	P61981		0	173711998	0.112809	1		0.001	0.03294	39.76	0.00168034	2	949.484	0.363448	23.1509	0
	Medium	NLLSVAYK	2	7	6	P31946;Q04917;P61981;P27348;P62258;P63104		0	143520456				0.012	0.07422	29.46	0.0151175	2	907.525	0.129591	57.5692	0
	Medium	VISSIEQK	1	5	4	P31946;Q04917;P61981;P27348		0	697243648				0.018	0.09071	41.11	0.00149084	2	903.515	0.0262321	33.1406	0
	Medium	LAEQAER	3	7	6	P31946;Q04917;P61981;P27348;P62258;P63104		0	805195088				0.022	0.097	41.98	0.000713103	2	816.421	0.0953451	20.6641	0
	Medium	YLAEVATGEKR	1	1	1	P61981		0	0				0.031	0.1677	10.16	1.37346	2	1236.66	3.19226	42.1679	1
	Medium	KIEmVR	1	1	1	P61981	M4(Oxidation)	0	6.1826e+06				0.043	0.2364	26.26	0.0529966	2	791.443	-1.30057	26.8927	1
P13637	Sodium/potassium-transporting ATPase subunit alpha-3 OS=Homo sapiens GN=ATP1A3 PE=1 SV=3 - [AT1A3_HUMAN]	250.734	16.29	4	4	15	17	1.42732e+08	0.535354	3	49.9561	1013	111.677	5.37646
	A2	Sequence	# PSMs	# Proteins	# Protein Groups	Protein Group Accessions	Modifications	ΔCn	Area	(Medium+Heavy)/Light	(Medium+Heavy)/Light Count	(Medium+Heavy)/Light Variability [%]	q-Value	PEP	IonScore	Exp Value	Charge	MH+ [Da]	ΔM [ppm]	RT [min]	# Missed Cleavages
	High	QGAIVAVTGDGVNDSPALK	1	3	3	P05023;P50993;P13637		0	28699463				0	0.0001794	75.69	2.75169e-07	2	1811.95	-1.47915	56.649	0
	High	LNIPVSQVNPR	1	2	2	P05023;P13637		0	120152252				0	0.0006745	51.42	5.94914e-05	2	1236.71	0.418205	53.6217	0
	High	DVAGDASESALLK	1	1	1	P13637		0	20735014	1.15373	1		0	0.0008091	44.54	0.000446482	2	1275.64	-0.489054	50.5751	0
	High	NmVPQQALVIR	1	4	3	P05023;P50993;P13637	M2(Oxidation)	0	44581258				0	0.001575	40.06	0.000986279	2	1284.71	0.238206	51.8776	0
	High	ADIGVAmGIAGSDVSK	2	2	2	P05023;P13637	M7(Oxidation)	0	25050227				0	0.0007362	37.62	0.00243039	2	1506.75	0.930689	49.8624	0
	High	KADIGVAmGIAGSDVSK	2	2	2	P05023;P13637	M8(Oxidation)	0	8.95379e+06				0	0.0007375	29.96	0.0139782	3	1634.84	-0.307381	49.1195	1
	High	GGDRVPADLR	1	4	2	P50993;P13637		0	1.7809e+06				0	0.01128	26.04	0.0247641	3	1055.56	2.54228	40.5065	1
	High	VAEIPFNSTNK	1	4	2	P50993;P13637		0	50537100				0	0.00315	24.89	0.0454075	2	1219.63	0.484177	48.9689	0
	High	VImVTGDHPITAK	1	6	3	P50993;P13637;P05023	M3(Oxidation)	0	8.59915e+06				0	0.008139	10.28	1.1532	3	1397.74	-0.563442	46.2018	0
	High	AQEILAR	1	1	1	P13637		0	76802048				0.006	0.06513	12.27	0.664076	2	800.462	-0.0891453	34.7214	0
	Medium	AAVPDAVGK	1	3	3	P05023;P50993;P13637		0	160229552				0.012	0.07419	31.53	0.00829625	2	827.462	-0.142083	32.9724	0
	Medium	GVVVATGDR	1	1	1	P13637		0	147814540	0.535354	1		0.022	0.1049	39.79	0.00151134	2	873.477	-1.79602	31.4118	0
	Medium	TDKLVNER	1	2	2	P05023;P13637		0	1.35414e+07				0.022	0.1128	24.52	0.0476797	2	974.526	-0.734542	29.8064	1
	Medium	IATLASGLEVGK	1	1	1	P13637		0	6.66947e+06	0.389383	1		0.026	0.1307	21.5	0.064777	2	1158.67	1.34186	57.345	0
	Medium	VDNSSLTGESEPQTR	1	4	3	P05023;P50993;P13637		0	35180061				0.026	0.1304	12.74	0.449631	2	1619.75	-0.842138	35.0923	0
P05023	Sodium/potassium-transporting ATPase subunit alpha-1 OS=Homo sapiens GN=ATP1A1 PE=1 SV=1 - [AT1A1_HUMAN]	248.189	12.22	1	2	11	13	1.08321e+08				1023	112.824	5.49072
	A2	Sequence	# PSMs	# Proteins	# Protein Groups	Protein Group Accessions	Modifications	ΔCn	Area	(Medium+Heavy)/Light	(Medium+Heavy)/Light Count	(Medium+Heavy)/Light Variability [%]	q-Value	PEP	IonScore	Exp Value	Charge	MH+ [Da]	ΔM [ppm]	RT [min]	# Missed Cleavages
	High	QGAIVAVTGDGVNDSPALK	1	3	3	P05023;P50993;P13637		0	28699463				0	0.0001794	75.69	2.75169e-07	2	1811.95	-1.47915	56.649	0
	High	SPDFTNENPLETR	1	1	1	P05023		0	1.8877e+07				0	0.0008363	54.66	2.61614e-05	2	1519.7	-0.93174	56.0331	0
	High	LNIPVSQVNPR	1	2	2	P05023;P13637		0	120152252				0	0.0006745	51.42	5.94914e-05	2	1236.71	0.418205	53.6217	0
	High	NmVPQQALVIR	1	4	3	P05023;P50993;P13637	M2(Oxidation)	0	44581258				0	0.001575	40.06	0.000986279	2	1284.71	0.238206	51.8776	0
	High	GIVVYTGDR	1	1	1	P05023		0	0				0	0.02466	37.95	0.00238884	2	979.521	0.599852	44.7701	0
	High	ADIGVAmGIAGSDVSK	2	2	2	P05023;P13637	M7(Oxidation)	0	25050227				0	0.0007362	37.62	0.00243039	2	1506.75	0.930689	49.8624	0
	High	KADIGVAmGIAGSDVSK	2	2	2	P05023;P13637	M8(Oxidation)	0	8.95379e+06				0	0.0007375	29.96	0.0139782	3	1634.84	-0.307381	49.1195	1
	High	VImVTGDHPITAK	1	6	3	P50993;P13637;P05023	M3(Oxidation)	0	8.59915e+06				0	0.008139	10.28	1.1532	3	1397.74	-0.563442	46.2018	0
	Medium	AAVPDAVGK	1	3	3	P05023;P50993;P13637		0	160229552				0.012	0.07419	31.53	0.00829625	2	827.462	-0.142083	32.9724	0
	Medium	TDKLVNER	1	2	2	P05023;P13637		0	1.35414e+07				0.022	0.1128	24.52	0.0476797	2	974.526	-0.734542	29.8064	1
	Medium	VDNSSLTGESEPQTR	1	4	3	P05023;P50993;P13637		0	35180061				0.026	0.1304	12.74	0.449631	2	1619.75	-0.842138	35.0923	0
P11137	Microtubule-associated protein 2 OS=Homo sapiens GN=MAP2 PE=1 SV=4 - [MAP2_HUMAN]	243.044	6.35	1	11	11	16	5.50744e+07	0.375422	5	76.8983	1827	199.404	4.90674
	A2	Sequence	# PSMs	# Proteins	# Protein Groups	Protein Group Accessions	Modifications	ΔCn	Area	(Medium+Heavy)/Light	(Medium+Heavy)/Light Count	(Medium+Heavy)/Light Variability [%]	q-Value	PEP	IonScore	Exp Value	Charge	MH+ [Da]	ΔM [ppm]	RT [min]	# Missed Cleavages
	High	SVPSETVVEDSR	2	1	1	P11137		0	4.92704e+07				0	9.513e-05	61.8	1.03068e-05	2	1304.63	-0.0392457	40.7146	0
	High	LEATQDmTPSSK	1	1	1	P11137	M7(Oxidation)	0	1.51434e+07				0	0.0003048	55.67	2.1004e-05	2	1323.61	-0.421455	27.1666	0
	High	LASVSADAEVAR	2	1	1	P11137		0	31827707	0.237062	1		0	0.001084	49.37	0.000165902	2	1188.62	-0.381737	41.3253	0
	High	SLQQTSGPATAK	2	1	1	P11137		0	79331643				0	0.002284	37.98	0.00238831	2	1188.62	-0.878406	28.2172	0
	High	ADVQmEFIQGPK	1	1	1	P11137	M5(Oxidation)	0	3.58723e+06	1.49774	1		0	0.002311	27.73	0.0177088	2	1378.67	-0.386406	51.0735	0
	High	EAINQETVQQR	1	1	1	P11137		0	7.47262e+06				0	0.00796	25.38	0.0354925	2	1315.66	-1.14343	33.4066	0
	High	ETAEEVSAR	1	1	1	P11137		0	1.16778e+07	0.375422	1		0	0.01294	20.22	0.0879309	2	991.467	-1.99871	25.3922	0
	High	TPGTPGTPSYPR	1	1	1	P11137		0	36621182				0	0.004033	16.09	0.33584	2	1230.61	-1.08755	38.843	0
	Medium	IGSTDNIK	1	1	1	P11137		0	28480896	0.591766	1		0.028	0.1567	15.98	0.460535	2	847.452	0.21799	28.2308	0
	Medium	SAIEQR	2	1	1	P11137		0	3.80069e+06	0.0772809	1		0.032	0.172	29.9	0.0197496	2	703.373	0.141297	19.4295	0
	Medium	LINQPLPDLK	2	1	1	P11137		0	2.24419e+07				0.04	0.2224	19.64	0.0363953	2	1150.68	-0.476747	58.4019	0
P62258	14-3-3 protein epsilon OS=Homo sapiens GN=YWHAE PE=1 SV=1 - [1433E_HUMAN]	239.776	21.57	1	4	6	10	3.49699e+08	0.474052	2	57.7269	255	29.1554	4.7417
	A2	Sequence	# PSMs	# Proteins	# Protein Groups	Protein Group Accessions	Modifications	ΔCn	Area	(Medium+Heavy)/Light	(Medium+Heavy)/Light Count	(Medium+Heavy)/Light Variability [%]	q-Value	PEP	IonScore	Exp Value	Charge	MH+ [Da]	ΔM [ppm]	RT [min]	# Missed Cleavages
	High	VAGmDVELTVEER	2	1	1	P62258	M4(Oxidation)	0	51570317	0.330165	1		0	6.952e-05	59.01	1.34395e-05	2	1463.7	-0.144105	50.6551	0
	High	EAAENSLVAYK	1	1	1	P62258		0	65765056				0	0.0003339	41.62	0.00107774	2	1194.6	1.94482	44.191	0
	Medium	NLLSVAYK	2	7	6	P31946;Q04917;P61981;P27348;P62258;P63104		0	143520456				0.012	0.07422	29.46	0.0151175	2	907.525	0.129591	57.5692	0
	Medium	QmVETELK	1	1	1	P62258	M2(Oxidation)	0	1.09959e+07				0.016	0.07667	11.2	1.2782	2	993.49	-2.39822	33.595	0
	Medium	IISSIEQK	1	1	1	P62258		0	100381410	0.680646	1		0.022	0.1054	52.64	9.311e-05	2	917.529	-1.06575	36.7741	0
	Medium	LAEQAER	3	7	6	P31946;Q04917;P61981;P27348;P62258;P63104		0	805195088				0.022	0.097	41.98	0.000713103	2	816.421	0.0953451	20.6641	0
P06576	ATP synthase subunit beta, mitochondrial OS=Homo sapiens GN=ATP5B PE=1 SV=3 - [ATPB_HUMAN]	236.242	16.82	1	7	7	12	6.42275e+07	1.47066	4	30.5972	529	56.5246	5.40186
	A2	Sequence	# PSMs	# Proteins	# Protein Groups	Protein Group Accessions	Modifications	ΔCn	Area	(Medium+Heavy)/Light	(Medium+Heavy)/Light Count	(Medium+Heavy)/Light Variability [%]	q-Value	PEP	IonScore	Exp Value	Charge	MH+ [Da]	ΔM [ppm]	RT [min]	# Missed Cleavages
	High	TIAmDGTEGLVR	4	1	1	P06576	M4(Oxidation)	0	157538926	0.740412	1		0	0.001058	62.14	1.00194e-05	2	1278.64	0.768098	46.4688	0
	High	VALVYGQmNEPPGAR	3	1	1	P06576	M8(Oxidation)	0	8618671	1.82336	1		0	0.0007241	46.06	0.000333213	2	1617.81	0.170207	48.7548	0
	High	AIAELGIYPAVDPLDSTSR	1	1	1	P06576		0	1.62477e+07				0	0.001893	37.03	0.00202116	2	1988.03	-0.416923	77.0517	0
	High	ImNVIGEPIDER	1	1	1	P06576	M2(Oxidation)	0	1.88958e+07	1.77586	1		0	0.006222	36.08	0.00315653	2	1401.7	0.0478003	53.1872	0
	High	VVDLLAPYAK	1	1	1	P06576		0	1.00781e+07	1.21791	1		0	0.001237	34.96	0.00323941	2	1088.64	0.88425	65.0768	0
	Medium	IGLFGGAGVGk	1	1	1	P06576	C-Term(Label:18O(1))	0	0				0.014	0.07577	12.76	0.635596	2	977.567	0.195065	60.43	0
	Medium	ADKLAEEHSS	1	1	1	P06576		0	3.14087e+06				0.047	0.2492	11.74	0.475618	2	1086.51	0.3664	23.298	1
P12277	Creatine kinase B-type OS=Homo sapiens GN=CKB PE=1 SV=1 - [KCRB_HUMAN]	229.67	16.54	1	4	4	6	44964124	0.616537	2	74.4734	381	42.6173	5.59229
	A2	Sequence	# PSMs	# Proteins	# Protein Groups	Protein Group Accessions	Modifications	ΔCn	Area	(Medium+Heavy)/Light	(Medium+Heavy)/Light Count	(Medium+Heavy)/Light Variability [%]	q-Value	PEP	IonScore	Exp Value	Charge	MH+ [Da]	ΔM [ppm]	RT [min]	# Missed Cleavages
	High	LAVEALSSLDGDLAGR	2	1	1	P12277		0	4.75921e+06	0.965025	1		0	2.915e-05	71.23	8.51292e-07	2	1586.84	-0.367445	72.8393	0
	High	LEQGQAIDDLmPAQK	1	1	1	P12277	M11(Oxidation)	0	35168263				0	2.082e-05	64.04	4.51654e-06	2	1672.82	0.107819	49.048	0
	High	GTGGVDTAAVGGVFDVSNADR	1	1	1	P12277		0	52882352				0	6.082e-06	61.96	6.84555e-06	2	1964.93	-0.241118	63.6393	0
	High	VLTPELYAELR	2	1	1	P12277		0	46841757	0.393895	1		0	0.0004044	52.38	5.75206e-05	2	1303.73	0.618787	68.1713	0
P52272	Heterogeneous nuclear ribonucleoprotein M OS=Homo sapiens GN=HNRNPM PE=1 SV=3 - [HNRPM_HUMAN]	215.799	14.66	1	11	11	17	5.57157e+07	0.537706	5	305.724	730	77.4643	8.70459
	A2	Sequence	# PSMs	# Proteins	# Protein Groups	Protein Group Accessions	Modifications	ΔCn	Area	(Medium+Heavy)/Light	(Medium+Heavy)/Light Count	(Medium+Heavy)/Light Variability [%]	q-Value	PEP	IonScore	Exp Value	Charge	MH+ [Da]	ΔM [ppm]	RT [min]	# Missed Cleavages
	High	QGGGGGGGSVPGIER	1	1	1	P52272		0	3.41198e+07	0.191766	1		0	2.291e-05	90.34	1.05416e-08	2	1284.63	0.290278	37.4131	0
	High	mATGLER	2	1	1	P52272	M1(Oxidation)	0	3.26936e+07				0	0.02646	33.93	0.0051988	2	793.387	-0.23159	25.4548	0
	High	mGLVmDR	1	1	1	P52272	M1(Oxidation); M5(Oxidation)	0	27763965	0.4703	1		0	0.006411	33.15	0.00319554	2	853.391	0.0378887	29.8906	0
	High	mGPAmGPALGAGIER	2	1	1	P52272	M1(Oxidation); M5(Oxidation)	0	7.68098e+06	2.16451	1		0	0.00837	20.75	0.095919	2	1459.7	-1.01492	47.7549	0
	High	mGPGIDR	2	1	1	P52272	M1(Oxidation)	0	3.0188e+07				0	0.01566	19.26	0.0806323	2	761.36	-0.928783	26.3345	0
	High	mGPAIER	2	1	1	P52272	M1(Oxidation)	0	4.65339e+07				0.001	0.02841	40.46	0.000863518	2	789.392	-0.263269	28.7057	0
	High	mGANSLER	1	1	1	P52272	M1(Oxidation)	0	7.32874e+07				0.002	0.03532	35.95	0.0018295	2	893.414	-0.134305	25.5746	0
	High	mVPAGmGAGLER	2	1	1	P52272	M1(Oxidation); M6(Oxidation)	0	9286020	0.920593	2	94.235	0.003	0.04069	15.92	0.285282	2	1220.58	-0.567091	35.7222	0
	Medium	mAAPIDR	1	1	1	P52272	M1(Oxidation)	0	4.64879e+07				0.016	0.07883	31.6	0.00726423	2	789.392	-0.649865	26.1583	0
	Medium	VGSEIER	1	1	1	P52272		0	47325850				0.017	0.08413	52.64	0.000120335	2	789.41	-0.0107503	26.911	0
	Medium	IGSGVER	2	1	1	P52272		0	22892381				0.022	0.09939	12.99	0.984591	2	717.389	-0.335649	23.9339	0
Q13813	Spectrin alpha chain, non-erythrocytic 1 OS=Homo sapiens GN=SPTAN1 PE=1 SV=3 - [SPTN1_HUMAN]	202.337	5.18	1	13	13	14	3.58587e+07	0.525766	8	52.5471	2472	284.364	5.35107
	A2	Sequence	# PSMs	# Proteins	# Protein Groups	Protein Group Accessions	Modifications	ΔCn	Area	(Medium+Heavy)/Light	(Medium+Heavy)/Light Count	(Medium+Heavy)/Light Variability [%]	q-Value	PEP	IonScore	Exp Value	Charge	MH+ [Da]	ΔM [ppm]	RT [min]	# Missed Cleavages
	High	ITALDEFATK	1	1	1	Q13813		0	1.53035e+07	0.698105	1		0	0.0008311	54.1	5.97184e-05	2	1108.59	0.905509	58.1947	0
	High	VLETAEDIQER	1	1	1	Q13813		0	34141026	0.205773	1		0	0.001222	46.28	0.000284961	2	1302.66	1.28179	42.5921	0
	High	LGESQTLQQFSR	1	1	1	Q13813		0	9.28316e+06	0.284365	1		0	0.000883	42.89	0.000742793	2	1393.71	1.66956	52.1093	0
	High	LFGAAEVQR	1	1	1	Q13813		0	8.22812e+06				0	0.008483	39.91	0.00190405	2	990.537	0.0297443	48.3358	0
	High	VNEVNQFAAK	2	1	1	Q13813		0	40306248				0	0.005924	38.44	0.0022915	2	1119.58	-0.943776	40.0412	0
	High	DVTGAEALLER	1	1	1	Q13813		0	5.90121e+06				0	0.02532	29.07	0.0163521	2	1173.61	2.76421	59.2286	0
	High	SSEEIESAFR	1	1	1	Q13813		0	2.71567e+06				0	0.005503	28.9	0.00985511	2	1154.53	-0.267822	50.0316	0
	High	QEQIDNQTR	1	1	1	Q13813		0	1.20015e+07	0.551165	1		0	0.02168	27.96	0.0137562	2	1131.54	-1.46019	24.1326	0
	High	AINVQEEK	1	1	1	Q13813		0	19410875	0.909153	1		0	0.01816	11	1.01277	2	930.49	0.77747	30.0347	0
	High	DLTGVQNLR	1	1	1	Q13813		0	1.74148e+07	0.358619	1		0.001	0.03388	23.83	0.051543	2	1015.55	0.0767265	47.2659	0
	High	EPIAASTNR	1	1	1	Q13813		0	8.26586e+06	0.604139	1		0.003	0.04653	22.6	0.0533055	2	958.495	0.196831	27.083	0
	Medium	EANQQQQFNR	1	1	1	Q13813		0	3.31288e+07				0.016	0.07749	16.17	0.20773	2	1262.59	1.87385	26.1837	0
	Medium	DLASVQALLR	1	1	1	Q13813		0	4.20153e+06	0.501536	1		0.039	0.2161	17.12	0.140714	2	1085.63	0.565852	71.5259	0
P46459	Vesicle-fusing ATPase OS=Homo sapiens GN=NSF PE=1 SV=3 - [NSF_HUMAN]	202.16	9.54	1	7	7	9	3.20756e+07	0.59919	6	56.9929	744	82.5421	6.94678
	A2	Sequence	# PSMs	# Proteins	# Protein Groups	Protein Group Accessions	Modifications	ΔCn	Area	(Medium+Heavy)/Light	(Medium+Heavy)/Light Count	(Medium+Heavy)/Light Variability [%]	q-Value	PEP	IonScore	Exp Value	Charge	MH+ [Da]	ΔM [ppm]	RT [min]	# Missed Cleavages
	High	VLDDGELLVQQTK	1	1	1	P46459		0	27854159				0	9.527e-06	84.71	3.71871e-08	2	1457.78	-0.388318	57.219	0
	High	AENSSLNLIGK	2	1	1	P46459		0	2.20415e+07				0	0.0004919	62.35	8.29497e-06	2	1145.62	-0.421708	49.7456	0
	High	VVNGPEILNK	2	1	1	P46459		0	9.4958e+06	0.227217	2	10.7105	0	0.01313	33.73	0.0029655	2	1082.62	0.487685	46.7554	0
	High	AESLQVTR	1	1	1	P46459		0	46331095	0.686059	1		0.003	0.04747	44.11	0.00064627	2	903.489	-0.712981	34.0357	0
	High	LLIIGTTSR	1	1	1	P46459		0	7.32887e+06	0.645628	1		0.006	0.0658	21.08	0.0358722	2	973.604	-0.051145	57.0491	0
	Medium	YVGESEANIR	1	1	1	P46459		0	8.75849e+06	1.07023	1		0.016	0.08214	16.48	0.304747	2	1137.55	0.637787	38.7297	0
	Medium	LFADAEEEQR	1	1	1	P46459		0	3492183	0.556092	1		0.022	0.1014	14.5	0.299817	2	1207.56	2.718	41.6093	0
P07196	Neurofilament light polypeptide OS=Homo sapiens GN=NEFL PE=1 SV=3 - [NFL_HUMAN]	200.846	11.42	1	8	8	12	77313070	0.218411	3	44.9297	543	61.4792	4.65283
	A2	Sequence	# PSMs	# Proteins	# Protein Groups	Protein Group Accessions	Modifications	ΔCn	Area	(Medium+Heavy)/Light	(Medium+Heavy)/Light Count	(Medium+Heavy)/Light Variability [%]	q-Value	PEP	IonScore	Exp Value	Charge	MH+ [Da]	ΔM [ppm]	RT [min]	# Missed Cleavages
	High	LAAEDATNEK	2	1	1	P07196		0	146937168				0	0.001748	64.3	4.08689e-06	2	1061.51	-0.544248	27.5183	0
	High	FTVLTESAAK	1	1	1	P07196		0	8244199				0	0.0004061	56.84	2.51522e-05	2	1066.58	0.207485	49.4755	0
	High	YEEEVLSR	2	1	1	P07196		0	41704358				0	0.009699	39.73	0.00128761	2	1024.5	2.33728	39.8888	0
	High	EGLEETLR	1	1	1	P07196		0	43297684	0.600021	1		0	0.002126	24.76	0.0449492	2	946.483	-0.639487	44.2084	0
	High	GADEAALAR	1	1	1	P07196		0	1.10912e+07	0.163555	1		0	0.01277	19.15	0.137429	2	873.442	-0.255265	31.3007	0
	High	AAKDEVSESR	2	1	1	P07196		0	4.98068e+06	0.218411	1		0	0.02365	17.01	0.190109	3	1091.53	-0.0199594	21.9814	1
	High	KGADEAALAR	2	1	1	P07196		0	7.85009e+06				0.003	0.03936	27.69	0.0251068	2	1001.54	-0.221915	31.1612	1
	Medium	YVETPR	1	1	1	P07196		0	34877892				0.027	0.1477	31.11	0.0176965	2	764.393	-1.39266	27.4632	0
P09972	Fructose-bisphosphate aldolase C OS=Homo sapiens GN=ALDOC PE=1 SV=2 - [ALDOC_HUMAN]	190.93	20.88	1	7	8	9	5.47006e+07	1.08394	3	170.063	364	39.4312	6.87354
	A2	Sequence	# PSMs	# Proteins	# Protein Groups	Protein Group Accessions	Modifications	ΔCn	Area	(Medium+Heavy)/Light	(Medium+Heavy)/Light Count	(Medium+Heavy)/Light Variability [%]	q-Value	PEP	IonScore	Exp Value	Charge	MH+ [Da]	ΔM [ppm]	RT [min]	# Missed Cleavages
	High	DNAGAATEEFIK	1	1	1	P09972		0	45784053	0.287167	1		0	3.758e-05	70.02	1.03522e-06	2	1265.6	0.953759	50.5834	0
	High	GILAADESVGSmAK	1	1	1	P09972	M12(Oxidation)	0	3.49551e+07	1.08394	1		0	9.398e-06	60.3	1.2319e-05	2	1364.67	1.22205	46.9683	0
	High	AEVNGLAAQGK	1	1	1	P09972		0	7.34178e+07				0	0.0008332	55.56	2.73802e-05	2	1057.56	0.400177	32.5656	0
	High	DGADFAK	1	2	2	P04075;P09972		0	1.32858e+07				0	0.01853	29.54	0.0114508	2	723.331	-0.0610917	26.9877	0
	High	ELSDIALR	2	1	1	P09972		0	44899984				0	0.01406	26.36	0.0305193	2	916.508	-2.06123	50.9238	0
	High	LSQIGVENTEENRR	1	1	1	P09972		0	0				0	0.0247	15.04	0.45746	3	1644.83	1.18132	41.9124	1
	High	DNAGAATEEFIKR	1	1	1	P09972		0	767970	2.37949	1		0.003	0.05413	24.59	0.0490026	2	1421.7	-0.127646	49.7114	1
	High	QVLFSADDR	1	1	1	P09972		0	0				0.005	0.06327	19.45	0.158902	2	1050.52	2.35319	48.4521	0
Q14194	Dihydropyrimidinase-related protein 1 OS=Homo sapiens GN=CRMP1 PE=1 SV=1 - [DPYL1_HUMAN]	190.256	11.89	1	3	6	8	1.80363e+08	0.397557	3	88.925	572	62.1447	7.03467
	A2	Sequence	# PSMs	# Proteins	# Protein Groups	Protein Group Accessions	Modifications	ΔCn	Area	(Medium+Heavy)/Light	(Medium+Heavy)/Light Count	(Medium+Heavy)/Light Variability [%]	q-Value	PEP	IonScore	Exp Value	Charge	MH+ [Da]	ΔM [ppm]	RT [min]	# Missed Cleavages
	High	mDENQFVAVTSTNAAK	2	3	3	Q16555;Q14194;Q14195	M1(Oxidation)	0	82332150				0	1.216e-06	105.3	2.13963e-10	2	1741.81	-0.435628	48.8801	0
	High	QIGENLIVPGGVK	1	2	2	Q16555;Q14194		0	82815422				0	0.0003556	53.67	2.49131e-05	2	1323.76	0.890283	61.0633	0
	High	IVFEDGNINVNK	1	1	1	Q14194		0	5.31274e+06	0.665265	1		0	0.02671	19.59	0.164301	2	1361.71	0.597345	55.9646	0
	Medium	VFGLQGVSR	1	1	1	Q14194		0	6.80053e+06	0.397557	1		0.022	0.1034	24.76	0.0521344	2	962.541	-1.37905	55.7103	0
	Medium	IVAPPGGR	2	3	3	Q16555;Q14194;Q14195		0	375940704				0.027	0.1417	30.7	0.00749001	2	766.457	0.035943	31.6194	0
	Medium	SAADIIALAR	1	1	1	Q14194		0	12142527	0.158964	1		0.027	0.1444	12.5	0.562341	2	1000.58	2.10355	62.569	0
P14136	Glial fibrillary acidic protein OS=Homo sapiens GN=GFAP PE=1 SV=1 - [GFAP_HUMAN]	181.719	16.9	1	8	8	11	88946862	1.08193	4	12.6539	432	49.8496	5.51611
	A2	Sequence	# PSMs	# Proteins	# Protein Groups	Protein Group Accessions	Modifications	ΔCn	Area	(Medium+Heavy)/Light	(Medium+Heavy)/Light Count	(Medium+Heavy)/Light Variability [%]	q-Value	PEP	IonScore	Exp Value	Charge	MH+ [Da]	ΔM [ppm]	RT [min]	# Missed Cleavages
	High	EAASYQEALAR	1	1	1	P14136		0	84355494	1.11957	1		0	0.0006069	59.72	1.34391e-05	2	1208.59	0.490507	42.6904	0
	High	ALAAELNQLR	2	1	1	P14136		0	35016052				0	0.002933	51.11	5.84719e-05	2	1098.63	0.993827	58.588	0
	High	QEADEATLAR	2	1	1	P14136		0	54055242	1.04556	1		0	0.0002788	33.96	0.00433934	2	1103.53	-1.14139	32.7982	0
	High	DGEVIKESK	1	1	1	P14136		0	4.12617e+06				0	0.01925	22.91	0.0785432	2	1004.53	0.916583	25.6127	1
	High	AEmmELNDR	1	1	1	P14136	M3(Oxidation); M4(Oxidation)	0	69730444	1.4154	1		0	0.02415	19.12	0.0195939	2	1140.47	0.365607	27.2564	0
	High	LEEEGQSLK	1	1	1	P14136		0	4.88044e+06				0.001	0.03469	29.01	0.016768	2	1032.52	0.915055	32.5162	0
	High	ELQEQLAR	1	1	1	P14136		0	112754648	0.944524	1		0.003	0.04848	30.16	0.0126744	2	986.525	-1.09682	37.664	0
	High	ETSLDTK	2	1	1	P14136		0	34750799				0.003	0.04437	27.47	0.0284706	2	793.394	0.570174	20.7077	0
P15259	Phosphoglycerate mutase 2 OS=Homo sapiens GN=PGAM2 PE=1 SV=3 - [PGAM2_HUMAN]	179.096	4.35	2	2	2	4	3.64507e+07	0.642062	1		253	28.7478	8.88037
	A2	Sequence	# PSMs	# Proteins	# Protein Groups	Protein Group Accessions	Modifications	ΔCn	Area	(Medium+Heavy)/Light	(Medium+Heavy)/Light Count	(Medium+Heavy)/Light Variability [%]	q-Value	PEP	IonScore	Exp Value	Charge	MH+ [Da]	ΔM [ppm]	RT [min]	# Missed Cleavages
	High	KAmEAVAAQGK	2	2	1	P15259	M3(Oxidation)	0	3.38301e+07	0.642062	1		0	0.0001444	79.75	1.9914e-07	2	1119.58	0.385127	20.9827	1
	High	AmEAVAAQGK	2	2	1	P15259	M2(Oxidation)	0	3.90713e+07				0	0.003342	54.35	6.40908e-05	2	991.488	0.372615	20.623	0
P04406	Glyceraldehyde-3-phosphate dehydrogenase OS=Homo sapiens GN=GAPDH PE=1 SV=3 - [G3P_HUMAN]	170.972	17.01	1	6	6	12	2.14302e+08				335	36.0304	8.45557
	A2	Sequence	# PSMs	# Proteins	# Protein Groups	Protein Group Accessions	Modifications	ΔCn	Area	(Medium+Heavy)/Light	(Medium+Heavy)/Light Count	(Medium+Heavy)/Light Variability [%]	q-Value	PEP	IonScore	Exp Value	Charge	MH+ [Da]	ΔM [ppm]	RT [min]	# Missed Cleavages
	High	GALQNIIPASTGAAK	3	1	1	P04406		0	131805368				0	6.298e-06	62.71	4.39353e-06	2	1411.79	0.361139	58.8546	0
	High	AGAHLQGGAK	3	1	1	P04406		0	3.39797e+06				0	0.001987	27.1	0.0252505	2	909.49	-0.0466544	21.178	0
	High	QASEGPLK	2	1	1	P04406		0	123527872				0.003	0.03912	52.96	6.29752e-05	2	829.442	0.959688	26.7584	0
	High	VGVNGFGR	1	1	1	P04406		0	302717996				0.003	0.04026	49.44	0.000254829	2	805.432	0.460702	40.916	0
	Medium	TVDGPSGK	1	1	1	P04406		0	177051				0.014	0.07646	22.86	0.0615952	2	760.383	-0.974774	15.2283	0
	Medium	VIPELNGK	2	1	1	P04406		0	2.08383e+08				0.016	0.08104	11.43	0.435267	2	869.509	0.0708126	43.4262	0
P31946	14-3-3 protein beta/alpha OS=Homo sapiens GN=YWHAB PE=1 SV=3 - [1433B_HUMAN]	168.194	18.7	2	1	5	8	548653064				246	28.0648	4.83057
	A2	Sequence	# PSMs	# Proteins	# Protein Groups	Protein Group Accessions	Modifications	ΔCn	Area	(Medium+Heavy)/Light	(Medium+Heavy)/Light Count	(Medium+Heavy)/Light Variability [%]	q-Value	PEP	IonScore	Exp Value	Charge	MH+ [Da]	ΔM [ppm]	RT [min]	# Missed Cleavages
	High	YDDmAAAmK	1	2	2	P31946;P61981	M4(Oxidation); M8(Oxidation)	0	91281823				0	0.01495	50.72	8.89589e-06	2	1047.41	0.171675	22.9612	0
	High	AVTEQGHELSNEER	1	1	1	P31946		0	1.57504e+06				0	0.01772	13.66	0.322895	3	1598.74	-0.265736	34.5461	0
	Medium	NLLSVAYK	2	7	6	P31946;Q04917;P61981;P27348;P62258;P63104		0	143520456				0.012	0.07422	29.46	0.0151175	2	907.525	0.129591	57.5692	0
	Medium	VISSIEQK	1	5	4	P31946;Q04917;P61981;P27348		0	697243648				0.018	0.09071	41.11	0.00149084	2	903.515	0.0262321	33.1406	0
	Medium	LAEQAER	3	7	6	P31946;Q04917;P61981;P27348;P62258;P63104		0	805195088				0.022	0.097	41.98	0.000713103	2	816.421	0.0953451	20.6641	0
P69905	Hemoglobin subunit alpha OS=Homo sapiens GN=HBA1 PE=1 SV=2 - [HBA_HUMAN]	167.791	19.01	2	4	4	10	2.00144e+08	0.289363	5	137.616	142	15.2479	8.67529
	A2	Sequence	# PSMs	# Proteins	# Protein Groups	Protein Group Accessions	Modifications	ΔCn	Area	(Medium+Heavy)/Light	(Medium+Heavy)/Light Count	(Medium+Heavy)/Light Variability [%]	q-Value	PEP	IonScore	Exp Value	Charge	MH+ [Da]	ΔM [ppm]	RT [min]	# Missed Cleavages
	High	mFLSFPTTK	1	1	1	P69905	M1(Oxidation)	0	148447800				0	0.009468	51.3	9.97062e-05	2	1087.55	0.847958	63.4539	0
	High	VLSPADKTNVK	5	1	1	P69905		0	2.20754e+08	0.243076	3	26.2802	0	0.02515	33.98	0.00357951	2	1171.67	0.180307	33.2485	1
	High	VDPVNFK	2	2	1	P69905		0	153735404	0.632771	1		0.001	0.03391	32.97	0.0111782	2	818.441	0.522179	43.6323	0
	Medium	VLSPADK	2	1	1	P69905		0	225942080	0.579958	1		0.017	0.0862	41.66	0.000897275	2	729.414	0.418157	26.5403	0
P04264	Keratin, type II cytoskeletal 1 OS=Homo sapiens GN=KRT1 PE=1 SV=6 - [K2C1_HUMAN]	167.263	9.78	2	6	6	9	3.65015e+07				644	65.999	8.11865
	A2	Sequence	# PSMs	# Proteins	# Protein Groups	Protein Group Accessions	Modifications	ΔCn	Area	(Medium+Heavy)/Light	(Medium+Heavy)/Light Count	(Medium+Heavy)/Light Variability [%]	q-Value	PEP	IonScore	Exp Value	Charge	MH+ [Da]	ΔM [ppm]	RT [min]	# Missed Cleavages
	High	GSGGGSSGGSIGGR	3	1	1	P04264		0	4.05501e+07				0	6.586e-06	76.81	1.38619e-07	2	1092.5	0.283868	19.6445	0
	High	TLLEGEESR	2	1	1	P04264		0	65615651				0	0.01389	44.55	0.00048053	2	1033.52	0.0769993	38.9519	0
	High	YEELQITAGR	1	2	1	P04264		0	3.33863e+06				0	0.0166	22.43	0.102009	2	1179.6	3.65599	49.8891	0
	High	AEAESLYQSK	1	1	1	P04264		0	1.97376e+06				0	0.02594	13.71	0.531998	2	1125.55	3.58133	35.6933	0
	Medium	FLEQQNQVLQTK	1	1	1	P04264		0	1.15524e+06				0.016	0.08032	10.93	1.0938	2	1475.78	-1.7339	49.3284	0
	Medium	SISISVAR	1	1	1	P04264		0	1.67926e+06				0.039	0.2136	16.28	0.395648	2	832.492	4.50207	46.1483	0
Q562R1	Beta-actin-like protein 2 OS=Homo sapiens GN=ACTBL2 PE=1 SV=2 - [ACTBL_HUMAN]	166.297	16.22	2	1	5	9	6.89262e+07				376	41.976	5.59229
	A2	Sequence	# PSMs	# Proteins	# Protein Groups	Protein Group Accessions	Modifications	ΔCn	Area	(Medium+Heavy)/Light	(Medium+Heavy)/Light Count	(Medium+Heavy)/Light Variability [%]	q-Value	PEP	IonScore	Exp Value	Charge	MH+ [Da]	ΔM [ppm]	RT [min]	# Missed Cleavages
	High	SYELPDGQVITIGNER	3	10	2	P60709;Q562R1		0	57970606				0	4.565e-05	93.52	5.4912e-09	2	1790.89	-0.395529	68.5728	0
	High	HQGVmVGmGQK	3	7	2	P60709;Q562R1	M5(Oxidation); M8(Oxidation)	0	97451070				0	0.005028	29.28	0.0108589	3	1203.56	-0.341312	27.033	0
	High	VAPDEHPILLTEAPLNPK	1	1	1	Q562R1		0	0				0	0.001496	17.33	0.122976	3	1954.06	0.211469	62.4026	0
	High	DLTDYLmk	1	7	2	P60709;Q562R1	M7(Oxidation); C-Term(Label:18O(1))	0	51356878				0.003	0.05184	24.95	0.0265508	2	1016.49	1.02956	57.1465	0
	Medium	IIAPPERK	1	7	2	P60709;Q562R1		0	1.55068e+07				0.018	0.09035	28.41	0.00519162	2	923.567	-0.817895	34.1082	1
P14618	Pyruvate kinase isozymes M1/M2 OS=Homo sapiens GN=PKM PE=1 SV=4 - [KPYM_HUMAN]	165.58	17.51	2	9	9	13	9.11031e+07	0.452096	6	43.5833	531	57.9	7.84033
	A2	Sequence	# PSMs	# Proteins	# Protein Groups	Protein Group Accessions	Modifications	ΔCn	Area	(Medium+Heavy)/Light	(Medium+Heavy)/Light Count	(Medium+Heavy)/Light Variability [%]	q-Value	PEP	IonScore	Exp Value	Charge	MH+ [Da]	ΔM [ppm]	RT [min]	# Missed Cleavages
	High	LDIDSPPITAR	2	1	1	P14618		0	2.43391e+07	0.402109	1		0	0.009588	51.64	7.43755e-05	2	1197.65	0.769615	54.8939	0
	High	VNFAmNVGK	1	1	1	P14618	M5(Oxidation)	0	178574452				0	0.001211	45.75	0.000396448	2	995.498	-0.208978	40.7299	0
	High	GDLGIEIPAEK	1	2	1	P14618		0	54346684				0	0.0004942	33.13	0.00649354	2	1141.61	0.455437	58.4594	0
	High	GSGTAEVELK	2	1	1	P14618		0	40388027	0.508297	1		0	0.003788	31.25	0.0115109	2	990.511	0.461834	35.8945	0
	High	GSGTAEVELKK	1	1	1	P14618		0	1.59329e+07	0.196737	1		0	0.006124	25.55	0.0392843	2	1118.61	1.88279	33.1574	1
	High	VVEVGSK	2	1	1	P14618		0	4.63521e+06	0.945382	1		0.003	0.04217	27.19	0.0540488	2	717.415	0.93561	22.8857	0
	High	KGVNLPGAAVDLPAVSEK	2	1	1	P14618		0	0				0.003	0.03639	26.03	0.0112257	3	1764.99	1.81947	65.1356	1
	High	ASDVHEVR	1	1	1	P14618		0	3.58802e+06	0.511342	1		0.003	0.0387	16.88	0.295367	2	912.452	-1.33187	22.85	0
	Medium	GADFLVTEVENGGSLGSK	1	1	1	P14618		0	2.37007e+06	0.291336	1		0.018	0.08959	11	0.977024	2	1779.88	0.613241	69.8433	0
P27348	14-3-3 protein theta OS=Homo sapiens GN=YWHAQ PE=1 SV=1 - [1433T_HUMAN]	162.84	17.55	2	2	5	9	548653064	0.840816	1		245	27.7468	4.77979
	A2	Sequence	# PSMs	# Proteins	# Protein Groups	Protein Group Accessions	Modifications	ΔCn	Area	(Medium+Heavy)/Light	(Medium+Heavy)/Light Count	(Medium+Heavy)/Light Variability [%]	q-Value	PEP	IonScore	Exp Value	Charge	MH+ [Da]	ΔM [ppm]	RT [min]	# Missed Cleavages
	High	AVTEQGAELSNEER	2	1	1	P27348		0	1.85267e+07	0.840816	1		0	0.0009924	46.35	0.000201613	2	1532.72	0.647777	37.3166	0
	High	TELIQK	1	1	1	P27348		0	42466039				0.003	0.04762	11.73	1.41671	2	731.43	0.229604	31.4524	0
	Medium	NLLSVAYK	2	7	6	P31946;Q04917;P61981;P27348;P62258;P63104		0	143520456				0.012	0.07422	29.46	0.0151175	2	907.525	0.129591	57.5692	0
	Medium	VISSIEQK	1	5	4	P31946;Q04917;P61981;P27348		0	697243648				0.018	0.09071	41.11	0.00149084	2	903.515	0.0262321	33.1406	0
	Medium	LAEQAER	3	7	6	P31946;Q04917;P61981;P27348;P62258;P63104		0	805195088				0.022	0.097	41.98	0.000713103	2	816.421	0.0953451	20.6641	0
P35527	Keratin, type I cytoskeletal 9 OS=Homo sapiens GN=KRT9 PE=1 SV=3 - [K1C9_HUMAN]	162.067	8.99	1	5	5	7	5.67952e+07	0.377134	2	71.3614	623	62.0268	5.23682
	A2	Sequence	# PSMs	# Proteins	# Protein Groups	Protein Group Accessions	Modifications	ΔCn	Area	(Medium+Heavy)/Light	(Medium+Heavy)/Light Count	(Medium+Heavy)/Light Variability [%]	q-Value	PEP	IonScore	Exp Value	Charge	MH+ [Da]	ΔM [ppm]	RT [min]	# Missed Cleavages
	High	SGGGGGGGLGSGGSIR	1	1	1	P35527		0	70119482	0.24466	1		0	1.014e-06	71.16	7.73253e-07	2	1232.6	0.640201	33.8208	0
	High	FSSSSGYGGGSSR	1	1	1	P35527		0	4.185e+07				0	0.001171	48.34	4.25009e-05	2	1235.53	-0.713598	29.784	0
	High	STmQELNSR	1	1	1	P35527	M3(Oxidation)	0	5.84162e+07				0	0.008576	43.17	0.000320495	2	1081.49	0.351555	24.9923	0
	High	QGVDADINGLR	2	1	1	P35527		0	1.30344e+07	0.581338	1		0	0.01686	21.32	0.100355	2	1157.59	-2.11018	48.911	0
	High	mTLDDFR	2	1	1	P35527	M1(Oxidation)	0	3.64088e+07				0	0.01323	17.69	0.085959	2	913.408	0.0531683	44.1522	0
P00505	Aspartate aminotransferase, mitochondrial OS=Homo sapiens GN=GOT2 PE=1 SV=3 - [AATM_HUMAN]	161.38	10	1	4	4	6	2.04698e+07	0.166779	1		430	47.4873	9.01221
	A2	Sequence	# PSMs	# Proteins	# Protein Groups	Protein Group Accessions	Modifications	ΔCn	Area	(Medium+Heavy)/Light	(Medium+Heavy)/Light Count	(Medium+Heavy)/Light Variability [%]	q-Value	PEP	IonScore	Exp Value	Charge	MH+ [Da]	ΔM [ppm]	RT [min]	# Missed Cleavages
	High	KAEAQIAAK	3	1	1	P00505		0	3.54435e+07	0.166779	1		0	0.007393	44.25	0.000375837	2	929.541	-0.0224091	23.9969	1
	High	IAAAILNTPDLR	1	1	1	P00505		0	1.50228e+07				0	0.002147	44.19	0.000177196	2	1267.74	3.02819	62.6769	0
	High	FVTVQTISGTGALR	1	1	1	P00505		0	10943230				0	0.0008671	42.9	0.000474397	2	1449.81	-0.24806	61.6961	0
	High	NmGLYGER	1	1	1	P00505	M2(Oxidation)	0	8.58737e+06				0.003	0.03996	36.92	0.0012499	2	955.429	-1.29117	33.3702	0
Q14195	Dihydropyrimidinase-related protein 3 OS=Homo sapiens GN=DPYSL3 PE=1 SV=1 - [DPYL3_HUMAN]	155.996	5.96	1	1	3	5	1.53317e+08				570	61.9241	6.49365
	A2	Sequence	# PSMs	# Proteins	# Protein Groups	Protein Group Accessions	Modifications	ΔCn	Area	(Medium+Heavy)/Light	(Medium+Heavy)/Light Count	(Medium+Heavy)/Light Variability [%]	q-Value	PEP	IonScore	Exp Value	Charge	MH+ [Da]	ΔM [ppm]	RT [min]	# Missed Cleavages
	High	mDENQFVAVTSTNAAK	2	3	3	Q16555;Q14194;Q14195	M1(Oxidation)	0	82332150				0	1.216e-06	105.3	2.13963e-10	2	1741.81	-0.435628	48.8801	0
	High	SAADLISQAR	1	1	1	Q14195		0	1.6779e+06				0.003	0.04616	30.82	0.0131643	2	1031.55	3.63929	46.6729	0
	Medium	IVAPPGGR	2	3	3	Q16555;Q14194;Q14195		0	375940704				0.027	0.1417	30.7	0.00749001	2	766.457	0.035943	31.6194	0
P68871	Hemoglobin subunit beta OS=Homo sapiens GN=HBB PE=1 SV=2 - [HBB_HUMAN]	155.857	22.45	1	1	3	8	99910853	0.931851	1		147	15.9883	7.28369
	A2	Sequence	# PSMs	# Proteins	# Protein Groups	Protein Group Accessions	Modifications	ΔCn	Area	(Medium+Heavy)/Light	(Medium+Heavy)/Light Count	(Medium+Heavy)/Light Variability [%]	q-Value	PEP	IonScore	Exp Value	Charge	MH+ [Da]	ΔM [ppm]	RT [min]	# Missed Cleavages
	High	VNVDEVGGEALGR	2	1	1	P68871		0	162084332	0.931851	1		0	1.257e-05	72.41	6.94681e-07	2	1314.67	0.512406	51.349	0
	High	VHLTPEEK	5	2	2	P68871;P02042		0	37737374				0	0.02671	31.36	0.0109671	2	952.51	0.462152	33.8363	0
	High	VVAGVANALAHK	1	2	2	P68871;P02042		0	0				0	0.01408	10.11	0.589869	3	1149.67	-1.30763	49.3462	0
P22626	Heterogeneous nuclear ribonucleoproteins A2/B1 OS=Homo sapiens GN=HNRNPA2B1 PE=1 SV=2 - [ROA2_HUMAN]	150.2	12.46	1	4	4	6	5.21993e+07	0.375676	3	28.9062	353	37.4067	8.95361
	A2	Sequence	# PSMs	# Proteins	# Protein Groups	Protein Group Accessions	Modifications	ΔCn	Area	(Medium+Heavy)/Light	(Medium+Heavy)/Light Count	(Medium+Heavy)/Light Variability [%]	q-Value	PEP	IonScore	Exp Value	Charge	MH+ [Da]	ΔM [ppm]	RT [min]	# Missed Cleavages
	High	QEmQEVQSSR	2	1	1	P22626	M3(Oxidation)	0	41986120	0.454773	1		0	0.0009053	61.45	3.07942e-06	2	1237.55	0.379033	20.3516	0
	High	TLETVPLER	1	1	1	P22626		0	16629190	0.375676	1		0	0.004972	28.83	0.0132882	2	1057.59	-0.170817	50.0216	0
	High	GGGGNFGPGPGSNFR	1	1	1	P22626		0	7.39886e+07	0.161834	1		0	3.924e-05	22.7	0.0346386	2	1377.63	0.0311407	47.1406	0
	High	GGNFGFGDSR	2	1	1	P22626		0	4.06232e+07				0.003	0.04515	28.34	0.00490959	2	1013.44	-1.38639	45.7091	0
Q04917	14-3-3 protein eta OS=Homo sapiens GN=YWHAH PE=1 SV=4 - [1433F_HUMAN]	149.581	21.14	3	3	6	10	548653064	0.319216	1		246	28.201	4.84326
	A2	Sequence	# PSMs	# Proteins	# Protein Groups	Protein Group Accessions	Modifications	ΔCn	Area	(Medium+Heavy)/Light	(Medium+Heavy)/Light Count	(Medium+Heavy)/Light Variability [%]	q-Value	PEP	IonScore	Exp Value	Charge	MH+ [Da]	ΔM [ppm]	RT [min]	# Missed Cleavages
	High	AVTELNEPLSNEDR	2	1	1	Q04917		0	25551419	0.319216	1		0	0.01159	29.14	0.0131041	2	1586.77	0.886168	48.8826	0
	Medium	NLLSVAYK	2	7	6	P31946;Q04917;P61981;P27348;P62258;P63104		0	143520456				0.012	0.07422	29.46	0.0151175	2	907.525	0.129591	57.5692	0
	Medium	EQLLQR	1	2	1	Q04917		0	4736380				0.017	0.08333	23.84	0.0596854	2	786.449	2.28203	35.1848	0
	Medium	VISSIEQK	1	5	4	P31946;Q04917;P61981;P27348		0	697243648				0.018	0.09071	41.11	0.00149084	2	903.515	0.0262321	33.1406	0
	Medium	LAEQAER	3	7	6	P31946;Q04917;P61981;P27348;P62258;P63104		0	805195088				0.022	0.097	41.98	0.000713103	2	816.421	0.0953451	20.6641	0
	Medium	YDDmASAmK	1	1	1	Q04917	M4(Oxidation); M8(Oxidation)	0	1.50283e+07				0.037	0.2026	13.51	0.0444601	2	1063.41	0.478718	21.5575	0
Q01082	Spectrin beta chain, non-erythrocytic 1 OS=Homo sapiens GN=SPTBN1 PE=1 SV=2 - [SPTB2_HUMAN]	149.547	3.72	1	10	10	11	4.39463e+07	0.509548	4	6.4729	2364	274.439	5.56689
	A2	Sequence	# PSMs	# Proteins	# Protein Groups	Protein Group Accessions	Modifications	ΔCn	Area	(Medium+Heavy)/Light	(Medium+Heavy)/Light Count	(Medium+Heavy)/Light Variability [%]	q-Value	PEP	IonScore	Exp Value	Charge	MH+ [Da]	ΔM [ppm]	RT [min]	# Missed Cleavages
	High	VDSIDDR	1	1	1	Q01082		0	1.66476e+07	0.475404	1		0	0.01902	67.25	1.79888e-06	2	819.384	-0.75265	26.0135	0
	High	VAVVNQIAR	2	1	1	Q01082		0	4.6469e+07				0	0.001562	55.38	8.8369e-06	2	969.584	-0.387318	43.4548	0
	High	DQNTVETLQR	1	1	1	Q01082		0	27211701				0	0.0004755	38.93	0.00181672	2	1203.6	0.533565	36.1521	0
	High	ILSSDDYGK	1	1	1	Q01082		0	1.02341e+07				0	0.009367	29.9	0.0112562	2	997.485	1.57976	35.2244	0
	High	VLDNAIETEK	1	1	1	Q01082		0	2.44112e+07				0	0.007994	22.52	0.0898411	2	1131.59	-1.59189	40.5554	0
	High	QLQEDAAR	1	1	1	Q01082		0	2.51482e+07				0	0.01214	17.88	0.146637	2	930.464	0.0597084	24.4964	0
	High	VQAVVAVAR	1	1	1	Q01082		0	58158232	0.500524	1		0.001	0.03275	12.63	0.141897	2	912.562	-0.505113	39.8483	0
	High	EIGQSVDEVEK	1	1	1	Q01082		0	23689404				0.003	0.04531	12.56	0.707148	2	1232.6	3.13679	39.3534	0
	High	DLVAIEAK	1	1	1	Q01082		0	1.41107e+07	0.518735	1		0.004	0.05673	13.08	0.779883	2	858.493	0.200854	47.0411	0
	Medium	LSGIEER	1	1	1	Q01082		0	1.54003e+07	0.730135	1		0.031	0.1659	27.33	0.0390196	2	803.426	0.262195	32.8166	0
P04075	Fructose-bisphosphate aldolase A OS=Homo sapiens GN=ALDOA PE=1 SV=2 - [ALDOA_HUMAN]	144.317	14.29	1	6	7	8	5.53618e+07	0.719048	5	69.1275	364	39.3953	8.08936
	A2	Sequence	# PSMs	# Proteins	# Protein Groups	Protein Group Accessions	Modifications	ΔCn	Area	(Medium+Heavy)/Light	(Medium+Heavy)/Light Count	(Medium+Heavy)/Light Variability [%]	q-Value	PEP	IonScore	Exp Value	Charge	MH+ [Da]	ΔM [ppm]	RT [min]	# Missed Cleavages
	High	GILAADESTGSIAK	1	1	1	P04075		0	24826898	1.09803	1		0	9.294e-06	83.37	7.57122e-08	2	1332.7	0.639539	49.582	0
	High	LQSIGTENTEENR	1	1	1	P04075		0	1.27985e+07	0.719048	1		0	0.0003388	46.07	0.00025088	2	1490.71	-0.0159779	35.6901	0
	High	DGADFAK	1	2	2	P04075;P09972		0	1.32858e+07				0	0.01853	29.54	0.0114508	2	723.331	-0.0610917	26.9877	0
	High	AAQEEYVKR	1	1	1	P04075		0	25025575	0.140321	1		0	0.01362	25.35	0.0462412	3	1093.56	0.0860243	28.7991	1
	High	LQSIGTENTEENRR	1	1	1	P04075		0	9611595				0	0.0009834	15.35	0.393853	3	1646.81	1.24676	36.7272	1
	High	AAQEEYVK	1	1	1	P04075		0	35443242	1.09605	1		0.001	0.03374	20.47	0.144935	2	937.464	1.04247	28.8914	0
	High	ALQASALK	2	1	1	P04075		0	105616482	0.533888	1		0.003	0.05317	20.74	0.10373	2	801.484	1.11162	35.6446	0
P07195	L-lactate dehydrogenase B chain OS=Homo sapiens GN=LDHB PE=1 SV=2 - [LDHB_HUMAN]	141.313	13.17	2	4	5	8	7.36329e+07	0.809783	1		334	36.6151	6.04932
	A2	Sequence	# PSMs	# Proteins	# Protein Groups	Protein Group Accessions	Modifications	ΔCn	Area	(Medium+Heavy)/Light	(Medium+Heavy)/Light Count	(Medium+Heavy)/Light Variability [%]	q-Value	PEP	IonScore	Exp Value	Charge	MH+ [Da]	ΔM [ppm]	RT [min]	# Missed Cleavages
	High	GLTSVINQK	2	1	1	P07195		0	2.20611e+07				0	0.006322	55.19	4.14687e-05	2	959.553	0.687444	45.1469	0
	High	IVADKDYSVTANSK	2	1	1	P07195		0	0				0	0.01538	31.71	0.00920731	3	1510.77	-0.610549	38.669	1
	High	IVVVTAGVR	2	1	1	P07195		0	29314737				0.003	0.03886	31.33	0.00224543	2	913.584	0.61559	46.7806	0
	Medium	LNLVQR	1	3	2	P07195;P00338		0	169522936				0.017	0.08445	29.34	0.00942942	2	742.457	0.310663	40.505	0
	Medium	YLmAEK	1	1	1	P07195	M3(Oxidation)	0	5.5361e+06	0.809783	1		0.023	0.1234	26.93	0.0152076	2	770.375	-0.216298	27.5944	0
P40925	Malate dehydrogenase, cytoplasmic OS=Homo sapiens GN=MDH1 PE=1 SV=4 - [MDHC_HUMAN]	138.685	17.07	1	7	7	10	7.52788e+07	0.43747	3	201.176	334	36.403	7.35693
	A2	Sequence	# PSMs	# Proteins	# Protein Groups	Protein Group Accessions	Modifications	ΔCn	Area	(Medium+Heavy)/Light	(Medium+Heavy)/Light Count	(Medium+Heavy)/Light Variability [%]	q-Value	PEP	IonScore	Exp Value	Charge	MH+ [Da]	ΔM [ppm]	RT [min]	# Missed Cleavages
	High	LGVTANDVK	2	1	1	P40925		0	159845060				0	0.00377	46.01	0.000350855	2	916.51	0.336204	37.1242	0
	High	GEFVTTVQQR	2	1	1	P40925		0	52005148				0	0.001535	41.54	0.00137485	2	1164.6	2.15334	42.8542	0
	Medium	EKmDLTAK	2	1	1	P40925	M3(Oxidation)	0	1.0962e+07	0.43747	1		0.022	0.1065	21.69	0.145693	2	951.483	1.474	22.3986	1
	Medium	SQGAALDK	1	1	1	P40925		0	1.23313e+07				0.022	0.1009	15.85	0.564235	2	789.41	-0.62929	20.6657	0
	Medium	FVEGLPINDFSR	1	1	1	P40925		0	5.38182e+06	1.37656	1		0.031	0.1632	11.6	1.02391	2	1393.71	-0.178137	69.5331	0
	Medium	KLSSAmSAAK	1	1	1	P40925	M6(Oxidation)	0	1.39861e+07	0.185459	1		0.039	0.2173	25.09	0.0404213	2	1009.54	0.966613	22.0617	1
	Medium	LSSAmSAAK	1	1	1	P40925	M5(Oxidation)	0	7.29602e+06				0.04	0.2192	10.02	1.22933	2	881.44	0.275351	18.7098	0
P50993	Sodium/potassium-transporting ATPase subunit alpha-2 OS=Homo sapiens GN=ATP1A2 PE=1 SV=1 - [AT1A2_HUMAN]	134.513	11.27	4	3	10	11	85115970	0.736612	1		1020	112.193	5.65576
	A2	Sequence	# PSMs	# Proteins	# Protein Groups	Protein Group Accessions	Modifications	ΔCn	Area	(Medium+Heavy)/Light	(Medium+Heavy)/Light Count	(Medium+Heavy)/Light Variability [%]	q-Value	PEP	IonScore	Exp Value	Charge	MH+ [Da]	ΔM [ppm]	RT [min]	# Missed Cleavages
	High	QGAIVAVTGDGVNDSPALK	1	3	3	P05023;P50993;P13637		0	28699463				0	0.0001794	75.69	2.75169e-07	2	1811.95	-1.47915	56.649	0
	High	NmVPQQALVIR	1	4	3	P05023;P50993;P13637	M2(Oxidation)	0	44581258				0	0.001575	40.06	0.000986279	2	1284.71	0.238206	51.8776	0
	High	GGDRVPADLR	1	4	2	P50993;P13637		0	1.7809e+06				0	0.01128	26.04	0.0247641	3	1055.56	2.54228	40.5065	1
	High	VAEIPFNSTNK	1	4	2	P50993;P13637		0	50537100				0	0.00315	24.89	0.0454075	2	1219.63	0.484177	48.9689	0
	High	VImVTGDHPITAK	1	6	3	P50993;P13637;P05023	M3(Oxidation)	0	8.59915e+06				0	0.008139	10.28	1.1532	3	1397.74	-0.563442	46.2018	0
	High	GIVIATGDR	1	1	1	P50993		0	6.5688e+06	0.736612	1		0.003	0.05283	31.77	0.0103117	2	901.509	-1.45712	41.8115	0
	High	AQDVLAR	1	1	1	P50993		0	14344976				0.007	0.06764	11.07	1.0552	2	772.432	0.604485	31.0984	0
	Medium	AAVPDAVGK	1	3	3	P05023;P50993;P13637		0	160229552				0.012	0.07419	31.53	0.00829625	2	827.462	-0.142083	32.9724	0
	Medium	LNIPmSQVNPR	2	1	1	P50993	M5(Oxidation)	0	4.04272e+06				0.017	0.08328	12.95	0.590644	2	1284.68	3.76411	46.7569	0
	Medium	VDNSSLTGESEPQTR	1	4	3	P05023;P50993;P13637		0	35180061				0.026	0.1304	12.74	0.449631	2	1619.75	-0.842138	35.0923	0
P08107	Heat shock 70 kDa protein 1A/1B OS=Homo sapiens GN=HSPA1A PE=1 SV=5 - [HSP71_HUMAN]	131.513	7.8	4	2	5	7	7.19023e+07	0.241871	2	31.2183	641	70.009	5.65576
	A2	Sequence	# PSMs	# Proteins	# Protein Groups	Protein Group Accessions	Modifications	ΔCn	Area	(Medium+Heavy)/Light	(Medium+Heavy)/Light Count	(Medium+Heavy)/Light Variability [%]	q-Value	PEP	IonScore	Exp Value	Charge	MH+ [Da]	ΔM [ppm]	RT [min]	# Missed Cleavages
	High	VEIIANDQGNR	2	7	3	P08107;P11142;P11021		0	130614544				0	0.002348	65.19	4.01066e-06	2	1228.63	0.693903	38.5489	0
	High	TTPSYVAFTDTER	1	6	2	P08107;P11142		0	67162147				0	0.0002161	62.45	5.09123e-06	2	1487.7	0.102382	55.4448	0
	High	DAGVIAGLNVLR	2	2	1	P08107		0	4.82178e+06	0.196904	1		0.003	0.05358	16.3	0.13831	2	1197.7	3.70643	70.0826	0
	Medium	NSTIPTK	1	2	1	P08107		0	1.79303e+07	0.297108	1		0.014	0.07575	17.89	0.369	2	760.419	-0.644523	24.7657	0
	Medium	ITITNDK	1	5	2	P08107;P11142		0	15986495				0.026	0.1301	35.9	0.00691436	2	804.446	-0.426281	30.8701	0
P68366	Tubulin alpha-4A chain OS=Homo sapiens GN=TUBA4A PE=1 SV=1 - [TBA4A_HUMAN]	131.186	12.95	2	1	7	9	9.22186e+07				448	49.8924	5.05908
	A2	Sequence	# PSMs	# Proteins	# Protein Groups	Protein Group Accessions	Modifications	ΔCn	Area	(Medium+Heavy)/Light	(Medium+Heavy)/Light Count	(Medium+Heavy)/Light Variability [%]	q-Value	PEP	IonScore	Exp Value	Charge	MH+ [Da]	ΔM [ppm]	RT [min]	# Missed Cleavages
	High	EDAANNYAR	1	7	3	Q9BQE3;P68366;Q9NY65		0	116737908				0	0.002622	69.71	4.65039e-07	2	1023.45	0.567942	25.1227	0
	High	DVNAAIAAIK	2	1	1	P68366		0	97046842				0	0.001879	39.99	0.00078681	2	985.568	0.375923	54.8811	0
	High	EDMAALEK	1	4	2	Q9BQE3;P68366		0	1.88009e+07				0	0.01499	10.13	0.732735	2	906.425	1.05791	38.0643	0
	High	IHFPLATYAPVISAEK	2	6	2	Q9BQE3;P68366		0	0				0.002	0.03541	16.19	0.161092	3	1756.97	1.52264	82.7797	0
	High	LSVDYGKK	1	5	2	Q9BQE3;P68366		0	1.89149e+07				0.003	0.03607	28.92	0.0172473	2	909.504	0.239388	35.4501	1
	Medium	FDLmYAk	1	8	3	Q9BQE3;P68366;Q9NY65	M4(Oxidation); C-Term(Label:18O(1))	0	36960213				0.016	0.08143	23.27	0.0435654	2	905.433	1.22145	51.2467	0
	Medium	LSVDYGk	1	5	2	Q9BQE3;P68366	C-Term(Label:18O(2))	0	6.2871e+07				0.035	0.191	10.66	1.31859	2	785.418	0.267257	37.7434	0
Q16143	Beta-synuclein OS=Homo sapiens GN=SNCB PE=1 SV=1 - [SYUB_HUMAN]	130.82	29.85	1	1	4	5	60899927				134	14.279	4.41162
	A2	Sequence	# PSMs	# Proteins	# Protein Groups	Protein Group Accessions	Modifications	ΔCn	Area	(Medium+Heavy)/Light	(Medium+Heavy)/Light Count	(Medium+Heavy)/Light Variability [%]	q-Value	PEP	IonScore	Exp Value	Charge	MH+ [Da]	ΔM [ppm]	RT [min]	# Missed Cleavages
	High	QGVTEAAEK	1	2	2	Q16143;O76070		0	39529738				0	0.0005297	52.2	8.19481e-05	2	932.469	0.490455	23.0042	0
	High	EGVVAAAEK	1	2	2	P37840;Q16143		0	106285148				0	0.003247	46.33	0.00029916	2	873.468	0.229856	30.015	0
	High	EGVVQGVASVAEK	2	1	1	Q16143		0	20756180				0	0.0008562	41.26	0.000965139	2	1272.68	-0.471991	51.7088	0
	Medium	EGVLYVGSK	1	2	2	P37840;Q16143		0	36884895				0.014	0.07617	29.19	0.018196	2	951.517	2.1417	44.7095	0
P55809	Succinyl-CoA:3-ketoacid coenzyme A transferase 1, mitochondrial OS=Homo sapiens GN=OXCT1 PE=1 SV=1 - [SCOT1_HUMAN]	120.41	9.04	1	5	5	6	2.32391e+07	0.444139	4	9.94727	520	56.1219	7.45947
	A2	Sequence	# PSMs	# Proteins	# Protein Groups	Protein Group Accessions	Modifications	ΔCn	Area	(Medium+Heavy)/Light	(Medium+Heavy)/Light Count	(Medium+Heavy)/Light Variability [%]	q-Value	PEP	IonScore	Exp Value	Charge	MH+ [Da]	ΔM [ppm]	RT [min]	# Missed Cleavages
	High	GmGGAmDLVSSAK	2	1	1	P55809	M2(Oxidation); M6(Oxidation)	0	4.34948e+07	0.427653	1		0	0.0002972	62.65	4.40033e-06	2	1255.57	0.236019	36.8357	0
	High	AGNVIFR	1	1	1	P55809		0	1.81929e+07	0.285872	1		0	0.02191	26.53	0.0534706	2	776.442	0.237776	44.8681	0
	High	DGSVAIASKPR	1	1	1	P55809		0	8.02961e+06	0.461261	1		0	0.006013	16.18	0.249425	2	1100.61	0.639358	31.2557	0
	High	AVFDVDK	1	1	1	P55809		0	6.54921e+06	0.488905	1		0.003	0.04703	23.17	0.119523	2	793.409	-0.444027	43.0969	0
	Medium	SAKPGDDVR	1	1	1	P55809		0	3.03493e+06				0.031	0.1629	18.97	0.121061	2	944.479	-0.236727	21.5373	0
P09104	Gamma-enolase OS=Homo sapiens GN=ENO2 PE=1 SV=3 - [ENOG_HUMAN]	120.085	7.83	2	2	3	4	2.74602e+07	0.64546	2	34.647	434	47.239	5.03369
	A2	Sequence	# PSMs	# Proteins	# Protein Groups	Protein Group Accessions	Modifications	ΔCn	Area	(Medium+Heavy)/Light	(Medium+Heavy)/Light Count	(Medium+Heavy)/Light Variability [%]	q-Value	PEP	IonScore	Exp Value	Charge	MH+ [Da]	ΔM [ppm]	RT [min]	# Missed Cleavages
	High	IEEELGDEAR	2	1	1	P09104		0	66495250	0.514329	1		0	0.0004171	54.44	3.03988e-05	2	1160.54	0.504419	38.4312	0
	High	AAVPSGASTGIYEALELR	1	3	2	P06733;P09104		0	4.22763e+06				0	0.00198	40.74	0.000990918	2	1804.94	-0.148545	73.7665	0
	Medium	YNQLmR	1	2	1	P09104	M5(Oxidation)	0	11657676	0.810023	1		0.022	0.09888	41.79	0.000708572	2	840.404	0.544765	28.1682	0
P09471	Guanine nucleotide-binding protein G(o) subunit alpha OS=Homo sapiens GN=GNAO1 PE=1 SV=4 - [GNAO_HUMAN]	119.955	12.15	12	4	4	6	54487006				354	40.0249	5.52881
	A2	Sequence	# PSMs	# Proteins	# Protein Groups	Protein Group Accessions	Modifications	ΔCn	Area	(Medium+Heavy)/Light	(Medium+Heavy)/Light Count	(Medium+Heavy)/Light Variability [%]	q-Value	PEP	IonScore	Exp Value	Charge	MH+ [Da]	ΔM [ppm]	RT [min]	# Missed Cleavages
	High	LLLLGAGESGK	3	12	1	P09471		0	96271544				0	0.0004066	76.46	1.6042e-07	2	1057.63	1.07701	59.9167	0
	High	IGAADYQPTEQDILR	1	1	1	P09471		0	31573916				0	0.006882	30.82	0.00931435	2	1689.84	-0.0150428	59.325	0
	High	EYQLNDSAK	1	1	1	P09471		0	35615558				0	0.02265	20.96	0.0585225	2	1067.5	-0.112001	34.0783	0
	Medium	LFDVGGQr	1	1	1	P09471	C-Term(Label:18O(1))	0	5239741				0.039	0.2129	12.85	1.13098	2	893.473	0.198757	47.693	0
P11021	78 kDa glucose-regulated protein OS=Homo sapiens GN=HSPA5 PE=1 SV=2 - [GRP78_HUMAN]	119.74	10.24	2	6	7	8	7.45589e+07	0.214025	1		654	72.2884	5.16064
	A2	Sequence	# PSMs	# Proteins	# Protein Groups	Protein Group Accessions	Modifications	ΔCn	Area	(Medium+Heavy)/Light	(Medium+Heavy)/Light Count	(Medium+Heavy)/Light Variability [%]	q-Value	PEP	IonScore	Exp Value	Charge	MH+ [Da]	ΔM [ppm]	RT [min]	# Missed Cleavages
	High	VEIIANDQGNR	2	7	3	P08107;P11142;P11021		0	130614544				0	0.002348	65.19	4.01066e-06	2	1228.63	0.693903	38.5489	0
	High	ITITNDQNR	1	1	1	P11021		0	6.21293e+07				0	0.005944	37.15	0.00309368	2	1074.56	1.39048	32.4187	0
	High	ITPSYVAFTPEGER	1	1	1	P11021		0	5297203				0	0.02552	10.82	1.1053	2	1566.78	-0.43969	59.9673	0
	High	SQIFSTASDNQPTVTIK	1	1	1	P11021		0	1.50327e+07				0.003	0.04599	42.01	0.000749112	2	1836.94	1.94575	57.4648	0
	High	LTPEEIER	1	2	1	P11021		0	30932856				0.003	0.0503	17.36	0.263543	2	986.517	1.3156	41.5131	0
	Medium	NTVVPTKK	1	1	1	P11021		0	5.69195e+06				0.022	0.1032	14.97	0.32638	2	886.535	-0.745099	25.5866	1
	Medium	NTVVPTK	1	1	1	P11021		0	3.6137e+06	0.214025	1		0.03	0.1606	11.47	1.20472	2	758.441	0.496199	27.3097	0
P38646	Stress-70 protein, mitochondrial OS=Homo sapiens GN=HSPA9 PE=1 SV=2 - [GRP75_HUMAN]	118.75	4.42	1	2	3	4	9.16336e+07				679	73.6348	6.16357
	A2	Sequence	# PSMs	# Proteins	# Protein Groups	Protein Group Accessions	Modifications	ΔCn	Area	(Medium+Heavy)/Light	(Medium+Heavy)/Light Count	(Medium+Heavy)/Light Variability [%]	q-Value	PEP	IonScore	Exp Value	Charge	MH+ [Da]	ΔM [ppm]	RT [min]	# Missed Cleavages
	High	TTPSVVAFTADGER	1	1	1	P38646		0	1.41065e+07				0	0.0005428	42.52	0.000772465	2	1450.72	0.344475	56.2726	0
	High	NTTIPTK	2	3	2	P11142;P38646		0	214266588				0.003	0.04023	44.61	0.000759337	2	774.435	-0.192265	27.2366	0
	Medium	VLENAEGAR	1	1	1	P38646		0	46527889				0.026	0.1339	64.99	3.16957e-06	2	958.497	1.39628	28.4321	0
P17174	Aspartate aminotransferase, cytoplasmic OS=Homo sapiens GN=GOT1 PE=1 SV=3 - [AATC_HUMAN]	117.855	10.41	1	4	4	4	1.99655e+07	0.496149	2	19.1609	413	46.2185	7.00537
	A2	Sequence	# PSMs	# Proteins	# Protein Groups	Protein Group Accessions	Modifications	ΔCn	Area	(Medium+Heavy)/Light	(Medium+Heavy)/Light Count	(Medium+Heavy)/Light Variability [%]	q-Value	PEP	IonScore	Exp Value	Charge	MH+ [Da]	ΔM [ppm]	RT [min]	# Missed Cleavages
	High	LALGDDSPALK	1	1	1	P17174		0	1.75133e+07				0	0.00483	76.63	2.48774e-07	2	1099.6	0.760299	51.6916	0
	High	INVSGLTTK	1	1	1	P17174		0	21679478	0.563943	1		0	0.004304	48.26	0.000220187	2	932.542	0.811133	44.8987	0
	High	VGNLTVVGK	1	1	1	P17174		0	2.07039e+07	0.436506	1		0	0.002114	40.56	0.000896603	2	886.536	-0.0679106	41.5469	0
	Medium	VGGVQSLGGTGALR	1	1	1	P17174		0	5623674				0.023	0.1174	14.32	0.490022	2	1271.7	-3.25473	49.7948	0
P10809	60 kDa heat shock protein, mitochondrial OS=Homo sapiens GN=HSPD1 PE=1 SV=2 - [CH60_HUMAN]	116.49	12.39	1	6	6	9	5.58405e+07	1.59624	1		573	61.0164	5.87158
	A2	Sequence	# PSMs	# Proteins	# Protein Groups	Protein Group Accessions	Modifications	ΔCn	Area	(Medium+Heavy)/Light	(Medium+Heavy)/Light Count	(Medium+Heavy)/Light Variability [%]	q-Value	PEP	IonScore	Exp Value	Charge	MH+ [Da]	ΔM [ppm]	RT [min]	# Missed Cleavages
	High	VTDALNATR	1	1	1	P10809		0	107338846				0	0.002413	43.12	0.000809297	2	960.512	0.615201	33.8829	0
	High	NAGVEGSLIVEK	2	1	1	P10809		0	1.9761e+07				0	0.002741	37.51	0.00251935	2	1215.66	0.39778	49.5062	0
	High	GANPVEIR	1	1	1	P10809		0	9.09415e+06				0	0.01183	32.98	0.00679726	2	855.468	0.105308	37.5656	0
	High	VGEVIVTK	2	1	1	P10809		0	40421604				0	0.01262	25.87	0.023941	2	844.513	-0.998461	37.3786	0
	High	LVQDVANNTNEEAGDGTTTATVLAR	1	1	1	P10809		0	11899673	1.59624	1		0	0.002679	16.28	0.196647	3	2560.25	-0.389618	53.1359	0
	High	LSDGVAVLK	2	1	1	P10809		0	1.84281e+07				0.003	0.04869	34.81	0.00345236	2	901.535	-0.0392452	48.3976	0
Q05639	Elongation factor 1-alpha 2 OS=Homo sapiens GN=EEF1A2 PE=1 SV=1 - [EF1A2_HUMAN]	114.293	5.83	3	3	3	5	5.92151e+07	0.594583	1		463	50.4383	9.02686
	A2	Sequence	# PSMs	# Proteins	# Protein Groups	Protein Group Accessions	Modifications	ΔCn	Area	(Medium+Heavy)/Light	(Medium+Heavy)/Light Count	(Medium+Heavy)/Light Variability [%]	q-Value	PEP	IonScore	Exp Value	Charge	MH+ [Da]	ΔM [ppm]	RT [min]	# Missed Cleavages
	High	IGGIGTVPVGR	2	3	1	Q05639		0	7.96562e+07				0	0.0006195	62.37	3.12891e-06	2	1025.61	-0.589465	50.7869	0
	High	QTVAVGVIK	2	3	1	Q05639		0	9.13917e+07				0	0.02207	26.28	0.013306	2	914.567	0.413393	45.1066	0
	High	KLEDNPK	1	1	1	Q05639		0	6597246	0.594583	1		0.003	0.03958	37.95	0.00249305	2	843.457	-0.0266181	20.8759	1
Q16352	Alpha-internexin OS=Homo sapiens GN=INA PE=1 SV=2 - [AINX_HUMAN]	113.513	9.22	1	5	5	7	2.40271e+07	0.646735	2	92.972	499	55.3574	5.40186
	A2	Sequence	# PSMs	# Proteins	# Protein Groups	Protein Group Accessions	Modifications	ΔCn	Area	(Medium+Heavy)/Light	(Medium+Heavy)/Light Count	(Medium+Heavy)/Light Variability [%]	q-Value	PEP	IonScore	Exp Value	Charge	MH+ [Da]	ΔM [ppm]	RT [min]	# Missed Cleavages
	High	LSGAGGAGGFR	2	1	1	Q16352		0	21262125				0	0.001539	50.9	0.000155251	2	949.487	1.63095	36.2761	0
	High	AQLEEASSAR	1	1	1	Q16352		0	31920756	1.10134	1		0	0.01751	44.25	0.000449126	2	1061.52	1.18113	28.6617	0
	High	ILSATTSK	1	1	1	Q16352		0	1.88985e+07	0.379779	1		0	0.01203	36.08	0.00340313	2	820.477	-0.850842	28.3637	0
	High	FANLNEQAAR	1	1	1	Q16352		0	1.64466e+07				0	0.004899	25.06	0.0405456	2	1133.57	2.71026	40.0663	0
	Medium	VGELFQR	2	1	1	Q16352		0	9.1074e+06				0.012	0.0721	21.62	0.179394	2	848.462	-0.947337	47.4584	0
P61764	Syntaxin-binding protein 1 OS=Homo sapiens GN=STXBP1 PE=1 SV=1 - [STXB1_HUMAN]	113.1	5.22	1	3	3	4	4.86002e+07	0.936816	2	58.7761	594	67.5259	6.96143
	A2	Sequence	# PSMs	# Proteins	# Protein Groups	Protein Group Accessions	Modifications	ΔCn	Area	(Medium+Heavy)/Light	(Medium+Heavy)/Light Count	(Medium+Heavy)/Light Variability [%]	q-Value	PEP	IonScore	Exp Value	Charge	MH+ [Da]	ΔM [ppm]	RT [min]	# Missed Cleavages
	High	SSASFSTTAVSAR	1	1	1	P61764		0	94167752				0	0.0003368	51.89	9.18943e-05	2	1271.62	0.0447954	41.5745	0
	High	ISEQTYQLSR	1	1	1	P61764		0	6175380	1.35277	1		0	0.0002663	39.67	0.00162921	2	1224.62	1.25703	42.0381	0
	High	SQLLILDR	2	1	1	P61764		0	45457559	0.648763	1		0.001	0.02745	35.79	0.00202998	2	957.573	0.573869	61.1035	0
Q08209	Serine/threonine-protein phosphatase 2B catalytic subunit alpha isoform OS=Homo sapiens GN=PPP3CA PE=1 SV=1 - [PP2BA_HUMAN]	112.303	9.98	3	5	5	6	4.22076e+07	0.561964	2	36.865	521	58.6503	5.85889
	A2	Sequence	# PSMs	# Proteins	# Protein Groups	Protein Group Accessions	Modifications	ΔCn	Area	(Medium+Heavy)/Light	(Medium+Heavy)/Light Count	(Medium+Heavy)/Light Variability [%]	q-Value	PEP	IonScore	Exp Value	Charge	MH+ [Da]	ΔM [ppm]	RT [min]	# Missed Cleavages
	High	GLTPTGmLPSGVLSGGK	1	1	1	Q08209	M7(Oxidation)	0	34802611				0	0.005701	56.26	2.62617e-05	2	1587.84	-0.264799	61.5246	0
	High	YENNVmNIR	1	3	1	Q08209	M6(Oxidation)	0	21803808	0.714948	1		0	0.003117	35.56	0.00239055	2	1168.54	1.54574	36.1239	0
	High	EESESVLTLK	1	2	1	Q08209		0	8.01989e+06				0	0.003285	32.96	0.0083714	2	1134.59	-2.04114	50.7127	0
	High	LEESVALR	2	1	1	Q08209		0	42788836				0.003	0.03731	21.38	0.101889	2	916.509	-0.86251	42.4784	0
	High	ITSFEEAK	1	1	1	Q08209		0	49031303	0.441715	1		0.004	0.05576	25.62	0.0398899	2	924.467	-0.592624	36.7756	0
P19367	Hexokinase-1 OS=Homo sapiens GN=HK1 PE=1 SV=3 - [HXK1_HUMAN]	106.791	8.29	2	8	8	10	2.82684e+07	0.610322	5	19.9303	917	102.42	6.80029
	A2	Sequence	# PSMs	# Proteins	# Protein Groups	Protein Group Accessions	Modifications	ΔCn	Area	(Medium+Heavy)/Light	(Medium+Heavy)/Light Count	(Medium+Heavy)/Light Variability [%]	q-Value	PEP	IonScore	Exp Value	Charge	MH+ [Da]	ΔM [ppm]	RT [min]	# Missed Cleavages
	High	GAAmVTAVAYR	1	2	1	P19367	M4(Oxidation)	0	19786394				0	0.002002	48.93	0.000223892	2	1125.57	0.238984	41.9006	0
	High	LVDEYSLNAGK	1	1	1	P19367		0	1.43103e+07				0	0.006491	38.39	0.00219489	2	1208.62	0.992588	47.4863	0
	High	DFNPTATVK	1	1	1	P19367		0	50708504	0.521489	1		0	0.009273	26.49	0.037585	2	992.505	0.211733	43.8891	0
	High	FLLSESGSGK	1	1	1	P19367		0	1.1922e+07	0.545363	1		0.001	0.03424	18.52	0.173647	2	1024.53	-0.0682382	48.2855	0
	High	TTVGVDGSLYK	1	1	1	P19367		0	3.66312e+06	0.903462	1		0.001	0.03118	18.5	0.199168	2	1139.6	2.43261	46.7822	0
	High	ITPELLTR	2	1	1	P19367		0	1.33001e+07	0.610322	1		0.003	0.03853	33.8	0.00314736	2	942.562	0.491419	53.1335	0
	High	EGLLFEGR	1	1	1	P19367		0	2.67478e+06	0.697224	1		0.003	0.05298	17.52	0.346941	2	920.483	-0.698014	58.2138	0
	Medium	SIPDGSEK	2	1	1	P19367		0	1.34454e+07				0.025	0.1284	11.34	0.594956	2	832.402	-2.73776	23.8087	0
P00338	L-lactate dehydrogenase A chain OS=Homo sapiens GN=LDHA PE=1 SV=2 - [LDHA_HUMAN]	104.639	10.24	2	3	4	5	82788531				332	36.6654	8.26514
	A2	Sequence	# PSMs	# Proteins	# Protein Groups	Protein Group Accessions	Modifications	ΔCn	Area	(Medium+Heavy)/Light	(Medium+Heavy)/Light Count	(Medium+Heavy)/Light Variability [%]	q-Value	PEP	IonScore	Exp Value	Charge	MH+ [Da]	ΔM [ppm]	RT [min]	# Missed Cleavages
	High	VTLTSEEEAR	1	1	1	P00338		0	59752822				0	0.005209	43.87	0.000600949	2	1134.56	-0.209013	36.5279	0
	High	DYNVTANSK	1	1	1	P00338		0	1.13626e+07				0	0.01738	30.64	0.00966536	2	1011.48	1.66724	29.2216	0
	High	LVIITAGAR	2	1	1	P00338		0	19089835				0.001	0.03055	32.98	0.00153568	2	913.583	0.214739	52.2212	0
	Medium	LNLVQR	1	3	2	P07195;P00338		0	169522936				0.017	0.08445	29.34	0.00942942	2	742.457	0.310663	40.505	0
P21281	V-type proton ATPase subunit B, brain isoform OS=Homo sapiens GN=ATP6V1B2 PE=1 SV=3 - [VATB2_HUMAN]	101.69	9.78	2	5	5	6	71978071	0.416994	1		511	56.4649	5.80811
	A2	Sequence	# PSMs	# Proteins	# Protein Groups	Protein Group Accessions	Modifications	ΔCn	Area	(Medium+Heavy)/Light	(Medium+Heavy)/Light Count	(Medium+Heavy)/Light Variability [%]	q-Value	PEP	IonScore	Exp Value	Charge	MH+ [Da]	ΔM [ppm]	RT [min]	# Missed Cleavages
	High	AVVQVFEGTSGIDAK	1	1	1	P21281		0	1.75014e+07				0	0.0005693	48.53	0.000186574	2	1520.8	1.20304	60.359	0
	High	SGQVLEVSGSK	1	1	1	P21281		0	68004712				0	0.000448	38.49	0.00247056	2	1090.57	0.531086	35.8684	0
	High	EQALAVSR	2	1	1	P21281		0	108070636				0.001	0.03347	23.27	0.0659368	2	873.477	-2.13395	32.5998	0
	High	SAIGEGmTR	1	2	1	P21281	M7(Oxidation)	0	1.47264e+07				0.003	0.04932	35.88	0.00269846	2	937.442	1.00564	24.9291	0
	Medium	NYLSQPR	1	1	1	P21281		0	39858865	0.416994	1		0.022	0.09601	14.84	0.615179	2	877.455	2.18257	35.9759	0
P07900	Heat shock protein HSP 90-alpha OS=Homo sapiens GN=HSP90AA1 PE=1 SV=5 - [HS90A_HUMAN]	100.672	9.15	4	4	7	10	6.1264e+07	0.881423	3	13.5715	732	84.6067	5.021
	A2	Sequence	# PSMs	# Proteins	# Protein Groups	Protein Group Accessions	Modifications	ΔCn	Area	(Medium+Heavy)/Light	(Medium+Heavy)/Light Count	(Medium+Heavy)/Light Variability [%]	q-Value	PEP	IonScore	Exp Value	Charge	MH+ [Da]	ΔM [ppm]	RT [min]	# Missed Cleavages
	High	TDTGEPmGR	3	1	1	P07900	M7(Oxidation)	0	24391027				0	0.02617	33.23	0.00104574	2	979.415	0.279214	18.3705	0
	High	DQVANSAFVER	1	1	1	P07900		0	51073800	0.881423	1		0	0.002116	29.51	0.0128176	2	1235.6	-0.248796	42.4996	0
	High	EDQTEYLEER	1	4	2	P07900;P08238		0	2.89216e+06				0	0.00492	27.71	0.00643848	2	1311.57	1.60707	41.4967	0
	High	DNSTmGYmAAK	1	1	1	P07900	M5(Oxidation); M8(Oxidation)	0	1.57974e+07	0.965513	1		0	0.002635	26.6	0.00218258	2	1220.49	-0.221502	24.8358	0
	High	TLVSVTK	1	2	1	P07900		0	108327228	0.345703	1		0.005	0.06306	34.95	0.00655773	2	747.461	-0.495467	36.7245	0
	Medium	TLTIVDTGIGmTK	1	3	2	P08238;P07900	M11(Oxidation)	0	1.7476e+07				0.012	0.06982	14.23	0.447423	2	1365.73	3.45027	57.767	0
	Medium	LSELLR	2	3	2	P07900;P08238		0	1.50445e+07				0.022	0.1077	35.93	0.00454381	2	730.446	0.482247	45.3806	0
P16520	Guanine nucleotide-binding protein G(I)/G(S)/G(T) subunit beta-3 OS=Homo sapiens GN=GNB3 PE=1 SV=1 - [GBB3_HUMAN]	99.759	2.94	4	1	1	2	246519296				340	37.1969	5.66846
	A2	Sequence	# PSMs	# Proteins	# Protein Groups	Protein Group Accessions	Modifications	ΔCn	Area	(Medium+Heavy)/Light	(Medium+Heavy)/Light Count	(Medium+Heavy)/Light Variability [%]	q-Value	PEP	IonScore	Exp Value	Charge	MH+ [Da]	ΔM [ppm]	RT [min]	# Missed Cleavages
	High	LLVSASQDGK	2	4	1	P16520		0	246519296				0	0.003634	78.24	2.22703e-07	2	1017.56	0.17151	37.1658	0
Q03252	Lamin-B2 OS=Homo sapiens GN=LMNB2 PE=1 SV=3 - [LMNB2_HUMAN]	99.4918	7	3	4	4	5	3.1116e+07	0.168844	2	48.6199	600	67.6475	5.35107
	A2	Sequence	# PSMs	# Proteins	# Protein Groups	Protein Group Accessions	Modifications	ΔCn	Area	(Medium+Heavy)/Light	(Medium+Heavy)/Light Count	(Medium+Heavy)/Light Variability [%]	q-Value	PEP	IonScore	Exp Value	Charge	MH+ [Da]	ΔM [ppm]	RT [min]	# Missed Cleavages
	High	ATSSSSGSLSATGR	2	1	1	Q03252		0	4.13758e+07				0	0.002094	59.97	1.14287e-05	2	1268.61	0.64386	26.7716	0
	High	LLEGEEER	1	3	1	Q03252		0	18031446	0.230367	1		0	0.01773	40.11	0.00106761	2	974.478	-0.544031	33.2041	0
	High	AGGPATPLSPTR	1	1	1	Q03252		0	31999530				0	0.001156	27.57	0.0244104	2	1124.61	-0.134101	39.3326	0
	Medium	LSPSPSSR	1	2	1	Q03252		0	1.99728e+07	0.123751	1		0.026	0.1305	28.22	0.0204899	2	830.436	-0.8063	24.8326	0
Q16720	Plasma membrane calcium-transporting ATPase 3 OS=Homo sapiens GN=ATP2B3 PE=1 SV=3 - [AT2B3_HUMAN]	97.3	2.87	4	3	3	3	2.99487e+07	1.74949	1		1220	134.112	5.61768
	A2	Sequence	# PSMs	# Proteins	# Protein Groups	Protein Group Accessions	Modifications	ΔCn	Area	(Medium+Heavy)/Light	(Medium+Heavy)/Light Count	(Medium+Heavy)/Light Variability [%]	q-Value	PEP	IonScore	Exp Value	Charge	MH+ [Da]	ΔM [ppm]	RT [min]	# Missed Cleavages
	High	mVTGDNINTAR	1	4	1	Q16720	M1(Oxidation)	0	59965254	1.74949	1		0	0.0005407	74.29	3.96597e-07	2	1207.57	0.530028	31.5313	0
	High	QVVAVTGDGTNDGPALK	1	4	1	Q16720		0	1.97005e+07				0	0.00466	39.01	0.00141303	2	1641.84	-2.10945	47.4879	0
	Medium	SmSTVIR	1	2	1	Q16720	M2(Oxidation)	0	1.01805e+07				0.044	0.2398	13.18	0.867915	2	809.418	-0.879671	27.2777	0
P37840	Alpha-synuclein OS=Homo sapiens GN=SNCA PE=1 SV=1 - [SYUA_HUMAN]	94.04	19.29	1	1	3	4	5.55521e+07	0.174693	2	56.2023	140	14.4512	4.70361
	A2	Sequence	# PSMs	# Proteins	# Protein Groups	Protein Group Accessions	Modifications	ΔCn	Area	(Medium+Heavy)/Light	(Medium+Heavy)/Light Count	(Medium+Heavy)/Light Variability [%]	q-Value	PEP	IonScore	Exp Value	Charge	MH+ [Da]	ΔM [ppm]	RT [min]	# Missed Cleavages
	High	EGVVAAAEK	1	2	2	P37840;Q16143		0	106285148				0	0.003247	46.33	0.00029916	2	873.468	0.229856	30.015	0
	High	QGVAEAAGK	2	1	1	P37840		0	23486193	0.174693	2	56.2023	0	0.01623	34.21	0.00515868	2	830.437	-0.0954059	21.1379	0
	Medium	EGVLYVGSK	1	2	2	P37840;Q16143		0	36884895				0.014	0.07617	29.19	0.018196	2	951.517	2.1417	44.7095	0
Q9UQM7	Calcium/calmodulin-dependent protein kinase type II subunit alpha OS=Homo sapiens GN=CAMK2A PE=1 SV=2 - [KCC2A_HUMAN]	93	7.53	2	3	4	6	2.23135e+08	0.858584	2	2.26432	478	54.0535	7.07861
	A2	Sequence	# PSMs	# Proteins	# Protein Groups	Protein Group Accessions	Modifications	ΔCn	Area	(Medium+Heavy)/Light	(Medium+Heavy)/Light Count	(Medium+Heavy)/Light Variability [%]	q-Value	PEP	IonScore	Exp Value	Charge	MH+ [Da]	ΔM [ppm]	RT [min]	# Missed Cleavages
	High	GAILTTmLATR	2	3	2	Q9UQM7;Q13554	M7(Oxidation)	0	100227276				0	0.0009728	45.33	0.000461616	2	1163.65	0.60791	53.1	0
	High	mLTINPSK	1	1	1	Q9UQM7	M1(Oxidation)	0	147356080	0.871796	1		0	0.008824	35.81	0.00396257	2	919.492	0.698107	37.9713	0
	High	SGAPSVLPH	2	1	1	Q9UQM7		0	421822792				0.001	0.02916	36.78	0.00506894	2	864.458	0.0865223	42.3763	0
	Medium	ITAAEALk	1	1	1	Q9UQM7	C-Term(Label:18O(1))	0	23643980	0.845572	1		0.012	0.07394	19.53	0.164916	2	818.487	-0.116514	39.2417	0
P20336	Ras-related protein Rab-3A OS=Homo sapiens GN=RAB3A PE=1 SV=1 - [RAB3A_HUMAN]	90.3672	15	4	3	3	3	1.65184e+07	1.1507	3	7.28907	220	24.9681	5.03369
	A2	Sequence	# PSMs	# Proteins	# Protein Groups	Protein Group Accessions	Modifications	ΔCn	Area	(Medium+Heavy)/Light	(Medium+Heavy)/Light Count	(Medium+Heavy)/Light Variability [%]	q-Value	PEP	IonScore	Exp Value	Charge	MH+ [Da]	ΔM [ppm]	RT [min]	# Missed Cleavages
	High	mSESLDTADPAVTGAK	1	1	1	P20336	M1(Oxidation)	0	2.15564e+07	1.1507	1		0	0.0001868	60.19	7.60969e-06	2	1608.74	-0.304264	42.7921	0
	High	ILIIGNSSVGK	1	4	1	P20336		0	1.74521e+07	0.896936	1		0	0.003822	39.04	0.000673587	2	1100.67	1.07698	56.0978	0
	Medium	TSFLFR	1	4	1	P20336		0	1.05468e+07	1.20861	1		0.022	0.1047	25.36	0.0243045	2	770.421	1.61297	60.6952	0
P60174	Triosephosphate isomerase OS=Homo sapiens GN=TPI1 PE=1 SV=3 - [TPIS_HUMAN]	89.55	13.64	1	4	4	6	73858699	0.3207	2	113.491	286	30.7717	5.92236
	A2	Sequence	# PSMs	# Proteins	# Protein Groups	Protein Group Accessions	Modifications	ΔCn	Area	(Medium+Heavy)/Light	(Medium+Heavy)/Light Count	(Medium+Heavy)/Light Variability [%]	q-Value	PEP	IonScore	Exp Value	Charge	MH+ [Da]	ΔM [ppm]	RT [min]	# Missed Cleavages
	High	SNVSDAVAQSTR	2	1	1	P60174		0	81996393				0	0.0003547	57.51	2.32419e-05	2	1234.6	0.749806	35.7536	0
	High	TATPQQAQEVHEK	1	1	1	P60174		0	27175452	0.173621	1		0	0.003452	10.95	1.16913	3	1466.72	-0.0402212	27.904	0
	High	VVFEQTK	2	1	1	P60174		0	112404252				0.001	0.03212	17.08	0.466205	2	850.468	1.47677	34.6529	0
	Medium	VIADNVK	1	1	1	P60174		0	21591168	0.592376	1		0.028	0.154	23.47	0.0753381	2	758.441	0.0806418	28.1208	0
Q92752	Tenascin-R OS=Homo sapiens GN=TNR PE=1 SV=3 - [TENR_HUMAN]	88.6367	1.55	1	3	3	4	1.43342e+07	0.803668	1		1358	149.467	4.81787
	A2	Sequence	# PSMs	# Proteins	# Protein Groups	Protein Group Accessions	Modifications	ΔCn	Area	(Medium+Heavy)/Light	(Medium+Heavy)/Light Count	(Medium+Heavy)/Light Variability [%]	q-Value	PEP	IonScore	Exp Value	Charge	MH+ [Da]	ΔM [ppm]	RT [min]	# Missed Cleavages
	High	TELDSPR	2	1	1	Q92752		0	24777143				0	0.0217	44.43	0.000438103	2	817.404	-1.02629	28.3031	0
	High	FSVEDSR	1	1	1	Q92752		0	7646550	0.803668	1		0.003	0.05092	52.27	4.98057e-05	2	839.39	0.339218	35.4256	0
	Medium	GIGPTTR	1	1	1	Q92752		0	1.0579e+07				0.037	0.2037	18.51	0.181798	2	701.394	-0.189341	28.2475	0
P35080	Profilin-2 OS=Homo sapiens GN=PFN2 PE=1 SV=3 - [PROF2_HUMAN]	88.2529	15.71	1	2	2	3	69784636	0.464166	1		140	15.0363	6.99072
	A2	Sequence	# PSMs	# Proteins	# Protein Groups	Protein Group Accessions	Modifications	ΔCn	Area	(Medium+Heavy)/Light	(Medium+Heavy)/Light Count	(Medium+Heavy)/Light Variability [%]	q-Value	PEP	IonScore	Exp Value	Charge	MH+ [Da]	ΔM [ppm]	RT [min]	# Missed Cleavages
	High	SQGGEPTYNVAVGR	1	1	1	P35080		0	83031350				0	1.831e-05	77.05	2.70222e-07	2	1434.7	-0.630544	43.0646	0
	High	VLVFVmGK	2	1	1	P35080	M6(Oxidation)	0	56537922	0.464166	1		0.003	0.04443	29.87	0.00556409	2	908.527	0.00669645	54.9025	0
P00403	Cytochrome c oxidase subunit 2 OS=Homo sapiens GN=MT-CO2 PE=1 SV=1 - [COX2_HUMAN]	87.8211	10.57	1	3	3	4	4.79044e+07	0.455166	2	0.0111929	227	25.5482	4.81787
	A2	Sequence	# PSMs	# Proteins	# Protein Groups	Protein Group Accessions	Modifications	ΔCn	Area	(Medium+Heavy)/Light	(Medium+Heavy)/Light Count	(Medium+Heavy)/Light Variability [%]	q-Value	PEP	IonScore	Exp Value	Charge	MH+ [Da]	ΔM [ppm]	RT [min]	# Missed Cleavages
	High	TDAIPGR	1	1	1	P00403		0	50432385	0.455132	1		0	0.01068	40.34	0.00103104	2	729.389	0.590351	29.3145	0
	High	LLDVDNR	2	1	1	P00403		0	51647850	0.455201	1		0.002	0.03569	35.83	0.00368315	2	844.452	-0.400697	39.8649	0
	High	VVLPIEAPIR	1	1	1	P00403		0	41632936				0.002	0.03496	33.61	0.00043448	2	1106.69	1.11531	67.331	0
P07339	Cathepsin D OS=Homo sapiens GN=CTSD PE=1 SV=1 - [CATD_HUMAN]	87.111	10.92	1	4	4	5	6.43034e+07	1.41223	1		412	44.5236	6.53662
	A2	Sequence	# PSMs	# Proteins	# Protein Groups	Protein Group Accessions	Modifications	ΔCn	Area	(Medium+Heavy)/Light	(Medium+Heavy)/Light Count	(Medium+Heavy)/Light Variability [%]	q-Value	PEP	IonScore	Exp Value	Charge	MH+ [Da]	ΔM [ppm]	RT [min]	# Missed Cleavages
	High	VGFAEAAR	2	1	1	P07339		0	151969996				0	0.0182	46.95	0.000463215	2	820.432	0.482537	38.4976	0
	High	VSTLPAITLK	1	1	1	P07339		0	1.17429e+07				0	0.002323	26.47	0.00619916	2	1042.65	0.430964	61.9555	0
	High	DPDAQPGGELmLGGTDSK	1	1	1	P07339	M11(Oxidation)	0	918455	1.41223	1		0.001	0.0348	18.36	0.0743995	2	1803.81	0.0909155	48.1965	0
	High	LSPEDYTLK	1	1	1	P07339		0	2.91972e+07				0.003	0.04735	30.99	0.0154455	2	1065.55	-0.562533	51.1985	0
P43243	Matrin-3 OS=Homo sapiens GN=MATR3 PE=1 SV=2 - [MATR3_HUMAN]	86.06	3.66	1	3	3	4	2.30461e+07	0.11889	2	117.458	847	94.5648	6.25244
	A2	Sequence	# PSMs	# Proteins	# Protein Groups	Protein Group Accessions	Modifications	ΔCn	Area	(Medium+Heavy)/Light	(Medium+Heavy)/Light Count	(Medium+Heavy)/Light Variability [%]	q-Value	PEP	IonScore	Exp Value	Charge	MH+ [Da]	ΔM [ppm]	RT [min]	# Missed Cleavages
	High	GNLGAGNGNLQGPR	1	1	1	P43243		0	1.17661e+07				0	0.000245	70.14	1.35075e-06	2	1324.67	-0.116944	37.7037	0
	High	SFQQSSLSR	1	1	1	P43243		0	23451820	0.222787	1		0	0.01731	18.69	0.179826	2	1039.52	0.0384136	35.2609	0
	High	GPGPLQER	2	1	1	P43243		0	3.39204e+07	0.0634451	1		0.003	0.04944	23.52	0.0689178	2	853.455	2.2088	32.8821	0
P12532	Creatine kinase U-type, mitochondrial OS=Homo sapiens GN=CKMT1A PE=1 SV=1 - [KCRU_HUMAN]	84.4994	6	2	3	3	4	2.83152e+07	0.574743	2	144.106	417	47.0072	8.33838
	A2	Sequence	# PSMs	# Proteins	# Protein Groups	Protein Group Accessions	Modifications	ΔCn	Area	(Medium+Heavy)/Light	(Medium+Heavy)/Light Count	(Medium+Heavy)/Light Variability [%]	q-Value	PEP	IonScore	Exp Value	Charge	MH+ [Da]	ΔM [ppm]	RT [min]	# Missed Cleavages
	High	VVVDALSGLK	1	1	1	P12532		0	2.63873e+07				0	0.007651	47.07	0.000137435	2	1000.6	0.758028	59.2301	0
	High	HTTDLDASK	2	2	1	P12532		0	2.2365e+07	0.574743	2	144.106	0.003	0.0454	30.09	0.0103336	2	987.473	-0.774734	23.2444	0
	Medium	YVLSSR	1	1	1	P12532		0	36193173				0.026	0.1353	29.09	0.0146123	2	724.399	0.280391	34.1806	0
P02042	Hemoglobin subunit delta OS=Homo sapiens GN=HBD PE=1 SV=2 - [HBD_HUMAN]	83.9967	22.45	1	1	3	7	2.13145e+07				147	16.0453	8.04541
	A2	Sequence	# PSMs	# Proteins	# Protein Groups	Protein Group Accessions	Modifications	ΔCn	Area	(Medium+Heavy)/Light	(Medium+Heavy)/Light Count	(Medium+Heavy)/Light Variability [%]	q-Value	PEP	IonScore	Exp Value	Charge	MH+ [Da]	ΔM [ppm]	RT [min]	# Missed Cleavages
	High	VHLTPEEK	5	2	2	P68871;P02042		0	37737374				0	0.02671	31.36	0.0109671	2	952.51	0.462152	33.8363	0
	High	VNVDAVGGEALGR	1	1	1	P02042		0	4.89168e+06				0	0.02698	15.23	0.397389	2	1256.66	1.10841	50.6926	0
	High	VVAGVANALAHK	1	2	2	P68871;P02042		0	0				0	0.01408	10.11	0.589869	3	1149.67	-1.30763	49.3462	0
Q99798	Aconitate hydratase, mitochondrial OS=Homo sapiens GN=ACO2 PE=1 SV=2 - [ACON_HUMAN]	83.7633	4.74	1	3	3	3	2.70452e+07	0.488797	2	7.18444	780	85.3719	7.60596
	A2	Sequence	# PSMs	# Proteins	# Protein Groups	Protein Group Accessions	Modifications	ΔCn	Area	(Medium+Heavy)/Light	(Medium+Heavy)/Light Count	(Medium+Heavy)/Light Variability [%]	q-Value	PEP	IonScore	Exp Value	Charge	MH+ [Da]	ΔM [ppm]	RT [min]	# Missed Cleavages
	High	NAVTQEFGPVPDTAR	1	1	1	Q99798		0	1.72946e+07	0.513034	1		0	0.0003725	62.72	5.96039e-06	2	1601.79	-2.26977	55.8635	0
	High	NTIVTSYNR	1	1	1	Q99798		0	5.37236e+07				0	0.01505	35.06	0.00436645	2	1067.55	-0.80049	37.4999	0
	High	SQFTITPGSEQIR	1	1	1	Q99798		0	1.01173e+07	0.465704	1		0.008	0.06844	16.65	0.343872	2	1463.75	0.00523719	54.9925	0
Q05193	Dynamin-1 OS=Homo sapiens GN=DNM1 PE=1 SV=2 - [DYN1_HUMAN]	83.66	8.22	3	9	9	10	4.16597e+07	0.420342	4	32.3558	864	97.347	7.1665
	A2	Sequence	# PSMs	# Proteins	# Protein Groups	Protein Group Accessions	Modifications	ΔCn	Area	(Medium+Heavy)/Light	(Medium+Heavy)/Light Count	(Medium+Heavy)/Light Variability [%]	q-Value	PEP	IonScore	Exp Value	Charge	MH+ [Da]	ΔM [ppm]	RT [min]	# Missed Cleavages
	High	DITAALAAER	1	1	1	Q05193		0	5.64367e+06				0	0.004545	38.44	0.00210532	2	1030.55	0.0899945	53.1633	0
	High	SPTSSPTPQR	1	1	1	Q05193		0	22581114	0.241226	1		0	0.0117	32.96	0.00622164	2	1057.53	2.16288	23.195	0
	High	RSPTSSPTPQR	2	1	1	Q05193		0	8.1473e+06				0	0.009209	22.78	0.060895	3	1213.62	-4.75232	24.9823	1
	High	GISPVPINLR	1	2	1	Q05193		0	24220996				0.001	0.03287	24.73	0.013124	2	1065.64	1.68616	62.177	0
	High	EVDPQGQR	1	1	1	Q05193		0	5.34008e+07				0.003	0.0423	20.16	0.0915638	2	928.448	0.0210258	21.0318	0
	Medium	AGVYPER	1	1	1	Q05193		0	28762143				0.023	0.1183	10.43	1.75712	2	791.404	-0.708825	30.4278	0
	Medium	SSVLENFVGR	1	3	1	Q05193		0	7.54071e+06	0.575371	1		0.023	0.1204	10	1.73	2	1107.58	2.79325	63.0264	0
	Medium	GYIGVVNR	1	2	1	Q05193		0	1.6708e+07	0.375914	1		0.032	0.1747	13.12	1.14082	2	877.486	-3.68655	43.4277	0
	Medium	TIGVITK	1	3	1	Q05193		0	42816093	0.47002	1		0.037	0.2017	24.73	0.0543466	2	731.467	0.545525	38.4821	0
P06744	Glucose-6-phosphate isomerase OS=Homo sapiens GN=GPI PE=1 SV=4 - [G6PI_HUMAN]	80.94	7.35	2	5	5	5	5.18115e+07	0.532011	4	90.4616	558	63.1072	8.32373
	A2	Sequence	# PSMs	# Proteins	# Protein Groups	Protein Group Accessions	Modifications	ΔCn	Area	(Medium+Heavy)/Light	(Medium+Heavy)/Light Count	(Medium+Heavy)/Light Variability [%]	q-Value	PEP	IonScore	Exp Value	Charge	MH+ [Da]	ΔM [ppm]	RT [min]	# Missed Cleavages
	High	SNTPILVDGK	1	1	1	P06744		0	49788514	0.345317	1		0	0.009628	40.28	0.000965689	2	1043.57	0.435712	42.808	0
	High	SPEDLER	1	2	1	P06744		0	63646000	0.288808	1		0	0.01597	31.35	0.00589924	2	845.4	-0.325879	29.542	0
	High	DVmPEVNK	1	1	1	P06744	M3(Oxidation)	0	13853298	1.10561	1		0	0.02321	21.43	0.0535989	2	947.451	0.244643	28.0381	0
	High	NLVTEDVmR	1	1	1	P06744	M8(Oxidation)	0	30370094	0.81964	1		0.001	0.03297	28.27	0.0250213	2	1092.54	0.560202	42.4085	0
	High	INYTEGR	1	1	1	P06744		0	41999934				0.003	0.04039	31.61	0.0103536	2	852.42	-1.46047	30.6382	0
Q13449	Limbic system-associated membrane protein OS=Homo sapiens GN=LSAMP PE=1 SV=2 - [LSAMP_HUMAN]	79.9907	5.62	1	2	2	2	2.50984e+07	0.416574	2	43.7329	338	37.3702	6.97607
	A2	Sequence	# PSMs	# Proteins	# Protein Groups	Protein Group Accessions	Modifications	ΔCn	Area	(Medium+Heavy)/Light	(Medium+Heavy)/Light Count	(Medium+Heavy)/Light Variability [%]	q-Value	PEP	IonScore	Exp Value	Charge	MH+ [Da]	ΔM [ppm]	RT [min]	# Missed Cleavages
	High	AANEVSSADVK	1	1	1	Q13449		0	3.00393e+07	0.552377	1		0	0.000182	54.04	5.68019e-05	2	1090.54	1.65325	29.2317	0
	High	QGDTAILR	1	1	1	Q13449		0	2.01576e+07	0.314158	1		0	0.002136	46.49	0.000361265	2	873.479	-0.247294	37.2079	0
P10636	Microtubule-associated protein tau OS=Homo sapiens GN=MAPT PE=1 SV=5 - [TAU_HUMAN]	79.36	10.03	1	8	8	14	5.80928e+07	0.259438	3	22.0801	758	78.8798	6.7124
	A2	Sequence	# PSMs	# Proteins	# Protein Groups	Protein Group Accessions	Modifications	ΔCn	Area	(Medium+Heavy)/Light	(Medium+Heavy)/Light Count	(Medium+Heavy)/Light Variability [%]	q-Value	PEP	IonScore	Exp Value	Charge	MH+ [Da]	ΔM [ppm]	RT [min]	# Missed Cleavages
	High	SPVVSGDTSPR	2	1	1	P10636		0	5.09324e+07	0.381201	1		0	0.005045	37.81	0.0020366	2	1101.55	-0.458612	30.7399	0
	High	LQTAPVPmPDLK	3	1	1	P10636	M8(Oxidation)	0	6.86949e+07				0	0.009099	36.9	0.00249092	2	1325.71	0.552628	52.0193	0
	High	TPPSSGEPPK	4	1	1	P10636		0	1.07426e+07				0	0.01699	18.48	0.21144	2	996.501	1.38876	23.1208	0
	High	TPSLPTPPTR	1	1	1	P10636		0	6.38222e+06				0.001	0.03047	17.22	0.235192	2	1066.59	-0.364324	46.9945	0
	Medium	LDLSNVQSK	1	1	1	P10636		0	1.253e+07	0.223935	1		0.012	0.07161	13.35	0.899331	2	1003.54	-1.49417	41.3269	0
	Medium	TPPKSPSSAK	1	1	1	P10636		0	828647				0.028	0.1561	11.43	0.866936	2	999.547	0.185523	19.1087	1
	Medium	VQIINK	1	1	1	P10636		0	17740791	0.259438	1		0.031	0.1652	17.56	0.157849	2	714.451	0.131616	33.4598	0
	Medium	IGSTENLK	1	1	1	P10636		0	54651168				0.036	0.1973	16.49	0.442045	2	861.468	0.114573	30.1762	0
P06733	Alpha-enolase OS=Homo sapiens GN=ENO1 PE=1 SV=2 - [ENOA_HUMAN]	78.5909	12.44	1	4	5	5	1.3297e+08				434	47.1393	7.38623
	A2	Sequence	# PSMs	# Proteins	# Protein Groups	Protein Group Accessions	Modifications	ΔCn	Area	(Medium+Heavy)/Light	(Medium+Heavy)/Light Count	(Medium+Heavy)/Light Variability [%]	q-Value	PEP	IonScore	Exp Value	Charge	MH+ [Da]	ΔM [ppm]	RT [min]	# Missed Cleavages
	High	IEEELGSK	1	1	1	P06733		0	154779392				0	0.01466	52.35	9.48828e-05	2	904.462	-0.0503041	31.7104	0
	High	AAVPSGASTGIYEALELR	1	3	2	P06733;P09104		0	4.22763e+06				0	0.00198	40.74	0.000990918	2	1804.94	-0.148545	73.7665	0
	High	GNPTVEVDLFTSK	1	1	1	P06733		0	1.96609e+07				0	0.01773	23.15	0.0680262	2	1406.72	0.161342	64.6123	0
	High	TIAPALVSK	1	1	1	P06733		0	214754964				0	0.01334	13.19	0.227873	2	899.56	3.92038	45.5425	0
	High	YNQLLR	1	1	1	P06733		0	2.93747e+07				0.004	0.05734	30.16	0.0303606	2	806.454	2.97719	41.4806	0
Q9NY65	Tubulin alpha-8 chain OS=Homo sapiens GN=TUBA8 PE=1 SV=1 - [TBA8_HUMAN]	78.3633	5.79	2	1	3	3	5.25983e+07				449	50.0616	5.05908
	A2	Sequence	# PSMs	# Proteins	# Protein Groups	Protein Group Accessions	Modifications	ΔCn	Area	(Medium+Heavy)/Light	(Medium+Heavy)/Light Count	(Medium+Heavy)/Light Variability [%]	q-Value	PEP	IonScore	Exp Value	Charge	MH+ [Da]	ΔM [ppm]	RT [min]	# Missed Cleavages
	High	EDAANNYAR	1	7	3	Q9BQE3;P68366;Q9NY65		0	116737908				0	0.002622	69.71	4.65039e-07	2	1023.45	0.567942	25.1227	0
	High	DVNVAIAAIK	1	1	1	Q9NY65		0	4.09683e+06				0	0.02217	18.05	0.101839	2	1013.6	-0.285965	57.2677	0
	Medium	FDLmYAk	1	8	3	Q9BQE3;P68366;Q9NY65	M4(Oxidation); C-Term(Label:18O(1))	0	36960213				0.016	0.08143	23.27	0.0435654	2	905.433	1.22145	51.2467	0
P08238	Heat shock protein HSP 90-beta OS=Homo sapiens GN=HSP90AB1 PE=1 SV=4 - [HS90B_HUMAN]	77.3192	6.91	5	2	5	6	2.12615e+07	0.428995	1		724	83.2121	5.03369
	A2	Sequence	# PSMs	# Proteins	# Protein Groups	Protein Group Accessions	Modifications	ΔCn	Area	(Medium+Heavy)/Light	(Medium+Heavy)/Light Count	(Medium+Heavy)/Light Variability [%]	q-Value	PEP	IonScore	Exp Value	Charge	MH+ [Da]	ΔM [ppm]	RT [min]	# Missed Cleavages
	High	EQVANSAFVER	1	2	1	P08238		0	31263898	0.428995	1		0	0.0002195	45.29	0.000422996	2	1249.62	-0.266011	42.2523	0
	High	EDQTEYLEER	1	4	2	P07900;P08238		0	2.89216e+06				0	0.00492	27.71	0.00643848	2	1311.57	1.60707	41.4967	0
	High	SIYYITGESK	1	2	1	P08238		0	5.30691e+06				0.003	0.05215	17.14	0.300421	2	1160.58	0.753771	50.5377	0
	Medium	TLTLVDTGIGmTK	1	3	2	P08238;P07900	M11(Oxidation)	0	1.7476e+07				0.012	0.06982	14.23	0.447423	2	1365.73	3.45027	57.767	0
	Medium	LSELLR	2	3	2	P07900;P08238		0	1.50445e+07				0.022	0.1077	35.93	0.00454381	2	730.446	0.482247	45.3806	0
P23528	Cofilin-1 OS=Homo sapiens GN=CFL1 PE=1 SV=3 - [COF1_HUMAN]	76.06	20.48	2	4	4	7	3.66905e+07				166	18.4907	8.08936
	A2	Sequence	# PSMs	# Proteins	# Protein Groups	Protein Group Accessions	Modifications	ΔCn	Area	(Medium+Heavy)/Light	(Medium+Heavy)/Light Count	(Medium+Heavy)/Light Variability [%]	q-Value	PEP	IonScore	Exp Value	Charge	MH+ [Da]	ΔM [ppm]	RT [min]	# Missed Cleavages
	High	YALYDATYETK	1	2	1	P23528		0	2.37048e+07				0	0.02157	35.32	0.00306984	2	1337.63	1.02841	53.2191	0
	High	SSTPEEVK	2	1	1	P23528		0	4.52376e+07				0	0.02241	24.93	0.0384032	2	876.431	-0.122735	22.0746	0
	High	LGGSAVISLEGKPL	1	1	1	P23528		0	4.11292e+07				0	0.002045	12.13	0.300052	2	1340.78	0.924376	66.8869	0
	High	KSSTPEEVK	3	1	1	P23528		0	1.14012e+07				0.004	0.05524	34.79	0.00562561	2	1004.53	1.2911	22.5416	1
O60641	Clathrin coat assembly protein AP180 OS=Homo sapiens GN=SNAP91 PE=1 SV=2 - [AP180_HUMAN]	75.8767	2.54	1	2	2	3	1.54697e+07				907	92.444	4.85596
	A2	Sequence	# PSMs	# Proteins	# Protein Groups	Protein Group Accessions	Modifications	ΔCn	Area	(Medium+Heavy)/Light	(Medium+Heavy)/Light Count	(Medium+Heavy)/Light Variability [%]	q-Value	PEP	IonScore	Exp Value	Charge	MH+ [Da]	ΔM [ppm]	RT [min]	# Missed Cleavages
	High	IAAAQYSVTGSAVAR	2	1	1	O60641		0	2.58601e+07				0	0.000252	56.11	3.15929e-05	2	1464.78	-1.09439	47.5779	0
	High	QmAFDFAR	1	1	1	O60641	M2(Oxidation)	0	5.0793e+06				0	0.009326	22.1	0.0336044	2	1001.45	1.26893	51.7854	0
P30049	ATP synthase subunit delta, mitochondrial OS=Homo sapiens GN=ATP5D PE=1 SV=2 - [ATPD_HUMAN]	72.9035	17.26	2	3	3	4	47708401	0.251473	1		168	17.4792	5.49072
	A2	Sequence	# PSMs	# Proteins	# Protein Groups	Protein Group Accessions	Modifications	ΔCn	Area	(Medium+Heavy)/Light	(Medium+Heavy)/Light Count	(Medium+Heavy)/Light Variability [%]	q-Value	PEP	IonScore	Exp Value	Charge	MH+ [Da]	ΔM [ppm]	RT [min]	# Missed Cleavages
	High	AQAELVGTADEATR	1	1	1	P30049		0	35228252				0	0.001045	47.79	0.00021957	2	1431.71	0.223489	42.5588	0
	High	IEANEALVK	1	1	1	P30049		0	79194970				0	0.002202	30.71	0.0102326	2	986.552	-0.0587491	41.0454	0
	Medium	AEIQIR	2	2	1	P30049		0	28701981	0.251473	1		0.032	0.1779	31.35	0.0108824	2	729.426	0.502469	37.4038	0
Q00610	Clathrin heavy chain 1 OS=Homo sapiens GN=CLTC PE=1 SV=5 - [CLH1_HUMAN]	72.8567	1.73	1	3	3	3	2.13126e+07	0.345835	1		1675	191.493	5.69385
	A2	Sequence	# PSMs	# Proteins	# Protein Groups	Protein Group Accessions	Modifications	ΔCn	Area	(Medium+Heavy)/Light	(Medium+Heavy)/Light Count	(Medium+Heavy)/Light Variability [%]	q-Value	PEP	IonScore	Exp Value	Charge	MH+ [Da]	ΔM [ppm]	RT [min]	# Missed Cleavages
	High	IYIDSNNNPER	1	1	1	Q00610		0	34565405				0	0.004156	56.16	2.61471e-05	2	1334.64	1.21242	39.4766	0
	High	LLYNNVSNFGR	1	1	1	Q00610		0	7.62063e+06				0.001	0.02832	26.42	0.0287323	2	1296.67	1.07563	58.1372	0
	Medium	AVNYFSK	1	1	1	Q00610		0	21751877	0.345835	1		0.022	0.1004	27.61	0.0218459	2	828.425	-0.0928792	41.5259	0
P07197	Neurofilament medium polypeptide OS=Homo sapiens GN=NEFM PE=1 SV=3 - [NFM_HUMAN]	71.7995	4.04	1	4	4	5	51342372	0.751278	2	142.693	916	102.411	4.90674
	A2	Sequence	# PSMs	# Proteins	# Protein Groups	Protein Group Accessions	Modifications	ΔCn	Area	(Medium+Heavy)/Light	(Medium+Heavy)/Light Count	(Medium+Heavy)/Light Variability [%]	q-Value	PEP	IonScore	Exp Value	Charge	MH+ [Da]	ΔM [ppm]	RT [min]	# Missed Cleavages
	High	QLSDIEER	1	1	1	P07197		0	37108776	0.369064	1		0	0.01671	38.04	0.00197866	2	989.489	-0.746844	36.6331	0
	High	GSPSTVSSSYK	1	1	1	P07197		0	7391516	1.52933	1		0	0.0006515	31.92	0.00604126	2	1099.53	1.47749	29.3895	0
	High	VSGSPSSGFR	2	1	1	P07197		0	109526824				0	0.01134	31.31	0.00828358	2	980.479	-0.280087	33.2983	0
	Medium	SIELESVR	1	1	1	P07197		0	2.33962e+06				0.036	0.1985	25.25	0.0520949	2	932.505	-0.101908	47.3074	0
Q9Y2J2	Band 4.1-like protein 3 OS=Homo sapiens GN=EPB41L3 PE=1 SV=2 - [E41L3_HUMAN]	68.45	2.21	1	2	2	2	5.53482e+06				1087	120.603	5.18604
	A2	Sequence	# PSMs	# Proteins	# Protein Groups	Protein Group Accessions	Modifications	ΔCn	Area	(Medium+Heavy)/Light	(Medium+Heavy)/Light Count	(Medium+Heavy)/Light Variability [%]	q-Value	PEP	IonScore	Exp Value	Charge	MH+ [Da]	ΔM [ppm]	RT [min]	# Missed Cleavages
	High	VVQETVLVEER	1	1	1	Q9Y2J2		0	2.16709e+06				0	0.003603	46.75	0.000202895	2	1300.71	1.47825	49.1128	0
	High	AVLEQEETAAASR	1	1	1	Q9Y2J2		0	8.90254e+06				0	0.0007059	36.7	0.00285418	2	1374.69	-0.0440939	40.4707	0
P00558	Phosphoglycerate kinase 1 OS=Homo sapiens GN=PGK1 PE=1 SV=3 - [PGK1_HUMAN]	65.47	5.76	1	3	3	4	3.51597e+07	0.379249	1		417	44.5861	8.104
	A2	Sequence	# PSMs	# Proteins	# Protein Groups	Protein Group Accessions	Modifications	ΔCn	Area	(Medium+Heavy)/Light	(Medium+Heavy)/Light Count	(Medium+Heavy)/Light Variability [%]	q-Value	PEP	IonScore	Exp Value	Charge	MH+ [Da]	ΔM [ppm]	RT [min]	# Missed Cleavages
	High	YAEAVTR	2	1	1	P00558		0	72064704	0.379249	1		0.003	0.04045	44.68	0.000490188	2	809.413	-2.88098	27.9225	0
	High	NNQITNNQR	1	1	1	P00558		0	2.09368e+06				0.007	0.06669	19.82	0.128205	2	1101.54	0.782152	20.8629	0
	Medium	ALmDEVVK	1	1	1	P00558	M3(Oxidation)	0	31320702				0.035	0.1904	22.19	0.105389	2	920.477	1.20478	37.1146	0
P61158	Actin-related protein 3 OS=Homo sapiens GN=ACTR3 PE=1 SV=3 - [ARP3_HUMAN]	65.04	2.15	2	1	1	1	1.75768e+07				418	47.341	5.88428
	A2	Sequence	# PSMs	# Proteins	# Protein Groups	Protein Group Accessions	Modifications	ΔCn	Area	(Medium+Heavy)/Light	(Medium+Heavy)/Light Count	(Medium+Heavy)/Light Variability [%]	q-Value	PEP	IonScore	Exp Value	Charge	MH+ [Da]	ΔM [ppm]	RT [min]	# Missed Cleavages
	High	LSEELSGGR	1	2	1	P61158		0	1.75768e+07				0	0.003334	65.04	5.26392e-06	2	947.478	-1.03666	34.0799	0
Q8NFW8	N-acylneuraminate cytidylyltransferase OS=Homo sapiens GN=CMAS PE=1 SV=2 - [NEUA_HUMAN]	65	2.3	1	1	1	1	2.47864e+07				434	48.3487	7.92822
	A2	Sequence	# PSMs	# Proteins	# Protein Groups	Protein Group Accessions	Modifications	ΔCn	Area	(Medium+Heavy)/Light	(Medium+Heavy)/Light Count	(Medium+Heavy)/Light Variability [%]	q-Value	PEP	IonScore	Exp Value	Charge	MH+ [Da]	ΔM [ppm]	RT [min]	# Missed Cleavages
	High	GAATSVSNPR	1	1	1	Q8NFW8		0	2.47864e+07				0	0.001986	65	4.61693e-06	2	959.49	-0.577913	24.5073	0
P38606	V-type proton ATPase catalytic subunit A OS=Homo sapiens GN=ATP6V1A PE=1 SV=2 - [VATA_HUMAN]	64.54	5.35	1	3	3	4	73318959	0.308596	2	139.511	617	68.2605	5.51611
	A2	Sequence	# PSMs	# Proteins	# Protein Groups	Protein Group Accessions	Modifications	ΔCn	Area	(Medium+Heavy)/Light	(Medium+Heavy)/Light Count	(Medium+Heavy)/Light Variability [%]	q-Value	PEP	IonScore	Exp Value	Charge	MH+ [Da]	ΔM [ppm]	RT [min]	# Missed Cleavages
	High	TALVANTSNmPVAAR	1	1	1	P38606	M10(Oxidation)	0	117690310				0	0.002417	44.05	0.000535228	2	1531.79	1.47114	41.0783	0
	High	GVNVSALSR	2	1	1	P38606		0	68092180	0.153071	1		0	0.007722	28.69	0.0212951	2	902.507	1.99272	43.178	0
	High	TVISQSLSK	1	1	1	P38606		0	34174387	0.622141	1		0	0.01932	14.79	0.421506	2	962.552	0.0239739	40.3098	0
P62820	Ras-related protein Rab-1A OS=Homo sapiens GN=RAB1A PE=1 SV=3 - [RAB1A_HUMAN]	64.28	9.27	1	2	2	2	1.68252e+07	0.473154	2	12.2059	205	22.6634	6.21436
	A2	Sequence	# PSMs	# Proteins	# Protein Groups	Protein Group Accessions	Modifications	ΔCn	Area	(Medium+Heavy)/Light	(Medium+Heavy)/Light Count	(Medium+Heavy)/Light Variability [%]	q-Value	PEP	IonScore	Exp Value	Charge	MH+ [Da]	ΔM [ppm]	RT [min]	# Missed Cleavages
	High	mGPGATAGGAEK	1	1	1	P62820	M1(Oxidation)	0	1.38764e+07	0.435894	1		0	0.002249	64.28	2.51944e-06	2	1062.49	0.972482	20.5941	0
	Medium	TIELDGK	1	1	1	P62820		0	1.97741e+07	0.5136	1		0.029	0.1588	16.45	0.484634	2	775.419	-0.3768	36.5247	0
P09622	Dihydrolipoyl dehydrogenase, mitochondrial OS=Homo sapiens GN=DLD PE=1 SV=2 - [DLDH_HUMAN]	63.16	5.7	1	3	3	4	2.73345e+07	0.342859	2	89.3181	509	54.143	7.85498
	A2	Sequence	# PSMs	# Proteins	# Protein Groups	Protein Group Accessions	Modifications	ΔCn	Area	(Medium+Heavy)/Light	(Medium+Heavy)/Light Count	(Medium+Heavy)/Light Variability [%]	q-Value	PEP	IonScore	Exp Value	Charge	MH+ [Da]	ΔM [ppm]	RT [min]	# Missed Cleavages
	High	ADGGTQVIDTK	1	1	1	P09622		0	39502719	0.574722	1		0	0.0003663	47.86	0.000206239	2	1104.55	0.725521	31.7745	0
	High	GIEmSEVR	1	1	1	P09622	M4(Oxidation)	0	3.43322e+07				0	0.01864	34.3	0.00390112	2	936.446	0.170869	30.5133	0
	High	EANLAASFGK	2	1	1	P09622		0	8.16839e+06	0.204537	1		0	0.008496	11.57	1.39325	2	1007.52	1.07187	48.6232	0
Q8NCB2	CaM kinase-like vesicle-associated protein OS=Homo sapiens GN=CAMKV PE=2 SV=2 - [CAMKV_HUMAN]	62.94	3.59	1	2	2	4	1.0673e+07	0.685591	1		501	54.3202	5.5542
	A2	Sequence	# PSMs	# Proteins	# Protein Groups	Protein Group Accessions	Modifications	ΔCn	Area	(Medium+Heavy)/Light	(Medium+Heavy)/Light Count	(Medium+Heavy)/Light Variability [%]	q-Value	PEP	IonScore	Exp Value	Charge	MH+ [Da]	ΔM [ppm]	RT [min]	# Missed Cleavages
	High	SDNVAPADR	2	1	1	Q8NCB2		0	1.59406e+07	0.685591	1		0	0.01283	43.96	0.000261164	2	944.443	-0.0290454	22.6495	0
	Medium	SATPATDGR	2	1	1	Q8NCB2		0	5.40537e+06				0.022	0.1093	31.31	0.00743303	2	875.422	0.0916856	18.6694	0
P61604	10 kDa heat shock protein, mitochondrial OS=Homo sapiens GN=HSPE1 PE=1 SV=2 - [CH10_HUMAN]	62.68	21.57	1	2	2	3	3.02124e+07	0.130041	1		102	10.9249	8.92432
	A2	Sequence	# PSMs	# Proteins	# Protein Groups	Protein Group Accessions	Modifications	ΔCn	Area	(Medium+Heavy)/Light	(Medium+Heavy)/Light Count	(Medium+Heavy)/Light Variability [%]	q-Value	PEP	IonScore	Exp Value	Charge	MH+ [Da]	ΔM [ppm]	RT [min]	# Missed Cleavages
	High	VLQATVVAVGSGSK	2	1	1	P61604		0	4.10913e+07				0	0.00346	40.84	0.000729362	2	1315.75	-4.69895	48.4888	0
	Medium	SAAETVTK	1	1	1	P61604		0	1.93335e+07	0.130041	1		0.018	0.08714	22.86	0.093428	2	806.425	-0.452458	19.6037	0
Q9BY11	Protein kinase C and casein kinase substrate in neurons protein 1 OS=Homo sapiens GN=PACSIN1 PE=1 SV=1 - [PACN1_HUMAN]	62.0922	6.08	1	3	3	3	27574266	0.84523	1		444	50.9338	5.23682
	A2	Sequence	# PSMs	# Proteins	# Protein Groups	Protein Group Accessions	Modifications	ΔCn	Area	(Medium+Heavy)/Light	(Medium+Heavy)/Light Count	(Medium+Heavy)/Light Variability [%]	q-Value	PEP	IonScore	Exp Value	Charge	MH+ [Da]	ΔM [ppm]	RT [min]	# Missed Cleavages
	High	GADAQEDLR	1	1	1	Q9BY11		0	10716161	0.84523	1		0	0.001726	58.27	9.53191e-06	2	974.453	-1.29206	28.4626	0
	Medium	TEQSVTPEQQK	1	1	1	Q9BY11		0	25007188				0.014	0.07626	12.28	0.662549	2	1274.62	0.790284	24.8373	0
	Medium	VLEDVGK	1	1	1	Q9BY11		0	46999449				0.022	0.108	27.24	0.0355886	2	759.425	0.226515	31.7422	0
Q6NXT2	Histone H3.3C OS=Homo sapiens GN=H3F3C PE=1 SV=3 - [H3C_HUMAN]	61.55	9.63	5	2	2	4	3.24932e+07	0.307176	1		135	15.2044	11.1069
	A2	Sequence	# PSMs	# Proteins	# Protein Groups	Protein Group Accessions	Modifications	ΔCn	Area	(Medium+Heavy)/Light	(Medium+Heavy)/Light Count	(Medium+Heavy)/Light Variability [%]	q-Value	PEP	IonScore	Exp Value	Charge	MH+ [Da]	ΔM [ppm]	RT [min]	# Missed Cleavages
	High	STELLIR	3	5	1	Q6NXT2		0	4.7449e+07				0.004	0.05592	44.49	0.000554785	2	831.492	-1.20513	49.9288	0
	Medium	VTImPK	1	5	1	Q6NXT2	M4(Oxidation)	0	17537355	0.307176	1		0.046	0.248	28.41	0.0153585	2	704.402	1.30589	29.2625	0
P12036	Neurofilament heavy polypeptide OS=Homo sapiens GN=NEFH PE=1 SV=4 - [NFH_HUMAN]	61.09	2.05	1	2	2	2	1.26276e+07	0.341214	1		1026	112.411	6.17627
	A2	Sequence	# PSMs	# Proteins	# Protein Groups	Protein Group Accessions	Modifications	ΔCn	Area	(Medium+Heavy)/Light	(Medium+Heavy)/Light Count	(Medium+Heavy)/Light Variability [%]	q-Value	PEP	IonScore	Exp Value	Charge	MH+ [Da]	ΔM [ppm]	RT [min]	# Missed Cleavages
	High	FAQEAEAAR	1	1	1	P12036		0	7.8013e+06	0.341214	1		0	0.004419	51.37	8.42523e-05	2	992.478	-1.45523	30.0989	0
	High	TSVSSVSASPSR	1	1	1	P12036		0	1.74538e+07				0	0.002242	27.22	0.031675	2	1164.59	1.31586	30.5149	0
P61088	Ubiquitin-conjugating enzyme E2 N OS=Homo sapiens GN=UBE2N PE=1 SV=1 - [UBE2N_HUMAN]	60.9688	13.16	2	2	2	2	1.07267e+07				152	17.127	6.56592
	A2	Sequence	# PSMs	# Proteins	# Protein Groups	Protein Group Accessions	Modifications	ΔCn	Area	(Medium+Heavy)/Light	(Medium+Heavy)/Light Count	(Medium+Heavy)/Light Variability [%]	q-Value	PEP	IonScore	Exp Value	Charge	MH+ [Da]	ΔM [ppm]	RT [min]	# Missed Cleavages
	High	TNEAQAIETAR	1	2	1	P61088		0	2.04578e+07				0	0.002874	52.57	7.80224e-05	2	1203.6	0.423835	37.6028	0
	Medium	AEPDESNAR	1	2	1	P61088		0	995595				0.012	0.07327	27.65	0.00523962	2	988.433	0.319605	18.5143	0
P19338	Nucleolin OS=Homo sapiens GN=NCL PE=1 SV=3 - [NUCL_HUMAN]	60.6765	3.38	1	3	3	3	1.63222e+07	0.0709066	1		710	76.5684	4.70361
	A2	Sequence	# PSMs	# Proteins	# Protein Groups	Protein Group Accessions	Modifications	ΔCn	Area	(Medium+Heavy)/Light	(Medium+Heavy)/Light Count	(Medium+Heavy)/Light Variability [%]	q-Value	PEP	IonScore	Exp Value	Charge	MH+ [Da]	ΔM [ppm]	RT [min]	# Missed Cleavages
	High	QGTEIDGR	1	1	1	P19338		0	1.3941e+07				0	0.009629	46.43	0.00022751	2	875.422	-0.0477561	24.8463	0
	High	NDLAVVDVR	1	1	1	P19338		0	5.87159e+06	0.0709066	1		0.001	0.0286	23.02	0.0576212	2	1000.54	0.22561	50.7457	0
	Medium	LELQGPR	1	1	1	P19338		0	2.91541e+07				0.04	0.2212	29.9	0.0140191	2	812.463	0.438037	40.0345	0
Q99962	Endophilin-A1 OS=Homo sapiens GN=SH3GL2 PE=1 SV=1 - [SH3G2_HUMAN]	60.53	3.41	2	1	1	1	1.06469e+07				352	39.9371	5.45264
	A2	Sequence	# PSMs	# Proteins	# Protein Groups	Protein Group Accessions	Modifications	ΔCn	Area	(Medium+Heavy)/Light	(Medium+Heavy)/Light Count	(Medium+Heavy)/Light Variability [%]	q-Value	PEP	IonScore	Exp Value	Charge	MH+ [Da]	ΔM [ppm]	RT [min]	# Missed Cleavages
	High	TIEYLQPNPASR	1	2	1	Q99962		0	1.06469e+07				0	0.00167	60.53	1.13737e-05	2	1388.72	1.3655	50.691	0
Q14576	ELAV-like protein 3 OS=Homo sapiens GN=ELAVL3 PE=1 SV=3 - [ELAV3_HUMAN]	60.4367	8.17	3	3	3	4	1.14642e+07				367	39.5223	9.27588
	A2	Sequence	# PSMs	# Proteins	# Protein Groups	Protein Group Accessions	Modifications	ΔCn	Area	(Medium+Heavy)/Light	(Medium+Heavy)/Light Count	(Medium+Heavy)/Light Variability [%]	q-Value	PEP	IonScore	Exp Value	Charge	MH+ [Da]	ΔM [ppm]	RT [min]	# Missed Cleavages
	High	ILVDQVTGVSR	2	2	1	Q14576		0	1.71404e+07				0	0.008364	53.56	3.78877e-05	2	1186.68	2.10238	52.1133	0
	High	DANLYVSGLPK	1	3	1	Q14576		0	4.66051e+06				0.007	0.06758	16.05	0.487936	2	1176.63	3.78827	56.977	0
	Medium	FANNPSQK	1	3	1	Q14576		0	1.25917e+07				0.022	0.102	14.97	0.450564	2	905.449	1.24329	22.2799	0
P23246	Splicing factor, proline- and glutamine-rich OS=Homo sapiens GN=SFPQ PE=1 SV=2 - [SFPQ_HUMAN]	60.12	2.12	1	1	1	2	4.91676e+07	0.0753755	1		707	76.1016	9.43701
	A2	Sequence	# PSMs	# Proteins	# Protein Groups	Protein Group Accessions	Modifications	ΔCn	Area	(Medium+Heavy)/Light	(Medium+Heavy)/Light Count	(Medium+Heavy)/Light Variability [%]	q-Value	PEP	IonScore	Exp Value	Charge	MH+ [Da]	ΔM [ppm]	RT [min]	# Missed Cleavages
	High	FGQGGAGPVGGQGPR	2	1	1	P23246		0	4.91676e+07	0.0753755	1		0	0.003197	44.52	0.000441479	2	1341.66	-2.16137	38.7268	0
O76070	Gamma-synuclein OS=Homo sapiens GN=SNCG PE=1 SV=2 - [SYUG_HUMAN]	60.05	14.17	1	1	2	2	2.3829e+07				127	13.3228	4.85596
	A2	Sequence	# PSMs	# Proteins	# Protein Groups	Protein Group Accessions	Modifications	ΔCn	Area	(Medium+Heavy)/Light	(Medium+Heavy)/Light Count	(Medium+Heavy)/Light Variability [%]	q-Value	PEP	IonScore	Exp Value	Charge	MH+ [Da]	ΔM [ppm]	RT [min]	# Missed Cleavages
	High	QGVTEAAEK	1	2	2	Q16143;O76070		0	39529738				0	0.0005297	52.2	8.19481e-05	2	932.469	0.490455	23.0042	0
	High	EGVmYVGAK	1	1	1	O76070	M4(Oxidation)	0	8.1283e+06				0.007	0.06654	25.35	0.0287367	2	969.47	-0.997414	34.9852	0
P63027	Vesicle-associated membrane protein 2 OS=Homo sapiens GN=VAMP2 PE=1 SV=3 - [VAMP2_HUMAN]	59.47	28.45	2	2	2	2	2.00987e+07	1.0407	2	6.96457	116	12.6547	8.1333
	A2	Sequence	# PSMs	# Proteins	# Protein Groups	Protein Group Accessions	Modifications	ΔCn	Area	(Medium+Heavy)/Light	(Medium+Heavy)/Light Count	(Medium+Heavy)/Light Variability [%]	q-Value	PEP	IonScore	Exp Value	Charge	MH+ [Da]	ΔM [ppm]	RT [min]	# Missed Cleavages
	High	ADALQAGASQFETSAAK	1	2	1	P63027		0	35751172	0.992997	1		0	2.07e-05	58.32	1.83303e-05	2	1665.81	-0.605674	53.7982	0
	High	LQQTQAQVDEVVDImR	1	1	1	P63027	M15(Oxidation)	0	4.44626e+06	1.09069	1		0	0.01589	16.15	0.231741	3	1888.94	0.806326	56.8156	0
P31930	Cytochrome b-c1 complex subunit 1, mitochondrial OS=Homo sapiens GN=UQCRC1 PE=1 SV=3 - [QCR1_HUMAN]	59.01	2.08	1	1	1	1	1.56534e+07				480	52.6124	6.3667
	A2	Sequence	# PSMs	# Proteins	# Protein Groups	Protein Group Accessions	Modifications	ΔCn	Area	(Medium+Heavy)/Light	(Medium+Heavy)/Light Count	(Medium+Heavy)/Light Variability [%]	q-Value	PEP	IonScore	Exp Value	Charge	MH+ [Da]	ΔM [ppm]	RT [min]	# Missed Cleavages
	High	IAEVDASVVR	1	1	1	P31930		0	1.56534e+07				0	0.0014	59.01	1.92801e-05	2	1058.58	-0.42088	44.5802	0
P32119	Peroxiredoxin-2 OS=Homo sapiens GN=PRDX2 PE=1 SV=5 - [PRDX2_HUMAN]	58.69	18.18	1	3	4	6	8.22493e+07	0.3754	1		198	21.8782	5.97314
	A2	Sequence	# PSMs	# Proteins	# Protein Groups	Protein Group Accessions	Modifications	ΔCn	Area	(Medium+Heavy)/Light	(Medium+Heavy)/Light Count	(Medium+Heavy)/Light Variability [%]	q-Value	PEP	IonScore	Exp Value	Charge	MH+ [Da]	ΔM [ppm]	RT [min]	# Missed Cleavages
	High	QITVNDLPVGR	2	2	2	P32119;Q06830		0	76389213				0	0.001241	34.54	0.00348045	2	1211.68	1.64716	56.7002	0
	High	ATAVVDGAFK	1	1	1	P32119		0	93738384				0	0.009625	26.22	0.0466817	2	978.525	-0.594116	44.1506	0
	High	GLFIIDGK	1	1	1	P32119		0	2.12878e+07				0	0.01541	14.8	0.592725	2	862.504	0.226437	65.1037	0
	Medium	SVDEALR	2	1	1	P32119		0	76620380	0.3754	1		0.021	0.09462	19.62	0.236843	2	789.409	-0.93856	32.5457	0
Q00577	Transcriptional activator protein Pur-alpha OS=Homo sapiens GN=PURA PE=1 SV=2 - [PURA_HUMAN]	58.566	4.97	1	2	2	4	6.45626e+07	0.112757	2	0.928911	322	34.8894	6.44287
	A2	Sequence	# PSMs	# Proteins	# Protein Groups	Protein Group Accessions	Modifications	ΔCn	Area	(Medium+Heavy)/Light	(Medium+Heavy)/Light Count	(Medium+Heavy)/Light Variability [%]	q-Value	PEP	IonScore	Exp Value	Charge	MH+ [Da]	ΔM [ppm]	RT [min]	# Missed Cleavages
	High	IAEVGAGGNK	2	1	1	Q00577		0	126773487	0.113466	1		0	0.005752	51.03	9.93964e-05	2	915.489	-0.125456	26.2522	0
	Medium	SEFLVR	2	1	1	Q00577		0	2.35168e+06	0.112053	1		0.037	0.2058	20.2	0.219648	2	750.414	-0.195973	47.2744	0
Q13554	Calcium/calmodulin-dependent protein kinase type II subunit beta OS=Homo sapiens GN=CAMK2B PE=1 SV=3 - [KCC2B_HUMAN]	57.5933	3.6	3	1	2	3	5.18672e+07	0.502796	1		666	72.632	7.26904
	A2	Sequence	# PSMs	# Proteins	# Protein Groups	Protein Group Accessions	Modifications	ΔCn	Area	(Medium+Heavy)/Light	(Medium+Heavy)/Light Count	(Medium+Heavy)/Light Variability [%]	q-Value	PEP	IonScore	Exp Value	Charge	MH+ [Da]	ΔM [ppm]	RT [min]	# Missed Cleavages
	High	GAILTTmLATR	2	3	2	Q9UQM7;Q13554	M7(Oxidation)	0	100227276				0	0.0009728	45.33	0.000461616	2	1163.65	0.60791	53.1	0
	High	NLINQmLTINPAK	1	2	1	Q13554	M6(Oxidation)	0	3.50715e+06	0.502796	1		0.005	0.06064	21.64	0.0695771	2	1485.81	3.5661	60.2965	0
P60880	Synaptosomal-associated protein 25 OS=Homo sapiens GN=SNAP25 PE=1 SV=1 - [SNP25_HUMAN]	57.3399	15.53	1	3	3	3	2.57598e+07	0.619618	2	75.6408	206	23.3002	4.76709
	A2	Sequence	# PSMs	# Proteins	# Protein Groups	Protein Group Accessions	Modifications	ΔCn	Area	(Medium+Heavy)/Light	(Medium+Heavy)/Light Count	(Medium+Heavy)/Light Variability [%]	q-Value	PEP	IonScore	Exp Value	Charge	MH+ [Da]	ΔM [ppm]	RT [min]	# Missed Cleavages
	High	TLVmLDEQGEQLER	1	1	1	P60880	M4(Oxidation)	0	8.66325e+06				0	0.007197	30.71	0.00959574	2	1676.82	-0.132873	57.0682	0
	High	EQmAISGGFIR	1	1	1	P60880	M3(Oxidation)	0	35142771	0.975348	1		0	0.009622	29.5	0.0160449	2	1224.6	0.272322	52.007	0
	Medium	IDEANQR	1	1	1	P60880		0	33473393	0.393631	1		0.025	0.1277	30.38	0.0070549	2	845.411	-0.253124	18.0073	0
P61106	Ras-related protein Rab-14 OS=Homo sapiens GN=RAB14 PE=1 SV=4 - [RAB14_HUMAN]	57.2779	7.91	1	2	2	2	1.6961e+07	0.402234	1		215	23.8819	6.21436
	A2	Sequence	# PSMs	# Proteins	# Protein Groups	Protein Group Accessions	Modifications	ΔCn	Area	(Medium+Heavy)/Light	(Medium+Heavy)/Light Count	(Medium+Heavy)/Light Variability [%]	q-Value	PEP	IonScore	Exp Value	Charge	MH+ [Da]	ΔM [ppm]	RT [min]	# Missed Cleavages
	High	LTSEPQPQR	1	1	1	P61106		0	2.0168e+07				0	0.008206	44.66	0.000465092	2	1055.55	1.2531	27.0308	0
	High	IIEVSGQK	1	1	1	P61106		0	1.3754e+07	0.402234	1		0	0.01834	34.63	0.00547516	2	873.504	-0.111564	33.1882	0
P43304	Glycerol-3-phosphate dehydrogenase, mitochondrial OS=Homo sapiens GN=GPD2 PE=1 SV=3 - [GPDM_HUMAN]	56.62	2.34	1	2	2	2	1.7989e+07				727	80.8016	7.69385
	A2	Sequence	# PSMs	# Proteins	# Protein Groups	Protein Group Accessions	Modifications	ΔCn	Area	(Medium+Heavy)/Light	(Medium+Heavy)/Light Count	(Medium+Heavy)/Light Variability [%]	q-Value	PEP	IonScore	Exp Value	Charge	MH+ [Da]	ΔM [ppm]	RT [min]	# Missed Cleavages
	High	SADTQSISR	1	1	1	P43304		0	2.75565e+07				0	0.006459	45.41	0.000335217	2	964.469	-0.171514	23.7813	0
	High	TAEENLDR	1	1	1	P43304		0	8.42156e+06				0	0.005242	26.21	0.0184285	2	947.444	0.909695	26.3377	0
Q06830	Peroxiredoxin-1 OS=Homo sapiens GN=PRDX1 PE=1 SV=1 - [PRDX1_HUMAN]	56.2135	14.57	2	2	3	4	6.50116e+07				199	22.0963	8.1333
	A2	Sequence	# PSMs	# Proteins	# Protein Groups	Protein Group Accessions	Modifications	ΔCn	Area	(Medium+Heavy)/Light	(Medium+Heavy)/Light Count	(Medium+Heavy)/Light Variability [%]	q-Value	PEP	IonScore	Exp Value	Charge	MH+ [Da]	ΔM [ppm]	RT [min]	# Missed Cleavages
	High	QITVNDLPVGR	2	2	2	P32119;Q06830		0	76389213				0	0.001241	34.54	0.00348045	2	1211.68	1.64716	56.7002	0
	Medium	ATAVmPDGQFK	1	1	1	Q06830	M5(Oxidation)	0	61439766				0.016	0.08199	18.91	0.145237	2	1180.57	0.0540077	38.0769	0
	Medium	SVDETLR	1	2	1	Q06830		0	57205715				0.023	0.1173	33.7	0.00723052	2	819.42	-0.532877	32.0838	0
P46821	Microtubule-associated protein 1B OS=Homo sapiens GN=MAP1B PE=1 SV=2 - [MAP1B_HUMAN]	56.1867	2.96	1	6	7	8	2.71936e+07	0.46214	3	16.6173	2468	270.468	4.80518
	A2	Sequence	# PSMs	# Proteins	# Protein Groups	Protein Group Accessions	Modifications	ΔCn	Area	(Medium+Heavy)/Light	(Medium+Heavy)/Light Count	(Medium+Heavy)/Light Variability [%]	q-Value	PEP	IonScore	Exp Value	Charge	MH+ [Da]	ΔM [ppm]	RT [min]	# Missed Cleavages
	High	SVGNTIDPVILFQK	1	1	1	P46821		0	4.0811e+06	0.649567	1		0	0.02135	27.22	0.015553	2	1530.85	1.44671	75.6464	0
	High	DLSTPGLEK	1	1	1	P46821		0	11243817	0.46214	1		0	0.01541	23.65	0.0642963	2	959.503	-1.98151	42.3218	0
	High	DLTGQVPTPVVK	1	1	1	P46821		0	22873965				0	0.01065	15.03	0.205703	2	1253.71	-0.51297	53.453	0
	High	GAESPFEEK	1	1	1	P46821		0	33244841	0.413454	1		0.002	0.03521	14.25	0.266845	2	993.454	1.18631	37.8197	0
	High	AVLDALLEGK	2	2	2	P78559;P46821		0	2.5462e+07				0.003	0.04109	26.57	0.0181741	2	1028.6	1.28513	68.6293	0
	Medium	DSVAAGKPK	1	1	1	P46821		0	0				0.019	0.09244	15.77	0.402572	2	872.483	-0.526548	17.8647	0
	Medium	TATAGPGTTK	1	1	1	P46821		0	1.40866e+07				0.037	0.2067	35.3	0.00545974	2	904.473	-0.184748	17.4738	0
P21796	Voltage-dependent anion-selective channel protein 1 OS=Homo sapiens GN=VDAC1 PE=1 SV=2 - [VDAC1_HUMAN]	55.4403	11.31	1	3	3	3	6.79738e+07	0.737619	2	103.157	283	30.7536	8.54346
	A2	Sequence	# PSMs	# Proteins	# Protein Groups	Protein Group Accessions	Modifications	ΔCn	Area	(Medium+Heavy)/Light	(Medium+Heavy)/Light Count	(Medium+Heavy)/Light Variability [%]	q-Value	PEP	IonScore	Exp Value	Charge	MH+ [Da]	ΔM [ppm]	RT [min]	# Missed Cleavages
	High	LTFDSSFSPNTGK	1	1	1	P21796		0	1.02017e+07	1.30979	1		0	0.004086	36.96	0.0022453	2	1400.67	-0.474487	57.1336	0
	High	VTQSNFAVGYK	1	1	1	P21796		0	43050209				0	0.01225	28.09	0.0192496	2	1213.63	3.16926	46.5098	0
	Medium	VTGSLETK	1	1	1	P21796		0	150669432	0.415397	1		0.022	0.102	27.88	0.0430949	2	834.456	-0.570321	25.9481	0
P78559	Microtubule-associated protein 1A OS=Homo sapiens GN=MAP1A PE=1 SV=6 - [MAP1A_HUMAN]	55.3829	2.75	1	6	7	8	3.11015e+07	0.222658	2	63.2914	2803	305.298	4.91943
	A2	Sequence	# PSMs	# Proteins	# Protein Groups	Protein Group Accessions	Modifications	ΔCn	Area	(Medium+Heavy)/Light	(Medium+Heavy)/Light Count	(Medium+Heavy)/Light Variability [%]	q-Value	PEP	IonScore	Exp Value	Charge	MH+ [Da]	ΔM [ppm]	RT [min]	# Missed Cleavages
	High	ELSSEPQTPPAQK	1	1	1	P78559		0	1.02832e+07	0.329352	1		0	0.02509	22.64	0.0794974	2	1411.71	5.40163	32.6806	0
	High	VPSAPGQESPIPDPK	1	1	1	P78559		0	6.31552e+06				0	0.02489	13.02	0.656033	2	1518.78	2.34633	47.1866	0
	High	ALALAPGPPTR	1	1	1	P78559		0	2.43255e+07				0.001	0.03054	20.68	0.0624199	2	1063.63	-0.132828	48.9712	0
	High	AGPmALSSK	1	1	1	P78559	M4(Oxidation)	0	4.18082e+07	0.150528	1		0.003	0.0525	27.48	0.0245642	2	877.445	-0.168202	27.2548	0
	High	AVLDALLEGK	2	2	2	P78559;P46821		0	2.5462e+07				0.003	0.04109	26.57	0.0181741	2	1028.6	1.28513	68.6293	0
	High	ELSSPISPK	1	1	1	P78559		0	2.60342e+07				0.003	0.03822	14.27	0.505049	2	957.523	-1.77145	42.8238	0
	Medium	LGIQAEPLYR	1	1	1	P78559		0	1.73895e+06				0.041	0.2235	21.58	0.0865305	2	1159.64	-1.79903	57.6025	0
Q12860	Contactin-1 OS=Homo sapiens GN=CNTN1 PE=1 SV=1 - [CNTN1_HUMAN]	54.74	5.5	1	5	5	5	4.51031e+07	0.680019	3	24.2478	1018	113.249	5.89697
	A2	Sequence	# PSMs	# Proteins	# Protein Groups	Protein Group Accessions	Modifications	ΔCn	Area	(Medium+Heavy)/Light	(Medium+Heavy)/Light Count	(Medium+Heavy)/Light Variability [%]	q-Value	PEP	IonScore	Exp Value	Charge	MH+ [Da]	ΔM [ppm]	RT [min]	# Missed Cleavages
	High	VTVTNPDTGR	1	1	1	Q12860		0	3.18552e+07	0.680019	1		0	0.00634	38.22	0.00222225	2	1059.54	1.20406	31.4091	0
	High	IKTDGAAPNVAPSDVGGGGGR	1	1	1	Q12860		0	2.31598e+06				0	0.01598	18.59	0.143199	3	1895.96	2.04137	42.3695	1
	High	YTIQTK	1	1	1	Q12860		0	2.16269e+07	0.453551	1		0.001	0.0305	21.73	0.0835929	2	753.413	-1.66164	30.346	0
	Medium	GPPGPPGGLR	1	1	1	Q12860		0	21556638	0.798983	1		0.022	0.1137	27.2	0.0361085	2	904.5	-0.275154	38.9378	0
	Medium	VVATNTLGR	1	1	1	Q12860		0	81827104				0.029	0.1595	19.61	0.162999	2	930.538	1.28864	33.7737	0
P35612	Beta-adducin OS=Homo sapiens GN=ADD2 PE=1 SV=3 - [ADDB_HUMAN]	53.27	1.24	1	1	1	1	1.05521e+07				726	80.8034	5.92236
	A2	Sequence	# PSMs	# Proteins	# Protein Groups	Protein Group Accessions	Modifications	ΔCn	Area	(Medium+Heavy)/Light	(Medium+Heavy)/Light Count	(Medium+Heavy)/Light Variability [%]	q-Value	PEP	IonScore	Exp Value	Charge	MH+ [Da]	ΔM [ppm]	RT [min]	# Missed Cleavages
	High	VNVADEVQR	1	1	1	P35612		0	1.05521e+07				0	0.001466	53.27	5.93431e-05	2	1029.53	-1.07204	37.6367	0
P05129	Protein kinase C gamma type OS=Homo sapiens GN=PRKCG PE=1 SV=3 - [KPCG_HUMAN]	53.1972	4.16	1	3	3	4	2.77999e+07	0.317132	2	12.7607	697	78.3972	7.45947
	A2	Sequence	# PSMs	# Proteins	# Protein Groups	Protein Group Accessions	Modifications	ΔCn	Area	(Medium+Heavy)/Light	(Medium+Heavy)/Light Count	(Medium+Heavy)/Light Variability [%]	q-Value	PEP	IonScore	Exp Value	Charge	MH+ [Da]	ΔM [ppm]	RT [min]	# Missed Cleavages
	High	LGSGPDGEPTIR	2	1	1	P05129		0	50231156	0.345517	1		0	0.001773	32.02	0.0100489	2	1198.61	0.0496751	41.5116	0
	High	SPTSPVPVPVm	1	1	1	P05129	M11(Oxidation)	0	2.76131e+07				0.002	0.03515	17.89	0.271467	2	1126.58	0.98418	54.7251	0
	Medium	LQLEIR	1	1	1	P05129		0	5555345	0.291079	1		0.035	0.1908	37.9	0.00141908	2	771.472	-0.729746	52.9336	0
Q00839	Heterogeneous nuclear ribonucleoprotein U OS=Homo sapiens GN=HNRNPU PE=1 SV=6 - [HNRPU_HUMAN]	52.28	4	1	2	2	2	9.17019e+06				825	90.528	5.99854
	A2	Sequence	# PSMs	# Proteins	# Protein Groups	Protein Group Accessions	Modifications	ΔCn	Area	(Medium+Heavy)/Light	(Medium+Heavy)/Light Count	(Medium+Heavy)/Light Variability [%]	q-Value	PEP	IonScore	Exp Value	Charge	MH+ [Da]	ΔM [ppm]	RT [min]	# Missed Cleavages
	High	SSGPTSLFAVTVAPPGAR	1	1	1	Q00839		0	8.32101e+06				0	0.007827	45.9	0.00025961	2	1714.91	0.456138	70.9566	0
	High	NFILDQTNVSAAAQR	1	1	1	Q00839		0	1.00194e+07				0	0.02598	21.38	0.115717	2	1647.84	-1.01465	59.4775	0
P22314	Ubiquitin-like modifier-activating enzyme 1 OS=Homo sapiens GN=UBA1 PE=1 SV=3 - [UBA1_HUMAN]	52.0135	1.51	1	2	2	2	9.75539e+06	0.205086	1		1058	117.774	5.75732
	A2	Sequence	# PSMs	# Proteins	# Protein Groups	Protein Group Accessions	Modifications	ΔCn	Area	(Medium+Heavy)/Light	(Medium+Heavy)/Light Count	(Medium+Heavy)/Light Variability [%]	q-Value	PEP	IonScore	Exp Value	Charge	MH+ [Da]	ΔM [ppm]	RT [min]	# Missed Cleavages
	High	SDTAAAAVR	1	1	1	P22314		0	3.84316e+06	0.205086	1		0	0.002946	38.88	0.00198659	2	861.442	-1.09744	24.3009	0
	Medium	AEVSQPR	1	1	1	P22314		0	1.56676e+07				0.022	0.1138	31.76	0.00560118	2	786.411	1.04421	20.7773	0
Q9NSD9	Phenylalanine--tRNA ligase beta subunit OS=Homo sapiens GN=FARSB PE=1 SV=3 - [SYFB_HUMAN]	51.8	7.98	1	5	5	5	2.08646e+07				589	66.0735	6.84424
	A2	Sequence	# PSMs	# Proteins	# Protein Groups	Protein Group Accessions	Modifications	ΔCn	Area	(Medium+Heavy)/Light	(Medium+Heavy)/Light Count	(Medium+Heavy)/Light Variability [%]	q-Value	PEP	IonScore	Exp Value	Charge	MH+ [Da]	ΔM [ppm]	RT [min]	# Missed Cleavages
	High	TAEFQVAR	1	1	1	Q9NSD9		0	21555215				0	0.003198	39.51	0.00211574	2	921.478	-0.565593	39.7385	0
	High	LIITEETAK	1	1	1	Q9NSD9		0	2.60353e+07				0	0.01588	27.43	0.0206018	2	1017.58	0.707875	44.5663	0
	High	ASEGPAFFPGR	1	1	1	Q9NSD9		0	6.82971e+06				0	0.005298	19.3	0.143925	2	1135.55	1.07224	55.4363	0
	Medium	AAGASDVVLYK	1	1	1	Q9NSD9		0	1.74151e+06				0.016	0.0799	16.56	0.380881	2	1093.59	3.74162	46.8808	0
	Medium	ETPENLAK	1	1	1	Q9NSD9		0	1.50032e+07				0.031	0.165	12.43	0.805785	2	901.463	0.395938	31.1972	0
P0CG48	Polyubiquitin-C OS=Homo sapiens GN=UBC PE=1 SV=3 - [UBC_HUMAN]	51.675	65.69	4	6	6	11	1.45276e+08	0.343553	3	58.6307	685	76.9915	7.66455
	A2	Sequence	# PSMs	# Proteins	# Protein Groups	Protein Group Accessions	Modifications	ΔCn	Area	(Medium+Heavy)/Light	(Medium+Heavy)/Light Count	(Medium+Heavy)/Light Variability [%]	q-Value	PEP	IonScore	Exp Value	Charge	MH+ [Da]	ΔM [ppm]	RT [min]	# Missed Cleavages
	High	TITLEVEPSDTIENVK	1	4	1	P0CG48		0	7.18884e+07				0	0.0001834	32.03	0.00808332	2	1787.93	0.360649	63.6719	0
	High	IQDKEGIPPDQQR	3	4	1	P0CG48		0	1.01603e+06	0.495702	1		0	0.01761	17.03	0.262552	3	1523.78	-0.344819	35.6607	1
	High	TLSDYNIQK	1	4	1	P0CG48		0	105969916				0.001	0.03229	20.14	0.149115	2	1081.55	1.33078	41.6713	0
	High	EGIPPDQQR	3	4	1	P0CG48		0	0				0.003	0.04887	12.9	0.884686	2	1039.52	1.54576	28.9169	0
	Medium	QLEDGR	2	4	1	P0CG48		0	8.00428e+06	0.188736	1		0.021	0.09319	12.95	0.387848	2	717.353	0.107941	18.0351	0
	Medium	mQIFVK	1	4	1	P0CG48	M1(Oxidation)	0	257968992	0.343553	1		0.027	0.1477	11.44	1.00491	2	781.427	-0.775137	40.4171	0
P28331	NADH-ubiquinone oxidoreductase 75 kDa subunit, mitochondrial OS=Homo sapiens GN=NDUFS1 PE=1 SV=3 - [NDUS1_HUMAN]	51.22	3.99	1	3	3	4	1.29693e+07				727	79.4165	6.22705
	A2	Sequence	# PSMs	# Proteins	# Protein Groups	Protein Group Accessions	Modifications	ΔCn	Area	(Medium+Heavy)/Light	(Medium+Heavy)/Light Count	(Medium+Heavy)/Light Variability [%]	q-Value	PEP	IonScore	Exp Value	Charge	MH+ [Da]	ΔM [ppm]	RT [min]	# Missed Cleavages
	High	SATYVNTEGR	1	1	1	P28331		0	1.51333e+07				0	0.004651	27.97	0.0130862	2	1097.52	0.493272	30.8984	0
	High	VAVTPPGLAR	2	1	1	P28331		0	1.76557e+07				0.001	0.02765	36.12	0.00123393	2	980.589	-0.133241	47.7663	0
	High	FEAPLFNAR	1	1	1	P28331		0	6.11886e+06				0.003	0.05267	12.94	1.00616	2	1064.55	2.06822	63.2387	0
P28482	Mitogen-activated protein kinase 1 OS=Homo sapiens GN=MAPK1 PE=1 SV=3 - [MK01_HUMAN]	51.12	5	2	2	2	4	2.27571e+07	0.47569	2	19.3258	360	41.3632	6.97607
	A2	Sequence	# PSMs	# Proteins	# Protein Groups	Protein Group Accessions	Modifications	ΔCn	Area	(Medium+Heavy)/Light	(Medium+Heavy)/Light Count	(Medium+Heavy)/Light Variability [%]	q-Value	PEP	IonScore	Exp Value	Charge	MH+ [Da]	ΔM [ppm]	RT [min]	# Missed Cleavages
	High	GQVFDVGPR	3	1	1	P28482		0	2.13309e+07	0.418053	1		0	0.01822	40.87	0.00115813	2	974.505	-0.106354	48.8146	0
	High	APEImLNSK	1	2	1	P28482	M5(Oxidation)	0	2.41832e+07	0.541273	1		0	0.01839	17.25	0.243933	2	1018.52	0.573699	41.3337	0
P62917	60S ribosomal protein L8 OS=Homo sapiens GN=RPL8 PE=1 SV=2 - [RL8_HUMAN]	50.97	4.28	1	1	1	1	10218984				257	28.0073	11.0337
	A2	Sequence	# PSMs	# Proteins	# Protein Groups	Protein Group Accessions	Modifications	ΔCn	Area	(Medium+Heavy)/Light	(Medium+Heavy)/Light Count	(Medium+Heavy)/Light Variability [%]	q-Value	PEP	IonScore	Exp Value	Charge	MH+ [Da]	ΔM [ppm]	RT [min]	# Missed Cleavages
	High	AVVGVVAGGGR	1	1	1	P62917		0	10218984				0	0.005252	50.97	3.99917e-05	2	941.552	-0.366987	38.7414	0
P48047	ATP synthase subunit O, mitochondrial OS=Homo sapiens GN=ATP5O PE=1 SV=1 - [ATPO_HUMAN]	50.73	10.8	1	2	2	2	8655639				213	23.2627	9.96436
	A2	Sequence	# PSMs	# Proteins	# Protein Groups	Protein Group Accessions	Modifications	ΔCn	Area	(Medium+Heavy)/Light	(Medium+Heavy)/Light Count	(Medium+Heavy)/Light Variability [%]	q-Value	PEP	IonScore	Exp Value	Charge	MH+ [Da]	ΔM [ppm]	RT [min]	# Missed Cleavages
	High	VAASVLNPYVK	1	1	1	P48047		0	8.75721e+06				0	0.001597	50	9.3e-05	2	1160.67	0.293717	55.7602	0
	High	TDPSILGGmIVR	1	1	1	P48047	M9(Oxidation)	0	8.55407e+06				0	0.0167	15.23	0.425881	2	1274.68	0.22249	58.9369	0
O60814	Histone H2B type 1-K OS=Homo sapiens GN=HIST1H2BK PE=1 SV=3 - [H2B1K_HUMAN]	50.3279	19.05	15	3	3	5	2.43027e+08				126	13.8816	10.3159
	A2	Sequence	# PSMs	# Proteins	# Protein Groups	Protein Group Accessions	Modifications	ΔCn	Area	(Medium+Heavy)/Light	(Medium+Heavy)/Light Count	(Medium+Heavy)/Light Variability [%]	q-Value	PEP	IonScore	Exp Value	Charge	MH+ [Da]	ΔM [ppm]	RT [min]	# Missed Cleavages
	High	HAVSEGTK	1	15	1	O60814		0	2.11118e+06				0.006	0.06429	26.77	0.0270336	2	828.421	-0.114994	14.701	0
	High	LLLPGELAK	2	15	1	O60814		0	340792588				0.008	0.06823	34.46	0.000984765	2	953.604	0.600835	62.7968	0
	Medium	EIQTAVR	2	14	1	O60814		0	386177080				0.017	0.08353	24.7	0.0504878	2	816.457	-1.10449	29.6954	0
P40926	Malate dehydrogenase, mitochondrial OS=Homo sapiens GN=MDH2 PE=1 SV=3 - [MDHM_HUMAN]	50.1801	11.83	1	4	4	4	7.05643e+07	0.262593	1		338	35.4807	8.67529
	A2	Sequence	# PSMs	# Proteins	# Protein Groups	Protein Group Accessions	Modifications	ΔCn	Area	(Medium+Heavy)/Light	(Medium+Heavy)/Light Count	(Medium+Heavy)/Light Variability [%]	q-Value	PEP	IonScore	Exp Value	Charge	MH+ [Da]	ΔM [ppm]	RT [min]	# Missed Cleavages
	High	AGAGSATLSmAYAGAR	1	1	1	P40926	M10(Oxidation)	0	7.25545e+06				0.004	0.0564	21.61	0.0672984	2	1470.7	1.80755	44.4521	0
	Medium	NSPLVSR	1	1	1	P40926		0	2.76549e+07				0.018	0.08923	29.25	0.0162825	2	772.431	-0.172737	30.4839	0
	Medium	VSSFEEK	1	1	1	P40926		0	45435658	0.262593	1		0.022	0.1146	35.09	0.00359301	2	825.398	-1.03398	28.7406	0
	Medium	IQEAGTEVVK	1	1	1	P40926		0	138602374				0.031	0.1663	14.94	0.506591	2	1073.58	0.697621	34.4485	0
P50991	T-complex protein 1 subunit delta OS=Homo sapiens GN=CCT4 PE=1 SV=4 - [TCPD_HUMAN]	49.65	3.9	1	2	2	2	4.95176e+06				539	57.8878	7.82568
	A2	Sequence	# PSMs	# Proteins	# Protein Groups	Protein Group Accessions	Modifications	ΔCn	Area	(Medium+Heavy)/Light	(Medium+Heavy)/Light Count	(Medium+Heavy)/Light Variability [%]	q-Value	PEP	IonScore	Exp Value	Charge	MH+ [Da]	ΔM [ppm]	RT [min]	# Missed Cleavages
	High	VIDPATATSVDLR	1	1	1	P50991		0	6.71941e+06				0	0.01505	34.72	0.00443533	2	1357.73	-2.52918	56.0552	0
	High	VSNSGITR	1	1	1	P50991		0	3.18411e+06				0.003	0.0446	32.93	0.00901516	2	833.448	0.252211	23.2286	0
P62701	40S ribosomal protein S4, X isoform OS=Homo sapiens GN=RPS4X PE=1 SV=2 - [RS4X_HUMAN]	49.57	2.66	1	1	1	1	2.39853e+07	0.180987	1		263	29.5791	10.1548
	A2	Sequence	# PSMs	# Proteins	# Protein Groups	Protein Group Accessions	Modifications	ΔCn	Area	(Medium+Heavy)/Light	(Medium+Heavy)/Light Count	(Medium+Heavy)/Light Variability [%]	q-Value	PEP	IonScore	Exp Value	Charge	MH+ [Da]	ΔM [ppm]	RT [min]	# Missed Cleavages
	High	IGVITNR	1	1	1	P62701		0	2.39853e+07	0.180987	1		0.003	0.04017	49.57	0.000184381	2	772.468	0.0474205	37.5432	0
P05141	ADP/ATP translocase 2 OS=Homo sapiens GN=SLC25A5 PE=1 SV=7 - [ADT2_HUMAN]	49.21	6.04	4	2	2	3	249664936	0.621927	1		298	32.8312	9.68604
	A2	Sequence	# PSMs	# Proteins	# Protein Groups	Protein Group Accessions	Modifications	ΔCn	Area	(Medium+Heavy)/Light	(Medium+Heavy)/Light Count	(Medium+Heavy)/Light Variability [%]	q-Value	PEP	IonScore	Exp Value	Charge	MH+ [Da]	ΔM [ppm]	RT [min]	# Missed Cleavages
	High	TAVAPIER	2	4	1	P05141		0	249664936	0.621927	1		0.001	0.0273	49.21	0.000136143	2	856.489	0.0885359	35.1638	0
	High	LLLQVQHASK	1	3	1	P05141		0	0				0.005	0.06017	13.95	0.155046	3	1136.68	0.449587	49.3937	0
Q00325	Phosphate carrier protein, mitochondrial OS=Homo sapiens GN=SLC25A3 PE=1 SV=2 - [MPCP_HUMAN]	49.05	3.31	1	1	1	2	5.19693e+07				362	40.0687	9.37842
	A2	Sequence	# PSMs	# Proteins	# Protein Groups	Protein Group Accessions	Modifications	ΔCn	Area	(Medium+Heavy)/Light	(Medium+Heavy)/Light Count	(Medium+Heavy)/Light Variability [%]	q-Value	PEP	IonScore	Exp Value	Charge	MH+ [Da]	ΔM [ppm]	RT [min]	# Missed Cleavages
	High	IQTQPGYANTLR	2	1	1	Q00325		0	5.19693e+07				0	0.007447	49.05	0.000220279	2	1361.72	-0.0151392	44.1179	0
Q96I24	Far upstream element-binding protein 3 OS=Homo sapiens GN=FUBP3 PE=1 SV=2 - [FUBP3_HUMAN]	49.02	1.4	3	1	1	1	1.01188e+07				572	61.6022	8.38232
	A2	Sequence	# PSMs	# Proteins	# Protein Groups	Protein Group Accessions	Modifications	ΔCn	Area	(Medium+Heavy)/Light	(Medium+Heavy)/Light Count	(Medium+Heavy)/Light Variability [%]	q-Value	PEP	IonScore	Exp Value	Charge	MH+ [Da]	ΔM [ppm]	RT [min]	# Missed Cleavages
	High	IQNDAGVR	1	3	1	Q96I24		0	1.01188e+07				0	0.01963	49.02	0.00013158	2	872.459	0.608251	24.1172	0
Q9UI12	V-type proton ATPase subunit H OS=Homo sapiens GN=ATP6V1H PE=1 SV=1 - [VATH_HUMAN]	48.8857	4.35	1	2	2	2	1.65899e+07	0.631742	1		483	55.8471	6.48096
	A2	Sequence	# PSMs	# Proteins	# Protein Groups	Protein Group Accessions	Modifications	ΔCn	Area	(Medium+Heavy)/Light	(Medium+Heavy)/Light Count	(Medium+Heavy)/Light Variability [%]	q-Value	PEP	IonScore	Exp Value	Charge	MH+ [Da]	ΔM [ppm]	RT [min]	# Missed Cleavages
	High	VIEQLGGK	1	1	1	Q9UI12		0	22194573				0	0.02522	51.9	5.77861e-05	2	843.493	-1.05513	35.4224	0
	High	QLQSEQPQTAAAR	1	1	1	Q9UI12		0	1.09852e+07	0.631742	1		0.003	0.04819	14.75	0.532595	2	1427.72	-2.72817	30.861	0
Q99623	Prohibitin-2 OS=Homo sapiens GN=PHB2 PE=1 SV=2 - [PHB2_HUMAN]	47.96	10.37	1	3	3	3	1.09837e+07	0.454829	1		299	33.2759	9.83252
	A2	Sequence	# PSMs	# Proteins	# Protein Groups	Protein Group Accessions	Modifications	ΔCn	Area	(Medium+Heavy)/Light	(Medium+Heavy)/Light Count	(Medium+Heavy)/Light Variability [%]	q-Value	PEP	IonScore	Exp Value	Charge	MH+ [Da]	ΔM [ppm]	RT [min]	# Missed Cleavages
	High	IVQAEGEAEAAK	1	1	1	Q99623		0	2.37005e+07				0	0.00156	34.93	0.00387246	2	1215.62	-0.503464	31.8094	0
	High	QVAQQEAQR	1	1	1	Q99623		0	5.02383e+06	0.454829	1		0	0.01696	32.03	0.00698674	2	1057.54	0.65328	19.5769	0
	Medium	DLQmVNISLR	1	1	1	Q99623	M4(Oxidation)	0	4.22671e+06				0.037	0.203	10.13	1.56737	2	1204.64	4.3983	58.1488	0
P30086	Phosphatidylethanolamine-binding protein 1 OS=Homo sapiens GN=PEBP1 PE=1 SV=3 - [PEBP1_HUMAN]	47.9282	8.56	1	2	2	2	6.24808e+07	1.07059	1		187	21.0437	7.53271
	A2	Sequence	# PSMs	# Proteins	# Protein Groups	Protein Group Accessions	Modifications	ΔCn	Area	(Medium+Heavy)/Light	(Medium+Heavy)/Light Count	(Medium+Heavy)/Light Variability [%]	q-Value	PEP	IonScore	Exp Value	Charge	MH+ [Da]	ΔM [ppm]	RT [min]	# Missed Cleavages
	High	LYEQLSGK	1	1	1	P30086		0	22002007	1.07059	1		0	0.01479	35.93	0.00433959	2	937.499	0.388136	38.3154	0
	High	VLTPTQVK	1	1	1	P30086		0	102959614				0	0.01464	34.43	0.00219953	2	885.54	-0.458109	37.1386	0
P78352	Disks large homolog 4 OS=Homo sapiens GN=DLG4 PE=1 SV=3 - [DLG4_HUMAN]	47.92	1.66	1	1	1	1	27211836	0.61525	1		724	80.4458	5.88428
	A2	Sequence	# PSMs	# Proteins	# Protein Groups	Protein Group Accessions	Modifications	ΔCn	Area	(Medium+Heavy)/Light	(Medium+Heavy)/Light Count	(Medium+Heavy)/Light Variability [%]	q-Value	PEP	IonScore	Exp Value	Charge	MH+ [Da]	ΔM [ppm]	RT [min]	# Missed Cleavages
	High	IIPGGAAAQDGR	1	1	1	P78352		0	27211836	0.61525	1		0	0.001133	47.92	0.000234082	2	1125.6	0.281386	34.8635	0
P78324	Tyrosine-protein phosphatase non-receptor type substrate 1 OS=Homo sapiens GN=SIRPA PE=1 SV=2 - [SHPS1_HUMAN]	47.91	4.56	3	2	2	3	1.91724e+07	0.409062	1		504	54.9328	6.97607
	A2	Sequence	# PSMs	# Proteins	# Protein Groups	Protein Group Accessions	Modifications	ΔCn	Area	(Medium+Heavy)/Light	(Medium+Heavy)/Light Count	(Medium+Heavy)/Light Variability [%]	q-Value	PEP	IonScore	Exp Value	Charge	MH+ [Da]	ΔM [ppm]	RT [min]	# Missed Cleavages
	High	SGAGTELSVR	2	3	1	P78324		0	35331508	0.409062	1		0	0.01662	47.91	0.00025323	2	976.505	-0.443016	36.6461	0
	High	SVLVAAGETATLR	1	1	1	P78324		0	3.0133e+06				0.006	0.06607	22.14	0.0546793	2	1287.72	-1.63414	55.8086	0
P62158	Calmodulin OS=Homo sapiens GN=CALM1 PE=1 SV=2 - [CALM_HUMAN]	46.7	10.74	3	2	2	3	2.99896e+08	0.691826	2	27.4277	149	16.8268	4.22119
	A2	Sequence	# PSMs	# Proteins	# Protein Groups	Protein Group Accessions	Modifications	ΔCn	Area	(Medium+Heavy)/Light	(Medium+Heavy)/Light Count	(Medium+Heavy)/Light Variability [%]	q-Value	PEP	IonScore	Exp Value	Charge	MH+ [Da]	ΔM [ppm]	RT [min]	# Missed Cleavages
	High	DGDGTITTK	1	1	1	P62158		0	16992961	0.829637	1		0	0.007242	39.84	0.00112572	2	907.436	-0.478716	21.7782	0
	Medium	ELGTVmR	2	3	1	P62158	M6(Oxidation)	0	582799488	0.576907	1		0.037	0.2066	24.36	0.0732875	2	821.418	-0.284557	30.1186	0
P45880	Voltage-dependent anion-selective channel protein 2 OS=Homo sapiens GN=VDAC2 PE=1 SV=2 - [VDAC2_HUMAN]	46.43	7.48	1	2	2	2	1.45262e+07				294	31.5465	7.56201
	A2	Sequence	# PSMs	# Proteins	# Protein Groups	Protein Group Accessions	Modifications	ΔCn	Area	(Medium+Heavy)/Light	(Medium+Heavy)/Light Count	(Medium+Heavy)/Light Variability [%]	q-Value	PEP	IonScore	Exp Value	Charge	MH+ [Da]	ΔM [ppm]	RT [min]	# Missed Cleavages
	High	LTLSALVDGK	1	1	1	P45880		0	6.57623e+06				0	0.007138	35.41	0.0035392	2	1016.6	0.34952	65.8548	0
	High	YQLDPTASISAK	1	1	1	P45880		0	22476232				0	0.01877	29.02	0.0238723	2	1293.67	4.2101	52.6161	0
P14625	Endoplasmin OS=Homo sapiens GN=HSP90B1 PE=1 SV=1 - [ENPL_HUMAN]	46.22	3.11	1	3	3	3	9.25467e+06	0.966502	1		803	92.4113	4.84326
	A2	Sequence	# PSMs	# Proteins	# Protein Groups	Protein Group Accessions	Modifications	ΔCn	Area	(Medium+Heavy)/Light	(Medium+Heavy)/Light Count	(Medium+Heavy)/Light Variability [%]	q-Value	PEP	IonScore	Exp Value	Charge	MH+ [Da]	ΔM [ppm]	RT [min]	# Missed Cleavages
	High	TDDEVVQR	1	1	1	P14625		0	2.97803e+06	0.966502	1		0	0.003155	35	0.00276699	2	961.457	-1.85929	26.7732	0
	High	EAESSPFVER	1	1	1	P14625		0	6.35595e+06				0	0.006882	25.72	0.0230408	2	1150.54	0.506056	41.696	0
	Medium	NLGTIAK	1	1	1	P14625		0	18430039				0.038	0.2104	19.16	0.210523	2	716.43	0.0154165	33.971	0
Q8N163	DBIRD complex subunit KIAA1967 OS=Homo sapiens GN=KIAA1967 PE=1 SV=2 - [K1967_HUMAN]	45.63	0.98	1	1	1	1	1.20841e+07				923	102.838	5.22412
	A2	Sequence	# PSMs	# Proteins	# Protein Groups	Protein Group Accessions	Modifications	ΔCn	Area	(Medium+Heavy)/Light	(Medium+Heavy)/Light Count	(Medium+Heavy)/Light Variability [%]	q-Value	PEP	IonScore	Exp Value	Charge	MH+ [Da]	ΔM [ppm]	RT [min]	# Missed Cleavages
	High	LAEAEETAR	1	1	1	Q8N163		0	1.20841e+07				0.003	0.04724	45.63	0.000326865	2	989.487	-2.8542	27.0999	0
P17252	Protein kinase C alpha type OS=Homo sapiens GN=PRKCA PE=1 SV=4 - [KPCA_HUMAN]	45.52	1.19	1	1	1	1	2.14584e+07	0.654357	1		672	76.7001	7.04932
	A2	Sequence	# PSMs	# Proteins	# Protein Groups	Protein Group Accessions	Modifications	ΔCn	Area	(Medium+Heavy)/Light	(Medium+Heavy)/Light Count	(Medium+Heavy)/Light Variability [%]	q-Value	PEP	IonScore	Exp Value	Charge	MH+ [Da]	ΔM [ppm]	RT [min]	# Missed Cleavages
	High	VISPSEDR	1	1	1	P17252		0	2.14584e+07	0.654357	1		0	0.005066	45.52	0.000346471	2	902.458	-0.292723	28.2075	0
Q9UN36	Protein NDRG2 OS=Homo sapiens GN=NDRG2 PE=1 SV=2 - [NDRG2_HUMAN]	44.23	3.77	1	1	1	1	1.37704e+07				371	40.7722	5.21143
	A2	Sequence	# PSMs	# Proteins	# Protein Groups	Protein Group Accessions	Modifications	ΔCn	Area	(Medium+Heavy)/Light	(Medium+Heavy)/Light Count	(Medium+Heavy)/Light Variability [%]	q-Value	PEP	IonScore	Exp Value	Charge	MH+ [Da]	ΔM [ppm]	RT [min]	# Missed Cleavages
	High	TASLTSAASVDGNR	1	1	1	Q9UN36		0	1.37704e+07				0	0.000372	44.23	0.000609779	2	1349.67	0.515731	40.4089	0
O00264	Membrane-associated progesterone receptor component 1 OS=Homo sapiens GN=PGRMC1 PE=1 SV=3 - [PGRC1_HUMAN]	43.72	12.31	1	3	3	3	9.84913e+06	0.0666503	1		195	21.6578	4.70361
	A2	Sequence	# PSMs	# Proteins	# Protein Groups	Protein Group Accessions	Modifications	ΔCn	Area	(Medium+Heavy)/Light	(Medium+Heavy)/Light Count	(Medium+Heavy)/Light Variability [%]	q-Value	PEP	IonScore	Exp Value	Charge	MH+ [Da]	ΔM [ppm]	RT [min]	# Missed Cleavages
	High	DFTPAELR	1	1	1	O00264		0	8.18832e+06	0.0666503	1		0.004	0.05506	19.6	0.171051	2	948.479	0.313238	51.7667	0
	Medium	ILmAINGK	1	1	1	O00264	M3(Oxidation)	0	1.32933e+07				0.026	0.1289	10.97	0.887816	2	875.502	-0.0886881	39.1059	0
	Medium	FDGVQDPR	1	1	1	O00264		0	8.06572e+06				0.029	0.1578	41.12	0.000537013	2	933.439	-3.49751	36.7424	0
Q9NR46	Endophilin-B2 OS=Homo sapiens GN=SH3GLB2 PE=1 SV=1 - [SHLB2_HUMAN]	43.02	2.03	1	1	1	1	3.69178e+06				395	43.9466	5.98584
	A2	Sequence	# PSMs	# Proteins	# Protein Groups	Protein Group Accessions	Modifications	ΔCn	Area	(Medium+Heavy)/Light	(Medium+Heavy)/Light Count	(Medium+Heavy)/Light Variability [%]	q-Value	PEP	IonScore	Exp Value	Charge	MH+ [Da]	ΔM [ppm]	RT [min]	# Missed Cleavages
	High	VAQTEFDR	1	1	1	Q9NR46		0	3.69178e+06				0	0.004341	43.02	0.000643561	2	965.468	-0.500294	33.6296	0
P17677	Neuromodulin OS=Homo sapiens GN=GAP43 PE=1 SV=1 - [NEUM_HUMAN]	42.58	9.24	1	2	2	2	2.21307e+07	0.561012	1		238	24.7879	4.71631
	A2	Sequence	# PSMs	# Proteins	# Protein Groups	Protein Group Accessions	Modifications	ΔCn	Area	(Medium+Heavy)/Light	(Medium+Heavy)/Light Count	(Medium+Heavy)/Light Variability [%]	q-Value	PEP	IonScore	Exp Value	Charge	MH+ [Da]	ΔM [ppm]	RT [min]	# Missed Cleavages
	High	AEDAPAKEEPK	1	1	1	P17677		0	2.95184e+07	0.561012	1		0	0.01343	19.28	0.130425	3	1184.58	1.65689	22.9899	1
	High	AGSAETESATK	1	1	1	P17677		0	14742929				0.001	0.03183	37.8	0.00126958	2	1051.49	0.135754	16.7312	0
Q9P121	Neurotrimin OS=Homo sapiens GN=NTM PE=1 SV=1 - [NTRI_HUMAN]	42.53	2.33	2	1	1	2	1.21443e+07	0.17554	1		344	37.9475	7.81104
	A2	Sequence	# PSMs	# Proteins	# Protein Groups	Protein Group Accessions	Modifications	ΔCn	Area	(Medium+Heavy)/Light	(Medium+Heavy)/Light Count	(Medium+Heavy)/Light Variability [%]	q-Value	PEP	IonScore	Exp Value	Charge	MH+ [Da]	ΔM [ppm]	RT [min]	# Missed Cleavages
	High	QGESATLR	2	2	1	Q9P121		0	1.21443e+07	0.17554	1		0	0.01392	40.18	0.00151106	2	861.44	-2.85715	25.3158	0
Q04837	Single-stranded DNA-binding protein, mitochondrial OS=Homo sapiens GN=SSBP1 PE=1 SV=1 - [SSBP_HUMAN]	42.42	5.41	1	1	1	1	2.21489e+07	0.118344	1		148	17.249	9.59814
	A2	Sequence	# PSMs	# Proteins	# Protein Groups	Protein Group Accessions	Modifications	ΔCn	Area	(Medium+Heavy)/Light	(Medium+Heavy)/Light Count	(Medium+Heavy)/Light Variability [%]	q-Value	PEP	IonScore	Exp Value	Charge	MH+ [Da]	ΔM [ppm]	RT [min]	# Missed Cleavages
	High	VGQDPVLR	1	1	1	Q04837		0	2.21489e+07	0.118344	1		0	0.02058	42.42	0.000635804	2	883.5	0.390791	36.8762	0
P84098	60S ribosomal protein L19 OS=Homo sapiens GN=RPL19 PE=1 SV=1 - [RL19_HUMAN]	42.28	4.59	1	1	1	1	17933371				196	23.4512	11.4731
	A2	Sequence	# PSMs	# Proteins	# Protein Groups	Protein Group Accessions	Modifications	ΔCn	Area	(Medium+Heavy)/Light	(Medium+Heavy)/Light Count	(Medium+Heavy)/Light Variability [%]	q-Value	PEP	IonScore	Exp Value	Charge	MH+ [Da]	ΔM [ppm]	RT [min]	# Missed Cleavages
	High	LLADQAEAR	1	1	1	P84098		0	17933371				0	0.01048	42.28	0.000777904	2	986.525	-1.16883	34.4189	0
Q9Y285	Phenylalanine--tRNA ligase alpha subunit OS=Homo sapiens GN=FARSA PE=1 SV=3 - [SYFA_HUMAN]	41.82	2.17	1	1	1	1	5.39317e+07	0.247184	1		508	57.5275	7.79639
	A2	Sequence	# PSMs	# Proteins	# Protein Groups	Protein Group Accessions	Modifications	ΔCn	Area	(Medium+Heavy)/Light	(Medium+Heavy)/Light Count	(Medium+Heavy)/Light Variability [%]	q-Value	PEP	IonScore	Exp Value	Charge	MH+ [Da]	ΔM [ppm]	RT [min]	# Missed Cleavages
	High	VVDSmEDEVQR	1	1	1	Q9Y285	M5(Oxidation)	0	5.39317e+07	0.247184	1		0	0.002663	41.82	0.000328829	2	1322.59	1.79655	30.4406	0
P27338	Amine oxidase [flavin-containing] B OS=Homo sapiens GN=MAOB PE=1 SV=3 - [AOFB_HUMAN]	41.7	2.12	1	1	1	1	1.56022e+07				520	58.7252	7.50342
	A2	Sequence	# PSMs	# Proteins	# Protein Groups	Protein Group Accessions	Modifications	ΔCn	Area	(Medium+Heavy)/Light	(Medium+Heavy)/Light Count	(Medium+Heavy)/Light Variability [%]	q-Value	PEP	IonScore	Exp Value	Charge	MH+ [Da]	ΔM [ppm]	RT [min]	# Missed Cleavages
	High	IISTTNGGQER	1	1	1	P27338		0	1.56022e+07				0	0.002786	41.7	0.00118653	2	1175.6	0.266195	27.9911	0
P05496	ATP synthase F(0) complex subunit C1, mitochondrial OS=Homo sapiens GN=ATP5G1 PE=2 SV=2 - [AT5G1_HUMAN]	40.94	5.15	3	1	1	2	74361120	0.380339	1		136	14.2675	9.74463
	A2	Sequence	# PSMs	# Proteins	# Protein Groups	Protein Group Accessions	Modifications	ΔCn	Area	(Medium+Heavy)/Light	(Medium+Heavy)/Light Count	(Medium+Heavy)/Light Variability [%]	q-Value	PEP	IonScore	Exp Value	Charge	MH+ [Da]	ΔM [ppm]	RT [min]	# Missed Cleavages
	Medium	DIDTAAK	2	3	1	P05496		0	74361120	0.380339	1		0.016	0.08112	19.75	0.162595	2	733.372	-0.795488	20.7092	0
O75781	Paralemmin-1 OS=Homo sapiens GN=PALM PE=1 SV=2 - [PALM_HUMAN]	40.5541	7.24	1	3	3	3	1.42384e+07	0.259411	1		387	42.0502	4.99561
	A2	Sequence	# PSMs	# Proteins	# Protein Groups	Protein Group Accessions	Modifications	ΔCn	Area	(Medium+Heavy)/Light	(Medium+Heavy)/Light Count	(Medium+Heavy)/Light Variability [%]	q-Value	PEP	IonScore	Exp Value	Charge	MH+ [Da]	ΔM [ppm]	RT [min]	# Missed Cleavages
	High	ENAAAPSPVR	1	1	1	O75781		0	2.06142e+07				0	0.01953	27.45	0.033459	2	1011.52	0.0562367	30.1398	0
	High	APAPSPAKEER	1	1	1	O75781		0	1.33154e+06				0	0.003391	15.68	0.377202	3	1152.6	-0.395064	25.2368	1
	Medium	VSNTPLR	1	1	1	O75781		0	2.07695e+07	0.259411	1		0.016	0.07768	31.82	0.00947027	2	786.447	0.186596	28.7561	0
P08865	40S ribosomal protein SA OS=Homo sapiens GN=RPSA PE=1 SV=4 - [RSSA_HUMAN]	40.13	4.41	1	1	1	1	2.92009e+07				295	32.8334	4.86865
	A2	Sequence	# PSMs	# Proteins	# Protein Groups	Protein Group Accessions	Modifications	ΔCn	Area	(Medium+Heavy)/Light	(Medium+Heavy)/Light Count	(Medium+Heavy)/Light Variability [%]	q-Value	PEP	IonScore	Exp Value	Charge	MH+ [Da]	ΔM [ppm]	RT [min]	# Missed Cleavages
	High	FAAATGATPIAGR	1	1	1	P08865		0	2.92009e+07				0	0.006589	40.13	0.001514	2	1203.65	5.47448	44.1363	0
P36542	ATP synthase subunit gamma, mitochondrial OS=Homo sapiens GN=ATP5C1 PE=1 SV=1 - [ATPG_HUMAN]	39.8	3.69	1	1	1	1	2.83996e+07				298	32.9753	9.21729
	A2	Sequence	# PSMs	# Proteins	# Protein Groups	Protein Group Accessions	Modifications	ΔCn	Area	(Medium+Heavy)/Light	(Medium+Heavy)/Light Count	(Medium+Heavy)/Light Variability [%]	q-Value	PEP	IonScore	Exp Value	Charge	MH+ [Da]	ΔM [ppm]	RT [min]	# Missed Cleavages
	High	SEVATLTAAGK	1	1	1	P36542		0	2.83996e+07				0	0.0006153	39.8	0.00162305	2	1047.57	0.505756	40.5522	0
O94772	Lymphocyte antigen 6H OS=Homo sapiens GN=LY6H PE=2 SV=1 - [LY6H_HUMAN]	39.8	5.71	1	1	1	1	5.17374e+07	0.411898	1		140	14.6591	7.25439
	A2	Sequence	# PSMs	# Proteins	# Protein Groups	Protein Group Accessions	Modifications	ΔCn	Area	(Medium+Heavy)/Light	(Medium+Heavy)/Light Count	(Medium+Heavy)/Light Variability [%]	q-Value	PEP	IonScore	Exp Value	Charge	MH+ [Da]	ΔM [ppm]	RT [min]	# Missed Cleavages
	Medium	ITDPSSSR	1	1	1	O94772		0	5.17374e+07	0.411898	1		0.027	0.1457	39.8	0.00147645	2	862.426	-0.0951962	22.7724	0
Q92777	Synapsin-2 OS=Homo sapiens GN=SYN2 PE=1 SV=3 - [SYN2_HUMAN]	39.52	1.2	1	1	1	1	37306242				582	62.8076	8.41162
	A2	Sequence	# PSMs	# Proteins	# Protein Groups	Protein Group Accessions	Modifications	ΔCn	Area	(Medium+Heavy)/Light	(Medium+Heavy)/Light Count	(Medium+Heavy)/Light Variability [%]	q-Value	PEP	IonScore	Exp Value	Charge	MH+ [Da]	ΔM [ppm]	RT [min]	# Missed Cleavages
	Medium	mNQLLSR	1	1	1	Q92777	M1(Oxidation)	0	37306242				0.022	0.1087	39.52	0.00223931	2	877.455	-0.782303	35.4718	0
P10515	Dihydrolipoyllysine-residue acetyltransferase component of pyruvate dehydrogenase complex, mitochondrial OS=Homo sapiens GN=DLAT PE=1 SV=3 - [ODP2_HUMAN]	39.32	1.24	1	1	1	1	2.13351e+07				647	68.9531	7.84033
	A2	Sequence	# PSMs	# Proteins	# Protein Groups	Protein Group Accessions	Modifications	ΔCn	Area	(Medium+Heavy)/Light	(Medium+Heavy)/Light Count	(Medium+Heavy)/Light Variability [%]	q-Value	PEP	IonScore	Exp Value	Charge	MH+ [Da]	ΔM [ppm]	RT [min]	# Missed Cleavages
	Medium	ILVAEGTR	1	1	1	P10515		0	2.13351e+07				0.025	0.1262	39.32	0.00178349	2	858.504	-0.296266	37.0694	0
P02686	Myelin basic protein OS=Homo sapiens GN=MBP PE=1 SV=3 - [MBP_HUMAN]	39.0509	8.55	1	3	3	3	107032868	0.819304	1		304	33.0973	9.78857
	A2	Sequence	# PSMs	# Proteins	# Protein Groups	Protein Group Accessions	Modifications	ΔCn	Area	(Medium+Heavy)/Light	(Medium+Heavy)/Light Count	(Medium+Heavy)/Light Variability [%]	q-Value	PEP	IonScore	Exp Value	Charge	MH+ [Da]	ΔM [ppm]	RT [min]	# Missed Cleavages
	High	GVDAQGTLSK	1	1	1	P02686		0	107032868	0.819304	1		0	0.003255	44.32	0.000545497	2	975.51	-0.432456	30.4254	0
	Medium	HGFLPR	1	1	1	P02686		0	0				0.032	0.1826	13.58	0.385907	2	726.405	-0.0174636	49.4597	0
	Medium	DTGILDSIGr	1	1	1	P02686	C-Term(Label:18O(1))	0	0				0.042	0.2321	16.11	0.393075	2	1048.55	0.311279	58.9124	0
P50990	T-complex protein 1 subunit theta OS=Homo sapiens GN=CCT8 PE=1 SV=4 - [TCPQ_HUMAN]	38.82	5.29	1	2	2	2	8.96884e+06				548	59.5825	5.60498
	A2	Sequence	# PSMs	# Proteins	# Protein Groups	Protein Group Accessions	Modifications	ΔCn	Area	(Medium+Heavy)/Light	(Medium+Heavy)/Light Count	(Medium+Heavy)/Light Variability [%]	q-Value	PEP	IonScore	Exp Value	Charge	MH+ [Da]	ΔM [ppm]	RT [min]	# Missed Cleavages
	High	AIADTGANVVVTGGK	1	1	1	P50990		0	5.43341e+06				0	0.0007235	38.82	0.00125971	2	1372.74	1.02214	45.4551	0
	High	LVPGGGATEIELAK	1	1	1	P50990		0	1.25043e+07				0.001	0.03435	10.96	0.569191	2	1354.76	-0.00241487	55.8619	0
Q9H1K4	Mitochondrial glutamate carrier 2 OS=Homo sapiens GN=SLC25A18 PE=2 SV=1 - [GHC2_HUMAN]	38.58	2.54	2	1	1	1	48343815	0.579204	1		315	33.8265	9.24658
	A2	Sequence	# PSMs	# Proteins	# Protein Groups	Protein Group Accessions	Modifications	ΔCn	Area	(Medium+Heavy)/Light	(Medium+Heavy)/Light Count	(Medium+Heavy)/Light Variability [%]	q-Value	PEP	IonScore	Exp Value	Charge	MH+ [Da]	ΔM [ppm]	RT [min]	# Missed Cleavages
	High	IQLQDAGR	1	2	1	Q9H1K4		0	48343815	0.579204	1		0.003	0.05468	38.58	0.00141449	2	900.489	-0.821808	35.8551	0
Q99523	Sortilin OS=Homo sapiens GN=SORT1 PE=1 SV=3 - [SORT_HUMAN]	38.55	1.44	1	1	1	1	1.02485e+07				831	92.0095	5.74463
	A2	Sequence	# PSMs	# Proteins	# Protein Groups	Protein Group Accessions	Modifications	ΔCn	Area	(Medium+Heavy)/Light	(Medium+Heavy)/Light Count	(Medium+Heavy)/Light Variability [%]	q-Value	PEP	IonScore	Exp Value	Charge	MH+ [Da]	ΔM [ppm]	RT [min]	# Missed Cleavages
	High	VVLTAEVSGGSR	1	1	1	Q99523		0	1.02485e+07				0	0.0195	38.55	0.00170357	2	1174.65	3.26964	44.2832	0
P35232	Prohibitin OS=Homo sapiens GN=PHB PE=1 SV=1 - [PHB_HUMAN]	38.33	3.31	1	1	1	2	1.02189e+07				272	29.7859	5.75732
	A2	Sequence	# PSMs	# Proteins	# Protein Groups	Protein Group Accessions	Modifications	ΔCn	Area	(Medium+Heavy)/Light	(Medium+Heavy)/Light Count	(Medium+Heavy)/Light Variability [%]	q-Value	PEP	IonScore	Exp Value	Charge	MH+ [Da]	ΔM [ppm]	RT [min]	# Missed Cleavages
	Medium	QVAQQEAER	2	1	1	P35232		0	1.02189e+07				0.022	0.1141	20.92	0.0845505	2	1058.52	-1.54903	21.498	0
P0C0S5	Histone H2A.Z OS=Homo sapiens GN=H2AFZ PE=1 SV=2 - [H2AZ_HUMAN]	38.25	7.03	15	1	1	3	1.8928e+08				128	13.5446	10.5796
	A2	Sequence	# PSMs	# Proteins	# Protein Groups	Protein Group Accessions	Modifications	ΔCn	Area	(Medium+Heavy)/Light	(Medium+Heavy)/Light Count	(Medium+Heavy)/Light Variability [%]	q-Value	PEP	IonScore	Exp Value	Charge	MH+ [Da]	ΔM [ppm]	RT [min]	# Missed Cleavages
	High	AGLQFPVGR	3	15	1	P0C0S5		0	1.8928e+08				0	0.003539	38.25	0.00212465	2	944.532	0.404973	57.383	0
P62942	Peptidyl-prolyl cis-trans isomerase FKBP1A OS=Homo sapiens GN=FKBP1A PE=1 SV=2 - [FKB1A_HUMAN]	38	12.04	1	1	1	1	2.44938e+07				108	11.9431	8.1626
	A2	Sequence	# PSMs	# Proteins	# Protein Groups	Protein Group Accessions	Modifications	ΔCn	Area	(Medium+Heavy)/Light	(Medium+Heavy)/Light Count	(Medium+Heavy)/Light Variability [%]	q-Value	PEP	IonScore	Exp Value	Charge	MH+ [Da]	ΔM [ppm]	RT [min]	# Missed Cleavages
	High	GVQVETISPGDGR	1	1	1	P62942		0	2.44938e+07				0	0.0006615	38	0.00197319	2	1314.67	0.241454	43.3416	0
O94811	Tubulin polymerization-promoting protein OS=Homo sapiens GN=TPPP PE=1 SV=1 - [TPPP_HUMAN]	37.94	4.11	1	1	1	1	44458660	0.49834	1		219	23.6792	9.43701
	A2	Sequence	# PSMs	# Proteins	# Protein Groups	Protein Group Accessions	Modifications	ΔCn	Area	(Medium+Heavy)/Light	(Medium+Heavy)/Light Count	(Medium+Heavy)/Light Variability [%]	q-Value	PEP	IonScore	Exp Value	Charge	MH+ [Da]	ΔM [ppm]	RT [min]	# Missed Cleavages
	High	AISSPTVSR	1	1	1	O94811		0	44458660	0.49834	1		0	0.02626	37.94	0.00289249	2	917.501	-4.58769	33.033	0
P49418	Amphiphysin OS=Homo sapiens GN=AMPH PE=1 SV=1 - [AMPH_HUMAN]	37.89	3.31	3	2	2	2	1.57318e+07	0.256461	1		695	76.21	4.64014
	A2	Sequence	# PSMs	# Proteins	# Protein Groups	Protein Group Accessions	Modifications	ΔCn	Area	(Medium+Heavy)/Light	(Medium+Heavy)/Light Count	(Medium+Heavy)/Light Variability [%]	q-Value	PEP	IonScore	Exp Value	Charge	MH+ [Da]	ΔM [ppm]	RT [min]	# Missed Cleavages
	High	ATVPAGEGVSLEEAK	1	1	1	P49418		0	2.10087e+07	0.256461	1		0	0.002991	25.58	0.0379071	2	1457.75	1.03046	47.8515	0
	Medium	LVDYDSAR	1	3	1	P49418		0	1.0455e+07				0.023	0.1195	30.31	0.0119647	2	938.459	1.22503	35.4931	0
Q9P2R7	Succinyl-CoA ligase [ADP-forming] subunit beta, mitochondrial OS=Homo sapiens GN=SUCLA2 PE=1 SV=3 - [SUCB1_HUMAN]	37.82	1.73	1	1	1	1	11823561	0.392381	1		463	50.2852	7.41553
	A2	Sequence	# PSMs	# Proteins	# Protein Groups	Protein Group Accessions	Modifications	ΔCn	Area	(Medium+Heavy)/Light	(Medium+Heavy)/Light Count	(Medium+Heavy)/Light Variability [%]	q-Value	PEP	IonScore	Exp Value	Charge	MH+ [Da]	ΔM [ppm]	RT [min]	# Missed Cleavages
	Medium	AQVLAGGR	1	1	1	Q9P2R7		0	11823561	0.392381	1		0.04	0.2186	37.82	0.00169326	2	771.447	-0.817293	27.9727	0
P27797	Calreticulin OS=Homo sapiens GN=CALR PE=1 SV=1 - [CALR_HUMAN]	37.82	4.08	1	2	2	2	1.81544e+07	0.52926	1		417	48.1118	4.43701
	A2	Sequence	# PSMs	# Proteins	# Protein Groups	Protein Group Accessions	Modifications	ΔCn	Area	(Medium+Heavy)/Light	(Medium+Heavy)/Light Count	(Medium+Heavy)/Light Variability [%]	q-Value	PEP	IonScore	Exp Value	Charge	MH+ [Da]	ΔM [ppm]	RT [min]	# Missed Cleavages
	High	GLQTSQDAR	1	1	1	P27797		0	23522222	0.52926	1		0	0.01913	36.69	0.00250718	2	975.486	0.770199	23.4211	0
	High	QIDNPDYK	1	1	1	P27797		0	1.27865e+07				0.003	0.0483	17.13	0.203324	2	992.468	-0.503017	31.2395	0
O94925	Glutaminase kidney isoform, mitochondrial OS=Homo sapiens GN=GLS PE=1 SV=1 - [GLSK_HUMAN]	37.77	1.2	1	1	1	1	3.37832e+07				669	73.4139	7.76709
	A2	Sequence	# PSMs	# Proteins	# Protein Groups	Protein Group Accessions	Modifications	ΔCn	Area	(Medium+Heavy)/Light	(Medium+Heavy)/Light Count	(Medium+Heavy)/Light Variability [%]	q-Value	PEP	IonScore	Exp Value	Charge	MH+ [Da]	ΔM [ppm]	RT [min]	# Missed Cleavages
	High	VLSPEAVR	1	1	1	O94925		0	3.37832e+07				0	0.006845	37.77	0.0014622	2	870.505	0.128506	39.8825	0
Q9UMF0	Intercellular adhesion molecule 5 OS=Homo sapiens GN=ICAM5 PE=1 SV=3 - [ICAM5_HUMAN]	37.58	1.73	1	2	2	2	4.72976e+06	0.399882	1		924	97.0557	5.94775
	A2	Sequence	# PSMs	# Proteins	# Protein Groups	Protein Group Accessions	Modifications	ΔCn	Area	(Medium+Heavy)/Light	(Medium+Heavy)/Light Count	(Medium+Heavy)/Light Variability [%]	q-Value	PEP	IonScore	Exp Value	Charge	MH+ [Da]	ΔM [ppm]	RT [min]	# Missed Cleavages
	High	TFSLSPDAPR	1	1	1	Q9UMF0		0	6.19996e+06				0	0.01239	37.58	0.00287188	2	1090.55	-1.47287	51.9584	0
	Medium	VAFVER	1	1	1	Q9UMF0		0	3.25956e+06	0.399882	1		0.022	0.09811	26.32	0.0568197	2	720.404	-0.202862	38.7123	0
P62753	40S ribosomal protein S6 OS=Homo sapiens GN=RPS6 PE=1 SV=1 - [RS6_HUMAN]	37.48	4.82	1	1	1	1	3.1955e+06				249	28.663	10.8433
	A2	Sequence	# PSMs	# Proteins	# Protein Groups	Protein Group Accessions	Modifications	ΔCn	Area	(Medium+Heavy)/Light	(Medium+Heavy)/Light Count	(Medium+Heavy)/Light Variability [%]	q-Value	PEP	IonScore	Exp Value	Charge	MH+ [Da]	ΔM [ppm]	RT [min]	# Missed Cleavages
	High	DIPGLTDTTVPR	1	1	1	P62753		0	3.1955e+06				0	0.0041	37.48	0.00207233	2	1284.68	2.10574	58.4493	0
P27816	Microtubule-associated protein 4 OS=Homo sapiens GN=MAP4 PE=1 SV=3 - [MAP4_HUMAN]	37.48	1.3	1	1	1	1	2.00109e+07				1152	120.93	5.42725
	A2	Sequence	# PSMs	# Proteins	# Protein Groups	Protein Group Accessions	Modifications	ΔCn	Area	(Medium+Heavy)/Light	(Medium+Heavy)/Light Count	(Medium+Heavy)/Light Variability [%]	q-Value	PEP	IonScore	Exp Value	Charge	MH+ [Da]	ΔM [ppm]	RT [min]	# Missed Cleavages
	High	TTTAAAVASTGPSSR	1	1	1	P27816		0	2.00109e+07				0	0.0002585	37.48	0.00258147	2	1377.7	-0.239892	32.7966	0
Q15366	Poly(rC)-binding protein 2 OS=Homo sapiens GN=PCBP2 PE=1 SV=1 - [PCBP2_HUMAN]	37.36	3.01	1	1	1	1	4.36522e+07				365	38.5556	6.78564
	A2	Sequence	# PSMs	# Proteins	# Protein Groups	Protein Group Accessions	Modifications	ΔCn	Area	(Medium+Heavy)/Light	(Medium+Heavy)/Light Count	(Medium+Heavy)/Light Variability [%]	q-Value	PEP	IonScore	Exp Value	Charge	MH+ [Da]	ΔM [ppm]	RT [min]	# Missed Cleavages
	High	IANPVEGSTDR	1	1	1	Q15366		0	4.36522e+07				0	0.01305	37.36	0.00219466	2	1158.58	0.208542	37.0517	0
Q99497	Protein DJ-1 OS=Homo sapiens GN=PARK7 PE=1 SV=2 - [PARK7_HUMAN]	37.3497	7.41	1	2	2	2	3.11954e+07				189	19.8785	6.78564
	A2	Sequence	# PSMs	# Proteins	# Protein Groups	Protein Group Accessions	Modifications	ΔCn	Area	(Medium+Heavy)/Light	(Medium+Heavy)/Light Count	(Medium+Heavy)/Light Variability [%]	q-Value	PEP	IonScore	Exp Value	Charge	MH+ [Da]	ΔM [ppm]	RT [min]	# Missed Cleavages
	Medium	APLVLKD	1	1	1	Q99497		0	5.21552e+07				0.016	0.07918	32.3	0.00291478	2	755.466	0.111001	43.7459	1
	Medium	ALVILAK	1	1	1	Q99497		0	1.02356e+07				0.036	0.197	21.06	0.0156686	2	727.507	-0.509298	53.8124	0
P18124	60S ribosomal protein L7 OS=Homo sapiens GN=RPL7 PE=1 SV=1 - [RL7_HUMAN]	37.34	4.44	1	1	1	1	8537227				248	29.2072	10.6528
	A2	Sequence	# PSMs	# Proteins	# Protein Groups	Protein Group Accessions	Modifications	ΔCn	Area	(Medium+Heavy)/Light	(Medium+Heavy)/Light Count	(Medium+Heavy)/Light Variability [%]	q-Value	PEP	IonScore	Exp Value	Charge	MH+ [Da]	ΔM [ppm]	RT [min]	# Missed Cleavages
	High	IALTDNALIAR	1	1	1	P18124		0	8537227				0	0.002984	37.34	0.000977858	2	1170.69	1.43276	60.7499	0
Q08211	ATP-dependent RNA helicase A OS=Homo sapiens GN=DHX9 PE=1 SV=4 - [DHX9_HUMAN]	36.8796	2.36	1	4	4	5	9.75556e+06	0.0533725	2	18.7838	1270	140.869	6.84424
	A2	Sequence	# PSMs	# Proteins	# Protein Groups	Protein Group Accessions	Modifications	ΔCn	Area	(Medium+Heavy)/Light	(Medium+Heavy)/Light Count	(Medium+Heavy)/Light Variability [%]	q-Value	PEP	IonScore	Exp Value	Charge	MH+ [Da]	ΔM [ppm]	RT [min]	# Missed Cleavages
	Medium	LPIEPR	2	1	1	Q08211		0	5.10969e+06	0.0470729	1		0.016	0.07719	26.52	0.0103622	2	724.434	-1.45028	39.8856	0
	Medium	ILTTEGR	1	1	1	Q08211		0	1.88498e+07	0.0605152	1		0.023	0.1228	31.92	0.0115684	2	789.448	2.45943	29.6485	0
	Medium	ISAVSVAER	1	1	1	Q08211		0	5.30722e+06				0.031	0.1641	21.02	0.152996	2	931.524	3.69955	39.8278	0
	Medium	mTPSYEIR	1	1	1	Q08211	M1(Oxidation)	0	2.28819e+06				0.048	0.2552	10.08	1.03574	2	1012.48	1.2135	39.8025	0
O95741	Copine-6 OS=Homo sapiens GN=CPNE6 PE=1 SV=3 - [CPNE6_HUMAN]	36.06	1.26	1	1	1	1	17016348	0.129117	1		557	61.9517	5.51611
	A2	Sequence	# PSMs	# Proteins	# Protein Groups	Protein Group Accessions	Modifications	ΔCn	Area	(Medium+Heavy)/Light	(Medium+Heavy)/Light Count	(Medium+Heavy)/Light Variability [%]	q-Value	PEP	IonScore	Exp Value	Charge	MH+ [Da]	ΔM [ppm]	RT [min]	# Missed Cleavages
	High	VAEPAQR	1	1	1	O95741		0	17016348	0.129117	1		0.003	0.03655	36.06	0.00357987	2	770.416	0.638517	20.5678	0
Q8WXF1	Paraspeckle component 1 OS=Homo sapiens GN=PSPC1 PE=1 SV=1 - [PSPC1_HUMAN]	36.05	1.53	1	1	1	1	1.62296e+07				523	58.7062	6.66846
	A2	Sequence	# PSMs	# Proteins	# Protein Groups	Protein Group Accessions	Modifications	ΔCn	Area	(Medium+Heavy)/Light	(Medium+Heavy)/Light Count	(Medium+Heavy)/Light Variability [%]	q-Value	PEP	IonScore	Exp Value	Charge	MH+ [Da]	ΔM [ppm]	RT [min]	# Missed Cleavages
	High	AVVVVDDR	1	1	1	Q8WXF1		0	1.62296e+07				0	0.01367	36.05	0.00343914	2	872.485	1.36225	36.6362	0
O95292	Vesicle-associated membrane protein-associated protein B/C OS=Homo sapiens GN=VAPB PE=1 SV=3 - [VAPB_HUMAN]	36.04	2.88	1	1	1	1	8.56059e+06				243	27.2111	7.29834
	A2	Sequence	# PSMs	# Proteins	# Protein Groups	Protein Group Accessions	Modifications	ΔCn	Area	(Medium+Heavy)/Light	(Medium+Heavy)/Light Count	(Medium+Heavy)/Light Variability [%]	q-Value	PEP	IonScore	Exp Value	Charge	MH+ [Da]	ΔM [ppm]	RT [min]	# Missed Cleavages
	Medium	LQGEVQR	1	1	1	O95292		0	8.56059e+06				0.023	0.1153	36.04	0.00293685	2	829.452	-0.511456	24.3186	0
P61978	Heterogeneous nuclear ribonucleoprotein K OS=Homo sapiens GN=HNRNPK PE=1 SV=1 - [HNRPK_HUMAN]	35.96	7.99	1	4	4	4	2.66075e+07				463	50.9444	5.5415
	A2	Sequence	# PSMs	# Proteins	# Protein Groups	Protein Group Accessions	Modifications	ΔCn	Area	(Medium+Heavy)/Light	(Medium+Heavy)/Light Count	(Medium+Heavy)/Light Variability [%]	q-Value	PEP	IonScore	Exp Value	Charge	MH+ [Da]	ΔM [ppm]	RT [min]	# Missed Cleavages
	High	GGDLmAYDR	1	1	1	P61978	M5(Oxidation)	0	8.59142e+06				0	0.0186	27.28	0.00692152	2	1013.44	1.49602	35.7699	0
	High	IDEPLEGSEDR	1	1	1	P61978		0	1.61794e+07				0.007	0.06715	22.68	0.0321009	2	1259.57	-3.25575	40.1142	0
	Medium	NAGAVIGK	1	1	1	P61978		0	3.27138e+07				0.022	0.09625	10.96	1.20252	2	729.425	-0.0132945	27.5775	0
	Medium	DLAGSIIGK	1	1	1	P61978		0	3.09293e+07				0.032	0.1803	21.95	0.101484	2	873.504	-0.192886	54.1718	0
P30044	Peroxiredoxin-5, mitochondrial OS=Homo sapiens GN=PRDX5 PE=1 SV=4 - [PRDX5_HUMAN]	35.95	5.14	1	1	1	1	5.70897e+06	1.83895	1		214	22.0725	8.70459
	A2	Sequence	# PSMs	# Proteins	# Protein Groups	Protein Group Accessions	Modifications	ΔCn	Area	(Medium+Heavy)/Light	(Medium+Heavy)/Light Count	(Medium+Heavy)/Light Variability [%]	q-Value	PEP	IonScore	Exp Value	Charge	MH+ [Da]	ΔM [ppm]	RT [min]	# Missed Cleavages
	High	LLADPTGAFGK	1	1	1	P30044		0	5.70897e+06	1.83895	1		0	0.02396	35.95	0.00414179	2	1089.59	0.755199	56.2475	0
Q13200	26S proteasome non-ATPase regulatory subunit 2 OS=Homo sapiens GN=PSMD2 PE=1 SV=3 - [PSMD2_HUMAN]	35.65	1.32	1	1	1	1	4.28539e+06				908	100.136	5.19873
	A2	Sequence	# PSMs	# Proteins	# Protein Groups	Protein Group Accessions	Modifications	ΔCn	Area	(Medium+Heavy)/Light	(Medium+Heavy)/Light Count	(Medium+Heavy)/Light Variability [%]	q-Value	PEP	IonScore	Exp Value	Charge	MH+ [Da]	ΔM [ppm]	RT [min]	# Missed Cleavages
	High	FGGSGSQVDSAR	1	1	1	Q13200		0	4.28539e+06				0	0.008714	35.65	0.00162001	2	1167.54	-2.89605	31.0791	0
P04179	Superoxide dismutase [Mn], mitochondrial OS=Homo sapiens GN=SOD2 PE=1 SV=2 - [SODM_HUMAN]	35.53	6.31	1	1	1	1	9017879	0.454463	1		222	24.7066	8.25049
	A2	Sequence	# PSMs	# Proteins	# Protein Groups	Protein Group Accessions	Modifications	ΔCn	Area	(Medium+Heavy)/Light	(Medium+Heavy)/Light Count	(Medium+Heavy)/Light Variability [%]	q-Value	PEP	IonScore	Exp Value	Charge	MH+ [Da]	ΔM [ppm]	RT [min]	# Missed Cleavages
	High	GDVTAQIALQPALK	1	1	1	P04179		0	9017879	0.454463	1		0	0.001906	35.53	0.00142748	2	1424.81	0.947555	60.1925	0
Q92499	ATP-dependent RNA helicase DDX1 OS=Homo sapiens GN=DDX1 PE=1 SV=2 - [DDX1_HUMAN]	34.85	1.08	1	1	1	1	2.9757e+06				740	82.3798	7.2251
	A2	Sequence	# PSMs	# Proteins	# Protein Groups	Protein Group Accessions	Modifications	ΔCn	Area	(Medium+Heavy)/Light	(Medium+Heavy)/Light Count	(Medium+Heavy)/Light Variability [%]	q-Value	PEP	IonScore	Exp Value	Charge	MH+ [Da]	ΔM [ppm]	RT [min]	# Missed Cleavages
	Medium	ALIVEPSR	1	1	1	Q92499		0	2.9757e+06				0.027	0.1374	34.85	0.0029297	2	884.518	-2.73095	43.7374	0
P61421	V-type proton ATPase subunit d 1 OS=Homo sapiens GN=ATP6V0D1 PE=1 SV=1 - [VA0D1_HUMAN]	34.8	3.7	1	1	1	1	7.80232e+06	0.589529	1		351	40.3032	4.99561
	A2	Sequence	# PSMs	# Proteins	# Protein Groups	Protein Group Accessions	Modifications	ΔCn	Area	(Medium+Heavy)/Light	(Medium+Heavy)/Light Count	(Medium+Heavy)/Light Variability [%]	q-Value	PEP	IonScore	Exp Value	Charge	MH+ [Da]	ΔM [ppm]	RT [min]	# Missed Cleavages
	High	LLFEGAGSNPGDK	1	1	1	P61421		0	7.80232e+06	0.589529	1		0	0.01548	34.8	0.00425503	2	1304.65	0.794252	52.672	0
Q8N111	Cell cycle exit and neuronal differentiation protein 1 OS=Homo sapiens GN=CEND1 PE=2 SV=1 - [CEND_HUMAN]	34.7867	15.44	1	2	2	3	5.12049e+07	0.588795	1		149	14.9448	9.20264
	A2	Sequence	# PSMs	# Proteins	# Protein Groups	Protein Group Accessions	Modifications	ΔCn	Area	(Medium+Heavy)/Light	(Medium+Heavy)/Light Count	(Medium+Heavy)/Light Variability [%]	q-Value	PEP	IonScore	Exp Value	Charge	MH+ [Da]	ΔM [ppm]	RT [min]	# Missed Cleavages
	High	QQPPAAPTTAPAKK	2	1	1	Q8N111		0	3.37254e+07				0	0.0004141	24.53	0.0336514	3	1405.78	-0.724548	29.9885	1
	High	VPQVTTEAK	1	1	1	Q8N111		0	68684386	0.588795	1		0.003	0.0498	15.94	0.320901	2	972.536	0.10191	31.8501	0
P00367	Glutamate dehydrogenase 1, mitochondrial OS=Homo sapiens GN=GLUD1 PE=1 SV=2 - [DHE3_HUMAN]	34.74	1.97	2	1	1	1	1.32192e+07				558	61.3592	7.79639
	A2	Sequence	# PSMs	# Proteins	# Protein Groups	Protein Group Accessions	Modifications	ΔCn	Area	(Medium+Heavy)/Light	(Medium+Heavy)/Light Count	(Medium+Heavy)/Light Variability [%]	q-Value	PEP	IonScore	Exp Value	Charge	MH+ [Da]	ΔM [ppm]	RT [min]	# Missed Cleavages
	High	YSTDVSVDEVK	1	2	1	P00367		0	1.32192e+07				0	0.0163	34.74	0.00288734	2	1241.59	1.48758	44.6058	0
Q92686	Neurogranin OS=Homo sapiens GN=NRGN PE=1 SV=1 - [NEUG_HUMAN]	34.5	19.23	1	1	1	1	1.21937e+07				78	7.61366	7.86963
	A2	Sequence	# PSMs	# Proteins	# Protein Groups	Protein Group Accessions	Modifications	ΔCn	Area	(Medium+Heavy)/Light	(Medium+Heavy)/Light Count	(Medium+Heavy)/Light Variability [%]	q-Value	PEP	IonScore	Exp Value	Charge	MH+ [Da]	ΔM [ppm]	RT [min]	# Missed Cleavages
	High	KGPGPGGPGGAGVAR	1	1	1	Q92686		0	1.21937e+07				0	0.001996	34.5	0.00565927	3	1234.67	1.28853	31.2088	1
Q9H4G0	Band 4.1-like protein 1 OS=Homo sapiens GN=EPB41L1 PE=1 SV=2 - [E41L1_HUMAN]	34.46	1.02	1	1	1	1	158645				881	98.4422	5.61768
	A2	Sequence	# PSMs	# Proteins	# Protein Groups	Protein Group Accessions	Modifications	ΔCn	Area	(Medium+Heavy)/Light	(Medium+Heavy)/Light Count	(Medium+Heavy)/Light Variability [%]	q-Value	PEP	IonScore	Exp Value	Charge	MH+ [Da]	ΔM [ppm]	RT [min]	# Missed Cleavages
	High	ETDPSPEER	1	1	1	Q9H4G0		0	158645				0	0.01395	34.46	0.00109219	2	1059.46	-0.50939	23.8639	0
Q9BPW8	Protein NipSnap homolog 1 OS=Homo sapiens GN=NIPSNAP1 PE=1 SV=1 - [NIPS1_HUMAN]	34.01	2.11	2	1	1	1	2.03221e+07	0.436515	1		284	33.2888	9.30518
	A2	Sequence	# PSMs	# Proteins	# Protein Groups	Protein Group Accessions	Modifications	ΔCn	Area	(Medium+Heavy)/Light	(Medium+Heavy)/Light Count	(Medium+Heavy)/Light Variability [%]	q-Value	PEP	IonScore	Exp Value	Charge	MH+ [Da]	ΔM [ppm]	RT [min]	# Missed Cleavages
	Medium	ImIPLK	1	2	1	Q9BPW8	M2(Oxidation)	0	2.03221e+07	0.436515	1		0.01	0.06876	34.01	0.0039322	2	730.453	0.120978	52.6039	0
O95502	Neuronal pentraxin receptor OS=Homo sapiens GN=NPTXR PE=2 SV=2 - [NPTXR_HUMAN]	33.98	1.6	1	1	1	2	5.36129e+06				500	52.8132	6.21436
	A2	Sequence	# PSMs	# Proteins	# Protein Groups	Protein Group Accessions	Modifications	ΔCn	Area	(Medium+Heavy)/Light	(Medium+Heavy)/Light Count	(Medium+Heavy)/Light Variability [%]	q-Value	PEP	IonScore	Exp Value	Charge	MH+ [Da]	ΔM [ppm]	RT [min]	# Missed Cleavages
	High	GLQGAGPR	2	1	1	O95502		0	5.36129e+06				0.003	0.04184	28.16	0.0192473	2	755.416	0.0395192	26.139	0
P05026	Sodium/potassium-transporting ATPase subunit beta-1 OS=Homo sapiens GN=ATP1B1 PE=1 SV=1 - [AT1B1_HUMAN]	33.9	4.62	1	1	1	1	76887488				303	35.0389	8.52881
	A2	Sequence	# PSMs	# Proteins	# Protein Groups	Protein Group Accessions	Modifications	ΔCn	Area	(Medium+Heavy)/Light	(Medium+Heavy)/Light Count	(Medium+Heavy)/Light Variability [%]	q-Value	PEP	IonScore	Exp Value	Charge	MH+ [Da]	ΔM [ppm]	RT [min]	# Missed Cleavages
	High	VAPPGLTQIPQIQK	1	1	1	P05026		0	76887488				0	0.0004819	33.9	0.0011203	2	1489.87	0.289828	61.819	0
P30084	Enoyl-CoA hydratase, mitochondrial OS=Homo sapiens GN=ECHS1 PE=1 SV=4 - [ECHM_HUMAN]	33.75	6.55	1	2	2	2	6.78725e+06	0.241801	1		290	31.3671	8.07471
	A2	Sequence	# PSMs	# Proteins	# Protein Groups	Protein Group Accessions	Modifications	ΔCn	Area	(Medium+Heavy)/Light	(Medium+Heavy)/Light Count	(Medium+Heavy)/Light Variability [%]	q-Value	PEP	IonScore	Exp Value	Charge	MH+ [Da]	ΔM [ppm]	RT [min]	# Missed Cleavages
	Medium	ISAQDAK	1	1	1	P30084		0	1.17223e+07	0.241801	1		0.012	0.07172	33.75	0.0100785	2	732.389	-0.197889	19.8831	0
	Medium	SLAmEmVLTGDR	1	1	1	P30084	M4(Oxidation); M6(Oxidation)	0	1.85216e+06				0.026	0.1305	10.76	0.675765	2	1354.63	-1.89122	47.8531	0
Q9NYI0	PH and SEC7 domain-containing protein 3 OS=Homo sapiens GN=PSD3 PE=1 SV=2 - [PSD3_HUMAN]	33.15	0.76	1	1	1	1	5.14319e+06				1048	115.962	5.98584
	A2	Sequence	# PSMs	# Proteins	# Protein Groups	Protein Group Accessions	Modifications	ΔCn	Area	(Medium+Heavy)/Light	(Medium+Heavy)/Light Count	(Medium+Heavy)/Light Variability [%]	q-Value	PEP	IonScore	Exp Value	Charge	MH+ [Da]	ΔM [ppm]	RT [min]	# Missed Cleavages
	High	LSQEEQLK	1	1	1	Q9NYI0		0	5.14319e+06				0	0.01614	33.15	0.00779518	2	974.518	2.2189	30.8968	0
O00154	Cytosolic acyl coenzyme A thioester hydrolase OS=Homo sapiens GN=ACOT7 PE=1 SV=3 - [BACH_HUMAN]	32.58	3.16	1	1	1	1	2.91145e+06	0.72552	1		380	41.7693	8.54346
	A2	Sequence	# PSMs	# Proteins	# Protein Groups	Protein Group Accessions	Modifications	ΔCn	Area	(Medium+Heavy)/Light	(Medium+Heavy)/Light Count	(Medium+Heavy)/Light Variability [%]	q-Value	PEP	IonScore	Exp Value	Charge	MH+ [Da]	ΔM [ppm]	RT [min]	# Missed Cleavages
	High	mIEEAGAIISTR	1	1	1	O00154	M1(Oxidation)	0	2.91145e+06	0.72552	1		0	0.01219	32.58	0.00974417	2	1306.67	1.83441	51.0863	0
Q9UBT2	SUMO-activating enzyme subunit 2 OS=Homo sapiens GN=UBA2 PE=1 SV=2 - [SAE2_HUMAN]	32.32	1.56	1	1	1	1	4.45248e+06				640	71.1792	5.2876
	A2	Sequence	# PSMs	# Proteins	# Protein Groups	Protein Group Accessions	Modifications	ΔCn	Area	(Medium+Heavy)/Light	(Medium+Heavy)/Light Count	(Medium+Heavy)/Light Variability [%]	q-Value	PEP	IonScore	Exp Value	Charge	MH+ [Da]	ΔM [ppm]	RT [min]	# Missed Cleavages
	High	ELAEAVAGGR	1	1	1	Q9UBT2		0	4.45248e+06				0	0.001422	32.32	0.00715089	2	972.511	0.273243	37.3022	0
Q02978	Mitochondrial 2-oxoglutarate/malate carrier protein OS=Homo sapiens GN=SLC25A11 PE=1 SV=3 - [M2OM_HUMAN]	32.15	7.96	1	2	2	3	5.74387e+06				314	34.0399	9.90576
	A2	Sequence	# PSMs	# Proteins	# Protein Groups	Protein Group Accessions	Modifications	ΔCn	Area	(Medium+Heavy)/Light	(Medium+Heavy)/Light Count	(Medium+Heavy)/Light Variability [%]	q-Value	PEP	IonScore	Exp Value	Charge	MH+ [Da]	ΔM [ppm]	RT [min]	# Missed Cleavages
	High	mQLSGEGAK	2	1	1	Q02978	M1(Oxidation)	0	6.59109e+06				0.003	0.04662	32.15	0.00807636	2	936.447	1.14853	22.0253	0
	Medium	AVVVNAAQLASYSQSK	1	1	1	Q02978		0	4.89666e+06				0.016	0.08199	13.57	0.512066	2	1635.87	1.44438	58.0865	0
P62263	40S ribosomal protein S14 OS=Homo sapiens GN=RPS14 PE=1 SV=3 - [RS14_HUMAN]	31.95	15.89	1	2	2	2	1.08695e+07				151	16.2625	10.0522
	A2	Sequence	# PSMs	# Proteins	# Protein Groups	Protein Group Accessions	Modifications	ΔCn	Area	(Medium+Heavy)/Light	(Medium+Heavy)/Light Count	(Medium+Heavy)/Light Variability [%]	q-Value	PEP	IonScore	Exp Value	Charge	MH+ [Da]	ΔM [ppm]	RT [min]	# Missed Cleavages
	High	TPGPGAQSALR	1	1	1	P62263		0	1.80047e+07				0	0.001899	29.6	0.0162827	2	1054.56	-0.490382	35.0756	0
	High	IEDVTPIPSDSTR	1	1	1	P62263		0	3.73424e+06				0.003	0.04009	15.85	0.306819	2	1429.72	1.27039	46.7691	0
Q9NX14	NADH dehydrogenase [ubiquinone] 1 beta subcomplex subunit 11, mitochondrial OS=Homo sapiens GN=NDUFB11 PE=1 SV=1 - [NDUBB_HUMAN]	31.26	7.19	1	1	1	1	37222614				153	17.3057	5.22412
	A2	Sequence	# PSMs	# Proteins	# Protein Groups	Protein Group Accessions	Modifications	ΔCn	Area	(Medium+Heavy)/Light	(Medium+Heavy)/Light Count	(Medium+Heavy)/Light Variability [%]	q-Value	PEP	IonScore	Exp Value	Charge	MH+ [Da]	ΔM [ppm]	RT [min]	# Missed Cleavages
	High	TVVAPSAVAGK	1	1	1	Q9NX14		0	37222614				0	0.006388	31.26	0.00564868	2	999.586	3.0323	37.2111	0
P32856	Syntaxin-2 OS=Homo sapiens GN=STX2 PE=1 SV=3 - [STX2_HUMAN]	31.05	2.43	3	1	1	2	7.63609e+07	0.143841	1		288	33.3202	6.27783
	A2	Sequence	# PSMs	# Proteins	# Protein Groups	Protein Group Accessions	Modifications	ΔCn	Area	(Medium+Heavy)/Light	(Medium+Heavy)/Light Count	(Medium+Heavy)/Light Variability [%]	q-Value	PEP	IonScore	Exp Value	Charge	MH+ [Da]	ΔM [ppm]	RT [min]	# Missed Cleavages
	High	QLEITGR	2	3	1	P32856		0	7.63609e+07	0.143841	1		0.003	0.04528	31.05	0.0117	2	816.458	0.241121	37.9794	0
P62491	Ras-related protein Rab-11A OS=Homo sapiens GN=RAB11A PE=1 SV=3 - [RB11A_HUMAN]	30.82	3.7	2	1	1	1	1.29434e+07				216	24.3784	6.56592
	A2	Sequence	# PSMs	# Proteins	# Protein Groups	Protein Group Accessions	Modifications	ΔCn	Area	(Medium+Heavy)/Light	(Medium+Heavy)/Light Count	(Medium+Heavy)/Light Variability [%]	q-Value	PEP	IonScore	Exp Value	Charge	MH+ [Da]	ΔM [ppm]	RT [min]	# Missed Cleavages
	High	AVPTDEAR	1	2	1	P62491		0	1.29434e+07				0	0.02277	30.82	0.0111358	2	858.431	-0.561947	24.8109	0
Q96GW7	Brevican core protein OS=Homo sapiens GN=BCAN PE=1 SV=2 - [PGCB_HUMAN]	30.6897	1.76	1	2	2	2	1.45994e+07	1.03189	2	3.00386	911	99.056	4.64014
	A2	Sequence	# PSMs	# Proteins	# Protein Groups	Protein Group Accessions	Modifications	ΔCn	Area	(Medium+Heavy)/Light	(Medium+Heavy)/Light Count	(Medium+Heavy)/Light Variability [%]	q-Value	PEP	IonScore	Exp Value	Charge	MH+ [Da]	ΔM [ppm]	RT [min]	# Missed Cleavages
	Medium	AVLGSPR	1	1	1	Q96GW7		0	2.75031e+07	1.0112	1		0.027	0.1373	33.44	0.00471013	2	699.414	-0.696384	31.2019	0
	Medium	YPIVTPSQR	1	1	1	Q96GW7		0	1.6958e+06	1.053	1		0.027	0.1391	15.84	0.459986	2	1060.58	3.85439	44.122	0
P49207	60S ribosomal protein L34 OS=Homo sapiens GN=RPL34 PE=1 SV=3 - [RL34_HUMAN]	30.6	7.69	1	1	1	1	3407271	0.0869925	1		117	13.2845	11.4731
	A2	Sequence	# PSMs	# Proteins	# Protein Groups	Protein Group Accessions	Modifications	ΔCn	Area	(Medium+Heavy)/Light	(Medium+Heavy)/Light Count	(Medium+Heavy)/Light Variability [%]	q-Value	PEP	IonScore	Exp Value	Charge	MH+ [Da]	ΔM [ppm]	RT [min]	# Missed Cleavages
	High	LSYNTASNK	1	1	1	P49207		0	3407271	0.0869925	1		0	0.004887	30.6	0.0105822	2	997.496	1.03955	29.4436	0
O60313	Dynamin-like 120 kDa protein, mitochondrial OS=Homo sapiens GN=OPA1 PE=1 SV=3 - [OPA1_HUMAN]	30.55	1.15	1	1	1	1	2.08596e+07				960	111.561	7.86963
	A2	Sequence	# PSMs	# Proteins	# Protein Groups	Protein Group Accessions	Modifications	ΔCn	Area	(Medium+Heavy)/Light	(Medium+Heavy)/Light Count	(Medium+Heavy)/Light Variability [%]	q-Value	PEP	IonScore	Exp Value	Charge	MH+ [Da]	ΔM [ppm]	RT [min]	# Missed Cleavages
	High	VVVVGDQSAGK	1	1	1	O60313		0	2.08596e+07				0	0.00151	30.55	0.0125109	2	1058.58	0.386322	33.2657	0
P50213	Isocitrate dehydrogenase [NAD] subunit alpha, mitochondrial OS=Homo sapiens GN=IDH3A PE=1 SV=1 - [IDH3A_HUMAN]	30.49	2.19	1	1	1	1	4.16962e+06				366	39.5661	6.91748
	A2	Sequence	# PSMs	# Proteins	# Protein Groups	Protein Group Accessions	Modifications	ΔCn	Area	(Medium+Heavy)/Light	(Medium+Heavy)/Light Count	(Medium+Heavy)/Light Variability [%]	q-Value	PEP	IonScore	Exp Value	Charge	MH+ [Da]	ΔM [ppm]	RT [min]	# Missed Cleavages
	High	SNVTAVHK	1	1	1	P50213		0	4.16962e+06				0.007	0.0671	30.49	0.0120596	2	855.468	-0.370742	21.6812	0
Q13423	NAD(P) transhydrogenase, mitochondrial OS=Homo sapiens GN=NNT PE=1 SV=3 - [NNTM_HUMAN]	30.39	2.39	1	3	3	3	1.69989e+07	0.513953	1		1086	113.823	8.08936
	A2	Sequence	# PSMs	# Proteins	# Protein Groups	Protein Group Accessions	Modifications	ΔCn	Area	(Medium+Heavy)/Light	(Medium+Heavy)/Light Count	(Medium+Heavy)/Light Variability [%]	q-Value	PEP	IonScore	Exp Value	Charge	MH+ [Da]	ΔM [ppm]	RT [min]	# Missed Cleavages
	High	VAGAQIQGAK	1	1	1	Q13423		0	32184710				0	0.01664	30.39	0.00722149	2	942.536	-0.551548	28.2451	0
	Medium	VIFPAPTPK	1	1	1	Q13423		0	8.56539e+06	0.513953	1		0.027	0.1402	19.12	0.0771508	2	969.578	0.690932	53.1649	0
	Medium	SmGAIVR	1	1	1	Q13423	M2(Oxidation)	0	1.02465e+07				0.035	0.1927	17.48	0.266187	2	749.398	0.274009	26.6594	0
P78371	T-complex protein 1 subunit beta OS=Homo sapiens GN=CCT2 PE=1 SV=4 - [TCPB_HUMAN]	30.18	4.11	1	2	2	2	1.53945e+07				535	57.4521	6.45557
	A2	Sequence	# PSMs	# Proteins	# Protein Groups	Protein Group Accessions	Modifications	ΔCn	Area	(Medium+Heavy)/Light	(Medium+Heavy)/Light Count	(Medium+Heavy)/Light Variability [%]	q-Value	PEP	IonScore	Exp Value	Charge	MH+ [Da]	ΔM [ppm]	RT [min]	# Missed Cleavages
	Medium	IGVNQPK	1	1	1	P78371		0	2.64657e+07				0.022	0.1033	30.18	0.0151106	2	755.44	-1.16381	28.3909	0
	Medium	DASLmVTNDGATILK	1	1	1	P78371	M5(Oxidation)	0	4.32321e+06				0.033	0.185	10.79	1.19216	2	1564.79	1.06504	58.0701	0
P36543	V-type proton ATPase subunit E 1 OS=Homo sapiens GN=ATP6V1E1 PE=1 SV=1 - [VATE1_HUMAN]	30.1716	18.14	2	4	4	5	2.773e+07	0.978145	1		226	26.1288	8.00146
	A2	Sequence	# PSMs	# Proteins	# Protein Groups	Protein Group Accessions	Modifications	ΔCn	Area	(Medium+Heavy)/Light	(Medium+Heavy)/Light Count	(Medium+Heavy)/Light Variability [%]	q-Value	PEP	IonScore	Exp Value	Charge	MH+ [Da]	ΔM [ppm]	RT [min]	# Missed Cleavages
	High	IQmSNLmNQAR	2	1	1	P36543	M3(Oxidation); M7(Oxidation)	0	32955888	0.978145	1		0.006	0.06624	16.17	0.309179	2	1337.63	1.69742	30.9852	0
	Medium	AEEEFNIEK	1	2	1	P36543		0	9.35605e+06				0.022	0.1014	15.84	0.246282	2	1108.52	1.25045	44.6086	0
	Medium	LDLIAQQmmPEVR	1	1	1	P36543	M8(Oxidation); M9(Oxidation)	0	9.64311e+06				0.027	0.1409	22.85	0.068741	2	1575.79	-1.23083	54.8827	0
	Medium	VSNTLESR	1	2	1	P36543		0	40591001				0.045	0.2433	32.17	0.00910104	2	905.467	-2.27499	27.5888	0
O15394	Neural cell adhesion molecule 2 OS=Homo sapiens GN=NCAM2 PE=1 SV=2 - [NCAM2_HUMAN]	30.17	1.19	1	1	1	1	6.54768e+06	0.0366175	1		837	92.9882	5.60498
	A2	Sequence	# PSMs	# Proteins	# Protein Groups	Protein Group Accessions	Modifications	ΔCn	Area	(Medium+Heavy)/Light	(Medium+Heavy)/Light Count	(Medium+Heavy)/Light Variability [%]	q-Value	PEP	IonScore	Exp Value	Charge	MH+ [Da]	ΔM [ppm]	RT [min]	# Missed Cleavages
	Medium	IIELSQTTAK	1	1	1	O15394		0	6.54768e+06	0.0366175	1		0.038	0.2113	30.17	0.0117317	2	1103.63	-0.154524	44.1347	0
P02768	Serum albumin OS=Homo sapiens GN=ALB PE=1 SV=2 - [ALBU_HUMAN]	29.99	1.15	1	1	1	2	11308054				609	69.3215	6.27783
	A2	Sequence	# PSMs	# Proteins	# Protein Groups	Protein Group Accessions	Modifications	ΔCn	Area	(Medium+Heavy)/Light	(Medium+Heavy)/Light Count	(Medium+Heavy)/Light Variability [%]	q-Value	PEP	IonScore	Exp Value	Charge	MH+ [Da]	ΔM [ppm]	RT [min]	# Missed Cleavages
	Medium	LVTDLTK	2	1	1	P02768		0	11308054				0.013	0.07509	29.99	0.0174401	2	789.472	0.444806	39.8346	0
P07737	Profilin-1 OS=Homo sapiens GN=PFN1 PE=1 SV=2 - [PROF1_HUMAN]	29.6	10	1	1	1	1	2.18297e+07				140	15.0446	8.26514
	A2	Sequence	# PSMs	# Proteins	# Protein Groups	Protein Group Accessions	Modifications	ΔCn	Area	(Medium+Heavy)/Light	(Medium+Heavy)/Light Count	(Medium+Heavy)/Light Variability [%]	q-Value	PEP	IonScore	Exp Value	Charge	MH+ [Da]	ΔM [ppm]	RT [min]	# Missed Cleavages
	High	STGGAPTFNVTVTK	1	1	1	P07737		0	2.18297e+07				0	0.001382	29.6	0.0181467	2	1379.72	-0.25163	51.9363	0
Q12906	Interleukin enhancer-binding factor 3 OS=Homo sapiens GN=ILF3 PE=1 SV=3 - [ILF3_HUMAN]	29.54	0.78	1	1	1	1	1.14613e+07				894	95.2791	8.76318
	A2	Sequence	# PSMs	# Proteins	# Protein Groups	Protein Group Accessions	Modifications	ΔCn	Area	(Medium+Heavy)/Light	(Medium+Heavy)/Light Count	(Medium+Heavy)/Light Variability [%]	q-Value	PEP	IonScore	Exp Value	Charge	MH+ [Da]	ΔM [ppm]	RT [min]	# Missed Cleavages
	Medium	IFVNDDR	1	1	1	Q12906		0	1.14613e+07				0.032	0.1735	29.54	0.0176209	2	878.435	-2.0243	37.7227	0
Q9NX63	Coiled-coil-helix-coiled-coil-helix domain-containing protein 3, mitochondrial OS=Homo sapiens GN=CHCHD3 PE=1 SV=1 - [CHCH3_HUMAN]	29.24	3.52	1	1	1	1	6108403				227	26.1362	8.27979
	A2	Sequence	# PSMs	# Proteins	# Protein Groups	Protein Group Accessions	Modifications	ΔCn	Area	(Medium+Heavy)/Light	(Medium+Heavy)/Light Count	(Medium+Heavy)/Light Variability [%]	q-Value	PEP	IonScore	Exp Value	Charge	MH+ [Da]	ΔM [ppm]	RT [min]	# Missed Cleavages
	Medium	LSENVIDR	1	1	1	Q9NX63		0	6108403				0.029	0.1584	29.24	0.0181069	2	945.502	2.53481	40.3474	0
B2RXH8	Heterogeneous nuclear ribonucleoprotein C-like 2 OS=Homo sapiens GN=HNRNPCL2 PE=2 SV=1 - [HNRC2_HUMAN]	28.87	3.07	3	1	1	2	20929667				293	32.0528	5.43994
	A2	Sequence	# PSMs	# Proteins	# Protein Groups	Protein Group Accessions	Modifications	ΔCn	Area	(Medium+Heavy)/Light	(Medium+Heavy)/Light Count	(Medium+Heavy)/Light Variability [%]	q-Value	PEP	IonScore	Exp Value	Charge	MH+ [Da]	ΔM [ppm]	RT [min]	# Missed Cleavages
	High	AAVAGEDGR	2	3	1	B2RXH8		0	20929667				0.003	0.0537	28.87	0.00998828	2	845.41	-0.998741	19.5419	0
P24539	ATP synthase subunit b, mitochondrial OS=Homo sapiens GN=ATP5F1 PE=1 SV=2 - [AT5F1_HUMAN]	28.76	6.25	1	2	2	2	1.45341e+07	0.788563	2	92.1505	256	28.8903	9.36377
	A2	Sequence	# PSMs	# Proteins	# Protein Groups	Protein Group Accessions	Modifications	ΔCn	Area	(Medium+Heavy)/Light	(Medium+Heavy)/Light Count	(Medium+Heavy)/Light Variability [%]	q-Value	PEP	IonScore	Exp Value	Charge	MH+ [Da]	ΔM [ppm]	RT [min]	# Missed Cleavages
	High	LAQLEEAK	1	1	1	P24539		0	1.40911e+07	0.464693	1		0	0.01198	17.34	0.26107	2	901.501	2.27716	35.353	0
	Medium	SQQALVQK	1	1	1	P24539		0	14977073	1.33816	1		0.016	0.07873	28.92	0.0192991	2	901.509	-0.893304	26.4185	0
P23368	NAD-dependent malic enzyme, mitochondrial OS=Homo sapiens GN=ME2 PE=1 SV=1 - [MAOM_HUMAN]	28.57	1.54	2	1	1	1	27837687	0.489891	1		584	65.4018	7.60596
	A2	Sequence	# PSMs	# Proteins	# Protein Groups	Protein Group Accessions	Modifications	ΔCn	Area	(Medium+Heavy)/Light	(Medium+Heavy)/Light Count	(Medium+Heavy)/Light Variability [%]	q-Value	PEP	IonScore	Exp Value	Charge	MH+ [Da]	ΔM [ppm]	RT [min]	# Missed Cleavages
	High	AVVVTDGER	1	2	1	P23368		0	27837687	0.489891	1		0.001	0.02827	28.57	0.0186949	2	945.5	-0.251551	31.9792	0
P67936	Tropomyosin alpha-4 chain OS=Homo sapiens GN=TPM4 PE=1 SV=3 - [TPM4_HUMAN]	28.51	5.24	4	2	2	2	1.864e+07	0.888108	2	54.7413	248	28.5045	4.69092
	A2	Sequence	# PSMs	# Proteins	# Protein Groups	Protein Group Accessions	Modifications	ΔCn	Area	(Medium+Heavy)/Light	(Medium+Heavy)/Light Count	(Medium+Heavy)/Light Variability [%]	q-Value	PEP	IonScore	Exp Value	Charge	MH+ [Da]	ΔM [ppm]	RT [min]	# Missed Cleavages
	High	LATALQK	1	4	1	P67936		0	3.24081e+07	0.62878	1		0	0.01819	23.47	0.0667923	2	744.461	0.029659	32.156	0
	High	AEFAER	1	4	1	P67936		0	4871830	1.25439	1		0.005	0.05955	24.54	0.04957	2	722.347	-0.0456548	28.2963	0
P29966	Myristoylated alanine-rich C-kinase substrate OS=Homo sapiens GN=MARCKS PE=1 SV=4 - [MARCS_HUMAN]	28.5	3.31	1	1	1	1	19237106	0.601638	1		332	31.5359	4.44971
	A2	Sequence	# PSMs	# Proteins	# Protein Groups	Protein Group Accessions	Modifications	ΔCn	Area	(Medium+Heavy)/Light	(Medium+Heavy)/Light Count	(Medium+Heavy)/Light Variability [%]	q-Value	PEP	IonScore	Exp Value	Charge	MH+ [Da]	ΔM [ppm]	RT [min]	# Missed Cleavages
	High	AAEEPSKVEEK	1	1	1	P29966		0	19237106	0.601638	1		0	0.008535	28.5	0.0161736	3	1216.6	-1.74423	24.8975	1
P49006	MARCKS-related protein OS=Homo sapiens GN=MARCKSL1 PE=1 SV=2 - [MRP_HUMAN]	28.37	6.67	1	1	1	1	3.85918e+06				195	19.5172	4.66553
	A2	Sequence	# PSMs	# Proteins	# Protein Groups	Protein Group Accessions	Modifications	ΔCn	Area	(Medium+Heavy)/Light	(Medium+Heavy)/Light Count	(Medium+Heavy)/Light Variability [%]	q-Value	PEP	IonScore	Exp Value	Charge	MH+ [Da]	ΔM [ppm]	RT [min]	# Missed Cleavages
	High	AAATPESQEPQAK	1	1	1	P49006		0	3.85918e+06				0.003	0.04406	28.37	0.0219774	2	1327.65	-0.313488	26.1612	0
P49189	4-trimethylaminobutyraldehyde dehydrogenase OS=Homo sapiens GN=ALDH9A1 PE=1 SV=3 - [AL9A1_HUMAN]	27.97	3.85	1	2	2	2	2.03226e+07				494	53.767	5.87158
	A2	Sequence	# PSMs	# Proteins	# Protein Groups	Protein Group Accessions	Modifications	ΔCn	Area	(Medium+Heavy)/Light	(Medium+Heavy)/Light Count	(Medium+Heavy)/Light Variability [%]	q-Value	PEP	IonScore	Exp Value	Charge	MH+ [Da]	ΔM [ppm]	RT [min]	# Missed Cleavages
	High	AFEPATGR	1	1	1	P49189		0	1.81533e+07				0	0.02156	13.78	0.613533	2	848.425	-1.1596	32.2891	0
	High	VEPADASGTEK	1	1	1	P49189		0	2.24919e+07				0.004	0.05496	28.19	0.0126674	2	1103.52	-4.01793	23.5373	0
P62805	Histone H4 OS=Homo sapiens GN=HIST1H4A PE=1 SV=2 - [H4_HUMAN]	27.85	11.65	1	1	1	3	3.40665e+06				103	11.3604	11.356
	A2	Sequence	# PSMs	# Proteins	# Protein Groups	Protein Group Accessions	Modifications	ΔCn	Area	(Medium+Heavy)/Light	(Medium+Heavy)/Light Count	(Medium+Heavy)/Light Variability [%]	q-Value	PEP	IonScore	Exp Value	Charge	MH+ [Da]	ΔM [ppm]	RT [min]	# Missed Cleavages
	High	DNIQGITKPAIR	3	1	1	P62805		0	3.40665e+06				0	0.02675	23.22	0.0252508	2	1325.76	1.34066	48.5745	0
O14880	Microsomal glutathione S-transferase 3 OS=Homo sapiens GN=MGST3 PE=1 SV=1 - [MGST3_HUMAN]	27.79	5.26	1	1	1	1	1.45397e+06				152	16.5056	9.37842
	A2	Sequence	# PSMs	# Proteins	# Protein Groups	Protein Group Accessions	Modifications	ΔCn	Area	(Medium+Heavy)/Light	(Medium+Heavy)/Light Count	(Medium+Heavy)/Light Variability [%]	q-Value	PEP	IonScore	Exp Value	Charge	MH+ [Da]	ΔM [ppm]	RT [min]	# Missed Cleavages
	High	SGLGSGPK	1	1	1	O14880		0	1.45397e+06				0	0.003669	27.79	0.0223729	2	702.377	-1.16092	21.8889	0
O00487	26S proteasome non-ATPase regulatory subunit 14 OS=Homo sapiens GN=PSMD14 PE=1 SV=1 - [PSDE_HUMAN]	27.65	4.19	1	1	1	1	4.15663e+06				310	34.5546	6.52197
	A2	Sequence	# PSMs	# Proteins	# Protein Groups	Protein Group Accessions	Modifications	ΔCn	Area	(Medium+Heavy)/Light	(Medium+Heavy)/Light Count	(Medium+Heavy)/Light Variability [%]	q-Value	PEP	IonScore	Exp Value	Charge	MH+ [Da]	ΔM [ppm]	RT [min]	# Missed Cleavages
	High	AVAVVVDPIQSVK	1	1	1	O00487		0	4.15663e+06				0	0.01828	27.65	0.00446656	2	1324.78	-2.43834	61.572	0
P62745	Rho-related GTP-binding protein RhoB OS=Homo sapiens GN=RHOB PE=1 SV=1 - [RHOB_HUMAN]	27.37	4.08	1	1	1	1	5.90017e+06				196	22.1091	5.23682
	A2	Sequence	# PSMs	# Proteins	# Protein Groups	Protein Group Accessions	Modifications	ΔCn	Area	(Medium+Heavy)/Light	(Medium+Heavy)/Light Count	(Medium+Heavy)/Light Variability [%]	q-Value	PEP	IonScore	Exp Value	Charge	MH+ [Da]	ΔM [ppm]	RT [min]	# Missed Cleavages
	Medium	EVFETATR	1	1	1	P62745		0	5.90017e+06				0.039	0.2119	27.37	0.0252859	2	952.472	-1.58522	37.2418	0
O00330	Pyruvate dehydrogenase protein X component, mitochondrial OS=Homo sapiens GN=PDHX PE=1 SV=3 - [ODPX_HUMAN]	26.97	1.8	1	1	1	1	7.21639e+06				501	54.0888	8.66064
	A2	Sequence	# PSMs	# Proteins	# Protein Groups	Protein Group Accessions	Modifications	ΔCn	Area	(Medium+Heavy)/Light	(Medium+Heavy)/Light Count	(Medium+Heavy)/Light Variability [%]	q-Value	PEP	IonScore	Exp Value	Charge	MH+ [Da]	ΔM [ppm]	RT [min]	# Missed Cleavages
	High	VVDDELATR	1	1	1	O00330		0	7.21639e+06				0	0.009577	26.97	0.0297346	2	1017.52	0.954304	37.361	0
P0CW27	Coiled-coil domain-containing protein 166 OS=Homo sapiens GN=CCDC166 PE=4 SV=1 - [CC166_HUMAN]	26.94	1.82	1	1	1	1	40591001				439	48.6797	10.5942
	A2	Sequence	# PSMs	# Proteins	# Protein Groups	Protein Group Accessions	Modifications	ΔCn	Area	(Medium+Heavy)/Light	(Medium+Heavy)/Light Count	(Medium+Heavy)/Light Variability [%]	q-Value	PEP	IonScore	Exp Value	Charge	MH+ [Da]	ΔM [ppm]	RT [min]	# Missed Cleavages
	High	VSSQDTLR	1	1	1	P0CW27		0	40591001				0.003	0.03662	26.94	0.0326718	2	905.468	-1.06166	27.0798	0
P62937	Peptidyl-prolyl cis-trans isomerase A OS=Homo sapiens GN=PPIA PE=1 SV=2 - [PPIA_HUMAN]	26.88	6.67	1	1	1	2	9.77386e+06	1.73337	2	140.988	165	18.0009	7.81104
	A2	Sequence	# PSMs	# Proteins	# Protein Groups	Protein Group Accessions	Modifications	ΔCn	Area	(Medium+Heavy)/Light	(Medium+Heavy)/Light Count	(Medium+Heavy)/Light Variability [%]	q-Value	PEP	IonScore	Exp Value	Charge	MH+ [Da]	ΔM [ppm]	RT [min]	# Missed Cleavages
	High	EGmNIVEAmER	2	1	1	P62937	M3(Oxidation); M9(Oxidation)	0	9.77386e+06	1.73337	2	140.988	0	0.01365	26.02	0.00837616	2	1310.57	1.00893	36.259	0
P39023	60S ribosomal protein L3 OS=Homo sapiens GN=RPL3 PE=1 SV=2 - [RL3_HUMAN]	26.56	3.47	2	2	2	2	1.02922e+07	0.197453	1		403	46.0798	10.1841
	A2	Sequence	# PSMs	# Proteins	# Protein Groups	Protein Group Accessions	Modifications	ΔCn	Area	(Medium+Heavy)/Light	(Medium+Heavy)/Light Count	(Medium+Heavy)/Light Variability [%]	q-Value	PEP	IonScore	Exp Value	Charge	MH+ [Da]	ΔM [ppm]	RT [min]	# Missed Cleavages
	High	FIDTTSK	1	2	1	P39023		0	1.75538e+07				0	0.01606	21.71	0.0937594	2	811.42	0.329224	30.562	0
	High	VAFSVAR	1	1	1	P39023		0	3.03069e+06	0.197453	1		0.003	0.04681	23.35	0.133397	2	749.431	0.619806	43.3695	0
O94760	N(G),N(G)-dimethylarginine dimethylaminohydrolase 1 OS=Homo sapiens GN=DDAH1 PE=1 SV=3 - [DDAH1_HUMAN]	26.43	2.81	1	1	1	1	4.44199e+06	0.416372	1		285	31.1019	5.80811
	A2	Sequence	# PSMs	# Proteins	# Protein Groups	Protein Group Accessions	Modifications	ΔCn	Area	(Medium+Heavy)/Light	(Medium+Heavy)/Light Count	(Medium+Heavy)/Light Variability [%]	q-Value	PEP	IonScore	Exp Value	Charge	MH+ [Da]	ΔM [ppm]	RT [min]	# Missed Cleavages
	High	GEEVDVAR	1	1	1	O94760		0	4.44199e+06	0.416372	1		0	0.01637	26.43	0.0224097	2	874.424	-3.18798	30.3693	0
P31942	Heterogeneous nuclear ribonucleoprotein H3 OS=Homo sapiens GN=HNRNPH3 PE=1 SV=2 - [HNRH3_HUMAN]	26.14	3.47	1	1	1	1	9.16271e+06	0.153519	1		346	36.9031	6.87354
	A2	Sequence	# PSMs	# Proteins	# Protein Groups	Protein Group Accessions	Modifications	ΔCn	Area	(Medium+Heavy)/Light	(Medium+Heavy)/Light Count	(Medium+Heavy)/Light Variability [%]	q-Value	PEP	IonScore	Exp Value	Charge	MH+ [Da]	ΔM [ppm]	RT [min]	# Missed Cleavages
	High	STGEAFVQFASK	1	1	1	P31942		0	9.16271e+06	0.153519	1		0.003	0.04106	26.14	0.031497	2	1271.63	-1.30046	57.9282	0
Q96GD0	Pyridoxal phosphate phosphatase OS=Homo sapiens GN=PDXP PE=1 SV=2 - [PLPP_HUMAN]	26.12	4.73	1	1	1	1	2.16389e+07				296	31.6783	6.55127
	A2	Sequence	# PSMs	# Proteins	# Protein Groups	Protein Group Accessions	Modifications	ΔCn	Area	(Medium+Heavy)/Light	(Medium+Heavy)/Light Count	(Medium+Heavy)/Light Variability [%]	q-Value	PEP	IonScore	Exp Value	Charge	MH+ [Da]	ΔM [ppm]	RT [min]	# Missed Cleavages
	High	LAGDPSAGDGAAPR	1	1	1	Q96GD0		0	2.16389e+07				0	0.002193	26.12	0.0294433	2	1254.61	-0.229584	32.2046	0
Q15121	Astrocytic phosphoprotein PEA-15 OS=Homo sapiens GN=PEA15 PE=1 SV=2 - [PEA15_HUMAN]	25.97	7.69	1	1	1	1	30793145	0.592215	1		130	15.0308	5.021
	A2	Sequence	# PSMs	# Proteins	# Protein Groups	Protein Group Accessions	Modifications	ΔCn	Area	(Medium+Heavy)/Light	(Medium+Heavy)/Light Count	(Medium+Heavy)/Light Variability [%]	q-Value	PEP	IonScore	Exp Value	Charge	MH+ [Da]	ΔM [ppm]	RT [min]	# Missed Cleavages
	High	ISEEDELDTK	1	1	1	Q15121		0	30793145	0.592215	1		0	0.01535	25.97	0.0178316	2	1178.54	1.0737	36.9612	0
P08559	Pyruvate dehydrogenase E1 component subunit alpha, somatic form, mitochondrial OS=Homo sapiens GN=PDHA1 PE=1 SV=3 - [ODPA_HUMAN]	25.92	2.31	1	1	1	1	8.65393e+06				390	43.2676	8.06006
	A2	Sequence	# PSMs	# Proteins	# Protein Groups	Protein Group Accessions	Modifications	ΔCn	Area	(Medium+Heavy)/Light	(Medium+Heavy)/Light Count	(Medium+Heavy)/Light Variability [%]	q-Value	PEP	IonScore	Exp Value	Charge	MH+ [Da]	ΔM [ppm]	RT [min]	# Missed Cleavages
	High	AAASTDYYK	1	1	1	P08559		0	8.65393e+06				0.003	0.04749	25.92	0.0153515	2	989.456	-1.07517	31.3608	0
Q9H0E2	Toll-interacting protein OS=Homo sapiens GN=TOLLIP PE=1 SV=1 - [TOLIP_HUMAN]	25.57	2.92	1	1	1	1	1.5527e+07	0.333425	1		274	30.2622	5.97314
	A2	Sequence	# PSMs	# Proteins	# Protein Groups	Protein Group Accessions	Modifications	ΔCn	Area	(Medium+Heavy)/Light	(Medium+Heavy)/Light Count	(Medium+Heavy)/Light Variability [%]	q-Value	PEP	IonScore	Exp Value	Charge	MH+ [Da]	ΔM [ppm]	RT [min]	# Missed Cleavages
	Medium	ITPTQQQR	1	1	1	Q9H0E2		0	1.5527e+07	0.333425	1		0.036	0.1985	25.57	0.0259305	2	971.527	0.253115	22.4129	0
Q6PIU2	Neutral cholesterol ester hydrolase 1 OS=Homo sapiens GN=NCEH1 PE=1 SV=3 - [NCEH1_HUMAN]	25.53	2.94	1	1	1	1	1897144				408	45.7787	7.2251
	A2	Sequence	# PSMs	# Proteins	# Protein Groups	Protein Group Accessions	Modifications	ΔCn	Area	(Medium+Heavy)/Light	(Medium+Heavy)/Light Count	(Medium+Heavy)/Light Variability [%]	q-Value	PEP	IonScore	Exp Value	Charge	MH+ [Da]	ΔM [ppm]	RT [min]	# Missed Cleavages
	High	VTDTDFDGVEVR	1	1	1	Q6PIU2		0	1897144				0.002	0.03538	25.53	0.0243511	2	1352.63	-2.12092	52.4914	0
P16152	Carbonyl reductase [NADPH] 1 OS=Homo sapiens GN=CBR1 PE=1 SV=3 - [CBR1_HUMAN]	25.4	9.75	2	2	2	2	1.15417e+07	1.3108	1		277	30.3559	8.32373
	A2	Sequence	# PSMs	# Proteins	# Protein Groups	Protein Group Accessions	Modifications	ΔCn	Area	(Medium+Heavy)/Light	(Medium+Heavy)/Light Count	(Medium+Heavy)/Light Variability [%]	q-Value	PEP	IonScore	Exp Value	Charge	MH+ [Da]	ΔM [ppm]	RT [min]	# Missed Cleavages
	High	GQAAVQQLQAEGLSPR	1	2	1	P16152		0	2.7704e+06	1.3108	1		0	0.01173	19.87	0.126222	2	1652.87	-0.0942666	52.8299	0
	Medium	VVNVSSImSVR	1	1	1	P16152	M8(Oxidation)	0	2.0313e+07				0.016	0.07651	19.53	0.176059	2	1206.65	0.32367	50.3197	0
P84103	Serine/arginine-rich splicing factor 3 OS=Homo sapiens GN=SRSF3 PE=1 SV=1 - [SRSF3_HUMAN]	24.95	4.27	1	1	1	1	1.666e+06				164	19.3179	11.6489
	A2	Sequence	# PSMs	# Proteins	# Protein Groups	Protein Group Accessions	Modifications	ΔCn	Area	(Medium+Heavy)/Light	(Medium+Heavy)/Light Count	(Medium+Heavy)/Light Variability [%]	q-Value	PEP	IonScore	Exp Value	Charge	MH+ [Da]	ΔM [ppm]	RT [min]	# Missed Cleavages
	Medium	DAADAVR	1	1	1	P84103		0	1.666e+06				0.022	0.1111	24.95	0.0247914	2	717.352	-0.586671	21.2377	0
Q92823	Neuronal cell adhesion molecule OS=Homo sapiens GN=NRCAM PE=1 SV=3 - [NRCAM_HUMAN]	24.76	0.69	1	1	1	1	1.04402e+07				1304	143.8	5.65576
	A2	Sequence	# PSMs	# Proteins	# Protein Groups	Protein Group Accessions	Modifications	ΔCn	Area	(Medium+Heavy)/Light	(Medium+Heavy)/Light Count	(Medium+Heavy)/Light Variability [%]	q-Value	PEP	IonScore	Exp Value	Charge	MH+ [Da]	ΔM [ppm]	RT [min]	# Missed Cleavages
	High	VmAVNSIGK	1	1	1	Q92823	M2(Oxidation)	0	1.04402e+07				0.003	0.03792	24.76	0.0578157	2	934.502	-0.407062	33.0264	0
P09543	2',3'-cyclic-nucleotide 3'-phosphodiesterase OS=Homo sapiens GN=CNP PE=1 SV=2 - [CN37_HUMAN]	24.57	4.28	1	2	2	2	1.43517e+07	0.741487	2	173.247	421	47.5487	9.0708
	A2	Sequence	# PSMs	# Proteins	# Protein Groups	Protein Group Accessions	Modifications	ΔCn	Area	(Medium+Heavy)/Light	(Medium+Heavy)/Light Count	(Medium+Heavy)/Light Variability [%]	q-Value	PEP	IonScore	Exp Value	Charge	MH+ [Da]	ΔM [ppm]	RT [min]	# Missed Cleavages
	High	QFVPGDEPR	1	1	1	P09543		0	1.87221e+07	0.335091	1		0.003	0.03606	22.66	0.0582651	2	1044.51	1.14049	40.5538	0
	Medium	LSPTDNLPr	1	1	1	P09543	C-Term(Label:18O(1))	0	9.98128e+06	1.64076	1		0.017	0.08484	15.41	0.312198	2	1014.55	2.18355	43.7923	0
P55084	Trifunctional enzyme subunit beta, mitochondrial OS=Homo sapiens GN=HADHB PE=1 SV=3 - [ECHB_HUMAN]	24.43	1.9	1	1	1	1	8.15846e+06				474	51.2615	9.40771
	A2	Sequence	# PSMs	# Proteins	# Protein Groups	Protein Group Accessions	Modifications	ΔCn	Area	(Medium+Heavy)/Light	(Medium+Heavy)/Light Count	(Medium+Heavy)/Light Variability [%]	q-Value	PEP	IonScore	Exp Value	Charge	MH+ [Da]	ΔM [ppm]	RT [min]	# Missed Cleavages
	Medium	NVVVVDGVR	1	1	1	P55084		0	8.15846e+06				0.018	0.08923	24.43	0.0319112	2	956.55	-2.54764	44.3049	0
Q7L099	Protein RUFY3 OS=Homo sapiens GN=RUFY3 PE=1 SV=1 - [RUFY3_HUMAN]	24.15	4.69	1	2	2	2	8.597e+06	0.433788	1		469	52.9311	5.49072
	A2	Sequence	# PSMs	# Proteins	# Protein Groups	Protein Group Accessions	Modifications	ΔCn	Area	(Medium+Heavy)/Light	(Medium+Heavy)/Light Count	(Medium+Heavy)/Light Variability [%]	q-Value	PEP	IonScore	Exp Value	Charge	MH+ [Da]	ΔM [ppm]	RT [min]	# Missed Cleavages
	High	TAEGQALSEAR	1	1	1	Q7L099		0	1.4062e+07	0.433788	1		0	0.01685	17.25	0.238282	2	1132.56	0.989884	34.9035	0
	High	LTEELAVANNR	1	1	1	Q7L099		0	3.13204e+06				0.005	0.06041	22.4	0.0730809	2	1229.65	2.46863	44.2115	0
Q9BWM7	Sideroflexin-3 OS=Homo sapiens GN=SFXN3 PE=1 SV=2 - [SFXN3_HUMAN]	24.13	2.77	1	1	1	1					325	35.9557	9.08545
	A2	Sequence	# PSMs	# Proteins	# Protein Groups	Protein Group Accessions	Modifications	ΔCn	Area	(Medium+Heavy)/Light	(Medium+Heavy)/Light Count	(Medium+Heavy)/Light Variability [%]	q-Value	PEP	IonScore	Exp Value	Charge	MH+ [Da]	ΔM [ppm]	RT [min]	# Missed Cleavages
	High	SGDTPITVR	1	1	1	Q9BWM7		0	0				0	0.0217	24.13	0.0525459	2	945.501	0.856431	37.5082	0
O94973	AP-2 complex subunit alpha-2 OS=Homo sapiens GN=AP2A2 PE=1 SV=2 - [AP2A2_HUMAN]	23.99	0.96	2	1	1	1	38456894				939	103.895	6.96143
	A2	Sequence	# PSMs	# Proteins	# Protein Groups	Protein Group Accessions	Modifications	ΔCn	Area	(Medium+Heavy)/Light	(Medium+Heavy)/Light Count	(Medium+Heavy)/Light Variability [%]	q-Value	PEP	IonScore	Exp Value	Charge	MH+ [Da]	ΔM [ppm]	RT [min]	# Missed Cleavages
	High	NADVELQQR	1	2	1	O94973		0	38456894				0	0.002199	23.99	0.0484815	2	1072.54	0.496567	33.1339	0
P45974	Ubiquitin carboxyl-terminal hydrolase 5 OS=Homo sapiens GN=USP5 PE=1 SV=2 - [UBP5_HUMAN]	23.88	4.08	1	3	3	3	1.29242e+06	0.624042	1		858	95.7253	5.03369
	A2	Sequence	# PSMs	# Proteins	# Protein Groups	Protein Group Accessions	Modifications	ΔCn	Area	(Medium+Heavy)/Light	(Medium+Heavy)/Light Count	(Medium+Heavy)/Light Variability [%]	q-Value	PEP	IonScore	Exp Value	Charge	MH+ [Da]	ΔM [ppm]	RT [min]	# Missed Cleavages
	High	QLDNPAR	1	1	1	P45974		0	873471				0.003	0.03712	11.42	1.2367	2	813.421	-0.0848918	26.6357	0
	Medium	EEDPATGTGDPPR	1	1	1	P45974		0	1.20983e+06				0.017	0.08386	18.51	0.0620087	2	1341.59	-2.87203	30.2288	0
	Medium	SAADSISESVPVGPK	1	1	1	P45974		0	1.79396e+06	0.624042	1		0.022	0.1083	19.37	0.130641	2	1443.73	-3.58566	50.0751	0
P13591	Neural cell adhesion molecule 1 OS=Homo sapiens GN=NCAM1 PE=1 SV=3 - [NCAM1_HUMAN]	23.74	0.82	1	1	1	2	2.26e+07	0.253466	1		858	94.5152	4.86865
	A2	Sequence	# PSMs	# Proteins	# Protein Groups	Protein Group Accessions	Modifications	ΔCn	Area	(Medium+Heavy)/Light	(Medium+Heavy)/Light Count	(Medium+Heavy)/Light Variability [%]	q-Value	PEP	IonScore	Exp Value	Charge	MH+ [Da]	ΔM [ppm]	RT [min]	# Missed Cleavages
	Medium	LTPNQQR	2	1	1	P13591		0	2.26e+07	0.253466	1		0.029	0.1584	20.01	0.119225	2	856.463	-0.240326	20.4829	0
P39019	40S ribosomal protein S19 OS=Homo sapiens GN=RPS19 PE=1 SV=2 - [RS19_HUMAN]	23.73	6.9	1	1	1	1	1.12099e+07				145	16.0505	10.3159
	A2	Sequence	# PSMs	# Proteins	# Protein Groups	Protein Group Accessions	Modifications	ΔCn	Area	(Medium+Heavy)/Light	(Medium+Heavy)/Light Count	(Medium+Heavy)/Light Variability [%]	q-Value	PEP	IonScore	Exp Value	Charge	MH+ [Da]	ΔM [ppm]	RT [min]	# Missed Cleavages
	High	IAGQVAAANK	1	1	1	P39019		0	1.12099e+07				0	0.001749	23.73	0.0336796	2	942.538	0.937846	26.351	0
O75083	WD repeat-containing protein 1 OS=Homo sapiens GN=WDR1 PE=1 SV=4 - [WDR1_HUMAN]	23.53	3.96	1	3	3	3	2.90311e+07	0.131295	2	47.536	606	66.1519	6.65381
	A2	Sequence	# PSMs	# Proteins	# Protein Groups	Protein Group Accessions	Modifications	ΔCn	Area	(Medium+Heavy)/Light	(Medium+Heavy)/Light Count	(Medium+Heavy)/Light Variability [%]	q-Value	PEP	IonScore	Exp Value	Charge	MH+ [Da]	ΔM [ppm]	RT [min]	# Missed Cleavages
	High	IAVVGEGR	1	1	1	O75083		0	76802048				0.003	0.04218	19.33	0.130099	2	800.462	-0.482888	35.2359	0
	Medium	VFASLPQVER	1	1	1	O75083		0	3.15894e+06	0.0968344	1		0.021	0.09331	10.77	1.21442	2	1145.64	4.5852	57.6189	0
	Medium	LDVQPK	1	1	1	O75083		0	7.13218e+06	0.178018	1		0.026	0.1327	23.53	0.0379285	2	699.404	-0.0718945	29.7016	0
Q86VP6	Cullin-associated NEDD8-dissociated protein 1 OS=Homo sapiens GN=CAND1 PE=1 SV=2 - [CAND1_HUMAN]	23.49	0.65	1	1	1	1	1.25131e+07	0.234168	1		1230	136.289	5.78271
	A2	Sequence	# PSMs	# Proteins	# Protein Groups	Protein Group Accessions	Modifications	ΔCn	Area	(Medium+Heavy)/Light	(Medium+Heavy)/Light Count	(Medium+Heavy)/Light Variability [%]	q-Value	PEP	IonScore	Exp Value	Charge	MH+ [Da]	ΔM [ppm]	RT [min]	# Missed Cleavages
	High	SSVVTAVK	1	1	1	Q86VP6		0	1.25131e+07	0.234168	1		0	0.01376	23.49	0.0738727	2	790.468	1.66608	32.373	0
Q15717	ELAV-like protein 1 OS=Homo sapiens GN=ELAVL1 PE=1 SV=2 - [ELAV1_HUMAN]	23.44	6.13	1	2	2	2	6.86858e+06				326	36.0692	9.17334
	A2	Sequence	# PSMs	# Proteins	# Protein Groups	Protein Group Accessions	Modifications	ΔCn	Area	(Medium+Heavy)/Light	(Medium+Heavy)/Light Count	(Medium+Heavy)/Light Variability [%]	q-Value	PEP	IonScore	Exp Value	Charge	MH+ [Da]	ΔM [ppm]	RT [min]	# Missed Cleavages
	High	VLVDQTTGLSR	1	1	1	Q15717		0	7.48571e+06				0	0.01235	23.44	0.0557064	2	1188.66	0.137604	44.6286	0
	Medium	FAANPNQNK	1	1	1	Q15717		0	6.25144e+06				0.023	0.1205	10.08	1.16828	2	1003.49	-2.39129	26.1229	0
Q14103	Heterogeneous nuclear ribonucleoprotein D0 OS=Homo sapiens GN=HNRNPD PE=1 SV=1 - [HNRPD_HUMAN]	23.41	3.94	1	1	1	2	1.87126e+07	0.234977	1		355	38.4103	7.81104
	A2	Sequence	# PSMs	# Proteins	# Protein Groups	Protein Group Accessions	Modifications	ΔCn	Area	(Medium+Heavy)/Light	(Medium+Heavy)/Light Count	(Medium+Heavy)/Light Variability [%]	q-Value	PEP	IonScore	Exp Value	Charge	MH+ [Da]	ΔM [ppm]	RT [min]	# Missed Cleavages
	High	IFVGGLSPDTPEEK	2	1	1	Q14103		0	1.87126e+07	0.234977	1		0.001	0.0318	23.41	0.061793	2	1488.76	-0.510145	57.7872	0
Q9NZJ7	Mitochondrial carrier homolog 1 OS=Homo sapiens GN=MTCH1 PE=1 SV=1 - [MTCH1_HUMAN]	23.37	2.57	1	1	1	1	7.5355e+06				389	41.5173	9.31982
	A2	Sequence	# PSMs	# Proteins	# Protein Groups	Protein Group Accessions	Modifications	ΔCn	Area	(Medium+Heavy)/Light	(Medium+Heavy)/Light Count	(Medium+Heavy)/Light Variability [%]	q-Value	PEP	IonScore	Exp Value	Charge	MH+ [Da]	ΔM [ppm]	RT [min]	# Missed Cleavages
	High	GGAAAGVEAR	1	1	1	Q9NZJ7		0	7.5355e+06				0	0.01937	23.37	0.043034	2	858.442	-1.29569	23.7942	0
Q9NQX3	Gephyrin OS=Homo sapiens GN=GPHN PE=1 SV=1 - [GEPH_HUMAN]	23.22	1.9	1	1	1	1	4.59869e+06				736	79.698	5.42725
	A2	Sequence	# PSMs	# Proteins	# Protein Groups	Protein Group Accessions	Modifications	ΔCn	Area	(Medium+Heavy)/Light	(Medium+Heavy)/Light Count	(Medium+Heavy)/Light Variability [%]	q-Value	PEP	IonScore	Exp Value	Charge	MH+ [Da]	ΔM [ppm]	RT [min]	# Missed Cleavages
	High	DTASLSTTPSESPR	1	1	1	Q9NQX3		0	4.59869e+06				0	0.008273	23.22	0.0495488	2	1448.69	2.56078	36.7951	0
Q16181	Septin-7 OS=Homo sapiens GN=SEPT7 PE=1 SV=2 - [SEPT7_HUMAN]	23.16	1.83	1	1	1	1	1.61646e+07				437	50.648	8.63135
	A2	Sequence	# PSMs	# Proteins	# Protein Groups	Protein Group Accessions	Modifications	ΔCn	Area	(Medium+Heavy)/Light	(Medium+Heavy)/Light Count	(Medium+Heavy)/Light Variability [%]	q-Value	PEP	IonScore	Exp Value	Charge	MH+ [Da]	ΔM [ppm]	RT [min]	# Missed Cleavages
	High	TVQVEQSK	1	1	1	Q16181		0	1.61646e+07				0.003	0.05053	23.16	0.073908	2	918.491	1.59593	21.9183	0
P10114	Ras-related protein Rap-2a OS=Homo sapiens GN=RAP2A PE=1 SV=1 - [RAP2A_HUMAN]	23.16	6.01	3	1	1	1	3.624e+07				183	20.6023	4.81787
	A2	Sequence	# PSMs	# Proteins	# Protein Groups	Protein Group Accessions	Modifications	ΔCn	Area	(Medium+Heavy)/Light	(Medium+Heavy)/Light Count	(Medium+Heavy)/Light Variability [%]	q-Value	PEP	IonScore	Exp Value	Charge	MH+ [Da]	ΔM [ppm]	RT [min]	# Missed Cleavages
	Medium	VVVLGSGGVGK	1	3	1	P10114		0	3.624e+07				0.026	0.1323	23.16	0.0342972	2	971.588	-0.234565	44.1065	0
Q8TF72	Protein Shroom3 OS=Homo sapiens GN=SHROOM3 PE=1 SV=2 - [SHRM3_HUMAN]	23.14	0.45	1	1	1	1					1996	216.724	7.79639
	A2	Sequence	# PSMs	# Proteins	# Protein Groups	Protein Group Accessions	Modifications	ΔCn	Area	(Medium+Heavy)/Light	(Medium+Heavy)/Light Count	(Medium+Heavy)/Light Variability [%]	q-Value	PEP	IonScore	Exp Value	Charge	MH+ [Da]	ΔM [ppm]	RT [min]	# Missed Cleavages
	High	SSPATADKR	1	1	1	Q8TF72		0	0				0.003	0.0524	23.14	0.0650287	2	932.48	0.360042	27.7071	1
Q10567	AP-1 complex subunit beta-1 OS=Homo sapiens GN=AP1B1 PE=1 SV=2 - [AP1B1_HUMAN]	23.12	1.05	1	1	1	1	3.49762e+06				949	104.57	5.05908
	A2	Sequence	# PSMs	# Proteins	# Protein Groups	Protein Group Accessions	Modifications	ΔCn	Area	(Medium+Heavy)/Light	(Medium+Heavy)/Light Count	(Medium+Heavy)/Light Variability [%]	q-Value	PEP	IonScore	Exp Value	Charge	MH+ [Da]	ΔM [ppm]	RT [min]	# Missed Cleavages
	Medium	LLSTDPVAAK	1	1	1	Q10567		0	3.49762e+06				0.032	0.1828	23.12	0.0429025	2	1014.59	2.17959	43.1697	0
P51148	Ras-related protein Rab-5C OS=Homo sapiens GN=RAB5C PE=1 SV=2 - [RAB5C_HUMAN]	22.68	11.11	1	2	2	2	9.00159e+06				216	23.4678	8.41162
	A2	Sequence	# PSMs	# Proteins	# Protein Groups	Protein Group Accessions	Modifications	ΔCn	Area	(Medium+Heavy)/Light	(Medium+Heavy)/Light Count	(Medium+Heavy)/Light Variability [%]	q-Value	PEP	IonScore	Exp Value	Charge	MH+ [Da]	ΔM [ppm]	RT [min]	# Missed Cleavages
	High	GVDLQENNPASR	1	1	1	P51148		0	1.59411e+07				0	0.02421	22.68	0.0544906	2	1299.63	3.2878	37.9557	0
	High	NEPQNATGAPGR	1	1	1	P51148		0	2.06213e+06				0	0.01989	11.02	0.984395	2	1211.58	0.353692	24.729	0
P31146	Coronin-1A OS=Homo sapiens GN=CORO1A PE=1 SV=4 - [COR1A_HUMAN]	22.61	3.47	1	1	1	1	3.07199e+07				461	50.9938	6.68311
	A2	Sequence	# PSMs	# Proteins	# Protein Groups	Protein Group Accessions	Modifications	ΔCn	Area	(Medium+Heavy)/Light	(Medium+Heavy)/Light Count	(Medium+Heavy)/Light Variability [%]	q-Value	PEP	IonScore	Exp Value	Charge	MH+ [Da]	ΔM [ppm]	RT [min]	# Missed Cleavages
	High	AAPEASGTPSSDAVSR	1	1	1	P31146		0	3.07199e+07				0	0.001643	22.61	0.0438622	2	1502.71	0.620708	31.8803	0
P18085	ADP-ribosylation factor 4 OS=Homo sapiens GN=ARF4 PE=1 SV=3 - [ARF4_HUMAN]	22.42	6.11	4	1	1	1	7.39306e+06	1.35883	1		180	20.4977	7.13721
	A2	Sequence	# PSMs	# Proteins	# Protein Groups	Protein Group Accessions	Modifications	ΔCn	Area	(Medium+Heavy)/Light	(Medium+Heavy)/Light Count	(Medium+Heavy)/Light Variability [%]	q-Value	PEP	IonScore	Exp Value	Charge	MH+ [Da]	ΔM [ppm]	RT [min]	# Missed Cleavages
	High	ILmVGLDAAGK	1	4	1	P18085	M3(Oxidation)	0	7.39306e+06	1.35883	1		0	0.001437	22.42	0.0807642	2	1103.61	1.74831	54.444	0
Q08722	Leukocyte surface antigen CD47 OS=Homo sapiens GN=CD47 PE=1 SV=1 - [CD47_HUMAN]	22.4	3.41	1	1	1	1	1.76227e+07				323	35.1907	7.21045
	A2	Sequence	# PSMs	# Proteins	# Protein Groups	Protein Group Accessions	Modifications	ΔCn	Area	(Medium+Heavy)/Light	(Medium+Heavy)/Light Count	(Medium+Heavy)/Light Variability [%]	q-Value	PEP	IonScore	Exp Value	Charge	MH+ [Da]	ΔM [ppm]	RT [min]	# Missed Cleavages
	High	STVPTDFSSAK	1	1	1	Q08722		0	1.76227e+07				0	0.01741	22.4	0.0736563	2	1139.56	-0.564013	41.991	0
P06748	Nucleophosmin OS=Homo sapiens GN=NPM1 PE=1 SV=2 - [NPM_HUMAN]	22.38	5.44	1	2	2	2	51771811	0.316966	1		294	32.5548	4.77979
	A2	Sequence	# PSMs	# Proteins	# Protein Groups	Protein Group Accessions	Modifications	ΔCn	Area	(Medium+Heavy)/Light	(Medium+Heavy)/Light Count	(Medium+Heavy)/Light Variability [%]	q-Value	PEP	IonScore	Exp Value	Charge	MH+ [Da]	ΔM [ppm]	RT [min]	# Missed Cleavages
	High	GPSSVEDIK	1	1	1	P06748		0	87019232				0	0.007372	14.39	0.467631	2	931.473	-0.349319	34.2264	0
	Medium	mQASIEK	1	1	1	P06748	M1(Oxidation)	0	16524390	0.316966	1		0.028	0.1523	22.99	0.0665604	2	822.403	0.456468	20.8845	0
P46781	40S ribosomal protein S9 OS=Homo sapiens GN=RPS9 PE=1 SV=3 - [RS9_HUMAN]	22.33	3.09	1	1	1	1	2.28128e+06	0.263428	1		194	22.5776	10.6528
	A2	Sequence	# PSMs	# Proteins	# Protein Groups	Protein Group Accessions	Modifications	ΔCn	Area	(Medium+Heavy)/Light	(Medium+Heavy)/Light Count	(Medium+Heavy)/Light Variability [%]	q-Value	PEP	IonScore	Exp Value	Charge	MH+ [Da]	ΔM [ppm]	RT [min]	# Missed Cleavages
	High	TYVTPR	1	1	1	P46781		0	2.28128e+06	0.263428	1		0.005	0.06298	22.33	0.145028	2	736.399	-0.304361	29.0505	0
Q96PV0	Ras GTPase-activating protein SynGAP OS=Homo sapiens GN=SYNGAP1 PE=1 SV=4 - [SYGP1_HUMAN]	22.27	1.12	1	1	1	1	9.1536e+06				1343	148.191	8.98291
	A2	Sequence	# PSMs	# Proteins	# Protein Groups	Protein Group Accessions	Modifications	ΔCn	Area	(Medium+Heavy)/Light	(Medium+Heavy)/Light Count	(Medium+Heavy)/Light Variability [%]	q-Value	PEP	IonScore	Exp Value	Charge	MH+ [Da]	ΔM [ppm]	RT [min]	# Missed Cleavages
	High	LSQGSGSSITAAGmR	1	1	1	Q96PV0	M14(Oxidation)	0	9.1536e+06				0	0.005264	22.27	0.0764874	2	1438.69	-0.468816	34.4216	0
P14174	Macrophage migration inhibitory factor OS=Homo sapiens GN=MIF PE=1 SV=4 - [MIF_HUMAN]	22.11	9.57	1	1	1	1	2.33561e+07				115	12.4682	7.88428
	A2	Sequence	# PSMs	# Proteins	# Protein Groups	Protein Group Accessions	Modifications	ΔCn	Area	(Medium+Heavy)/Light	(Medium+Heavy)/Light Count	(Medium+Heavy)/Light Variability [%]	q-Value	PEP	IonScore	Exp Value	Charge	MH+ [Da]	ΔM [ppm]	RT [min]	# Missed Cleavages
	High	PmFIVNTNVPR	1	1	1	P14174	M2(Oxidation)	0	2.33561e+07				0.003	0.04066	22.11	0.110117	2	1303.69	3.93308	56.8925	0
Q9BYH1	Seizure 6-like protein OS=Homo sapiens GN=SEZ6L PE=1 SV=1 - [SE6L1_HUMAN]	22.1	0.88	1	1	1	1	3.85087e+06				1024	111.711	4.77979
	A2	Sequence	# PSMs	# Proteins	# Protein Groups	Protein Group Accessions	Modifications	ΔCn	Area	(Medium+Heavy)/Light	(Medium+Heavy)/Light Count	(Medium+Heavy)/Light Variability [%]	q-Value	PEP	IonScore	Exp Value	Charge	MH+ [Da]	ΔM [ppm]	RT [min]	# Missed Cleavages
	Medium	IEFTSDQAR	1	1	1	Q9BYH1		0	3.85087e+06				0.03	0.16	22.1	0.0823154	2	1066.52	0.909768	40.0177	0
O60502	Bifunctional protein NCOAT OS=Homo sapiens GN=MGEA5 PE=1 SV=2 - [NCOAT_HUMAN]	22.06	0.98	1	1	1	1	1.16764e+06	0.333093	1		916	102.849	4.90674
	A2	Sequence	# PSMs	# Proteins	# Protein Groups	Protein Group Accessions	Modifications	ΔCn	Area	(Medium+Heavy)/Light	(Medium+Heavy)/Light Count	(Medium+Heavy)/Light Variability [%]	q-Value	PEP	IonScore	Exp Value	Charge	MH+ [Da]	ΔM [ppm]	RT [min]	# Missed Cleavages
	High	ESQATLEER	1	1	1	O60502		0	1.16764e+06	0.333093	1		0	0.005205	22.06	0.0488506	2	1062.51	0.374676	29.1802	0
Q93050	V-type proton ATPase 116 kDa subunit a isoform 1 OS=Homo sapiens GN=ATP6V0A1 PE=1 SV=3 - [VPP1_HUMAN]	22	2.75	1	2	2	2	9.05633e+06	0.502906	1		837	96.3501	6.43018
	A2	Sequence	# PSMs	# Proteins	# Protein Groups	Protein Group Accessions	Modifications	ΔCn	Area	(Medium+Heavy)/Light	(Medium+Heavy)/Light Count	(Medium+Heavy)/Light Variability [%]	q-Value	PEP	IonScore	Exp Value	Charge	MH+ [Da]	ΔM [ppm]	RT [min]	# Missed Cleavages
	High	DLNPDVNVFQR	1	1	1	Q93050		0	5.40509e+06				0.001	0.03031	13.51	0.516961	2	1316.66	-0.132163	60.2499	0
	High	mQTNQTPPTYNK	1	1	1	Q93050	M1(Oxidation)	0	12707572	0.502906	1		0.003	0.044	21.99	0.0524902	2	1438.67	1.43357	28.8494	0
O14531	Dihydropyrimidinase-related protein 4 OS=Homo sapiens GN=DPYSL4 PE=1 SV=2 - [DPYL4_HUMAN]	21.66	3.5	1	2	2	2	6.45378e+06				572	61.8384	7.09326
	A2	Sequence	# PSMs	# Proteins	# Protein Groups	Protein Group Accessions	Modifications	ΔCn	Area	(Medium+Heavy)/Light	(Medium+Heavy)/Light Count	(Medium+Heavy)/Light Variability [%]	q-Value	PEP	IonScore	Exp Value	Charge	MH+ [Da]	ΔM [ppm]	RT [min]	# Missed Cleavages
	High	GAPAVVISQGR	1	1	1	O14531		0	1.17602e+07				0	0.00973	13.49	0.329069	2	1054.6	3.43276	41.268	0
	Medium	mFVTPGAGR	1	1	1	O14531	M1(Oxidation)	0	1.14733e+06				0.022	0.09837	21.66	0.08461	2	951.469	-2.75734	38.0177	0
O43301	Heat shock 70 kDa protein 12A OS=Homo sapiens GN=HSPA12A PE=1 SV=2 - [HS12A_HUMAN]	21.64	4	1	2	2	2	1.1969e+07	0.222636	1		675	74.9315	6.771
	A2	Sequence	# PSMs	# Proteins	# Protein Groups	Protein Group Accessions	Modifications	ΔCn	Area	(Medium+Heavy)/Light	(Medium+Heavy)/Light Count	(Medium+Heavy)/Light Variability [%]	q-Value	PEP	IonScore	Exp Value	Charge	MH+ [Da]	ΔM [ppm]	RT [min]	# Missed Cleavages
	High	ETAPTSAYSSPAR	1	1	1	O43301		0	2.09253e+07	0.222636	1		0	0.008182	20.82	0.0964553	2	1337.63	0.908853	34.4454	0
	High	LDLTGTSGTAVPAR	1	1	1	O43301		0	3.01275e+06				0.004	0.05701	14.32	0.497419	2	1358.74	5.90986	49.7198	0
O75390	Citrate synthase, mitochondrial OS=Homo sapiens GN=CS PE=1 SV=2 - [CISY_HUMAN]	21.47	6.01	1	3	3	3	1.93097e+07	0.854288	2	4.44022	466	51.6795	8.32373
	A2	Sequence	# PSMs	# Proteins	# Protein Groups	Protein Group Accessions	Modifications	ΔCn	Area	(Medium+Heavy)/Light	(Medium+Heavy)/Light Count	(Medium+Heavy)/Light Variability [%]	q-Value	PEP	IonScore	Exp Value	Charge	MH+ [Da]	ΔM [ppm]	RT [min]	# Missed Cleavages
	High	IVPNVLLEQGK	1	1	1	O75390		0	8.10229e+06	0.829095	1		0	0.02348	21.47	0.0199599	2	1209.72	-2.27861	59.587	0
	Medium	SmSTEGLmK	1	1	1	O75390	M2(Oxidation); M8(Oxidation)	0	26384934	0.880247	1		0.022	0.1146	12.98	0.216505	2	1015.45	2.53211	24.5393	0
	Medium	AYAQGISR	1	1	1	O75390		0	2.34419e+07				0.032	0.1831	13.99	0.885835	2	865.454	1.21395	30.9437	0
Q9NWV8	BRISC and BRCA1-A complex member 1 OS=Homo sapiens GN=BABAM1 PE=1 SV=1 - [BABA1_HUMAN]	21.39	3.34	1	1	1	1	2235428				329	36.5366	4.64014
	A2	Sequence	# PSMs	# Proteins	# Protein Groups	Protein Group Accessions	Modifications	ΔCn	Area	(Medium+Heavy)/Light	(Medium+Heavy)/Light Count	(Medium+Heavy)/Light Variability [%]	q-Value	PEP	IonScore	Exp Value	Charge	MH+ [Da]	ΔM [ppm]	RT [min]	# Missed Cleavages
	Medium	AVGAQASVGSR	1	1	1	Q9NWV8		0	2235428				0.016	0.08236	21.39	0.0951199	2	1002.54	4.22186	27.2536	0
Q9H115	Beta-soluble NSF attachment protein OS=Homo sapiens GN=NAPB PE=1 SV=2 - [SNAB_HUMAN]	21.16	4.36	1	1	1	1	1.26776e+07	0.808395	1		298	33.5355	5.46533
	A2	Sequence	# PSMs	# Proteins	# Protein Groups	Protein Group Accessions	Modifications	ΔCn	Area	(Medium+Heavy)/Light	(Medium+Heavy)/Light Count	(Medium+Heavy)/Light Variability [%]	q-Value	PEP	IonScore	Exp Value	Charge	MH+ [Da]	ΔM [ppm]	RT [min]	# Missed Cleavages
	High	SIQGDGEGDGDLK	1	1	1	Q9H115		0	1.26776e+07	0.808395	1		0	0.01298	21.16	0.0386626	2	1290.58	0.920165	33.653	0
Q9Y6K8	Adenylate kinase isoenzyme 5 OS=Homo sapiens GN=AK5 PE=1 SV=2 - [KAD5_HUMAN]	21.15	2.14	1	1	1	1	6.24554e+06				562	63.2931	5.07178
	A2	Sequence	# PSMs	# Proteins	# Protein Groups	Protein Group Accessions	Modifications	ΔCn	Area	(Medium+Heavy)/Light	(Medium+Heavy)/Light Count	(Medium+Heavy)/Light Variability [%]	q-Value	PEP	IonScore	Exp Value	Charge	MH+ [Da]	ΔM [ppm]	RT [min]	# Missed Cleavages
	High	IILVIGGPGSGK	1	1	1	Q9Y6K8		0	6.24554e+06				0.002	0.03581	21.15	0.0141962	2	1110.69	1.50864	61.2681	0
P16615	Sarcoplasmic/endoplasmic reticulum calcium ATPase 2 OS=Homo sapiens GN=ATP2A2 PE=1 SV=1 - [AT2A2_HUMAN]	21.04	3.36	3	3	3	3	6.20443e+06	0.497492	1		1042	114.683	5.33838
	A2	Sequence	# PSMs	# Proteins	# Protein Groups	Protein Group Accessions	Modifications	ΔCn	Area	(Medium+Heavy)/Light	(Medium+Heavy)/Light Count	(Medium+Heavy)/Light Variability [%]	q-Value	PEP	IonScore	Exp Value	Charge	MH+ [Da]	ΔM [ppm]	RT [min]	# Missed Cleavages
	High	EFDELNPSAQR	1	1	1	P16615		0	7.50021e+06				0.001	0.03189	17.53	0.123623	2	1305.61	0.429106	47.8863	0
	High	AEIGIAmGSGTAVAK	1	3	1	P16615	M7(Oxidation)	0	7.12369e+06				0.008	0.06826	17.51	0.274112	2	1391.72	1.86494	43.8017	0
	Medium	VImITGDNK	1	2	1	P16615	M3(Oxidation)	0	3.9894e+06	0.497492	1		0.016	0.08133	14.51	0.787644	2	1006.52	0.519899	37.9115	0
P54577	Tyrosine--tRNA ligase, cytoplasmic OS=Homo sapiens GN=YARS PE=1 SV=4 - [SYYC_HUMAN]	21.03	2.08	1	1	1	1	3.36995e+06				528	59.1061	7.04932
	A2	Sequence	# PSMs	# Proteins	# Protein Groups	Protein Group Accessions	Modifications	ΔCn	Area	(Medium+Heavy)/Light	(Medium+Heavy)/Light Count	(Medium+Heavy)/Light Variability [%]	q-Value	PEP	IonScore	Exp Value	Charge	MH+ [Da]	ΔM [ppm]	RT [min]	# Missed Cleavages
	High	LASAAYPDPSK	1	1	1	P54577		0	3.36995e+06				0	0.01594	21.03	0.125429	2	1119.57	0.482163	37.5894	0
Q9NRW1	Ras-related protein Rab-6B OS=Homo sapiens GN=RAB6B PE=1 SV=1 - [RAB6B_HUMAN]	21.01	4.81	1	1	1	1	3.92402e+06	0.0844423	1		208	23.4469	5.52881
	A2	Sequence	# PSMs	# Proteins	# Protein Groups	Protein Group Accessions	Modifications	ΔCn	Area	(Medium+Heavy)/Light	(Medium+Heavy)/Light Count	(Medium+Heavy)/Light Variability [%]	q-Value	PEP	IonScore	Exp Value	Charge	MH+ [Da]	ΔM [ppm]	RT [min]	# Missed Cleavages
	High	QITIEEGEQR	1	1	1	Q9NRW1		0	3.92402e+06	0.0844423	1		0	0.01921	21.01	0.0990627	2	1202.6	1.04215	39.3697	0
P51649	Succinate-semialdehyde dehydrogenase, mitochondrial OS=Homo sapiens GN=ALDH5A1 PE=1 SV=2 - [SSDH_HUMAN]	21	2.06	1	1	1	1	5766516				535	57.1783	8.27979
	A2	Sequence	# PSMs	# Proteins	# Protein Groups	Protein Group Accessions	Modifications	ΔCn	Area	(Medium+Heavy)/Light	(Medium+Heavy)/Light Count	(Medium+Heavy)/Light Variability [%]	q-Value	PEP	IonScore	Exp Value	Charge	MH+ [Da]	ΔM [ppm]	RT [min]	# Missed Cleavages
	High	ISFTGSTTTGK	1	1	1	P51649		0	5766516				0	0.02562	21	0.110014	2	1099.56	1.67851	40.7046	0
P08237	6-phosphofructokinase, muscle type OS=Homo sapiens GN=PFKM PE=1 SV=2 - [K6PF_HUMAN]	20.12	2.18	3	2	2	2	3.00662e+07	0.577313	2	50.703	780	85.1284	7.98682
	A2	Sequence	# PSMs	# Proteins	# Protein Groups	Protein Group Accessions	Modifications	ΔCn	Area	(Medium+Heavy)/Light	(Medium+Heavy)/Light Count	(Medium+Heavy)/Light Variability [%]	q-Value	PEP	IonScore	Exp Value	Charge	MH+ [Da]	ΔM [ppm]	RT [min]	# Missed Cleavages
	Medium	GGTPSAFDR	1	3	1	P08237		0	59245264	0.418117	1		0.032	0.1798	20.12	0.0909519	2	907.426	-0.947015	34.5114	0
	Medium	VGIFTGAR	1	1	1	P08237		0	887146	0.797122	1		0.037	0.2012	19.86	0.248379	2	820.467	-1.30658	49.936	0
P17612	cAMP-dependent protein kinase catalytic subunit alpha OS=Homo sapiens GN=PRKACA PE=1 SV=2 - [KAPCA_HUMAN]	19.6	2.56	2	1	1	1	11112647				351	40.564	8.79248
	A2	Sequence	# PSMs	# Proteins	# Protein Groups	Protein Group Accessions	Modifications	ΔCn	Area	(Medium+Heavy)/Light	(Medium+Heavy)/Light Count	(Medium+Heavy)/Light Variability [%]	q-Value	PEP	IonScore	Exp Value	Charge	MH+ [Da]	ΔM [ppm]	RT [min]	# Missed Cleavages
	High	TLGTGSFGR	1	2	1	P17612		0	11112647				0	0.02242	19.6	0.18695	2	895.464	0.40014	42.2282	0
P08247	Synaptophysin OS=Homo sapiens GN=SYP PE=1 SV=3 - [SYPH_HUMAN]	19.58	3.19	1	1	1	1	1.11091e+07	2.3257	1		313	33.8234	4.80518
	A2	Sequence	# PSMs	# Proteins	# Protein Groups	Protein Group Accessions	Modifications	ΔCn	Area	(Medium+Heavy)/Light	(Medium+Heavy)/Light Count	(Medium+Heavy)/Light Variability [%]	q-Value	PEP	IonScore	Exp Value	Charge	MH+ [Da]	ΔM [ppm]	RT [min]	# Missed Cleavages
	High	mATDPENIIK	1	1	1	P08247	M1(Oxidation)	0	1.11091e+07	2.3257	1		0	0.01484	19.58	0.12172	2	1147.57	-0.0736529	45.8426	0
Q15700	Disks large homolog 2 OS=Homo sapiens GN=DLG2 PE=1 SV=3 - [DLG2_HUMAN]	19.5	1.38	1	1	1	1	9.1174e+06	0.618773	1		870	97.4915	6.46826
	A2	Sequence	# PSMs	# Proteins	# Protein Groups	Protein Group Accessions	Modifications	ΔCn	Area	(Medium+Heavy)/Light	(Medium+Heavy)/Light Count	(Medium+Heavy)/Light Variability [%]	q-Value	PEP	IonScore	Exp Value	Charge	MH+ [Da]	ΔM [ppm]	RT [min]	# Missed Cleavages
	High	IIPGGAAAEDGR	1	1	1	Q15700		0	9.1174e+06	0.618773	1		0.001	0.0311	19.5	0.198597	2	1126.59	1.13802	36.5104	0
O43390	Heterogeneous nuclear ribonucleoprotein R OS=Homo sapiens GN=HNRNPR PE=1 SV=1 - [HNRPR_HUMAN]	19.12	1.74	1	1	1	1	1.89202e+06	1.74414	1		633	70.8993	8.1333
	A2	Sequence	# PSMs	# Proteins	# Protein Groups	Protein Group Accessions	Modifications	ΔCn	Area	(Medium+Heavy)/Light	(Medium+Heavy)/Light Count	(Medium+Heavy)/Light Variability [%]	q-Value	PEP	IonScore	Exp Value	Charge	MH+ [Da]	ΔM [ppm]	RT [min]	# Missed Cleavages
	Medium	LmmDPLSGQNR	1	1	1	O43390	M2(Oxidation); M3(Oxidation)	0	1.89202e+06	1.74414	1		0.016	0.07898	19.12	0.0912339	2	1293.59	-0.725806	38.911	0
Q07020	60S ribosomal protein L18 OS=Homo sapiens GN=RPL18 PE=1 SV=2 - [RL18_HUMAN]	18.57	6.91	1	1	1	1	1.0685e+07				188	21.6211	11.7222
	A2	Sequence	# PSMs	# Proteins	# Protein Groups	Protein Group Accessions	Modifications	ΔCn	Area	(Medium+Heavy)/Light	(Medium+Heavy)/Light Count	(Medium+Heavy)/Light Variability [%]	q-Value	PEP	IonScore	Exp Value	Charge	MH+ [Da]	ΔM [ppm]	RT [min]	# Missed Cleavages
	Medium	TAVVVGTITDDVR	1	1	1	Q07020		0	1.0685e+07				0.013	0.07513	18.57	0.186254	2	1345.73	0.441681	56.7532	0
P62714	Serine/threonine-protein phosphatase 2A catalytic subunit beta isoform OS=Homo sapiens GN=PPP2CB PE=1 SV=1 - [PP2AB_HUMAN]	18.57	2.59	2	1	1	1	5.69243e+06	0.633841	1		309	35.5523	5.42725
	A2	Sequence	# PSMs	# Proteins	# Protein Groups	Protein Group Accessions	Modifications	ΔCn	Area	(Medium+Heavy)/Light	(Medium+Heavy)/Light Count	(Medium+Heavy)/Light Variability [%]	q-Value	PEP	IonScore	Exp Value	Charge	MH+ [Da]	ΔM [ppm]	RT [min]	# Missed Cleavages
	Medium	ESNVQEVR	1	2	1	P62714		0	5.69243e+06	0.633841	1		0.018	0.08798	18.57	0.169574	2	960.473	-1.46824	24.8241	0
Q96CW1	AP-2 complex subunit mu OS=Homo sapiens GN=AP2M1 PE=1 SV=2 - [AP2M1_HUMAN]	18.4	5.06	1	3	3	3	2.26519e+07	0.368994	2	4.85421	435	49.623	9.53955
	A2	Sequence	# PSMs	# Proteins	# Protein Groups	Protein Group Accessions	Modifications	ΔCn	Area	(Medium+Heavy)/Light	(Medium+Heavy)/Light Count	(Medium+Heavy)/Light Variability [%]	q-Value	PEP	IonScore	Exp Value	Charge	MH+ [Da]	ΔM [ppm]	RT [min]	# Missed Cleavages
	High	NAVDAFR	1	1	1	Q96CW1		0	23043445	0.381268	1		0	0.01977	18.4	0.298483	2	792.4	-0.348982	39.9282	0
	High	SPVTNIAR	1	1	1	Q96CW1		0	3.40268e+07	0.357115	1		0.004	0.05785	14.38	0.492418	2	857.484	0.301106	35.6701	0
	Medium	SGIYETR	1	1	1	Q96CW1		0	10885547				0.017	0.0861	11.51	0.639217	2	825.409	-1.68679	31.7761	0
Q9UNW9	RNA-binding protein Nova-2 OS=Homo sapiens GN=NOVA2 PE=1 SV=1 - [NOVA2_HUMAN]	18.32	1.63	1	1	1	1	8.24764e+06				492	48.9786	8.1626
	A2	Sequence	# PSMs	# Proteins	# Protein Groups	Protein Group Accessions	Modifications	ΔCn	Area	(Medium+Heavy)/Light	(Medium+Heavy)/Light Count	(Medium+Heavy)/Light Variability [%]	q-Value	PEP	IonScore	Exp Value	Charge	MH+ [Da]	ΔM [ppm]	RT [min]	# Missed Cleavages
	Medium	VTYEQGVR	1	1	1	Q9UNW9		0	8.24764e+06				0.029	0.1579	18.32	0.240723	2	951.49	1.00132	31.9967	0
Q9H492	Microtubule-associated proteins 1A/1B light chain 3A OS=Homo sapiens GN=MAP1LC3A PE=1 SV=2 - [MLP3A_HUMAN]	18.31	5.79	3	1	1	1	969444				121	14.2634	8.67529
	A2	Sequence	# PSMs	# Proteins	# Protein Groups	Protein Group Accessions	Modifications	ΔCn	Area	(Medium+Heavy)/Light	(Medium+Heavy)/Light Count	(Medium+Heavy)/Light Variability [%]	q-Value	PEP	IonScore	Exp Value	Charge	MH+ [Da]	ΔM [ppm]	RT [min]	# Missed Cleavages
	High	QLPVLDK	1	3	1	Q9H492		0	969444				0	0.01971	18.31	0.0833774	2	812.488	0.508817	47.3884	0
P05413	Fatty acid-binding protein, heart OS=Homo sapiens GN=FABP3 PE=1 SV=4 - [FABPH_HUMAN]	18.25	16.54	1	2	2	3	8.31646e+06	0.322967	2	24.8155	133	14.8487	6.80029
	A2	Sequence	# PSMs	# Proteins	# Protein Groups	Protein Group Accessions	Modifications	ΔCn	Area	(Medium+Heavy)/Light	(Medium+Heavy)/Light Count	(Medium+Heavy)/Light Variability [%]	q-Value	PEP	IonScore	Exp Value	Charge	MH+ [Da]	ΔM [ppm]	RT [min]	# Missed Cleavages
	High	LGVEFDETTADDR	1	1	1	P05413		0	4.77627e+06	0.273873	1		0	0.01629	15.22	0.190886	2	1467.66	-0.022936	53.3287	0
	High	SLGVGFATR	2	1	1	P05413		0	1.18566e+07	0.380861	1		0.004	0.05728	18.03	0.247902	2	907.499	-0.292108	51.9568	0
P62993	Growth factor receptor-bound protein 2 OS=Homo sapiens GN=GRB2 PE=1 SV=1 - [GRB2_HUMAN]	18.17	3.69	1	1	1	1	8.52396e+06				217	25.1904	6.31592
	A2	Sequence	# PSMs	# Proteins	# Protein Groups	Protein Group Accessions	Modifications	ΔCn	Area	(Medium+Heavy)/Light	(Medium+Heavy)/Light Count	(Medium+Heavy)/Light Variability [%]	q-Value	PEP	IonScore	Exp Value	Charge	MH+ [Da]	ΔM [ppm]	RT [min]	# Missed Cleavages
	High	NYVTPVNR	1	1	1	P62993		0	8.52396e+06				0.005	0.06261	18.17	0.247659	2	962.505	0.0503142	35.3728	0
Q16851	UTP--glucose-1-phosphate uridylyltransferase OS=Homo sapiens GN=UGP2 PE=1 SV=5 - [UGPA_HUMAN]	17.92	1.77	1	1	1	1	1.76646e+06				508	56.9047	8.14795
	A2	Sequence	# PSMs	# Proteins	# Protein Groups	Protein Group Accessions	Modifications	ΔCn	Area	(Medium+Heavy)/Light	(Medium+Heavy)/Light Count	(Medium+Heavy)/Light Variability [%]	q-Value	PEP	IonScore	Exp Value	Charge	MH+ [Da]	ΔM [ppm]	RT [min]	# Missed Cleavages
	Medium	LVEIAQVPK	1	1	1	Q16851		0	1.76646e+06				0.027	0.1386	17.92	0.0460092	2	996.61	0.746937	51.5258	0
P05198	Eukaryotic translation initiation factor 2 subunit 1 OS=Homo sapiens GN=EIF2S1 PE=1 SV=3 - [IF2A_HUMAN]	17.22	3.81	1	1	1	1	2.89024e+06	0.70313	1		315	36.0894	5.08447
	A2	Sequence	# PSMs	# Proteins	# Protein Groups	Protein Group Accessions	Modifications	ΔCn	Area	(Medium+Heavy)/Light	(Medium+Heavy)/Light Count	(Medium+Heavy)/Light Variability [%]	q-Value	PEP	IonScore	Exp Value	Charge	MH+ [Da]	ΔM [ppm]	RT [min]	# Missed Cleavages
	Medium	VVTDTDETELAR	1	1	1	P05198		0	2.89024e+06	0.70313	1		0.026	0.1322	17.22	0.245623	2	1348.66	-2.64421	40.5927	0
O95674	Phosphatidate cytidylyltransferase 2 OS=Homo sapiens GN=CDS2 PE=1 SV=1 - [CDS2_HUMAN]	17.16	4.27	1	1	1	1	2.89548e+06				445	51.3841	7.09326
	A2	Sequence	# PSMs	# Proteins	# Protein Groups	Protein Group Accessions	Modifications	ΔCn	Area	(Medium+Heavy)/Light	(Medium+Heavy)/Light Count	(Medium+Heavy)/Light Variability [%]	q-Value	PEP	IonScore	Exp Value	Charge	MH+ [Da]	ΔM [ppm]	RT [min]	# Missed Cleavages
	High	AESAPLPVSADDTPEVLNR	1	1	1	O95674		0	2.89548e+06				0	0.01824	17.16	0.228848	2	1980.99	0.293459	61.4699	0
P04156	Major prion protein OS=Homo sapiens GN=PRNP PE=1 SV=1 - [PRIO_HUMAN]	17.07	3.16	1	1	1	1	6.59617e+06				253	27.6432	8.99756
	A2	Sequence	# PSMs	# Proteins	# Protein Groups	Protein Group Accessions	Modifications	ΔCn	Area	(Medium+Heavy)/Light	(Medium+Heavy)/Light Count	(Medium+Heavy)/Light Variability [%]	q-Value	PEP	IonScore	Exp Value	Charge	MH+ [Da]	ΔM [ppm]	RT [min]	# Missed Cleavages
	Medium	ESQAYYQR	1	1	1	P04156		0	6.59617e+06				0.027	0.1455	17.07	0.118783	2	1044.48	1.77568	29.3195	0
Q92598	Heat shock protein 105 kDa OS=Homo sapiens GN=HSPH1 PE=1 SV=1 - [HS105_HUMAN]	16.89	2.21	1	2	2	2	8.60705e+06	1.10611	1		858	96.8037	5.38916
	A2	Sequence	# PSMs	# Proteins	# Protein Groups	Protein Group Accessions	Modifications	ΔCn	Area	(Medium+Heavy)/Light	(Medium+Heavy)/Light Count	(Medium+Heavy)/Light Variability [%]	q-Value	PEP	IonScore	Exp Value	Charge	MH+ [Da]	ΔM [ppm]	RT [min]	# Missed Cleavages
	High	FVVQNVSAQK	1	1	1	Q92598		0	1.13011e+07				0.003	0.03674	16.89	0.291618	2	1119.62	1.99731	41.7938	0
	Medium	SLDQDPVVR	1	1	1	Q92598		0	5.91301e+06	1.10611	1		0.032	0.1813	10.79	1.12964	2	1028.54	-0.469218	39.6895	0
Q14254	Flotillin-2 OS=Homo sapiens GN=FLOT2 PE=1 SV=2 - [FLOT2_HUMAN]	16.6	2.1	1	1	1	1	1.48374e+07				428	47.0347	5.24951
	A2	Sequence	# PSMs	# Proteins	# Protein Groups	Protein Group Accessions	Modifications	ΔCn	Area	(Medium+Heavy)/Light	(Medium+Heavy)/Light Count	(Medium+Heavy)/Light Variability [%]	q-Value	PEP	IonScore	Exp Value	Charge	MH+ [Da]	ΔM [ppm]	RT [min]	# Missed Cleavages
	High	EVAAPDVGR	1	1	1	Q14254		0	1.48374e+07				0	0.005444	16.6	0.292066	2	913.473	-0.499264	34.5876	0
P14868	Aspartate--tRNA ligase, cytoplasmic OS=Homo sapiens GN=DARS PE=1 SV=2 - [SYDC_HUMAN]	16.53	1.6	1	1	1	2	3.55299e+06				501	57.1	6.55127
	A2	Sequence	# PSMs	# Proteins	# Protein Groups	Protein Group Accessions	Modifications	ΔCn	Area	(Medium+Heavy)/Light	(Medium+Heavy)/Light Count	(Medium+Heavy)/Light Variability [%]	q-Value	PEP	IonScore	Exp Value	Charge	MH+ [Da]	ΔM [ppm]	RT [min]	# Missed Cleavages
	Medium	ATVNQDTR	2	1	1	P14868		0	3.55299e+06				0.025	0.127	16.53	0.26902	2	904.448	0.167607	20.2878	0
Q15773	Myeloid leukemia factor 2 OS=Homo sapiens GN=MLF2 PE=1 SV=1 - [MLF2_HUMAN]	16.51	4.84	1	1	1	1	2.26968e+07				248	28.1292	6.90283
	A2	Sequence	# PSMs	# Proteins	# Protein Groups	Protein Group Accessions	Modifications	ΔCn	Area	(Medium+Heavy)/Light	(Medium+Heavy)/Light Count	(Medium+Heavy)/Light Variability [%]	q-Value	PEP	IonScore	Exp Value	Charge	MH+ [Da]	ΔM [ppm]	RT [min]	# Missed Cleavages
	High	LAIQGPEDSPSR	1	1	1	Q15773		0	2.26968e+07				0.001	0.02802	16.51	0.31605	2	1269.64	1.104	42.5393	0
Q9UIJ7	GTP:AMP phosphotransferase AK3, mitochondrial OS=Homo sapiens GN=AK3 PE=1 SV=4 - [KAD3_HUMAN]	16.43	4.85	1	1	1	1	1.00378e+07				227	25.5495	9.15869
	A2	Sequence	# PSMs	# Proteins	# Protein Groups	Protein Group Accessions	Modifications	ΔCn	Area	(Medium+Heavy)/Light	(Medium+Heavy)/Light Count	(Medium+Heavy)/Light Variability [%]	q-Value	PEP	IonScore	Exp Value	Charge	MH+ [Da]	ΔM [ppm]	RT [min]	# Missed Cleavages
	High	AVImGAPGSGK	1	1	1	Q9UIJ7	M4(Oxidation)	0	1.00378e+07				0.001	0.02796	16.43	0.291212	2	1003.52	-0.131422	32.1862	0
Q9ULU8	Calcium-dependent secretion activator 1 OS=Homo sapiens GN=CADPS PE=1 SV=3 - [CAPS1_HUMAN]	16.33	0.67	1	1	1	1	3.08593e+06	0.407034	1		1353	152.69	5.70654
	A2	Sequence	# PSMs	# Proteins	# Protein Groups	Protein Group Accessions	Modifications	ΔCn	Area	(Medium+Heavy)/Light	(Medium+Heavy)/Light Count	(Medium+Heavy)/Light Variability [%]	q-Value	PEP	IonScore	Exp Value	Charge	MH+ [Da]	ΔM [ppm]	RT [min]	# Missed Cleavages
	Medium	LQmADQIAR	1	1	1	Q9ULU8	M3(Oxidation)	0	3.08593e+06	0.407034	1		0.023	0.1169	16.33	0.424877	2	1061.54	1.10545	33.7706	0
Q7Z6L0	Proline-rich transmembrane protein 2 OS=Homo sapiens GN=PRRT2 PE=1 SV=1 - [PRRT2_HUMAN]	16.28	2.94	1	1	1	1	2.03425e+06				340	34.9233	4.70361
	A2	Sequence	# PSMs	# Proteins	# Protein Groups	Protein Group Accessions	Modifications	ΔCn	Area	(Medium+Heavy)/Light	(Medium+Heavy)/Light Count	(Medium+Heavy)/Light Variability [%]	q-Value	PEP	IonScore	Exp Value	Charge	MH+ [Da]	ΔM [ppm]	RT [min]	# Missed Cleavages
	High	VLQQLVEEDR	1	1	1	Q7Z6L0		0	2.03425e+06				0.004	0.05574	16.28	0.304979	2	1228.65	-1.99151	50.8075	0
P23396	40S ribosomal protein S3 OS=Homo sapiens GN=RPS3 PE=1 SV=2 - [RS3_HUMAN]	15.79	5.35	1	1	1	1	2.73622e+06				243	26.6714	9.65674
	A2	Sequence	# PSMs	# Proteins	# Protein Groups	Protein Group Accessions	Modifications	ΔCn	Area	(Medium+Heavy)/Light	(Medium+Heavy)/Light Count	(Medium+Heavy)/Light Variability [%]	q-Value	PEP	IonScore	Exp Value	Charge	MH+ [Da]	ΔM [ppm]	RT [min]	# Missed Cleavages
	Medium	DEILPTTPISEQK	1	1	1	P23396		0	2.73622e+06				0.027	0.1495	15.79	0.358541	2	1470.77	-1.96267	56.1125	0
Q9ULD0	2-oxoglutarate dehydrogenase-like, mitochondrial OS=Homo sapiens GN=OGDHL PE=1 SV=3 - [OGDHL_HUMAN]	15.75	0.99	1	1	1	1	2.44463e+06				1010	114.409	6.65381
	A2	Sequence	# PSMs	# Proteins	# Protein Groups	Protein Group Accessions	Modifications	ΔCn	Area	(Medium+Heavy)/Light	(Medium+Heavy)/Light Count	(Medium+Heavy)/Light Variability [%]	q-Value	PEP	IonScore	Exp Value	Charge	MH+ [Da]	ΔM [ppm]	RT [min]	# Missed Cleavages
	High	VIPEDGAAAR	1	1	1	Q9ULD0		0	2.44463e+06				0	0.02417	15.75	0.380484	2	998.526	-0.798042	32.2587	0
P61160	Actin-related protein 2 OS=Homo sapiens GN=ACTR2 PE=1 SV=1 - [ARP2_HUMAN]	15.68	4.82	1	2	2	2	9.73504e+06	0.468418	2	18.7874	394	44.7322	6.7417
	A2	Sequence	# PSMs	# Proteins	# Protein Groups	Protein Group Accessions	Modifications	ΔCn	Area	(Medium+Heavy)/Light	(Medium+Heavy)/Light Count	(Medium+Heavy)/Light Variability [%]	q-Value	PEP	IonScore	Exp Value	Charge	MH+ [Da]	ΔM [ppm]	RT [min]	# Missed Cleavages
	High	VGNIEIK	1	1	1	P61160		0	17136697	0.413121	1		0.005	0.06032	17.48	0.220631	2	772.457	0.362872	39.2563	0
	Medium	DLmVGDEASELR	1	1	1	P61160	M3(Oxidation)	0	2.33339e+06	0.531118	1		0.028	0.1528	15.68	0.173053	2	1350.62	-2.3523	51.9895	0
P61313	60S ribosomal protein L15 OS=Homo sapiens GN=RPL15 PE=1 SV=2 - [RL15_HUMAN]	15.67	4.41	1	1	1	2	1.43382e+07				204	24.1311	11.6196
	A2	Sequence	# PSMs	# Proteins	# Protein Groups	Protein Group Accessions	Modifications	ΔCn	Area	(Medium+Heavy)/Light	(Medium+Heavy)/Light Count	(Medium+Heavy)/Light Variability [%]	q-Value	PEP	IonScore	Exp Value	Charge	MH+ [Da]	ΔM [ppm]	RT [min]	# Missed Cleavages
	High	SLQSVAEER	2	1	1	P61313		0	1.43382e+07				0.004	0.0587	15.88	0.437693	2	1018.51	-5.75905	38.6994	0
Q9Y2A7	Nck-associated protein 1 OS=Homo sapiens GN=NCKAP1 PE=1 SV=1 - [NCKP1_HUMAN]	15.58	1.42	1	2	2	2	1.11116e+07	0.297772	1		1128	128.707	6.62451
	A2	Sequence	# PSMs	# Proteins	# Protein Groups	Protein Group Accessions	Modifications	ΔCn	Area	(Medium+Heavy)/Light	(Medium+Heavy)/Light Count	(Medium+Heavy)/Light Variability [%]	q-Value	PEP	IonScore	Exp Value	Charge	MH+ [Da]	ΔM [ppm]	RT [min]	# Missed Cleavages
	Medium	SVLQPSQQK	1	1	1	Q9Y2A7		0	1.0714e+07				0.012	0.07235	15.58	0.275311	2	1014.56	0.578521	30.6465	0
	Medium	GVGmLTR	1	1	1	Q9Y2A7	M4(Oxidation)	0	1.15092e+07	0.297772	1		0.046	0.2465	10.64	1.85972	2	749.399	2.47304	31.8276	0
Q8WXS5	Voltage-dependent calcium channel gamma-8 subunit OS=Homo sapiens GN=CACNG8 PE=2 SV=3 - [CCG8_HUMAN]	14.89	4.24	1	1	1	1	8.27128e+06				425	43.2861	9.21729
	A2	Sequence	# PSMs	# Proteins	# Protein Groups	Protein Group Accessions	Modifications	ΔCn	Area	(Medium+Heavy)/Light	(Medium+Heavy)/Light Count	(Medium+Heavy)/Light Variability [%]	q-Value	PEP	IonScore	Exp Value	Charge	MH+ [Da]	ΔM [ppm]	RT [min]	# Missed Cleavages
	High	AGGGAGGSGGSGPSAILR	1	1	1	Q8WXS5		0	8.27128e+06				0	0.006223	14.89	0.41029	2	1428.72	1.25391	44.0838	0
P14866	Heterogeneous nuclear ribonucleoprotein L OS=Homo sapiens GN=HNRNPL PE=1 SV=2 - [HNRPL_HUMAN]	14.77	1.87	1	1	1	1	10538093				589	64.0924	8.22119
	A2	Sequence	# PSMs	# Proteins	# Protein Groups	Protein Group Accessions	Modifications	ΔCn	Area	(Medium+Heavy)/Light	(Medium+Heavy)/Light Count	(Medium+Heavy)/Light Variability [%]	q-Value	PEP	IonScore	Exp Value	Charge	MH+ [Da]	ΔM [ppm]	RT [min]	# Missed Cleavages
	High	ISRPGDSDDSR	1	1	1	P14866		0	10538093				0	0.007938	14.77	0.188386	3	1204.55	-0.354108	25.3907	0
P35998	26S protease regulatory subunit 7 OS=Homo sapiens GN=PSMC2 PE=1 SV=3 - [PRS7_HUMAN]	14.63	3	1	1	1	1	4.91578e+06				433	48.6031	5.94775
	A2	Sequence	# PSMs	# Proteins	# Protein Groups	Protein Group Accessions	Modifications	ΔCn	Area	(Medium+Heavy)/Light	(Medium+Heavy)/Light Count	(Medium+Heavy)/Light Variability [%]	q-Value	PEP	IonScore	Exp Value	Charge	MH+ [Da]	ΔM [ppm]	RT [min]	# Missed Cleavages
	High	FDDGAGGDNEVQR	1	1	1	P35998		0	4.91578e+06				0	0.02624	14.63	0.075757	2	1379.59	2.32354	33.3046	0
O43426	Synaptojanin-1 OS=Homo sapiens GN=SYNJ1 PE=1 SV=2 - [SYNJ1_HUMAN]	14.38	0.76	1	1	1	1	24900459				1573	172.995	7.41553
	A2	Sequence	# PSMs	# Proteins	# Protein Groups	Protein Group Accessions	Modifications	ΔCn	Area	(Medium+Heavy)/Light	(Medium+Heavy)/Light Count	(Medium+Heavy)/Light Variability [%]	q-Value	PEP	IonScore	Exp Value	Charge	MH+ [Da]	ΔM [ppm]	RT [min]	# Missed Cleavages
	Medium	VSEQTLQSASSK	1	1	1	O43426		0	24900459				0.023	0.1205	14.38	0.547131	2	1264.64	-2.11903	33.5328	0
P69849	Nodal modulator 3 OS=Homo sapiens GN=NOMO3 PE=2 SV=2 - [NOMO3_HUMAN]	14.05	0.9	3	1	1	1	5.36063e+06				1222	134.049	5.66846
	A2	Sequence	# PSMs	# Proteins	# Protein Groups	Protein Group Accessions	Modifications	ΔCn	Area	(Medium+Heavy)/Light	(Medium+Heavy)/Light Count	(Medium+Heavy)/Light Variability [%]	q-Value	PEP	IonScore	Exp Value	Charge	MH+ [Da]	ΔM [ppm]	RT [min]	# Missed Cleavages
	Medium	IQSTVTQPGGK	1	3	1	P69849		0	5.36063e+06				0.032	0.1731	14.05	0.570648	2	1115.61	4.66477	29.3542	0
P61224	Ras-related protein Rap-1b OS=Homo sapiens GN=RAP1B PE=1 SV=1 - [RAP1B_HUMAN]	14.05	5.98	2	1	1	1	2.38003e+06	0.370472	1		184	20.8116	5.78271
	A2	Sequence	# PSMs	# Proteins	# Protein Groups	Protein Group Accessions	Modifications	ΔCn	Area	(Medium+Heavy)/Light	(Medium+Heavy)/Light Count	(Medium+Heavy)/Light Variability [%]	q-Value	PEP	IonScore	Exp Value	Charge	MH+ [Da]	ΔM [ppm]	RT [min]	# Missed Cleavages
	Medium	LVVLGSGGVGK	1	2	1	P61224		0	2.38003e+06	0.370472	1		0.028	0.1567	14.05	0.234162	2	985.605	0.548452	50.0945	0
Q6P2Q9	Pre-mRNA-processing-splicing factor 8 OS=Homo sapiens GN=PRPF8 PE=1 SV=2 - [PRP8_HUMAN]	14.04	0.47	1	1	1	1	3.89467e+06				2335	273.427	8.83643
	A2	Sequence	# PSMs	# Proteins	# Protein Groups	Protein Group Accessions	Modifications	ΔCn	Area	(Medium+Heavy)/Light	(Medium+Heavy)/Light Count	(Medium+Heavy)/Light Variability [%]	q-Value	PEP	IonScore	Exp Value	Charge	MH+ [Da]	ΔM [ppm]	RT [min]	# Missed Cleavages
	High	EQSQLTATQTR	1	1	1	Q6P2Q9		0	3.89467e+06				0.001	0.02981	14.04	0.613381	2	1262.63	0.604801	29.5877	0
P30101	Protein disulfide-isomerase A3 OS=Homo sapiens GN=PDIA3 PE=1 SV=4 - [PDIA3_HUMAN]	13.7	6.14	1	3	3	5	1.33918e+07	0.392475	2	173.396	505	56.7468	6.354
	A2	Sequence	# PSMs	# Proteins	# Protein Groups	Protein Group Accessions	Modifications	ΔCn	Area	(Medium+Heavy)/Light	(Medium+Heavy)/Light Count	(Medium+Heavy)/Light Variability [%]	q-Value	PEP	IonScore	Exp Value	Charge	MH+ [Da]	ΔM [ppm]	RT [min]	# Missed Cleavages
	High	FVmQEEFSR	2	1	1	P30101	M3(Oxidation)	0	1.4393e+07	0.177301	1		0	0.01739	13.33	0.222967	2	1188.54	0.104128	43.6358	0
	High	LAPEYEAAATR	2	1	1	P30101		0	2.49292e+07				0.001	0.03244	13.26	0.771823	2	1191.6	0.844853	40.5959	0
	High	LSKDPNIVIAK	1	1	1	P30101		0	853129	0.868789	1		0.009	0.06866	13.11	0.151482	3	1197.72	-0.60552	46.536	1
P55884	Eukaryotic translation initiation factor 3 subunit B OS=Homo sapiens GN=EIF3B PE=1 SV=3 - [EIF3B_HUMAN]	13.52	1.72	1	1	1	1	2851529				814	92.4238	4.99561
	A2	Sequence	# PSMs	# Proteins	# Protein Groups	Protein Group Accessions	Modifications	ΔCn	Area	(Medium+Heavy)/Light	(Medium+Heavy)/Light Count	(Medium+Heavy)/Light Variability [%]	q-Value	PEP	IonScore	Exp Value	Charge	MH+ [Da]	ΔM [ppm]	RT [min]	# Missed Cleavages
	High	AQAVSEDAGGNEGR	1	1	1	P55884		0	2851529				0.003	0.03694	13.52	0.215646	2	1360.61	0.337517	25.2104	0
O43759	Synaptogyrin-1 OS=Homo sapiens GN=SYNGR1 PE=1 SV=2 - [SNG1_HUMAN]	13.06	5.15	1	1	1	1	2.03081e+06	1.07495	1		233	25.4393	4.67822
	A2	Sequence	# PSMs	# Proteins	# Protein Groups	Protein Group Accessions	Modifications	ΔCn	Area	(Medium+Heavy)/Light	(Medium+Heavy)/Light Count	(Medium+Heavy)/Light Variability [%]	q-Value	PEP	IonScore	Exp Value	Charge	MH+ [Da]	ΔM [ppm]	RT [min]	# Missed Cleavages
	High	AGGAFDPYTLVR	1	1	1	O43759		0	2.03081e+06	1.07495	1		0	0.01252	13.06	0.820556	2	1266.65	-0.882058	66.9058	0
P29401	Transketolase OS=Homo sapiens GN=TKT PE=1 SV=3 - [TKT_HUMAN]	0	1.44	1	1	1	1	14862010				623	67.8347	7.66455
	A2	Sequence	# PSMs	# Proteins	# Protein Groups	Protein Group Accessions	Modifications	ΔCn	Area	(Medium+Heavy)/Light	(Medium+Heavy)/Light Count	(Medium+Heavy)/Light Variability [%]	q-Value	PEP	IonScore	Exp Value	Charge	MH+ [Da]	ΔM [ppm]	RT [min]	# Missed Cleavages
	High	AVELAANTK	1	1	1	P29401		0	14862010				0	0.006094	22.53	0.0901929	2	916.512	2.80022	32.529	0
P60953	Cell division control protein 42 homolog OS=Homo sapiens GN=CDC42 PE=1 SV=2 - [CDC42_HUMAN]	0	5.76	1	1	1	1					191	21.245	6.55127
	A2	Sequence	# PSMs	# Proteins	# Protein Groups	Protein Group Accessions	Modifications	ΔCn	Area	(Medium+Heavy)/Light	(Medium+Heavy)/Light Count	(Medium+Heavy)/Light Variability [%]	q-Value	PEP	IonScore	Exp Value	Charge	MH+ [Da]	ΔM [ppm]	RT [min]	# Missed Cleavages
	High	QKPITPETAEK	1	1	1	P60953		0	0				0	0.02323	15.52	0.276335	3	1241.67	0.907246	30.9998	0
Q14204	Cytoplasmic dynein 1 heavy chain 1 OS=Homo sapiens GN=DYNC1H1 PE=1 SV=5 - [DYHC1_HUMAN]	0	0.17	1	1	1	1	3.27137e+06				4646	532.072	6.40479
	A2	Sequence	# PSMs	# Proteins	# Protein Groups	Protein Group Accessions	Modifications	ΔCn	Area	(Medium+Heavy)/Light	(Medium+Heavy)/Light Count	(Medium+Heavy)/Light Variability [%]	q-Value	PEP	IonScore	Exp Value	Charge	MH+ [Da]	ΔM [ppm]	RT [min]	# Missed Cleavages
	Medium	IFTIESTR	1	1	1	Q14204		0	3.27137e+06				0.047	0.2501	14.96	0.395751	2	966.526	0.429585	51.8041	0
[truncated: 41 more rows]

## Sheet: AD5
Accession	Description	Score	Coverage	# Proteins	# Unique Peptides	# Peptides	# PSMs	Area	(Medium+Heavy)/Light	(Medium+Heavy)/Light Count	(Medium+Heavy)/Light Variability [%]	# AAs	MW [kDa]	calc. pI
[truncated: 951 more rows]

[truncated: 5 more sheets: C1, C2, C3, C4, C5]
